# Supplementary material for: Leishmania infection upregulates and engages host macrophage Argonaute 1, and system-wide proteomics reveals Argonaute 1-dependent host response
Source: Frontiers journal article supplement (doi:10.3389/fimmu.2023.1287539), 2023-11-30

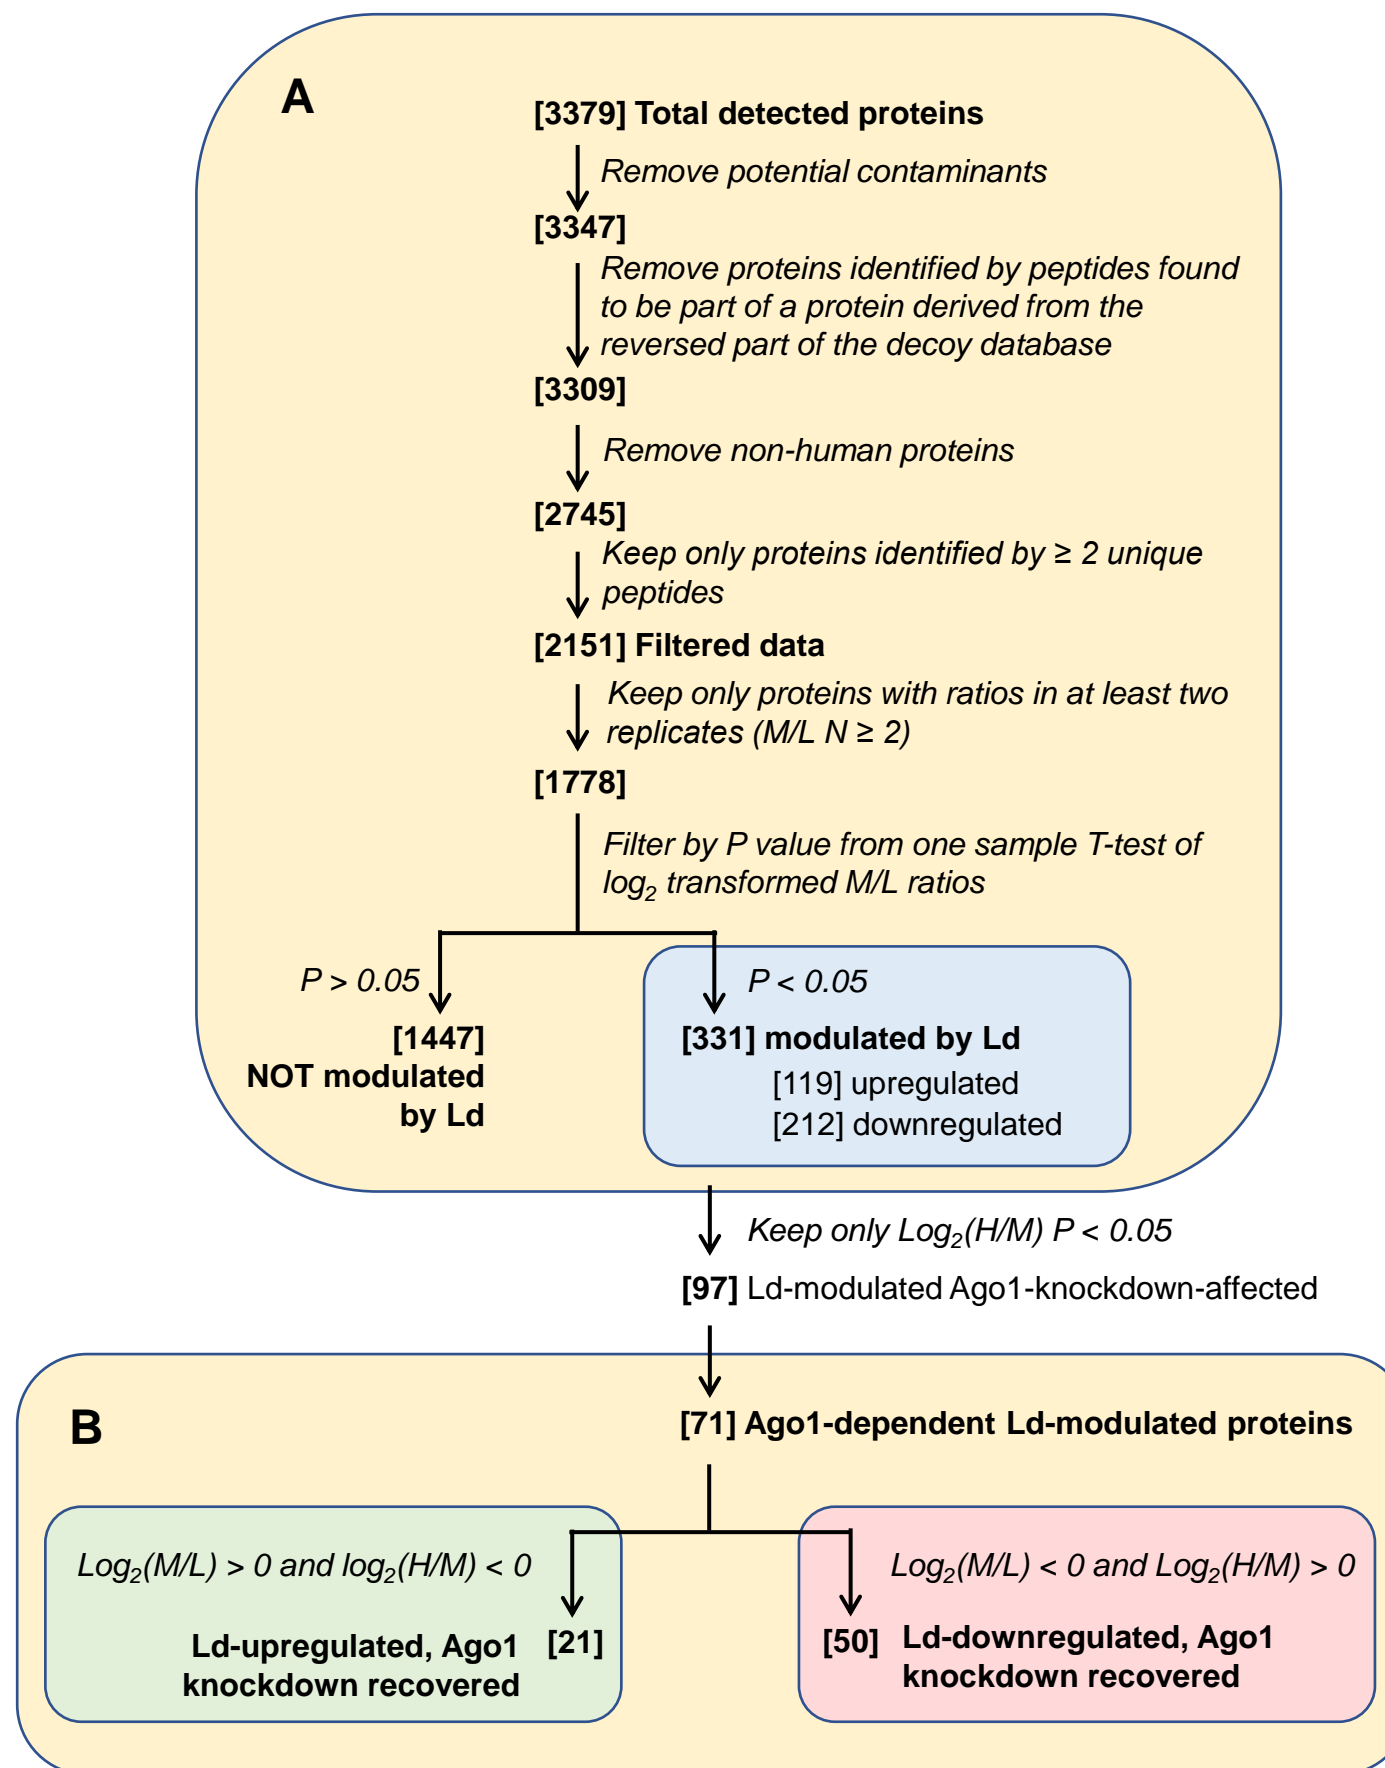

Supplement: Image_4.pdf [file Image_4.pdf]
