# Supplementary material for: Leishmania infection upregulates and engages host macrophage Argonaute 1, and system-wide proteomics reveals Argonaute 1-dependent host response
Source: Front Immunol. 2023 Nov 30;14:1287539. doi: 10.3389/fimmu.2023.1287539 (PMC10720368; doi:10.3389/fimmu.2023.1287539)
Supplement: Supplementary file 6 [file Table_1.xlsx]

## Sheet: (A) All_protein_groups
Protein IDs	Majority protein IDs	Peptide counts (all)	Peptide counts (razor+unique)	Peptide counts (unique)	Protein names	Gene names	Fasta headers	human	Number of proteins	Peptides	Razor + unique peptides	Unique peptides	Peptides 1	Peptides 2	Peptides 3	Razor + unique peptides 1	Razor + unique peptides 2	Razor + unique peptides 3	Unique peptides 1	Unique peptides 2	Unique peptides 3	Sequence coverage [%]	Unique + razor sequence coverage [%]	Unique sequence coverage [%]	Mol. weight [kDa]	Sequence length	Sequence lengths	Q-value	Score	Identification type 1	Identification type 2	Identification type 3	Ratio M/L	Ratio M/L normalized	Ratio M/L variability [%]	Ratio M/L count	Ratio M/L iso-count	Ratio M/L type	Ratio H/L	Ratio H/L normalized	Ratio H/L variability [%]	Ratio H/L count	Ratio H/L iso-count	Ratio H/L type	Ratio H/M	Ratio H/M normalized	Ratio H/M variability [%]	Ratio H/M count	Ratio H/M iso-count
P81605	P81605	3	3	3	Dermcidin;Survival-promoting peptide;DCD-1	DCD	sp|P81605|DCD_HUMAN Dermcidin OS=Homo sapiens OX=9606 GN=DCD PE=1 SV=2	TRUE	1	3	3	3	2	0	3	2	0	3	2	0	3	22.7	22.7	22.7	11.284	110	110	0	6.642	By MS/MS		By MS/MS	0.13524	0.21976	79.151	4	4	Median	0.1696	0.28017	41.79	3	3	Median	0.65147	0.54363	64.228	3	3
A0A024QZX5;A0A087X1N8;P35237;A0A2R8YD12;A0A2R8Y6A7;A0A2R8YDD0;A0A2R8Y517	A0A024QZX5;A0A087X1N8;P35237;A0A2R8YD12;A0A2R8Y6A7	6;6;6;5;4;1;1	5;5;5;4;3;1;1	5;5;5;4;3;1;1	Serpin B6	SERPINB6	tr|A0A024QZX5|A0A024QZX5_HUMAN Serpin B6 OS=Homo sapiens OX=9606 GN=SERPINB6 PE=1 SV=1;tr|A0A087X1N8|A0A087X1N8_HUMAN Serpin B6 OS=Homo sapiens OX=9606 GN=SERPINB6 PE=1 SV=1;sp|P35237|SPB6_HUMAN Serpin B6 OS=Homo sapiens OX=9606 GN=SERPINB6 PE=1 SV=3;tr|A0	TRUE	7	6	5	5	3	3	3	2	2	2	2	2	2	21.1	18.9	18.9	43.024	380	380;395;376;332;171;61;77	0	6.132	By MS/MS	By MS/MS	By MS/MS	0.58824	0.86073	12.981	4	4	Linear	0.5398	0.85351	27.271	4	4	Median	0.91921	0.8537	36.412	4	4
E7EMB6;A0A024R442;E7ETB3;Q9ULA0	E7EMB6;A0A024R442;E7ETB3;Q9ULA0	2;2;2;2	2;2;2;2	2;2;2;2	Aspartyl aminopeptidase	DNPEP	tr|E7EMB6|E7EMB6_HUMAN Aspartyl aminopeptidase OS=Homo sapiens OX=9606 GN=DNPEP PE=1 SV=2;tr|A0A024R442|A0A024R442_HUMAN Aspartyl aminopeptidase, isoform CRA_b OS=Homo sapiens OX=9606 GN=DNPEP PE=1 SV=1;tr|E7ETB3|E7ETB3_HUMAN Aspartyl aminopeptidase, isofo	TRUE	4	2	2	2	1	2	0	1	2	0	1	2	0	7.6	7.6	7.6	44.992	410	410;471;493;475	0	4.0951	By MS/MS	By MS/MS		0.5433	1.0981	59.592	2	2	Median	0.63665	1.2849	48.003	2	2	Median	1.1718	1.1819	104.12	2	2
Q13404;I3L0A0;G3V2F7;A0A0A0MSL3;E5RIF1;D6RG00;H0YBX6	Q13404;I3L0A0;G3V2F7;A0A0A0MSL3	6;5;4;3;2;2;2	2;1;1;1;0;0;0	2;1;1;1;0;0;0	Ubiquitin-conjugating enzyme E2 variant 1	UBE2V1;TMEM189-UBE2V1	sp|Q13404|UB2V1_HUMAN Ubiquitin-conjugating enzyme E2 variant 1 OS=Homo sapiens OX=9606 GN=UBE2V1 PE=1 SV=2;tr|I3L0A0|I3L0A0_HUMAN HCG2044781 OS=Homo sapiens OX=9606 GN=TMEM189-UBE2V1 PE=4 SV=1;tr|G3V2F7|G3V2F7_HUMAN Ubiquitin-conjugating enzyme E2 variant	TRUE	7	6	2	2	6	6	6	2	2	2	2	2	2	38.1	14.3	14.3	16.495	147	147;370;105;103;52;89;154	0	8.6671	By MS/MS	By MS/MS	By MS/MS	0.48469	0.94368	68.25	8	5	Median	0.36728	0.75346	66.44	8	5	Median	0.88352	0.82105	25.644	8	5
Q13740;F5GXJ9;H7C543	Q13740;F5GXJ9;H7C543	10;10;5	10;10;5	10;10;5	CD166 antigen	ALCAM	sp|Q13740|CD166_HUMAN CD166 antigen OS=Homo sapiens OX=9606 GN=ALCAM PE=1 SV=2;tr|F5GXJ9|F5GXJ9_HUMAN CD166 antigen OS=Homo sapiens OX=9606 GN=ALCAM PE=1 SV=1;tr|H7C543|H7C543_HUMAN CD166 antigen (Fragment) OS=Homo sapiens OX=9606 GN=ALCAM PE=1 SV=1	TRUE	3	10	10	10	5	10	5	5	10	5	5	10	5	24	24	24	65.102	583	583;532;344	0	33.187	By MS/MS	By MS/MS	By MS/MS	0.16077	0.31013	112	8	8	Median	0.48706	0.81331	55.474	8	8	Median	2.7282	2.5758	122.49	8	8
P19971;C9JGI3;A0A1W2PP80;A0A1W2PQK0	P19971;C9JGI3	19;16;3;1	19;16;3;1	19;16;3;1	Thymidine phosphorylase	TYMP	sp|P19971|TYPH_HUMAN Thymidine phosphorylase OS=Homo sapiens OX=9606 GN=TYMP PE=1 SV=2;tr|C9JGI3|C9JGI3_HUMAN Thymidine phosphorylase (Fragment) OS=Homo sapiens OX=9606 GN=TYMP PE=1 SV=1	TRUE	4	19	19	19	14	16	15	14	16	15	14	16	15	44.6	44.6	44.6	49.955	482	482;445;73;56	0	123.11	By MS/MS	By MS/MS	By MS/MS	0.30619	0.59501	30.44	53	26	Leave out requantified	1.0496	2.0861	15.006	53	26	Leave out requantified	3.9015	3.4994	24.872	53	26
A0A024R7W5;A0A087X0Q1;A0A087WY31;Q9BYJ9;Q7Z739	A0A024R7W5;A0A087X0Q1;A0A087WY31;Q9BYJ9;Q7Z739	3;3;3;3;3	3;3;3;3;3	1;1;1;1;1	YTH domain-containing family protein 1;YTH domain-containing family protein 3	YTHDF3;YTHDF1	tr|A0A024R7W5|A0A024R7W5_HUMAN YTH domain family, member 3, isoform CRA_a OS=Homo sapiens OX=9606 GN=YTHDF3 PE=1 SV=1;tr|A0A087X0Q1|A0A087X0Q1_HUMAN YTH domain-containing family protein 3 OS=Homo sapiens OX=9606 GN=YTHDF3 PE=1 SV=1;tr|A0A087WY31|A0A087WY31	TRUE	5	3	3	1	1	3	2	1	3	2	1	1	1	6	6	2.6	58.311	534	534;583;588;559;585	0	11.831	By MS/MS	By MS/MS	By MS/MS	0.58661	0.94291	19.129	5	0	Leave out requantified	0.56284	0.85712	6.603	5	0	Leave out requantified	1.0205	0.99647	7.4879	5	0
D6REQ6;D6RHI9;A0A087WZM2;O00584;H0YAE9	D6REQ6;D6RHI9;A0A087WZM2;O00584	4;4;4;4;1	4;4;4;4;1	4;4;4;4;1	Ribonuclease T2	RNASET2	tr|D6REQ6|D6REQ6_HUMAN Ribonuclease T2, isoform CRA_c OS=Homo sapiens OX=9606 GN=RNASET2 PE=1 SV=1;tr|D6RHI9|D6RHI9_HUMAN Ribonuclease T2 (Fragment) OS=Homo sapiens OX=9606 GN=RNASET2 PE=1 SV=8;tr|A0A087WZM2|A0A087WZM2_HUMAN Ribonuclease T2 OS=Homo sapiens	TRUE	5	4	4	4	4	4	2	4	4	2	4	4	2	17.4	17.4	17.4	25.308	218	218;253;306;256;185	0	18.037	By MS/MS	By MS/MS	By MS/MS	0.33834	0.50568	44.502	12	5	Leave out requantified	0.34682	0.47415	36.364	12	5	Leave out requantified	0.83423	0.74874	5.0333	12	5
A0A024RBT2;Q9NR28	A0A024RBT2;Q9NR28	2;2	2;2	2;2	Diablo homolog, mitochondrial	DIABLO	tr|A0A024RBT2|A0A024RBT2_HUMAN Diablo homolog, mitochondrial OS=Homo sapiens OX=9606 GN=DIABLO PE=1 SV=1;sp|Q9NR28|DBLOH_HUMAN Diablo homolog, mitochondrial OS=Homo sapiens OX=9606 GN=DIABLO PE=1 SV=1	TRUE	2	2	2	2	1	2	0	1	2	0	1	2	0	12.7	12.7	12.7	18.919	166	166;239	0	3.9294	By MS/MS	By MS/MS		0.42233	0.90629	19.262	3	2	Plateau	0.53934	1.0331	218.99	3	2	Median	0.96754	1.0064	212.02	3	2
M0R0N4;M0QYZ2;P53680;M0QZ21;X6R390;M0R1S0	M0R0N4;M0QYZ2;P53680;M0QZ21;X6R390	5;5;5;4;4;2	5;5;5;4;4;2	5;5;5;4;4;2	AP-2 complex subunit sigma	AP2S1	tr|M0R0N4|M0R0N4_HUMAN AP complex subunit sigma OS=Homo sapiens OX=9606 GN=AP2S1 PE=1 SV=1;tr|M0QYZ2|M0QYZ2_HUMAN AP complex subunit sigma OS=Homo sapiens OX=9606 GN=AP2S1 PE=1 SV=1;sp|P53680|AP2S1_HUMAN AP-2 complex subunit sigma OS=Homo sapiens OX=9606 G	TRUE	6	5	5	5	3	3	3	3	3	3	3	3	3	37.5	37.5	37.5	17.303	144	144;158;142;122;156;92	0	8.8637	By MS/MS	By MS/MS	By MS/MS	0.59632	1.0997	36.731	7	2	Leave out requantified	0.53246	1.0907	9.8631	7	2	Leave out requantified	1.0657	1.1033	9.1619	7	2
H3BNP3;H3BTL2;H3BS02;O14874	H3BNP3;H3BTL2;H3BS02;O14874	2;2;2;2	2;2;2;2	2;2;2;2	[3-methyl-2-oxobutanoate dehydrogenase [lipoamide]] kinase, mitochondrial	BCKDK	tr|H3BNP3|H3BNP3_HUMAN [3-methyl-2-oxobutanoate dehydrogenase [lipoamide]] kinase, mitochondrial (Fragment) OS=Homo sapiens OX=9606 GN=BCKDK PE=1 SV=1;tr|H3BTL2|H3BTL2_HUMAN [3-methyl-2-oxobutanoate dehydrogenase [lipoamide]] kinase, mitochondrial (Fragmen	TRUE	4	2	2	2	2	2	2	2	2	2	2	2	2	36.4	36.4	36.4	9.3597	88	88;216;217;412	0	12.929	By MS/MS	By MS/MS	By MS/MS	0.79412	1.632	63.78	6	1	Median	0.63999	1.111	5.6656	6	1	Leave out requantified	0.84307	0.81742	53.755	6	1
A0A075B797;M0R3B2;A0A075B6F9;Q9Y314	A0A075B797;M0R3B2;A0A075B6F9;Q9Y314	1;1;1;1	1;1;1;1	1;1;1;1	Nitric oxide synthase-interacting protein	NOSIP	tr|A0A075B797|A0A075B797_HUMAN Nitric oxide synthase-interacting protein (Fragment) OS=Homo sapiens OX=9606 GN=NOSIP PE=1 SV=1;tr|M0R3B2|M0R3B2_HUMAN Nitric oxide synthase-interacting protein (Fragment) OS=Homo sapiens OX=9606 GN=NOSIP PE=1 SV=8;tr|A0A075B	TRUE	4	1	1	1	1	0	1	1	0	1	1	0	1	6.5	6.5	6.5	25.62	232	232;241;304;301	0.0059356	1.9549	By MS/MS		By MS/MS	0.7738	1.1184	19.918	2	0	Median	0.88928	1.1347	12.891	2	0	Median	1.2492	1.1112	17.51	2	0
Q8TCB0;C9JUM8	Q8TCB0;C9JUM8	6;4	6;4	6;4	Interferon-induced protein 44	IFI44	sp|Q8TCB0|IFI44_HUMAN Interferon-induced protein 44 OS=Homo sapiens OX=9606 GN=IFI44 PE=2 SV=2;tr|C9JUM8|C9JUM8_HUMAN Interferon-induced protein 44 (Fragment) OS=Homo sapiens OX=9606 GN=IFI44 PE=1 SV=1	TRUE	2	6	6	6	5	4	5	5	4	5	5	4	5	16.7	16.7	16.7	50.49	444	444;195	0	17.813	By MS/MS	By MS/MS	By MS/MS	0.94017	1.4735	43.649	9	9	Median	3.0448	4.5697	16.963	9	9	Median	3.5549	3.109	35.355	9	9
Q92597;E5RIR1;E5RGM5;E5RIV1;E5RIM2;E5RJ98;E5RG99;E5RJY1;E5RI76;E7ESM1;E5RH82;E5RK17	Q92597;E5RIR1;E5RGM5;E5RIV1;E5RIM2	4;2;2;2;2;1;1;1;1;1;1;1	4;2;2;2;2;1;1;1;1;1;1;1	4;2;2;2;2;1;1;1;1;1;1;1	Protein NDRG1	NDRG1	sp|Q92597|NDRG1_HUMAN Protein NDRG1 OS=Homo sapiens OX=9606 GN=NDRG1 PE=1 SV=1;tr|E5RIR1|E5RIR1_HUMAN Protein NDRG1 (Fragment) OS=Homo sapiens OX=9606 GN=NDRG1 PE=1 SV=1;tr|E5RGM5|E5RGM5_HUMAN Protein NDRG1 (Fragment) OS=Homo sapiens OX=9606 GN=NDRG1 PE=1	TRUE	12	4	4	4	2	4	2	2	4	2	2	4	2	17	17	17	42.835	394	394;158;165;193;216;95;100;103;133;141;156;167	0	16.928	By MS/MS	By MS/MS	By MS/MS	0.7763	1.4815	37.49	9	7	Median	0.68575	1.1446	41.43	9	7	Median	0.82067	0.78198	17.832	9	7
O60869	O60869	4	4	4	Endothelial differentiation-related factor 1	EDF1	sp|O60869|EDF1_HUMAN Endothelial differentiation-related factor 1 OS=Homo sapiens OX=9606 GN=EDF1 PE=1 SV=1	TRUE	1	4	4	4	3	4	3	3	4	3	3	4	3	37.2	37.2	37.2	16.368	148	148	0	13.384	By MS/MS	By MS/MS	By MS/MS	0.44096	0.8654	3.1767	11	6	Leave out requantified	0.57162	1.1144	3.5748	11	6	Leave out requantified	1.2549	1.1663	4.7189	11	6
O14672;H3BS53;H0YK87;C9J9B4	O14672	3;1;1;1	3;1;1;1	3;1;1;1	Disintegrin and metalloproteinase domain-containing protein 10	ADAM10	sp|O14672|ADA10_HUMAN Disintegrin and metalloproteinase domain-containing protein 10 OS=Homo sapiens OX=9606 GN=ADAM10 PE=1 SV=1	TRUE	4	3	3	3	2	3	2	2	3	2	2	3	2	5.5	5.5	5.5	84.141	748	748;58;115;125	0	18.927	By MS/MS	By MS/MS	By MS/MS	0.5132	1.0372	44.563	8	7	Median	0.55515	1.0981	49.496	8	7	Median	1.1009	1.1119	89.355	8	7
P02794;G3V1D1;G3V192;E9PPQ4;E9PRK8;E9PKY7;E9PQR3;E9PKM5;E9PK45	P02794;G3V1D1;G3V192	5;4;4;2;2;2;1;1;1	5;4;4;2;2;2;1;1;1	5;4;4;2;2;2;1;1;1	Ferritin heavy chain;Ferritin heavy chain, N-terminally processed;Ferritin	FTH1	sp|P02794|FRIH_HUMAN Ferritin heavy chain OS=Homo sapiens OX=9606 GN=FTH1 PE=1 SV=2;tr|G3V1D1|G3V1D1_HUMAN Ferritin OS=Homo sapiens OX=9606 GN=FTH1 PE=1 SV=1;tr|G3V192|G3V192_HUMAN Ferritin OS=Homo sapiens OX=9606 GN=FTH1 PE=1 SV=1	TRUE	9	5	5	5	3	2	2	3	2	2	3	2	2	36.6	36.6	36.6	21.225	183	183;113;153;58;95;114;50;81;102	0	6.394	By MS/MS	By MS/MS	By MS/MS	1.1776	1.6304	39.261	7	2	Leave out requantified	1.5036	2.1116	18.125	7	2	Leave out requantified	1.1313	1.0483	15.795	7	2
I3L159;I3L1F5;A0A087WT44;P30519	I3L159;I3L1F5;A0A087WT44;P30519	1;1;1;1	1;1;1;1	1;1;1;1	Heme oxygenase 2	HMOX2	tr|I3L159|I3L159_HUMAN Heme oxygenase 2 (Fragment) OS=Homo sapiens OX=9606 GN=HMOX2 PE=1 SV=1;tr|I3L1F5|I3L1F5_HUMAN Heme oxygenase 2 (Fragment) OS=Homo sapiens OX=9606 GN=HMOX2 PE=1 SV=1;tr|A0A087WT44|A0A087WT44_HUMAN Heme oxygenase 2 OS=Homo sapiens OX=9	TRUE	4	1	1	1	1	1	0	1	1	0	1	1	0	8.3	8.3	8.3	26.578	229	229;238;370;316	0.0035587	2.2861	By MS/MS	By MS/MS		0.54828	1.1443	21.942	3	2	Median	0.51814	1.1505	18.152	3	2	Median	0.81479	0.84849	20.955	2	2
E9PR95;E9PSC3;E9PLC5;E9PLB3;E9PIP1;E9PPB5;E9PQS1;A0A087WT99;A0A1W2PRB8;Q9H0W9	E9PR95;E9PSC3;E9PLC5;E9PLB3;E9PIP1;E9PPB5;E9PQS1;A0A087WT99;A0A1W2PRB8;Q9H0W9	1;1;1;1;1;1;1;1;1;1	1;1;1;1;1;1;1;1;1;1	1;1;1;1;1;1;1;1;1;1	Ester hydrolase C11orf54	C11orf54	tr|E9PR95|E9PR95_HUMAN Ester hydrolase C11orf54 (Fragment) OS=Homo sapiens OX=9606 GN=C11orf54 PE=1 SV=8;tr|E9PSC3|E9PSC3_HUMAN Ester hydrolase C11orf54 (Fragment) OS=Homo sapiens OX=9606 GN=C11orf54 PE=1 SV=8;tr|E9PLC5|E9PLC5_HUMAN Ester hydrolase C11orf5	TRUE	10	1	1	1	1	1	1	1	1	1	1	1	1	22.4	22.4	22.4	8.2526	76	76;95;100;149;171;185;239;256;838;315	0	4.9983	By MS/MS	By MS/MS	By MS/MS	0.75212	1.0641	15.532	3	1	Median	0.75778	0.99467	33.395	3	1	Median	0.85741	0.7992	8.7906	3	1
X6RGC9;K7ES93;O43914	X6RGC9;K7ES93;O43914	2;2;2	2;2;2	2;2;2	TYRO protein tyrosine kinase-binding protein	TYROBP	tr|X6RGC9|X6RGC9_HUMAN TYRO protein tyrosine kinase-binding protein OS=Homo sapiens OX=9606 GN=TYROBP PE=1 SV=1;tr|K7ES93|K7ES93_HUMAN TYRO protein tyrosine kinase-binding protein OS=Homo sapiens OX=9606 GN=TYROBP PE=1 SV=1;sp|O43914|TYOBP_HUMAN TYRO prote	TRUE	3	2	2	2	2	2	2	2	2	2	2	2	2	29.7	29.7	29.7	10.972	101	101;144;113	0	48.605	By MS/MS	By MS/MS	By MS/MS	0.42246	0.86609	4.954	9	3	Leave out requantified	0.53321	0.9944	5.0374	9	3	Leave out requantified	1.4105	1.3545	12.265	8	3
P09914;Q5T764	P09914	21;2	21;2	20;1	Interferon-induced protein with tetratricopeptide repeats 1	IFIT1	sp|P09914|IFIT1_HUMAN Interferon-induced protein with tetratricopeptide repeats 1 OS=Homo sapiens OX=9606 GN=IFIT1 PE=1 SV=2	TRUE	2	21	21	20	14	18	19	14	18	19	13	17	19	42.1	42.1	40.6	55.36	478	478;474	0	130.93	By MS/MS	By MS/MS	By MS/MS	0.83686	1.4237	26.6	54	31	Leave out requantified	1.5767	2.9032	31.969	54	31	Leave out requantified	2.2324	2.0345	22.084	54	31
A0A0B4J1T6;F8WEU0;Q5RIB0;A0A0A0MRU4;H0Y5V3;C9J3G2;A0A0A6YYH9;A0A0B4J2F1;A0A087WWG3;Q5RIB5;F2Z2T4;A0A087X140;E7EUZ7;A0A087WYD2;A0A0B4J2E3;A0A087WZQ3;Q6NVZ8;F8WEG4;Q5JTY2;A0A087WTC0;A0A087X1C0;Q8IUF1;Q4V339;Q5JTY5;Q5RIA9;Q9BRT8	A0A0B4J1T6;F8WEU0;Q5RIB0;A0A0A0MRU4;H0Y5V3;C9J3G2;A0A0A6YYH9;A0A0B4J2F1;A0A087WWG3;Q5RIB5;F2Z2T4;A0A087X140;E7EUZ7;A0A087WYD2;A0A0B4J2E3;A0A087WZQ3;Q6NVZ8;F8WEG4;Q5JTY2;A0A087WTC0;A0A087X1C0;Q8IUF1;Q4V339;Q5JTY5;Q5RIA9;Q9BRT8	1;1;1;1;1;1;1;1;1;1;1;1;1;1;1;1;1;1;1;1;1;1;1;1;1;1	1;1;1;1;1;1;1;1;1;1;1;1;1;1;1;1;1;1;1;1;1;1;1;1;1;1	1;1;1;1;1;1;1;1;1;1;1;1;1;1;1;1;1;1;1;1;1;1;1;1;1;1	COBW domain-containing protein 2;COBW domain-containing protein 6;COBW domain-containing protein 3;COBW domain-containing protein 5;COBW domain-containing protein 1	CBWD1;CBWD2;CBWD5;CBWD3;CBWD7;CBWD6	tr|A0A0B4J1T6|A0A0B4J1T6_HUMAN COBW domain-containing protein 1 OS=Homo sapiens OX=9606 GN=CBWD1 PE=4 SV=1;tr|F8WEU0|F8WEU0_HUMAN COBW domain-containing protein 2 OS=Homo sapiens OX=9606 GN=CBWD2 PE=4 SV=1;tr|Q5RIB0|Q5RIB0_HUMAN COBW domain-containing prot	TRUE	26	1	1	1	1	1	1	1	1	1	1	1	1	18.2	18.2	18.2	8.5238	77	77;182;376;376;376;376;375;359;347;113;250;347;182;182;180;180;180;180;160;160;137;395;395;395;395;395	0.0019789	2.4984	By MS/MS	By MS/MS	By MS/MS	0.56535	0.8528	19.039	3	0	Plateau	0.72968	0.91348	27.141	3	0	Plateau	1.3268	1.1601	3.0828	3	0
F5H5N1;A0A087WXF6;A0A087WTI3;F5GXJ1;O75251	F5H5N1;A0A087WXF6;A0A087WTI3;F5GXJ1;O75251	2;2;2;2;2	2;2;2;2;2	2;2;2;2;2	NADH dehydrogenase [ubiquinone] iron-sulfur protein 7, mitochondrial	NDUFS7	tr|F5H5N1|F5H5N1_HUMAN NADH dehydrogenase [ubiquinone] iron-sulfur protein 7, mitochondrial OS=Homo sapiens OX=9606 GN=NDUFS7 PE=1 SV=1;tr|A0A087WXF6|A0A087WXF6_HUMAN NADH dehydrogenase [ubiquinone] iron-sulfur protein 7, mitochondrial OS=Homo sapiens OX=9	TRUE	5	2	2	2	1	1	1	1	1	1	1	1	1	12.6	12.6	12.6	19.77	182	182;214;214;236;213	0	4.0257	By MS/MS	By MS/MS	By MS/MS	0.53496	1.0019	4.4898	3	3	Median	0.23389	0.49515	66.457	3	3	Plateau	0.47869	0.49666	69.459	3	3
A0A087WTZ5;E9PJ81;E9PRQ7;Q04323	A0A087WTZ5;E9PJ81;E9PRQ7;Q04323	1;1;1;1	1;1;1;1	1;1;1;1	UBX domain-containing protein 1	UBXN1	tr|A0A087WTZ5|A0A087WTZ5_HUMAN UBX domain-containing protein 1 OS=Homo sapiens OX=9606 GN=UBXN1 PE=1 SV=1;tr|E9PJ81|E9PJ81_HUMAN UBX domain-containing protein 1 (Fragment) OS=Homo sapiens OX=9606 GN=UBXN1 PE=1 SV=1;tr|E9PRQ7|E9PRQ7_HUMAN UBX domain-contain	TRUE	4	1	1	1	1	1	1	1	1	1	1	1	1	5	5	5	27.015	238	238;290;293;297	0	6.2869	By MS/MS	By MS/MS	By MS/MS	0.50579	1.0681	5.8589	4	2	Median	0.5105	1.0439	12.19	4	2	Median	1.0686	1.0921	13.609	4	2
A0A087WU02;Q96RQ1;H0YHJ8;H0YI58;F8W0R1;F8VR88;F8VUZ2;H0YI50;F8VPA6	A0A087WU02;Q96RQ1;H0YHJ8;H0YI58;F8W0R1;F8VR88;F8VUZ2;H0YI50;F8VPA6	2;2;1;1;1;1;1;1;1	2;2;1;1;1;1;1;1;1	2;2;1;1;1;1;1;1;1	Endoplasmic reticulum-Golgi intermediate compartment protein 2	ERGIC2	tr|A0A087WU02|A0A087WU02_HUMAN Endoplasmic reticulum-Golgi intermediate compartment protein 2 OS=Homo sapiens OX=9606 GN=ERGIC2 PE=1 SV=1;sp|Q96RQ1|ERGI2_HUMAN Endoplasmic reticulum-Golgi intermediate compartment protein 2 OS=Homo sapiens OX=9606 GN=ERGIC2	TRUE	9	2	2	2	1	1	1	1	1	1	1	1	1	7.8	7.8	7.8	43.432	386	386;377;57;163;172;175;203;209;220	0.0010292	2.8895	By MS/MS	By MS/MS	By MS/MS	1.0287	1.3806	41.412	4	3	Median	1.1889	1.5111	35.574	4	3	Median	1.1174	1.0346	20.515	4	3
A0A087WU03	A0A087WU03	1	1	1		HNRNPDL	tr|A0A087WU03|A0A087WU03_HUMAN Heterogeneous nuclear ribonucleoprotein D-like OS=Homo sapiens OX=9606 GN=HNRNPDL PE=1 SV=1	TRUE	1	1	1	1	1	1	1	1	1	1	1	1	1	31.6	31.6	31.6	6.7215	57	57	0	31.947	By MS/MS	By MS/MS	By MS/MS	0.77187	1.1542	4.7904	4	0	Median	0.87641	1.1258	13.123	4	0	Median	1.2426	1.0146	10.03	4	0
Q9H9J2	Q9H9J2	2	2	2	39S ribosomal protein L44, mitochondrial	MRPL44	sp|Q9H9J2|RM44_HUMAN 39S ribosomal protein L44, mitochondrial OS=Homo sapiens OX=9606 GN=MRPL44 PE=1 SV=1	TRUE	1	2	2	2	2	1	2	2	1	2	2	1	2	4.2	4.2	4.2	37.535	332	332	0	4.0928	By MS/MS	By MS/MS	By MS/MS	0.58976	0.79451	40.322	5	3	Median	0.72531	0.98785	22.288	5	3	Median	1.1071	1.076	28.436	5	3
A0A087WU89;C9JLR9	A0A087WU89;C9JLR9	1;1	1;1	1;1	Uncharacterized protein C11orf95	C11orf95	tr|A0A087WU89|A0A087WU89_HUMAN Uncharacterized protein C11orf95 (Fragment) OS=Homo sapiens OX=9606 GN=C11orf95 PE=1 SV=1;sp|C9JLR9|CK095_HUMAN Uncharacterized protein C11orf95 OS=Homo sapiens OX=9606 GN=C11orf95 PE=1 SV=1	TRUE	2	1	1	1	0	0	1	0	0	1	0	0	1	4	4	4	29.702	276	276;678	0.0041747	2.2174			By MS/MS	NaN	NaN	NaN	0	0	Median	NaN	NaN	NaN	0	0	Median	NaN	NaN	NaN	0	0
Q3V6T2;A0A2R8YGU1;A0A2U3TZV9;A0A2R8Y7B1;A0A2R8YG73;A0A2R8Y4W8;A0A2R8Y4X4;A0A2R8Y6B2;A0A2R8Y7D9;A0A2R8YG52;A0A087WXD9;A0A2R8Y7D4;A0A2R8Y885;A0A2R8Y820;H7C2C6;A0A2R8YDS8;H0Y470;H0Y7U8;A0A2R8YCU9	Q3V6T2;A0A2R8YGU1;A0A2U3TZV9;A0A2R8Y7B1;A0A2R8YG73;A0A2R8Y4W8;A0A2R8Y4X4;A0A2R8Y6B2;A0A2R8Y7D9;A0A2R8YG52;A0A087WXD9	5;5;5;5;5;5;5;4;4;4;4;1;1;1;1;1;1;1;1	5;5;5;5;5;5;5;4;4;4;4;1;1;1;1;1;1;1;1	5;5;5;5;5;5;5;4;4;4;4;1;1;1;1;1;1;1;1	Girdin	CCDC88A	sp|Q3V6T2|GRDN_HUMAN Girdin OS=Homo sapiens OX=9606 GN=CCDC88A PE=1 SV=2;tr|A0A2R8YGU1|A0A2R8YGU1_HUMAN Girdin (Fragment) OS=Homo sapiens OX=9606 GN=CCDC88A PE=1 SV=1;tr|A0A2U3TZV9|A0A2U3TZV9_HUMAN Girdin OS=Homo sapiens OX=9606 GN=CCDC88A PE=1 SV=1;tr|A0A	TRUE	19	5	5	5	4	2	3	4	2	3	4	2	3	3.3	3.3	3.3	216.04	1871	1871;974;1797;1604;1494;1493;1406;526;495;828;741;939;1113;1135;1202;930;888;736;1108	0	12.486	By MS/MS	By MS/MS	By MS/MS	0.80924	1.4489	34.184	8	3	Leave out requantified	0.89545	1.4915	17.015	8	3	Leave out requantified	1.1027	1.0543	32.067	8	3
P14384;F8W111;H0YHN7	P14384;F8W111;H0YHN7	2;2;1	2;2;1	2;2;1	Carboxypeptidase M	CPM	sp|P14384|CBPM_HUMAN Carboxypeptidase M OS=Homo sapiens OX=9606 GN=CPM PE=1 SV=2;tr|F8W111|F8W111_HUMAN Carboxypeptidase M (Fragment) OS=Homo sapiens OX=9606 GN=CPM PE=1 SV=1;tr|H0YHN7|H0YHN7_HUMAN Carboxypeptidase M (Fragment) OS=Homo sapiens OX=9606 GN=C	TRUE	3	2	2	2	2	2	2	2	2	2	2	2	2	6.5	6.5	6.5	50.513	443	443;249;198	0	14.91	By MS/MS	By MS/MS	By MS/MS	0.33081	0.6677	28.385	6	3	Median	0.79477	1.7262	11.05	7	3	Leave out requantified	1.8999	2.0196	6.5288	7	3
A0A087WUD3;Q9NRP0	A0A087WUD3;Q9NRP0	1;1	1;1	1;1	Oligosaccharyltransferase complex subunit OSTC	OSTC	tr|A0A087WUD3|A0A087WUD3_HUMAN Oligosaccharyltransferase complex subunit OSTC OS=Homo sapiens OX=9606 GN=OSTC PE=1 SV=1;sp|Q9NRP0|OSTC_HUMAN Oligosaccharyltransferase complex subunit OSTC OS=Homo sapiens OX=9606 GN=OSTC PE=1 SV=1	TRUE	2	1	1	1	0	1	1	0	1	1	0	1	1	14.5	14.5	14.5	9.369	83	83;149	0.0010306	2.8965		By MS/MS	By MS/MS	NaN	NaN	NaN	1	0	Median	NaN	NaN	NaN	1	0	Median	NaN	NaN	NaN	1	0
P28838;H0Y9Q1;H0Y983	P28838	26;10;4	26;10;4	26;10;4	Cytosol aminopeptidase	LAP3	sp|P28838|AMPL_HUMAN Cytosol aminopeptidase OS=Homo sapiens OX=9606 GN=LAP3 PE=1 SV=3	TRUE	3	26	26	26	25	26	26	25	26	26	25	26	26	59.5	59.5	59.5	56.166	519	519;208;119	0	276.24	By MS/MS	By MS/MS	By MS/MS	0.56322	0.9161	33.878	102	21	Leave out requantified	1.097	1.5476	32.678	102	21	Leave out requantified	1.7501	1.6631	9.3076	102	21
P42224;J3KPM9;E7EPD2;D2KFR9;E7ENM1;E9PH66;H7BZB5;H7BZ88	P42224;J3KPM9	41;37;12;12;10;4;3;2	41;37;12;12;10;4;3;2	41;37;12;12;10;4;3;2	Signal transducer and activator of transcription 1-alpha/beta;Signal transducer and activator of transcription	STAT1	sp|P42224|STAT1_HUMAN Signal transducer and activator of transcription 1-alpha/beta OS=Homo sapiens OX=9606 GN=STAT1 PE=1 SV=2;tr|J3KPM9|J3KPM9_HUMAN Signal transducer and activator of transcription OS=Homo sapiens OX=9606 GN=STAT1 PE=1 SV=1	TRUE	8	41	41	41	35	39	37	35	39	37	35	39	37	54	54	54	87.334	750	750;714;180;193;150;69;58;40	0	314.48	By MS/MS	By MS/MS	By MS/MS	0.59145	1.0029	16.949	132	45	Leave out requantified	1.279	1.8522	17.216	132	45	Leave out requantified	2.0563	1.8845	12.337	131	45
Q15904;A0A0C4DGX8;A6QRJ1	Q15904;A0A0C4DGX8	5;3;2	5;3;2	5;3;2	V-type proton ATPase subunit S1	ATP6AP1	sp|Q15904|VAS1_HUMAN V-type proton ATPase subunit S1 OS=Homo sapiens OX=9606 GN=ATP6AP1 PE=1 SV=2;tr|A0A0C4DGX8|A0A0C4DGX8_HUMAN ATPase, H+ transporting, lysosomal accessory protein 1, isoform CRA_c OS=Homo sapiens OX=9606 GN=ATP6AP1 PE=1 SV=1	TRUE	3	5	5	5	4	4	3	4	4	3	4	4	3	13.2	13.2	13.2	52.025	470	470;281;230	0	15.297	By MS/MS	By MS/MS	By MS/MS	0.51629	0.744	25.784	10	2	Leave out requantified	0.79365	1.0705	42.85	10	2	Leave out requantified	1.3323	1.1826	40.285	10	2
H0YLF3;F5H6I0;P61769	H0YLF3;F5H6I0;P61769	2;2;2	2;2;2	2;2;2	Beta-2-microglobulin;Beta-2-microglobulin form pI 5.3	B2M	tr|H0YLF3|H0YLF3_HUMAN Beta-2-microglobulin (Fragment) OS=Homo sapiens OX=9606 GN=B2M PE=1 SV=1;tr|F5H6I0|F5H6I0_HUMAN Beta-2-microglobulin OS=Homo sapiens OX=9606 GN=B2M PE=1 SV=2;sp|P61769|B2MG_HUMAN Beta-2-microglobulin OS=Homo sapiens OX=9606 GN=B2M PE	TRUE	3	2	2	2	2	2	2	2	2	2	2	2	2	28.2	28.2	28.2	8.4984	71	71;101;119	0	10.599	By MS/MS	By MS/MS	By MS/MS	0.53628	0.79669	13.729	7	1	Leave out requantified	0.81182	1.0301	2.4805	7	1	Leave out requantified	1.4679	1.2553	10.665	7	1
D6RCP9;D6RFG8;P27707	D6RCP9;D6RFG8;P27707	2;2;2	2;2;2	2;2;2	Deoxycytidine kinase	DCK	tr|D6RCP9|D6RCP9_HUMAN Deoxycytidine kinase OS=Homo sapiens OX=9606 GN=DCK PE=1 SV=1;tr|D6RFG8|D6RFG8_HUMAN Deoxycytidine kinase OS=Homo sapiens OX=9606 GN=DCK PE=1 SV=1;sp|P27707|DCK_HUMAN Deoxycytidine kinase OS=Homo sapiens OX=9606 GN=DCK PE=1 SV=1	TRUE	3	2	2	2	2	1	2	2	1	2	2	1	2	10.6	10.6	10.6	22.891	199	199;317;260	0.0013473	2.7005	By MS/MS	By MS/MS	By MS/MS	0.56616	0.81863	8.8117	5	0	Leave out requantified	0.44651	0.61757	9.6083	5	0	Leave out requantified	0.70426	0.62202	20.352	5	0
A0A087WV30;C9JH59;C9J2V2;C9JN51;A0A087X0G7;A0A087WUW6;A0A087X1B1;Q9Y6K9	A0A087WV30;C9JH59;C9J2V2;C9JN51;A0A087X0G7;A0A087WUW6;A0A087X1B1;Q9Y6K9	1;1;1;1;1;1;1;1	1;1;1;1;1;1;1;1	1;1;1;1;1;1;1;1	NF-kappa-B essential modulator	IKBKG	tr|A0A087WV30|A0A087WV30_HUMAN NF-kappa-B essential modulator (Fragment) OS=Homo sapiens OX=9606 GN=IKBKG PE=1 SV=1;tr|C9JH59|C9JH59_HUMAN NF-kappa-B essential modulator (Fragment) OS=Homo sapiens OX=9606 GN=IKBKG PE=1 SV=8;tr|C9J2V2|C9J2V2_HUMAN NF-kappa-	TRUE	8	1	1	1	1	0	0	1	0	0	1	0	0	13.9	13.9	13.9	12.981	115	115;172;195;250;411;412;418;419	0	4.8619	By MS/MS			NaN	NaN	NaN	1	1	Median	NaN	NaN	NaN	1	1	Median	NaN	NaN	NaN	1	1
A0A087WUX8;A0A087WYF7;Q6UXV4	A0A087WUX8;A0A087WYF7;Q6UXV4	1;1;1	1;1;1	1;1;1	MICOS complex subunit MIC27	APOOL	tr|A0A087WUX8|A0A087WUX8_HUMAN MICOS complex subunit OS=Homo sapiens OX=9606 GN=APOOL PE=1 SV=1;tr|A0A087WYF7|A0A087WYF7_HUMAN MICOS complex subunit OS=Homo sapiens OX=9606 GN=APOOL PE=1 SV=1;sp|Q6UXV4|MIC27_HUMAN MICOS complex subunit MIC27 OS=Homo sapien	TRUE	3	1	1	1	1	1	1	1	1	1	1	1	1	6.5	6.5	6.5	28.761	263	263;268;268	0	5.3557	By MS/MS	By MS/MS	By MS/MS	0.57034	1.1977	40.561	3	1	Median	0.56311	1.0787	10.392	3	1	Median	0.78999	0.76913	36.964	3	1
P41218;H0Y6P3	P41218	11;4	11;4	11;4	Myeloid cell nuclear differentiation antigen	MNDA	sp|P41218|MNDA_HUMAN Myeloid cell nuclear differentiation antigen OS=Homo sapiens OX=9606 GN=MNDA PE=1 SV=1	TRUE	2	11	11	11	9	9	11	9	9	11	9	9	11	33.4	33.4	33.4	45.836	407	407;104	0	105.57	By MS/MS	By MS/MS	By MS/MS	0.59247	0.94936	16.861	31	8	Leave out requantified	0.95911	1.2837	17.145	31	8	Leave out requantified	1.5313	1.4063	12.125	31	8
A0A087WV46;C9JXA7;Q0VGL1	A0A087WV46;C9JXA7;Q0VGL1	1;1;1	1;1;1	1;1;1	Ragulator complex protein LAMTOR4;Ragulator complex protein LAMTOR4, N-terminally processed	LAMTOR4	tr|A0A087WV46|A0A087WV46_HUMAN Ragulator complex protein LAMTOR4 OS=Homo sapiens OX=9606 GN=LAMTOR4 PE=1 SV=1;tr|C9JXA7|C9JXA7_HUMAN Ragulator complex protein LAMTOR4 OS=Homo sapiens OX=9606 GN=LAMTOR4 PE=1 SV=1;sp|Q0VGL1|LTOR4_HUMAN Ragulator complex prot	TRUE	3	1	1	1	1	1	1	1	1	1	1	1	1	12.2	12.2	12.2	8.8779	82	82;137;99	0	3.8028	By MS/MS	By MS/MS	By MS/MS	0.29794	0.60086	2.3935	3	2	Plateau	0.33569	0.63945	13.469	3	2	Plateau	1.1339	1.12	18.153	3	2
P15090;E5RIR0;E5RH45;P02689	P15090	9;2;1;1	9;2;1;1	9;2;1;1	Fatty acid-binding protein, adipocyte	FABP4	sp|P15090|FABP4_HUMAN Fatty acid-binding protein, adipocyte OS=Homo sapiens OX=9606 GN=FABP4 PE=1 SV=3	TRUE	4	9	9	9	9	8	8	9	8	8	9	8	8	66.7	66.7	66.7	14.719	132	132;39;60;132	0	98.365	By MS/MS	By MS/MS	By MS/MS	0.55244	0.84887	17.055	37	4	Leave out requantified	1.0399	1.4255	16.176	38	4	Leave out requantified	1.6857	1.6099	11.128	38	4
A0A087WVC1;Q9BQ39	A0A087WVC1;Q9BQ39	3;3	2;2	2;2	ATP-dependent RNA helicase DDX50	DDX50	tr|A0A087WVC1|A0A087WVC1_HUMAN ATP-dependent RNA helicase DDX50 OS=Homo sapiens OX=9606 GN=DDX50 PE=1 SV=1;sp|Q9BQ39|DDX50_HUMAN ATP-dependent RNA helicase DDX50 OS=Homo sapiens OX=9606 GN=DDX50 PE=1 SV=1	TRUE	2	3	2	2	2	2	3	1	1	2	1	1	2	6.6	4.5	4.5	82.226	730	730;737	0	6.0741	By MS/MS	By MS/MS	By MS/MS	0.67113	1.1676	22.388	4	3	Median	0.70015	1.3379	27.313	4	3	Median	1.0789	1.0876	38.829	4	3
A0A087WVC4;A0A0A0MS54;P22694;B1APF7;B1APG1;B1APG0;B1APG2;B1APF8;B1APF9;B1APG3	A0A087WVC4;A0A0A0MS54;P22694;B1APF7;B1APG1;B1APG0;B1APG2;B1APF8;B1APF9;B1APG3	5;5;5;3;3;3;3;3;3;3	2;2;2;2;2;2;2;2;2;2	2;2;2;2;2;2;2;2;2;2	cAMP-dependent protein kinase catalytic subunit beta	PRKACB	tr|A0A087WVC4|A0A087WVC4_HUMAN cAMP-dependent protein kinase catalytic subunit beta OS=Homo sapiens OX=9606 GN=PRKACB PE=1 SV=1;tr|A0A0A0MS54|A0A0A0MS54_HUMAN cAMP-dependent protein kinase catalytic subunit beta OS=Homo sapiens OX=9606 GN=PRKACB PE=1 SV=1;	TRUE	10	5	2	2	3	3	2	1	2	1	1	2	1	15.4	6.2	6.2	39.236	338	338;357;351;186;197;206;209;214;245;264	0	4.7444	By MS/MS	By MS/MS	By MS/MS	0.65493	1.2565	8.578	3	1	Plateau	0.36457	0.62712	12.872	3	1	Plateau	0.70039	0.53214	21.097	3	1
A0A087WY94;A0A087WVD7;Q9Y3D8	A0A087WY94;A0A087WVD7;Q9Y3D8	1;1;1	1;1;1	1;1;1	Adenylate kinase isoenzyme 6	TAF9;AK6	tr|A0A087WY94|A0A087WY94_HUMAN Adenylate kinase isoenzyme 6 OS=Homo sapiens OX=9606 GN=AK6 PE=1 SV=1;tr|A0A087WVD7|A0A087WVD7_HUMAN Adenylate kinase isoenzyme 6 OS=Homo sapiens OX=9606 GN=AK6 PE=1 SV=1;sp|Q9Y3D8|KAD6_HUMAN Adenylate kinase isoenzyme 6 OS=H	TRUE	3	1	1	1	1	1	1	1	1	1	1	1	1	34	34	34	4.9969	47	47;109;172	0	4.447	By MS/MS	By MS/MS	By MS/MS	0.65275	0.97671	18.528	4	3	Median	1.0764	1.4071	16.577	4	3	Median	1.5964	1.413	8.5732	4	3
A0A087WVI1;Q96JY6;C9J760;C9J0X3;C9K0F0;C9JSR2;C9JS55;A0A087WU48;F8WFB8;E5RGS7;A0A087WXJ0;H0YBP7;B3KPU0	A0A087WVI1;Q96JY6;C9J760;C9J0X3;C9K0F0;C9JSR2;C9JS55	3;3;2;2;2;2;2;1;1;1;1;1;1	3;3;2;2;2;2;2;1;1;1;1;1;1	3;3;2;2;2;2;2;1;1;1;1;1;1	PDZ and LIM domain protein 2	PDLIM2	tr|A0A087WVI1|A0A087WVI1_HUMAN PDZ and LIM domain protein 2 OS=Homo sapiens OX=9606 GN=PDLIM2 PE=1 SV=1;sp|Q96JY6|PDLI2_HUMAN PDZ and LIM domain protein 2 OS=Homo sapiens OX=9606 GN=PDLIM2 PE=1 SV=1;tr|C9J760|C9J760_HUMAN PDZ and LIM domain protein 2 (Frag	TRUE	13	3	3	3	1	3	1	1	3	1	1	3	1	14.2	14.2	14.2	34.767	325	325;352;153;173;180;235;254;18;38;132;137;141;146	0	7.8694	By MS/MS	By MS/MS	By matching	0.59842	1.2924	12.599	4	1	Linear	1.0178	1.6066	8.2564	4	1	Median	1.4662	1.4668	18.18	4	1
Q9NVP1;H7C452	Q9NVP1	5;1	5;1	5;1	ATP-dependent RNA helicase DDX18	DDX18	sp|Q9NVP1|DDX18_HUMAN ATP-dependent RNA helicase DDX18 OS=Homo sapiens OX=9606 GN=DDX18 PE=1 SV=2	TRUE	2	5	5	5	2	4	2	2	4	2	2	4	2	9.1	9.1	9.1	75.406	670	670;214	0	12.357	By MS/MS	By MS/MS	By MS/MS	0.58032	0.80936	26.071	5	2	Median	0.70677	0.92961	42.734	5	2	Median	1.6271	1.5631	34.072	5	2
A0A087WVN5;A0A087WWX0;A0A087WVZ9;A0A0A0MQR7;P19388	A0A087WVN5;A0A087WWX0;A0A087WVZ9;A0A0A0MQR7;P19388	1;1;1;1;1	1;1;1;1;1	1;1;1;1;1	DNA-directed RNA polymerases I, II, and III subunit RPABC1	POLR2E	tr|A0A087WVN5|A0A087WVN5_HUMAN DNA-directed RNA polymerases I, II, and III subunit RPABC1 (Fragment) OS=Homo sapiens OX=9606 GN=POLR2E PE=1 SV=1;tr|A0A087WWX0|A0A087WWX0_HUMAN DNA-directed RNA polymerases I, II, and III subunit RPABC1 (Fragment) OS=Homo sa	TRUE	5	1	1	1	1	0	1	1	0	1	1	0	1	16.9	16.9	16.9	9.2766	83	83;134;184;204;210	0	7.2962	By MS/MS		By MS/MS	0.47376	0.6936	19.901	2	2	Median	0.65097	0.84798	18.955	2	2	Median	1.3741	1.2089	42.375	2	2
E9PMD5;E9PI38;E9PQS6;E9PKV4;A0A087WVP0;Q2TAM5;E9PKH5;A0A087X0W8;Q04206	E9PMD5;E9PI38;E9PQS6;E9PKV4;A0A087WVP0;Q2TAM5;E9PKH5;A0A087X0W8;Q04206	1;1;1;1;1;1;1;1;1	1;1;1;1;1;1;1;1;1	1;1;1;1;1;1;1;1;1	Transcription factor p65	RELA	tr|E9PMD5|E9PMD5_HUMAN Transcription factor p65 (Fragment) OS=Homo sapiens OX=9606 GN=RELA PE=1 SV=1;tr|E9PI38|E9PI38_HUMAN Transcription factor p65 (Fragment) OS=Homo sapiens OX=9606 GN=RELA PE=1 SV=1;tr|E9PQS6|E9PQS6_HUMAN Transcription factor p65 (Fragm	TRUE	9	1	1	1	0	1	0	0	1	0	0	1	0	5.6	5.6	5.6	17.868	161	161;185;208;237;246;377;418;448;551	0.0079608	1.8185		By MS/MS		NaN	NaN	NaN	1	1	Median	NaN	NaN	NaN	1	1	Median	NaN	NaN	NaN	1	1
P20618	P20618	11	11	11	Proteasome subunit beta type-1	PSMB1	sp|P20618|PSB1_HUMAN Proteasome subunit beta type-1 OS=Homo sapiens OX=9606 GN=PSMB1 PE=1 SV=2	TRUE	1	11	11	11	8	9	9	8	9	9	8	9	9	52.7	52.7	52.7	26.489	241	241	0	118.62	By MS/MS	By MS/MS	By MS/MS	0.48555	0.93562	10.612	40	8	Leave out requantified	0.6312	1.1134	26.97	40	8	Leave out requantified	1.2647	1.188	23.096	40	8
A0A087WW23;P20292	A0A087WW23;P20292	2;2	2;2	2;2	Arachidonate 5-lipoxygenase-activating protein	ALOX5AP	tr|A0A087WW23|A0A087WW23_HUMAN Arachidonate 5-lipoxygenase-activating protein OS=Homo sapiens OX=9606 GN=ALOX5AP PE=1 SV=1;sp|P20292|AL5AP_HUMAN Arachidonate 5-lipoxygenase-activating protein OS=Homo sapiens OX=9606 GN=ALOX5AP PE=1 SV=2	TRUE	2	2	2	2	0	1	2	0	1	2	0	1	2	9.6	9.6	9.6	24.208	218	218;161	0	10.039		By MS/MS	By MS/MS	NaN	NaN	NaN	0	0	Median	NaN	NaN	NaN	0	0	Median	NaN	NaN	NaN	0	0
H0YD13;H0Y2P0;P16070;H0YE40;H0YDX6;H0YD17;J3KN83;H0YDW7;H0YCV9;H0Y5E4	H0YD13;H0Y2P0;P16070;H0YE40	4;4;4;3;1;1;1;1;1;1	4;4;4;3;1;1;1;1;1;1	4;4;4;3;1;1;1;1;1;1	CD44 antigen	CD44	tr|H0YD13|H0YD13_HUMAN CD44 antigen OS=Homo sapiens OX=9606 GN=CD44 PE=1 SV=2;tr|H0Y2P0|H0Y2P0_HUMAN CD44 antigen (Fragment) OS=Homo sapiens OX=9606 GN=CD44 PE=1 SV=1;sp|P16070|CD44_HUMAN CD44 antigen OS=Homo sapiens OX=9606 GN=CD44 PE=1 SV=3;tr|H0YE40|H0Y	TRUE	10	4	4	4	4	3	4	4	3	4	4	3	4	23.8	23.8	23.8	22.683	206	206;287;742;82;183;229;232;240;277;294	0	32.551	By MS/MS	By MS/MS	By MS/MS	0.68413	1.4329	6.8094	12	2	Leave out requantified	0.73305	1.4629	53.976	12	2	Leave out requantified	1.0357	1.0298	57.346	12	2
E9PKP7;P17480;E9PLT2;E9PMM2	E9PKP7;P17480	8;8;3;2	8;8;3;2	8;8;3;2	Nucleolar transcription factor 1	UBTF	tr|E9PKP7|E9PKP7_HUMAN Nucleolar transcription factor 1 OS=Homo sapiens OX=9606 GN=UBTF PE=1 SV=1;sp|P17480|UBF1_HUMAN Nucleolar transcription factor 1 OS=Homo sapiens OX=9606 GN=UBTF PE=1 SV=1	TRUE	4	8	8	8	3	6	3	3	6	3	3	6	3	13.3	13.3	13.3	87.435	745	745;764;194;149	0	13.031	By MS/MS	By MS/MS	By MS/MS	0.51529	0.79456	55.614	10	9	Median	0.63627	0.91173	38.154	9	8	Median	1.1555	1.1659	63.354	9	8
A2A376;O95786	A2A376;O95786	13;13	13;13	13;13	Probable ATP-dependent RNA helicase DDX58	DDX58	tr|A2A376|A2A376_HUMAN Probable ATP-dependent RNA helicase DDX58 OS=Homo sapiens OX=9606 GN=DDX58 PE=1 SV=1;sp|O95786|DDX58_HUMAN Probable ATP-dependent RNA helicase DDX58 OS=Homo sapiens OX=9606 GN=DDX58 PE=1 SV=2	TRUE	2	13	13	13	8	9	12	8	9	12	8	9	12	23.3	23.3	23.3	82.612	722	722;925	0	55.909	By MS/MS	By MS/MS	By MS/MS	1.0713	1.5838	30.243	32	21	Leave out requantified	1.7409	2.5246	24.658	32	21	Leave out requantified	2.0087	1.8312	29.221	31	21
Q32P28;H7C2W6;E2QRI1	Q32P28	11;5;3	11;5;3	11;5;3	Prolyl 3-hydroxylase 1	LEPRE1	sp|Q32P28|P3H1_HUMAN Prolyl 3-hydroxylase 1 OS=Homo sapiens OX=9606 GN=P3H1 PE=1 SV=2	TRUE	3	11	11	11	8	6	8	8	6	8	8	6	8	14.1	14.1	14.1	83.393	736	736;222;207	0	32.579	By MS/MS	By MS/MS	By MS/MS	0.48975	0.74967	30.073	24	5	Leave out requantified	0.56268	0.86343	20.772	24	5	Leave out requantified	1.2432	1.1401	27.517	24	5
V9GYP5;A0A087WWQ2;Q92979	V9GYP5;A0A087WWQ2;Q92979	1;1;1	1;1;1	1;1;1	Ribosomal RNA small subunit methyltransferase NEP1	EMG1	tr|V9GYP5|V9GYP5_HUMAN Ribosomal RNA small subunit methyltransferase NEP1 (Fragment) OS=Homo sapiens OX=9606 GN=EMG1 PE=1 SV=2;tr|A0A087WWQ2|A0A087WWQ2_HUMAN Ribosomal RNA small subunit methyltransferase NEP1 (Fragment) OS=Homo sapiens OX=9606 GN=EMG1 PE=1	TRUE	3	1	1	1	1	0	1	1	0	1	1	0	1	9.2	9.2	9.2	23.79	217	217;223;244	0.0010381	2.983	By MS/MS		By MS/MS	1.5911	2.3572	9.0404	2	2	Median	0.57105	0.73578	21.656	2	2	Median	0.35891	0.31041	27.946	2	2
A0A087WWS1;Q96FV9	A0A087WWS1;Q96FV9	1;1	1;1	1;1	THO complex subunit 1	THOC1	tr|A0A087WWS1|A0A087WWS1_HUMAN THO complex subunit 1 OS=Homo sapiens OX=9606 GN=THOC1 PE=1 SV=1;sp|Q96FV9|THOC1_HUMAN THO complex subunit 1 OS=Homo sapiens OX=9606 GN=THOC1 PE=1 SV=1	TRUE	2	1	1	1	0	0	1	0	0	1	0	0	1	2.7	2.7	2.7	75.651	657	657;657	0.0038622	2.2437			By MS/MS	NaN	NaN	NaN	0	0	Median	NaN	NaN	NaN	0	0	Median	NaN	NaN	NaN	0	0
A0A087WXX8;A0A087WWT1;P21912	A0A087WXX8;A0A087WWT1;P21912	1;1;1	1;1;1	1;1;1	Succinate dehydrogenase [ubiquinone] iron-sulfur subunit, mitochondrial	SDHB	tr|A0A087WXX8|A0A087WXX8_HUMAN Succinate dehydrogenase [ubiquinone] iron-sulfur subunit, mitochondrial (Fragment) OS=Homo sapiens OX=9606 GN=SDHB PE=1 SV=1;tr|A0A087WWT1|A0A087WWT1_HUMAN Succinate dehydrogenase [ubiquinone] iron-sulfur subunit, mitochondri	TRUE	3	1	1	1	1	1	1	1	1	1	1	1	1	11.4	11.4	11.4	14.143	123	123;200;280	0	3.5696	By MS/MS	By MS/MS	By MS/MS	1.0302	1.482	13.715	3	0	Median	0.72594	0.92664	12.08	3	0	Median	0.8107	0.76739	13.511	3	0
A0A087WWU8;D6R904;K7EP68;D6RFM2;H0YL80;H0YKP3	A0A087WWU8	31;15;7;6;6;5	31;15;7;6;6;5	0;0;0;0;0;0		TPM3	tr|A0A087WWU8|A0A087WWU8_HUMAN Tropomyosin alpha-3 chain OS=Homo sapiens OX=9606 GN=TPM3 PE=1 SV=1	TRUE	6	31	31	0	26	30	31	26	30	31	0	0	0	78.4	78.4	0	26.42	227	227;95;138;49;68;157	0	295.86	By MS/MS	By MS/MS	By MS/MS	0.5124	0.90981	22.47	125	22	Leave out requantified	0.52005	0.8993	23.747	125	22	Leave out requantified	1.0339	1.0015	13.063	125	22
A0A3B3IUC4;P06280;A0A3B3IRU3;V9GYN5	A0A3B3IUC4;P06280	7;7;2;2	7;7;2;2	7;7;2;2	Alpha-galactosidase A	GLA	tr|A0A3B3IUC4|A0A3B3IUC4_HUMAN Alpha-galactosidase OS=Homo sapiens OX=9606 GN=GLA PE=1 SV=1;sp|P06280|AGAL_HUMAN Alpha-galactosidase A OS=Homo sapiens OX=9606 GN=GLA PE=1 SV=1	TRUE	4	7	7	7	7	4	4	7	4	4	7	4	4	17.9	17.9	17.9	53.283	470	470;429;199;222	0	23.781	By MS/MS	By MS/MS	By MS/MS	0.56925	1.0021	38.421	15	12	Leave out requantified	0.45803	0.86349	7.9799	15	12	Leave out requantified	0.96442	0.91016	33.076	15	12
A0A1W2PNX8;Q9H3U1	A0A1W2PNX8;Q9H3U1	6;6	6;6	6;6	Protein unc-45 homolog A	UNC45A	tr|A0A1W2PNX8|A0A1W2PNX8_HUMAN Protein unc-45 homolog A OS=Homo sapiens OX=9606 GN=UNC45A PE=1 SV=1;sp|Q9H3U1|UN45A_HUMAN Protein unc-45 homolog A OS=Homo sapiens OX=9606 GN=UNC45A PE=1 SV=1	TRUE	2	6	6	6	5	4	4	5	4	4	5	4	4	7.5	7.5	7.5	118.39	1084	1084;944	0	19.858	By MS/MS	By MS/MS	By MS/MS	0.3983	0.80497	14.143	11	4	Leave out requantified	0.55568	1.0514	9.0092	11	4	Leave out requantified	1.1165	1.0994	30.089	11	4
Q5EBM0	Q5EBM0	7	7	7	UMP-CMP kinase 2, mitochondrial	CMPK2	sp|Q5EBM0|CMPK2_HUMAN UMP-CMP kinase 2, mitochondrial OS=Homo sapiens OX=9606 GN=CMPK2 PE=1 SV=3	TRUE	1	7	7	7	2	5	5	2	5	5	2	5	5	25.2	25.2	25.2	49.447	449	449	0	18.157	By MS/MS	By MS/MS	By MS/MS	0.50473	0.86963	18.072	13	9	Leave out requantified	1.4873	2.3669	26.836	13	9	Leave out requantified	2.9015	2.6451	7.761	13	9
A0A087WXP3;E9PEE8;P18564	A0A087WXP3;E9PEE8;P18564	1;1;1	1;1;1	1;1;1	Integrin beta;Integrin beta-6	ITGB6	tr|A0A087WXP3|A0A087WXP3_HUMAN Integrin beta OS=Homo sapiens OX=9606 GN=ITGB6 PE=1 SV=1;tr|E9PEE8|E9PEE8_HUMAN Integrin beta OS=Homo sapiens OX=9606 GN=ITGB6 PE=1 SV=1;sp|P18564|ITB6_HUMAN Integrin beta-6 OS=Homo sapiens OX=9606 GN=ITGB6 PE=1 SV=2	TRUE	3	1	1	1	1	1	1	1	1	1	1	1	1	1.3	1.3	1.3	75.849	693	693;746;788	0.0073642	1.834	By MS/MS	By MS/MS	By MS/MS	0.72311	1.0594	12.501	3	0	Median	0.78532	0.99777	13.664	3	0	Median	1.0308	0.95688	7.6512	3	0
A0A2R8YEU9;A0A2R8Y459;A0A2R8YEH2;A0A2R8Y6Y1;A0A2R8YGP2;A0A2R8Y6Q6;A0A2R8YCJ4;A0A087WZJ6;A0A2R8Y761;A0A087WXR7;A0A2R8YCX2;A0A2R8Y7Q3;A0A2R8Y883;A0A2R8Y6M7;A0A2R8YCP1;A0A2R8YE60;A0A2R8Y687;A0A2R8Y4S2;A0A2R8YEC1;A0A2R8Y7R8;Q5TBB1	A0A2R8YEU9;A0A2R8Y459;A0A2R8YEH2;A0A2R8Y6Y1;A0A2R8YGP2;A0A2R8Y6Q6;A0A2R8YCJ4;A0A087WZJ6;A0A2R8Y761;A0A087WXR7;A0A2R8YCX2;A0A2R8Y7Q3;A0A2R8Y883;A0A2R8Y6M7;A0A2R8YCP1;A0A2R8YE60;A0A2R8Y687;A0A2R8Y4S2;A0A2R8YEC1;A0A2R8Y7R8;Q5TBB1	1;1;1;1;1;1;1;1;1;1;1;1;1;1;1;1;1;1;1;1;1	1;1;1;1;1;1;1;1;1;1;1;1;1;1;1;1;1;1;1;1;1	1;1;1;1;1;1;1;1;1;1;1;1;1;1;1;1;1;1;1;1;1	Ribonuclease H2 subunit B	RNASEH2B	tr|A0A2R8YEU9|A0A2R8YEU9_HUMAN Ribonuclease H2 subunit B (Fragment) OS=Homo sapiens OX=9606 GN=RNASEH2B PE=1 SV=1;tr|A0A2R8Y459|A0A2R8Y459_HUMAN Ribonuclease H2 subunit B (Fragment) OS=Homo sapiens OX=9606 GN=RNASEH2B PE=1 SV=1;tr|A0A2R8YEH2|A0A2R8YEH2_HUM	TRUE	21	1	1	1	1	1	1	1	1	1	1	1	1	21.2	21.2	21.2	11.313	104	104;164;324;320;309;300;293;289;289;282;273;268;266;263;254;243;238;229;227;355;312	0	5.2245	By MS/MS	By MS/MS	By MS/MS	0.46072	0.86759	20.835	3	3	Plateau	0.39589	0.58935	33.276	3	3	Median	0.75753	0.63497	30.103	3	3
K7ERP4;K7EKX7;R4GNE4;K7ENB4;A0A087X2I2;A0A087WT12;K7EJ20;P36969;A0A087X247;A0A0A0MTT1	K7ERP4;K7EKX7;R4GNE4;K7ENB4;A0A087X2I2;A0A087WT12;K7EJ20;P36969	3;3;3;3;3;3;3;3;1;1	3;3;3;3;3;3;3;3;1;1	3;3;3;3;3;3;3;3;1;1	Glutathione peroxidase;Phospholipid hydroperoxide glutathione peroxidase, mitochondrial	GPX4	tr|K7ERP4|K7ERP4_HUMAN Glutathione peroxidase (Fragment) OS=Homo sapiens OX=9606 GN=GPX4 PE=1 SV=1;tr|K7EKX7|K7EKX7_HUMAN Glutathione peroxidase (Fragment) OS=Homo sapiens OX=9606 GN=GPX4 PE=1 SV=3;tr|R4GNE4|R4GNE4_HUMAN Glutathione peroxidase (Fragment) O	TRUE	10	3	3	3	3	3	1	3	3	1	3	3	1	29.7	29.7	29.7	17.629	155	155;175;179;180;196;233;242;197;134;166	0	8.8529	By MS/MS	By MS/MS	By MS/MS	0.49912	1.0297	30.266	9	8	Median	0.51318	1.0363	29.073	9	8	Median	1.0282	1.0283	36.869	9	8
Q92542;Q5T205;H0Y6T7;H0Y3Z4;Q5T209	Q92542;Q5T205;H0Y6T7;H0Y3Z4	7;5;5;5;2	7;5;5;5;2	7;5;5;5;2	Nicastrin	NCSTN	sp|Q92542|NICA_HUMAN Nicastrin OS=Homo sapiens OX=9606 GN=NCSTN PE=1 SV=2;tr|Q5T205|Q5T205_HUMAN Nicastrin (Fragment) OS=Homo sapiens OX=9606 GN=NCSTN PE=1 SV=1;tr|H0Y6T7|H0Y6T7_HUMAN Nicastrin (Fragment) OS=Homo sapiens OX=9606 GN=NCSTN PE=1 SV=1;tr|H0Y3Z	TRUE	5	7	7	7	6	5	5	6	5	5	6	5	5	11.3	11.3	11.3	78.41	709	709;219;275;316;255	0	18.413	By MS/MS	By MS/MS	By MS/MS	0.46142	0.88049	32.593	17	3	Leave out requantified	0.58751	1.009	12.704	17	3	Leave out requantified	1.1399	1.0925	16.726	17	3
P20591;F8W8T1;H9KVC7;H9KVC9;H9KVD0;H9KVC4;H9KVD3;H9KVC3	P20591;F8W8T1	31;29;11;11;4;4;3;2	31;29;11;11;4;4;3;2	29;29;9;9;4;4;3;2	Interferon-induced GTP-binding protein Mx1;Interferon-induced GTP-binding protein Mx1, N-terminally processed	MX1	sp|P20591|MX1_HUMAN Interferon-induced GTP-binding protein Mx1 OS=Homo sapiens OX=9606 GN=MX1 PE=1 SV=4;tr|F8W8T1|F8W8T1_HUMAN Interferon-induced GTP-binding protein Mx1 OS=Homo sapiens OX=9606 GN=MX1 PE=1 SV=1	TRUE	8	31	31	29	23	25	28	23	25	28	21	23	26	62.5	62.5	56.9	75.519	662	662;639;197;201;68;77;35;25	0	323.31	By MS/MS	By MS/MS	By MS/MS	0.69799	1.1288	30.866	96	45	Leave out requantified	2.5239	3.5099	17.144	96	45	Leave out requantified	3.4405	3.2035	32.103	96	45
A0A087WY82;Q9Y624	A0A087WY82;Q9Y624	2;2	2;2	2;2	Junctional adhesion molecule A	F11R	tr|A0A087WY82|A0A087WY82_HUMAN Junctional adhesion molecule A OS=Homo sapiens OX=9606 GN=F11R PE=1 SV=1;sp|Q9Y624|JAM1_HUMAN Junctional adhesion molecule A OS=Homo sapiens OX=9606 GN=F11R PE=1 SV=1	TRUE	2	2	2	2	1	1	1	1	1	1	1	1	1	12.2	12.2	12.2	30.197	279	279;299	0	3.5318	By MS/MS	By MS/MS	By MS/MS	0.62611	0.87149	35.154	2	2	Median	NaN	NaN	NaN	1	1	Median	NaN	NaN	NaN	1	1
A0A087WYC0;A0A2Q2TH77;Q08379	A0A087WYC0;A0A2Q2TH77;Q08379	1;1;1	1;1;1	1;1;1	Golgin subfamily A member 2	GOLGA2	tr|A0A087WYC0|A0A087WYC0_HUMAN Golgin subfamily A member 2 OS=Homo sapiens OX=9606 GN=GOLGA2 PE=1 SV=1;tr|A0A2Q2TH77|A0A2Q2TH77_HUMAN Golgin subfamily A member 2 OS=Homo sapiens OX=9606 GN=GOLGA2 PE=1 SV=1;sp|Q08379|GOGA2_HUMAN Golgin subfamily A member 2	TRUE	3	1	1	1	1	1	1	1	1	1	1	1	1	3.5	3.5	3.5	31.894	286	286;990;1002	0	3.7003	By MS/MS	By MS/MS	By MS/MS	0.67938	1.3058	13.597	3	0	Median	0.74006	1.3997	16.221	3	0	Plateau	1.4226	1.3998	23.869	3	0
P14927;B7Z2R2	P14927;B7Z2R2	4;2	4;2	4;2	Cytochrome b-c1 complex subunit 7	UQCRB	sp|P14927|QCR7_HUMAN Cytochrome b-c1 complex subunit 7 OS=Homo sapiens OX=9606 GN=UQCRB PE=1 SV=2;tr|B7Z2R2|B7Z2R2_HUMAN Cytochrome b-c1 complex subunit 7 OS=Homo sapiens OX=9606 GN=UQCRB PE=1 SV=1	TRUE	2	4	4	4	2	3	3	2	3	3	2	3	3	42.3	42.3	42.3	13.53	111	111;161	0	17.217	By MS/MS	By MS/MS	By MS/MS	0.60538	0.86088	14.93	9	7	Median	0.621	0.83365	20.099	9	7	Median	0.95767	0.88959	15.76	9	7
P19525;C9JZT2;F8WBH4	P19525	19;6;5	19;6;5	19;6;5	Interferon-induced, double-stranded RNA-activated protein kinase	EIF2AK2	sp|P19525|E2AK2_HUMAN Interferon-induced, double-stranded RNA-activated protein kinase OS=Homo sapiens OX=9606 GN=EIF2AK2 PE=1 SV=2	TRUE	3	19	19	19	15	14	15	15	14	15	15	14	15	36.1	36.1	36.1	62.094	551	551;141;102	0	123.6	By MS/MS	By MS/MS	By MS/MS	0.61277	1.015	25.843	49	18	Leave out requantified	1.1204	1.5806	29.415	49	18	Leave out requantified	1.8947	1.6291	19.986	48	18
A0A087WYR0;P09132	A0A087WYR0;P09132	1;1	1;1	1;1	Signal recognition particle 19 kDa protein	SRP19	tr|A0A087WYR0|A0A087WYR0_HUMAN Signal recognition particle 19 kDa protein OS=Homo sapiens OX=9606 GN=SRP19 PE=1 SV=1;sp|P09132|SRP19_HUMAN Signal recognition particle 19 kDa protein OS=Homo sapiens OX=9606 GN=SRP19 PE=1 SV=3	TRUE	2	1	1	1	1	1	1	1	1	1	1	1	1	12.5	12.5	12.5	13.654	120	120;144	0.00035753	3.4033	By MS/MS	By MS/MS	By MS/MS	0.78036	1.1041	13.054	3	0	Plateau	0.77526	1.0052	11.007	3	0	Median	0.94546	0.81012	15.847	3	0
Q13242;H0YIB4;S4R3G0	Q13242;H0YIB4;S4R3G0	6;4;4	6;4;4	6;4;4	Serine/arginine-rich splicing factor 9	SRSF9	sp|Q13242|SRSF9_HUMAN Serine/arginine-rich splicing factor 9 OS=Homo sapiens OX=9606 GN=SRSF9 PE=1 SV=1;tr|H0YIB4|H0YIB4_HUMAN Serine/arginine-rich-splicing factor 9 (Fragment) OS=Homo sapiens OX=9606 GN=SRSF9 PE=1 SV=8;tr|S4R3G0|S4R3G0_HUMAN Serine/argini	TRUE	3	6	6	6	6	4	4	6	4	4	6	4	4	30.3	30.3	30.3	25.542	221	221;109;119	0	12.385	By MS/MS	By MS/MS	By MS/MS	0.57653	1.0477	86.532	14	10	Median	0.45264	0.74686	14.953	14	10	Leave out requantified	0.66973	0.70387	81.619	14	10
Q92820	Q92820	4	4	4	Gamma-glutamyl hydrolase	GGH	sp|Q92820|GGH_HUMAN Gamma-glutamyl hydrolase OS=Homo sapiens OX=9606 GN=GGH PE=1 SV=2	TRUE	1	4	4	4	2	2	3	2	2	3	2	2	3	12.6	12.6	12.6	35.964	318	318	0	6.9609	By MS/MS	By MS/MS	By MS/MS	0.43896	0.71142	34.771	5	4	Median	0.37823	0.58132	34.339	4	3	Median	0.85258	0.7636	49.962	4	3
A0A087WZ32;A0A087X038;A8K727;Q9HB19	A0A087WZ32;A0A087X038;A8K727;Q9HB19	2;2;2;2	2;2;2;2	2;2;2;2	Pleckstrin homology domain-containing family A member 2	PLEKHA2	tr|A0A087WZ32|A0A087WZ32_HUMAN Pleckstrin homology domain-containing family A member 2 OS=Homo sapiens OX=9606 GN=PLEKHA2 PE=1 SV=1;tr|A0A087X038|A0A087X038_HUMAN Pleckstrin homology domain-containing family A member 2 OS=Homo sapiens OX=9606 GN=PLEKHA2 PE	TRUE	4	2	2	2	2	2	1	2	2	1	2	2	1	7.5	7.5	7.5	41.21	375	375;376;425;425	0	5.017	By MS/MS	By MS/MS	By MS/MS	0.90246	1.2476	41.427	3	2	Median	0.76782	1.0074	33.64	3	2	Median	0.9031	0.85095	7.3624	3	2
A0A087WZE9;P05204;Q15651	A0A087WZE9;P05204;Q15651	1;1;1	1;1;1	1;1;1	Non-histone chromosomal protein HMG-17;High mobility group nucleosome-binding domain-containing protein 3	HMGN3;HMGN2	tr|A0A087WZE9|A0A087WZE9_HUMAN High mobility group nucleosome-binding domain-containing protein 3 OS=Homo sapiens OX=9606 GN=HMGN3 PE=1 SV=1;sp|P05204|HMGN2_HUMAN Non-histone chromosomal protein HMG-17 OS=Homo sapiens OX=9606 GN=HMGN2 PE=1 SV=3;sp|Q15651|H	TRUE	3	1	1	1	1	1	1	1	1	1	1	1	1	10	10	10	13.956	130	130;90;99	0.00069955	3.1178	By MS/MS	By MS/MS	By MS/MS	0.57151	0.77972	22.374	3	0	Plateau	0.53532	0.64127	9.5164	3	0	Median	0.81333	0.74756	28.854	3	0
A0A087WZF1;Q93052;C9JXK9;C9JUT4	A0A087WZF1;Q93052;C9JXK9;C9JUT4	2;2;1;1	2;2;1;1	2;2;1;1	Lipoma-preferred partner	LPP	tr|A0A087WZF1|A0A087WZF1_HUMAN Lipoma-preferred partner OS=Homo sapiens OX=9606 GN=LPP PE=1 SV=1;sp|Q93052|LPP_HUMAN Lipoma-preferred partner OS=Homo sapiens OX=9606 GN=LPP PE=1 SV=1;tr|C9JXK9|C9JXK9_HUMAN Lipoma-preferred partner (Fragment) OS=Homo sapien	TRUE	4	2	2	2	1	0	1	1	0	1	1	0	1	4.9	4.9	4.9	63.382	590	590;612;252;428	0.0041309	2.1221	By MS/MS		By MS/MS	NaN	NaN	NaN	0	0	Median	NaN	NaN	NaN	0	0	Median	NaN	NaN	NaN	0	0
C9JHF5;A0A0A0MS29;Q9GZY8	C9JHF5;A0A0A0MS29;Q9GZY8	2;2;2	2;2;2	2;2;2	Mitochondrial fission factor	MFF	tr|C9JHF5|C9JHF5_HUMAN Mitochondrial fission factor (Fragment) OS=Homo sapiens OX=9606 GN=MFF PE=1 SV=1;tr|A0A0A0MS29|A0A0A0MS29_HUMAN Mitochondrial fission factor OS=Homo sapiens OX=9606 GN=MFF PE=1 SV=1;sp|Q9GZY8|MFF_HUMAN Mitochondrial fission factor OS	TRUE	3	2	2	2	2	2	2	2	2	2	2	2	2	42.8	42.8	42.8	15.627	138	138;221;342	0	9.6872	By MS/MS	By MS/MS	By MS/MS	0.53057	0.6783	33.216	6	5	Median	0.73698	0.92735	37.834	6	5	Median	1.3779	1.3828	27.522	6	5
P29590;H3BT29;H3BT57;H3BUJ5;H3BVD2	P29590;H3BT29;H3BT57;H3BUJ5	11;8;8;7;3	11;8;8;7;3	11;8;8;7;3	Protein PML	PML	sp|P29590|PML_HUMAN Protein PML OS=Homo sapiens OX=9606 GN=PML PE=1 SV=3;tr|H3BT29|H3BT29_HUMAN Protein PML (Fragment) OS=Homo sapiens OX=9606 GN=PML PE=1 SV=1;tr|H3BT57|H3BT57_HUMAN Protein PML OS=Homo sapiens OX=9606 GN=PML PE=1 SV=1;tr|H3BUJ5|H3BUJ5_HUM	TRUE	5	11	11	11	8	8	9	8	8	9	8	8	9	15.4	15.4	15.4	97.55	882	882;240;568;261;217	0	37.101	By MS/MS	By MS/MS	By MS/MS	0.41715	0.81332	38.65	24	12	Leave out requantified	0.87708	1.4986	19.578	24	12	Leave out requantified	2.002	1.8363	34.194	24	12
Q96AQ6	Q96AQ6	3	3	3	Pre-B-cell leukemia transcription factor-interacting protein 1	PBXIP1	sp|Q96AQ6|PBIP1_HUMAN Pre-B-cell leukemia transcription factor-interacting protein 1 OS=Homo sapiens OX=9606 GN=PBXIP1 PE=1 SV=1	TRUE	1	3	3	3	2	2	2	2	2	2	2	2	2	4.4	4.4	4.4	80.642	731	731	0	5.846	By MS/MS	By MS/MS	By MS/MS	0.49978	1.0232	39.531	7	6	Median	0.54899	0.99067	106.06	7	6	Median	1.1757	1.0755	95.848	7	6
Q9H4E7	Q9H4E7	4	4	4	Differentially expressed in FDCP 6 homolog	DEF6	sp|Q9H4E7|DEFI6_HUMAN Differentially expressed in FDCP 6 homolog OS=Homo sapiens OX=9606 GN=DEF6 PE=1 SV=1	TRUE	1	4	4	4	2	2	3	2	2	3	2	2	3	6.5	6.5	6.5	73.91	631	631	0	17.248	By MS/MS	By MS/MS	By MS/MS	0.50277	0.99712	33.006	7	5	Median	0.52678	0.7887	39.958	5	3	Median	0.79728	0.79945	25.42	5	3
H0YNW5;H0YKC5;P33316;H0YMM5;A0A0C4DGL3;H0YNJ9;H0YKI0;H0YMP1	H0YNW5;H0YKC5;P33316;H0YMM5;A0A0C4DGL3;H0YNJ9;H0YKI0;H0YMP1	4;4;4;3;3;3;3;2	4;4;4;3;3;3;3;2	4;4;4;3;3;3;3;2	Deoxyuridine 5-triphosphate nucleotidohydrolase, mitochondrial	DUT	tr|H0YNW5|H0YNW5_HUMAN Deoxyuridine 5-triphosphate nucleotidohydrolase, mitochondrial OS=Homo sapiens OX=9606 GN=DUT PE=1 SV=1;tr|H0YKC5|H0YKC5_HUMAN Deoxyuridine 5-triphosphate nucleotidohydrolase, mitochondrial (Fragment) OS=Homo sapiens OX=9606 GN=DUT	TRUE	8	4	4	4	4	4	1	4	4	1	4	4	1	33.5	33.5	33.5	17.827	167	167;221;252;133;141;143;226;107	0	24.121	By MS/MS	By MS/MS	By MS/MS	0.46576	0.91086	27.188	10	9	Median	0.42424	0.86094	44.264	10	9	Median	0.82644	0.8617	36.657	10	9
A0A2R8YEL6;P48506;B4E2I4;E1CEI4;A0A0C4DGB2;A0A2R8Y648;D6RGF8	A0A2R8YEL6;P48506;B4E2I4;E1CEI4;A0A0C4DGB2	9;9;8;8;6;3;1	9;9;8;8;6;3;1	9;9;8;8;6;3;1	Glutamate--cysteine ligase catalytic subunit	GCLC	tr|A0A2R8YEL6|A0A2R8YEL6_HUMAN Glutamate--cysteine ligase catalytic subunit (Fragment) OS=Homo sapiens OX=9606 GN=GCLC PE=1 SV=1;sp|P48506|GSH1_HUMAN Glutamate--cysteine ligase catalytic subunit OS=Homo sapiens OX=9606 GN=GCLC PE=1 SV=2;tr|B4E2I4|B4E2I4_HU	TRUE	7	9	9	9	5	5	7	5	5	7	5	5	7	16.1	16.1	16.1	72.931	639	639;637;584;599;252;361;54	0	28.29	By MS/MS	By MS/MS	By MS/MS	0.77581	1.2731	12.325	17	9	Leave out requantified	0.61538	1.027	25.705	17	9	Leave out requantified	0.78952	0.76267	29.689	17	9
Q96RP9;C9IZ01;F8WAU4	Q96RP9;C9IZ01;F8WAU4	7;6;5	7;6;5	7;6;5	Elongation factor G, mitochondrial	GFM1	sp|Q96RP9|EFGM_HUMAN Elongation factor G, mitochondrial OS=Homo sapiens OX=9606 GN=GFM1 PE=1 SV=2;tr|C9IZ01|C9IZ01_HUMAN Elongation factor G, mitochondrial OS=Homo sapiens OX=9606 GN=GFM1 PE=1 SV=1;tr|F8WAU4|F8WAU4_HUMAN Elongation factor G, mitochondrial	TRUE	3	7	7	7	4	6	4	4	6	4	4	6	4	15	15	15	83.471	751	751;591;453	0	18.678	By MS/MS	By MS/MS	By MS/MS	0.72117	1.2621	26.602	15	7	Leave out requantified	0.54872	0.87063	23.328	15	7	Leave out requantified	0.75399	0.70665	19.024	15	7
A0A087X0H9;U3KPZ7;Q5T8P6;Q9P2N5	A0A087X0H9;U3KPZ7;Q5T8P6;Q9P2N5	1;1;1;1	1;1;1;1	1;1;1;1	RNA-binding protein 26;RNA-binding protein 27	RBM26;RBM27	tr|A0A087X0H9|A0A087X0H9_HUMAN RNA-binding protein 26 OS=Homo sapiens OX=9606 GN=RBM26 PE=1 SV=1;tr|U3KPZ7|U3KPZ7_HUMAN Uncharacterized protein OS=Homo sapiens OX=9606 PE=4 SV=1;sp|Q5T8P6|RBM26_HUMAN RNA-binding protein 26 OS=Homo sapiens OX=9606 GN=RBM26	TRUE	4	1	1	1	0	1	0	0	1	0	0	1	0	1.2	1.2	1.2	113.79	1009	1009;1027;1007;1060	0.0047214	2.0455		By MS/MS		NaN	NaN	NaN	1	1	Median	NaN	NaN	NaN	1	1	Median	NaN	NaN	NaN	1	1
A0A087X0R6;Q9UMY4	A0A087X0R6;Q9UMY4	3;3	2;2	2;2	Sorting nexin-12	SNX12	tr|A0A087X0R6|A0A087X0R6_HUMAN Sorting nexin-12 OS=Homo sapiens OX=9606 GN=SNX12 PE=1 SV=1;sp|Q9UMY4|SNX12_HUMAN Sorting nexin-12 OS=Homo sapiens OX=9606 GN=SNX12 PE=1 SV=3	TRUE	2	3	2	2	2	2	1	1	1	0	1	1	0	20.3	15.1	15.1	19.825	172	172;172	0	3.6341	By MS/MS	By MS/MS	By matching	0.63274	1.1496	7.0758	2	1	Median	0.49276	0.89381	48.955	2	1	Median	0.68173	0.69821	38.816	2	1
P05976;P08590	P05976;P08590	2;2	2;2	2;2	Myosin light chain 1/3, skeletal muscle isoform;Myosin light chain 3	MYL1;MYL3	sp|P05976|MYL1_HUMAN Myosin light chain 1/3, skeletal muscle isoform OS=Homo sapiens OX=9606 GN=MYL1 PE=2 SV=3;sp|P08590|MYL3_HUMAN Myosin light chain 3 OS=Homo sapiens OX=9606 GN=MYL3 PE=1 SV=3	TRUE	2	2	2	2	2	2	2	2	2	2	2	2	2	8.2	8.2	8.2	21.145	194	194;195	0	17.555	By MS/MS	By MS/MS	By MS/MS	0.54413	0.97962	8.7122	9	2	Leave out requantified	0.56711	0.93629	9.065	9	2	Leave out requantified	0.99747	0.94654	9.8881	9	2
Q03518;A0A140T9T7;A0A0S2Z4R8	Q03518;A0A140T9T7	14;14;4	14;14;4	14;14;4	Antigen peptide transporter 1	TAP1	sp|Q03518|TAP1_HUMAN Antigen peptide transporter 1 OS=Homo sapiens OX=9606 GN=TAP1 PE=1 SV=2;tr|A0A140T9T7|A0A140T9T7_HUMAN Antigen peptide transporter 1 OS=Homo sapiens OX=9606 GN=TAP1 PE=1 SV=1	TRUE	3	14	14	14	12	14	11	12	14	11	12	14	11	30.2	30.2	30.2	87.217	808	808;808;323	0	242.85	By MS/MS	By MS/MS	By MS/MS	0.50669	0.97215	14.373	45	20	Leave out requantified	0.90893	1.7653	5.4593	45	20	Leave out requantified	1.7909	1.7619	14.161	45	20
Q15084	Q15084	19	19	19	Protein disulfide-isomerase A6	PDIA6	sp|Q15084|PDIA6_HUMAN Protein disulfide-isomerase A6 OS=Homo sapiens OX=9606 GN=PDIA6 PE=1 SV=1	TRUE	1	19	19	19	17	16	19	17	16	19	17	16	19	43.4	43.4	43.4	48.121	440	440	0	202.42	By MS/MS	By MS/MS	By MS/MS	0.55326	0.90343	17.509	62	14	Leave out requantified	0.72652	0.9812	15.944	62	14	Leave out requantified	1.2629	1.1339	14.46	62	14
A0A087X0W9;Q8N6M0	A0A087X0W9;Q8N6M0	1;1	1;1	1;1	OTU domain-containing protein 6B	OTUD6B	tr|A0A087X0W9|A0A087X0W9_HUMAN Deubiquitinase OTUD6B OS=Homo sapiens OX=9606 GN=OTUD6B PE=1 SV=1;sp|Q8N6M0|OTU6B_HUMAN Deubiquitinase OTUD6B OS=Homo sapiens OX=9606 GN=OTUD6B PE=1 SV=1	TRUE	2	1	1	1	1	1	1	1	1	1	1	1	1	4	4	4	37.325	323	323;293	0.0010377	2.98	By MS/MS	By MS/MS	By MS/MS	0.42403	0.81346	14.927	3	3	Median	0.54378	1.1869	42.484	3	3	Plateau	1.5459	1.6326	30.811	3	3
Q9BZF1;F8VQX7;F8VUA7;F8VVD3;F8VVE7;F8VZ43	Q9BZF1;F8VQX7;F8VUA7	7;6;5;1;1;1	7;6;5;1;1;1	7;6;5;1;1;1	Oxysterol-binding protein-related protein 8;Oxysterol-binding protein	OSBPL8	sp|Q9BZF1|OSBL8_HUMAN Oxysterol-binding protein-related protein 8 OS=Homo sapiens OX=9606 GN=OSBPL8 PE=1 SV=3;tr|F8VQX7|F8VQX7_HUMAN Oxysterol-binding protein (Fragment) OS=Homo sapiens OX=9606 GN=OSBPL8 PE=1 SV=1;tr|F8VUA7|F8VUA7_HUMAN Oxysterol-binding p	TRUE	6	7	7	7	5	6	5	5	6	5	5	6	5	11.6	11.6	11.6	101.19	889	889;721;694;76;111;157	0	33.262	By MS/MS	By MS/MS	By MS/MS	0.7375	1.3626	21.236	14	2	Leave out requantified	0.90768	1.3325	50.319	14	2	Leave out requantified	1.3177	1.2139	53.824	14	2
Q9NXF1	Q9NXF1	2	2	2	Testis-expressed sequence 10 protein	TEX10	sp|Q9NXF1|TEX10_HUMAN Testis-expressed protein 10 OS=Homo sapiens OX=9606 GN=TEX10 PE=1 SV=2	TRUE	1	2	2	2	2	2	1	2	2	1	2	2	1	3.3	3.3	3.3	105.67	929	929	0	7.0366	By MS/MS	By MS/MS	By MS/MS	0.53569	0.76314	9.658	5	2	Median	0.66772	0.87687	13.825	5	2	Median	1.2733	1.1523	13.751	5	2
A0A087X1A5;Q5JW30;O95793	A0A087X1A5;Q5JW30;O95793	1;1;1	1;1;1	1;1;1	Double-stranded RNA-binding protein Staufen homolog 1	STAU1	tr|A0A087X1A5|A0A087X1A5_HUMAN Double-stranded RNA-binding protein Staufen homolog 1 OS=Homo sapiens OX=9606 GN=STAU1 PE=1 SV=1;tr|Q5JW30|Q5JW30_HUMAN Double-stranded RNA-binding protein Staufen homolog 1 OS=Homo sapiens OX=9606 GN=STAU1 PE=1 SV=1;sp|O9579	TRUE	3	1	1	1	0	1	0	0	1	0	0	1	0	2.8	2.8	2.8	54.945	493	493;494;577	0	3.7083		By MS/MS		0.65416	1.3917	6.4677	2	2	Median	0.50809	1.1081	11.817	2	2	Median	0.7767	0.82056	5.7976	2	2
Q53G44;H7C1K6	Q53G44;H7C1K6	3;2	3;2	3;2	Interferon-induced protein 44-like	IFI44L	sp|Q53G44|IF44L_HUMAN Interferon-induced protein 44-like OS=Homo sapiens OX=9606 GN=IFI44L PE=2 SV=3;tr|H7C1K6|H7C1K6_HUMAN Interferon-induced protein 44-like (Fragment) OS=Homo sapiens OX=9606 GN=IFI44L PE=1 SV=1	TRUE	2	3	3	3	2	2	3	2	2	3	2	2	3	10.4	10.4	10.4	51.322	452	452;232	0	34.383	By MS/MS	By MS/MS	By MS/MS	0.75654	1.2499	28.559	8	7	Median	3.4847	5.7629	29.809	8	7	Median	4.9772	4.8168	24.138	8	7
Q99436	Q99436	4	4	4	Proteasome subunit beta type-7	PSMB7	sp|Q99436|PSB7_HUMAN Proteasome subunit beta type-7 OS=Homo sapiens OX=9606 GN=PSMB7 PE=1 SV=1	TRUE	1	4	4	4	2	3	2	2	3	2	2	3	2	14.8	14.8	14.8	29.965	277	277	0	9.1033	By MS/MS	By MS/MS	By MS/MS	0.51372	0.88745	29.658	6	0	Leave out requantified	0.66311	0.85387	16.826	6	0	Leave out requantified	1.4078	1.2291	36.155	6	0
A0A0J9YX89;A0A087X1G7;O60613	A0A0J9YX89;A0A087X1G7;O60613	1;1;1	1;1;1	1;1;1	15 kDa selenoprotein	2022-09-15	tr|A0A0J9YX89|A0A0J9YX89_HUMAN Selenoprotein F (Fragment) OS=Homo sapiens OX=9606 GN=SELENOF PE=1 SV=1;tr|A0A087X1G7|A0A087X1G7_HUMAN Selenoprotein F OS=Homo sapiens OX=9606 GN=SELENOF PE=1 SV=1;sp|O60613|SEP15_HUMAN Selenoprotein F OS=Homo sapiens OX=9606	TRUE	3	1	1	1	1	1	0	1	1	0	1	1	0	18.2	18.2	18.2	10.186	88	88;164;165	0	6.0434	By MS/MS	By MS/MS		0.74147	1.1123	14.282	2	0	Median	0.74218	1.0302	18.431	2	0	Median	0.93861	0.8867	10.27	2	0
J3KQV6;J3QT67;J3QT66;J3QT69;J3QT50;J3QT43;J3QT95;A0A087X1P5;J3KQ41;Q9H9Q2	J3KQV6;J3QT67;J3QT66;J3QT69;J3QT50;J3QT43;J3QT95;A0A087X1P5;J3KQ41;Q9H9Q2	1;1;1;1;1;1;1;1;1;1	1;1;1;1;1;1;1;1;1;1	1;1;1;1;1;1;1;1;1;1	COP9 signalosome complex subunit 7b	COPS7B	tr|J3KQV6|J3KQV6_HUMAN COP9 signalosome complex subunit 7b OS=Homo sapiens OX=9606 GN=COPS7B PE=1 SV=1;tr|J3QT67|J3QT67_HUMAN COP9 signalosome complex subunit 7b OS=Homo sapiens OX=9606 GN=COPS7B PE=1 SV=1;tr|J3QT66|J3QT66_HUMAN COP9 signalosome complex su	TRUE	10	1	1	1	1	0	0	1	0	0	1	0	0	35.2	35.2	35.2	5.6764	54	54;62;62;68;78;103;150;209;278;264	0.00036114	3.5084	By MS/MS			NaN	NaN	NaN	1	0	Median	NaN	NaN	NaN	1	0	Median	NaN	NaN	NaN	1	0
P13073;H3BN72;H3BNV9;Q86WV2;H3BPG0;H3BNI5	P13073;H3BN72;H3BNV9;Q86WV2;H3BPG0	6;5;5;4;3;2	6;5;5;4;3;2	6;5;5;4;3;2	Cytochrome c oxidase subunit 4 isoform 1, mitochondrial	COX4I1	sp|P13073|COX41_HUMAN Cytochrome c oxidase subunit 4 isoform 1, mitochondrial OS=Homo sapiens OX=9606 GN=COX4I1 PE=1 SV=1;tr|H3BN72|H3BN72_HUMAN Cytochrome c oxidase subunit 4 isoform 1, mitochondrial OS=Homo sapiens OX=9606 GN=COX4I1 PE=1 SV=1;tr|H3BNV9|H	TRUE	6	6	6	6	5	4	4	5	4	4	5	4	4	31.4	31.4	31.4	19.576	169	169;126;139;83;108;43	0	13.291	By MS/MS	By MS/MS	By MS/MS	0.42816	0.79681	29.591	14	3	Leave out requantified	0.4598	0.70923	33.666	14	3	Leave out requantified	0.98683	0.92164	7.3207	14	3
R9WNI0;A8MQB8;G3V0J0;Q06787;A0A087WXI3;A0A087WWR6;Q8IXW7;P51116	R9WNI0;A8MQB8;G3V0J0;Q06787;A0A087WXI3	3;3;3;3;2;1;1;1	3;3;3;3;2;1;1;1	2;2;2;2;2;1;1;0	Fragile X mental retardation protein 1	FMR1	tr|R9WNI0|R9WNI0_HUMAN Fragile X mental retardation 1 OS=Homo sapiens OX=9606 GN=FMR1 PE=1 SV=1;tr|A8MQB8|A8MQB8_HUMAN Synaptic functional regulator FMR1 OS=Homo sapiens OX=9606 GN=FMR1 PE=1 SV=1;tr|G3V0J0|G3V0J0_HUMAN Fragile X mental retardation 1, isofo	TRUE	8	3	3	2	2	2	3	2	2	3	1	1	2	5.5	5.5	4	61.515	544	544;582;592;632;419;102;297;673	0	6.3601	By MS/MS	By MS/MS	By MS/MS	0.51049	1.0327	45.165	9	9	Median	0.59375	1.2057	42.475	9	9	Median	1.1595	1.1338	18.338	9	9
P63172	P63172	2	2	2	Dynein light chain Tctex-type 1	DYNLT1	sp|P63172|DYLT1_HUMAN Dynein light chain Tctex-type 1 OS=Homo sapiens OX=9606 GN=DYNLT1 PE=1 SV=1	TRUE	1	2	2	2	2	1	1	2	1	1	2	1	1	30.1	30.1	30.1	12.452	113	113	0	14.142	By MS/MS	By MS/MS	By MS/MS	0.65067	0.93084	46.858	5	0	Leave out requantified	0.68771	0.87373	10.363	5	0	Leave out requantified	0.96212	0.80824	37.007	5	0
Q96C23;H7C320;B8ZZ75;H7C1B5	Q96C23;H7C320	7;4;3;3	7;4;3;3	7;4;3;3	Aldose 1-epimerase	GALM	sp|Q96C23|GALM_HUMAN Aldose 1-epimerase OS=Homo sapiens OX=9606 GN=GALM PE=1 SV=1;tr|H7C320|H7C320_HUMAN Aldose 1-epimerase (Fragment) OS=Homo sapiens OX=9606 GN=GALM PE=1 SV=1	TRUE	4	7	7	7	4	3	6	4	3	6	4	3	6	26.9	26.9	26.9	37.765	342	342;194;194;218	0	25.137	By MS/MS	By MS/MS	By MS/MS	0.7208	1.1793	28.555	16	11	Leave out requantified	0.59457	1.1766	6.4419	16	11	Leave out requantified	1.2379	1.1865	32.018	16	11
A0A087X279;P09913	A0A087X279;P09913	3;3	3;3	3;3	Interferon-induced protein with tetratricopeptide repeats 2	IFIT2	tr|A0A087X279|A0A087X279_HUMAN Interferon-induced protein with tetratricopeptide repeats 2 OS=Homo sapiens OX=9606 GN=IFIT2 PE=1 SV=1;sp|P09913|IFIT2_HUMAN Interferon-induced protein with tetratricopeptide repeats 2 OS=Homo sapiens OX=9606 GN=IFIT2 PE=1 SV	TRUE	2	3	3	3	0	1	3	0	1	3	0	1	3	8.9	8.9	8.9	55.984	483	483;472	0	7.7232		By MS/MS	By MS/MS	1.5733	2.3966	52.559	4	1	Median	2.2685	2.9257	64.025	4	1	Median	1.1498	1.0495	23.178	4	1
P22732	P22732	3	3	3	Solute carrier family 2, facilitated glucose transporter member 5	SLC2A5	sp|P22732|GTR5_HUMAN Solute carrier family 2, facilitated glucose transporter member 5 OS=Homo sapiens OX=9606 GN=SLC2A5 PE=1 SV=1	TRUE	1	3	3	3	1	1	2	1	1	2	1	1	2	7.8	7.8	7.8	54.973	501	501	0	5.3413	By MS/MS	By MS/MS	By MS/MS	0.45749	0.73579	28.258	5	5	Median	0.52848	0.73476	18.752	5	5	Median	1.0512	0.98826	22.459	5	5
A0A087WXC5;E7ESZ7;O95299;Q8N1B9;C9J6X0	A0A087WXC5;E7ESZ7;O95299;Q8N1B9;C9J6X0	2;2;2;1;1	2;2;2;1;1	2;2;2;1;1	NADH dehydrogenase [ubiquinone] 1 alpha subcomplex subunit 10, mitochondrial	NDUFA10	tr|A0A087WXC5|A0A087WXC5_HUMAN NADH dehydrogenase [ubiquinone] 1 alpha subcomplex subunit 10, mitochondrial OS=Homo sapiens OX=9606 GN=NDUFA10 PE=1 SV=1;tr|E7ESZ7|E7ESZ7_HUMAN NADH dehydrogenase [ubiquinone] 1 alpha subcomplex subunit 10, mitochondrial OS=	TRUE	5	2	2	2	2	2	2	2	2	2	2	2	2	10.4	10.4	10.4	40.836	355	355;390;355;201;244	0	30.077	By MS/MS	By MS/MS	By MS/MS	0.438	0.74531	41.37	7	3	Leave out requantified	0.65951	1.0325	11.198	7	3	Leave out requantified	1.1131	1.0505	20.206	7	3
Q9NT62;F8WDI0	Q9NT62	6;2	6;2	6;2	Ubiquitin-like-conjugating enzyme ATG3	ATG3	sp|Q9NT62|ATG3_HUMAN Ubiquitin-like-conjugating enzyme ATG3 OS=Homo sapiens OX=9606 GN=ATG3 PE=1 SV=1	TRUE	2	6	6	6	5	3	5	5	3	5	5	3	5	22.3	22.3	22.3	35.864	314	314;74	0	28.171	By MS/MS	By MS/MS	By MS/MS	0.54134	1.0725	24.156	16	13	Leave out requantified	0.67767	1.1323	10.374	16	13	Leave out requantified	1.2147	1.11	5.2291	16	13
P25098;P35626;Q8N433;E9PRV7	P25098	5;2;1;1	5;2;1;1	5;2;1;1	Beta-adrenergic receptor kinase 1	ADRBK1	sp|P25098|ARBK1_HUMAN Beta-adrenergic receptor kinase 1 OS=Homo sapiens OX=9606 GN=GRK2 PE=1 SV=2	TRUE	4	5	5	5	2	5	2	2	5	2	2	5	2	7.4	7.4	7.4	79.573	689	689;688;387;408	0	11.881	By MS/MS	By MS/MS	By MS/MS	0.43542	0.83489	14.748	9	3	Leave out requantified	0.47018	0.99097	26.971	9	3	Leave out requantified	1.2732	1.2582	38.244	9	3
A0A096LNY7;A0A096LPD9;E7EWK1;A0A096LPK7;A0A182DWF2;D3YTF8;A0A182DWF3;Q9NNW7	A0A096LNY7;A0A096LPD9;E7EWK1;A0A096LPK7;A0A182DWF2;D3YTF8;A0A182DWF3;Q9NNW7	1;1;1;1;1;1;1;1	1;1;1;1;1;1;1;1	1;1;1;1;1;1;1;1	Thioredoxin reductase 2, mitochondrial	TXNRD2	tr|A0A096LNY7|A0A096LNY7_HUMAN Thioredoxin reductase 2, mitochondrial (Fragment) OS=Homo sapiens OX=9606 GN=TXNRD2 PE=1 SV=2;tr|A0A096LPD9|A0A096LPD9_HUMAN Thioredoxin reductase 2, mitochondrial OS=Homo sapiens OX=9606 GN=TXNRD2 PE=1 SV=1;tr|E7EWK1|E7EWK1_	TRUE	8	1	1	1	1	0	0	1	0	0	1	0	0	11.7	11.7	11.7	18.318	171	171;306;338;463;494;501;523;524	0.0091603	1.8005	By MS/MS			NaN	NaN	NaN	1	1	Median	NaN	NaN	NaN	1	1	Median	NaN	NaN	NaN	1	1
Q9Y6K5;F8VS35;F8VWK9;H0YHL3	Q9Y6K5	25;7;6;1	25;7;6;1	25;7;6;1	2-5-oligoadenylate synthase 3	OAS3	sp|Q9Y6K5|OAS3_HUMAN 2-5-oligoadenylate synthase 3 OS=Homo sapiens OX=9606 GN=OAS3 PE=1 SV=3	TRUE	4	25	25	25	19	20	20	19	20	20	19	20	20	27	27	27	121.17	1087	1087;223;177;166	0	160.33	By MS/MS	By MS/MS	By MS/MS	0.49323	0.97543	28.859	68	35	Leave out requantified	1.1757	1.8649	27.685	68	35	Leave out requantified	2.1885	2.083	14.818	68	35
F8WEI0;A0A0A0MQS1;Q53H96	F8WEI0;A0A0A0MQS1;Q53H96	1;1;1	1;1;1	1;1;1	Pyrroline-5-carboxylate reductase;Pyrroline-5-carboxylate reductase 3	PYCRL	tr|F8WEI0|F8WEI0_HUMAN Pyrroline-5-carboxylate reductase 3 OS=Homo sapiens OX=9606 GN=PYCR3 PE=1 SV=1;tr|A0A0A0MQS1|A0A0A0MQS1_HUMAN Pyrroline-5-carboxylate reductase OS=Homo sapiens OX=9606 GN=PYCR3 PE=1 SV=1;sp|Q53H96|P5CR3_HUMAN Pyrroline-5-carboxylate	TRUE	3	1	1	1	1	1	0	1	1	0	1	1	0	25	25	25	4.4491	44	44;286;274	0.0091659	1.8025	By MS/MS	By MS/MS		NaN	NaN	NaN	1	1	Median	NaN	NaN	NaN	1	1	Median	NaN	NaN	NaN	1	1
H7C1N7;H7C3V9;H7C277;A0A0A0MQU4;Q96I15	H7C1N7;H7C3V9;H7C277;A0A0A0MQU4;Q96I15	1;1;1;1;1	1;1;1;1;1	1;1;1;1;1	Selenocysteine lyase	SCLY	tr|H7C1N7|H7C1N7_HUMAN Selenocysteine lyase (Fragment) OS=Homo sapiens OX=9606 GN=SCLY PE=1 SV=1;tr|H7C3V9|H7C3V9_HUMAN Selenocysteine lyase (Fragment) OS=Homo sapiens OX=9606 GN=SCLY PE=1 SV=1;tr|H7C277|H7C277_HUMAN Selenocysteine lyase (Fragment) OS=Homo	TRUE	5	1	1	1	0	0	1	0	0	1	0	0	1	15.6	15.6	15.6	13.679	122	122;241;251;453;445	0	3.5978			By MS/MS	NaN	NaN	NaN	1	0	Median	NaN	NaN	NaN	1	0	Median	NaN	NaN	NaN	1	0
C9JP00;A0A0A0MQX8;Q9NR56;C9J4T8;O95205;B1AKI6;Q86VM6;Q9NUK0;Q5VZF2	C9JP00;A0A0A0MQX8;Q9NR56;C9J4T8;O95205;B1AKI6;Q86VM6;Q9NUK0;Q5VZF2	3;3;3;2;2;2;2;2;2	3;3;3;2;2;2;2;2;2	1;1;1;0;0;0;0;0;0	Muscleblind-like protein 1;Muscleblind-like protein 3;Muscleblind-like protein 2	MBNL1;MBLL;MBNL3;MBNL2	tr|C9JP00|C9JP00_HUMAN Muscleblind-like protein 1 OS=Homo sapiens OX=9606 GN=MBNL1 PE=1 SV=1;tr|A0A0A0MQX8|A0A0A0MQX8_HUMAN Muscleblind-like protein 1 OS=Homo sapiens OX=9606 GN=MBNL1 PE=1 SV=1;sp|Q9NR56|MBNL1_HUMAN Muscleblind-like protein 1 OS=Homo sapie	TRUE	9	3	3	1	2	1	3	2	1	3	1	1	1	7.5	7.5	3.2	37.898	348	348;400;388;58;255;342;343;354;373	0	7.327	By MS/MS	By MS/MS	By MS/MS	0.62287	0.38357	56.968	9	5	Linear	0.6639	0.96241	68	9	5	Median	0.72393	0.66638	30.541	9	5
Q92890;C9JNP9;C9IZG3;C9J6N9	Q92890;C9JNP9;C9IZG3	4;3;3;1	4;3;3;1	4;3;3;1	Ubiquitin fusion degradation protein 1 homolog	UFD1L	sp|Q92890|UFD1_HUMAN Ubiquitin recognition factor in ER-associated degradation protein 1 OS=Homo sapiens OX=9606 GN=UFD1 PE=1 SV=3;tr|C9JNP9|C9JNP9_HUMAN Ubiquitin recognition factor in ER-associated degradation protein 1 (Fragment) OS=Homo sapiens OX=9606	TRUE	4	4	4	4	2	4	3	2	4	3	2	4	3	19.5	19.5	19.5	34.5	307	307;159;190;135	0	8.8868	By MS/MS	By MS/MS	By MS/MS	0.63585	1.2667	22.153	8	6	Median	0.57572	1.0116	21.823	8	6	Median	1.013	1.0159	28.513	8	6
F8VSA6;E9PS38;S4R3E9;E9PL57;Q15843	F8VSA6;E9PS38;S4R3E9;E9PL57;Q15843	2;2;2;2;2	2;2;2;2;2	2;2;2;2;2	NEDD8	NEDD8;NEDD8-MDP1	tr|F8VSA6|F8VSA6_HUMAN NEDD8 OS=Homo sapiens OX=9606 GN=NEDD8 PE=4 SV=1;tr|E9PS38|E9PS38_HUMAN NEDD8-MDP1 readthrough OS=Homo sapiens OX=9606 GN=NEDD8-MDP1 PE=4 SV=2;tr|S4R3E9|S4R3E9_HUMAN NEDD8-MDP1 readthrough OS=Homo sapiens OX=9606 GN=NEDD8-MDP1 PE=4 S	TRUE	5	2	2	2	2	2	1	2	2	1	2	2	1	38	38	38	5.8668	50	50;67;84;170;81	0	37.19	By MS/MS	By MS/MS	By MS/MS	0.54172	0.82796	2.1611	8	0	Leave out requantified	0.77038	1.0904	29.4	8	0	Leave out requantified	1.2843	1.2099	39.772	8	0
Q13619;A0A0A0MR50;A6NE76	Q13619;A0A0A0MR50	5;5;2	5;5;2	1;1;0	Cullin-4A	CUL4A	sp|Q13619|CUL4A_HUMAN Cullin-4A OS=Homo sapiens OX=9606 GN=CUL4A PE=1 SV=3;tr|A0A0A0MR50|A0A0A0MR50_HUMAN Cullin-4A OS=Homo sapiens OX=9606 GN=CUL4A PE=1 SV=1	TRUE	3	5	5	1	2	3	5	2	3	5	0	0	1	6.3	6.3	1.6	87.679	759	759;667;234	0	12.741	By MS/MS	By MS/MS	By MS/MS	0.40983	0.72655	46.303	8	4	Leave out requantified	0.56033	0.97067	13.524	8	4	Leave out requantified	1.2007	1.1667	14.36	8	4
Q9UHA4	Q9UHA4	2	2	2	Ragulator complex protein LAMTOR3	LAMTOR3	sp|Q9UHA4|LTOR3_HUMAN Ragulator complex protein LAMTOR3 OS=Homo sapiens OX=9606 GN=LAMTOR3 PE=1 SV=1	TRUE	1	2	2	2	2	1	2	2	1	2	2	1	2	41.1	41.1	41.1	13.623	124	124	0	34.212	By MS/MS	By MS/MS	By MS/MS	0.46481	0.90668	39.889	5	0	Median	0.51501	0.75598	23.33	5	0	Leave out requantified	1.0329	0.95927	10.48	5	0
P05161;A0A096LNZ9;A0A096LPJ4	P05161;A0A096LNZ9;A0A096LPJ4	4;3;3	4;3;3	4;3;3	Ubiquitin-like protein ISG15	ISG15	sp|P05161|ISG15_HUMAN Ubiquitin-like protein ISG15 OS=Homo sapiens OX=9606 GN=ISG15 PE=1 SV=5;tr|A0A096LNZ9|A0A096LNZ9_HUMAN Ubiquitin-like protein ISG15 (Fragment) OS=Homo sapiens OX=9606 GN=ISG15 PE=1 SV=6;tr|A0A096LPJ4|A0A096LPJ4_HUMAN Ubiquitin-like pr	TRUE	3	4	4	4	4	4	4	4	4	4	4	4	4	21.8	21.8	21.8	17.887	165	165;143;157	0	7.5603	By MS/MS	By MS/MS	By MS/MS	0.62798	1.0902	14.345	14	5	Leave out requantified	1.2696	2.4698	8.8688	14	5	Leave out requantified	2.5201	2.3786	13.745	14	5
O75439;G3V0E4;F8WAZ6;F8WEA6;F8WBE1	O75439;G3V0E4	8;7;3;1;1	7;6;3;1;1	7;6;3;1;1	Mitochondrial-processing peptidase subunit beta	PMPCB	sp|O75439|MPPB_HUMAN Mitochondrial-processing peptidase subunit beta OS=Homo sapiens OX=9606 GN=PMPCB PE=1 SV=2;tr|G3V0E4|G3V0E4_HUMAN Mitochondrial-processing peptidase subunit beta OS=Homo sapiens OX=9606 GN=PMPCB PE=1 SV=1	TRUE	5	8	7	7	6	6	2	6	5	2	6	5	2	22.7	21.3	21.3	54.366	489	489;490;202;119;122	0	18.855	By MS/MS	By MS/MS	By MS/MS	0.51665	0.91514	29.24	12	10	Median	0.51338	0.79829	25.468	12	10	Median	0.93751	0.9087	32.346	12	10
A0A0A0MRJ9;A0A0A0MRJ8;Q7Z6I6	A0A0A0MRJ9;A0A0A0MRJ8;Q7Z6I6	2;2;2	2;2;2	1;1;1	Rho GTPase-activating protein 30	ARHGAP30	tr|A0A0A0MRJ9|A0A0A0MRJ9_HUMAN Rho GTPase-activating protein 30 OS=Homo sapiens OX=9606 GN=ARHGAP30 PE=1 SV=1;tr|A0A0A0MRJ8|A0A0A0MRJ8_HUMAN Rho GTPase-activating protein 30 OS=Homo sapiens OX=9606 GN=ARHGAP30 PE=1 SV=1;sp|Q7Z6I6|RHG30_HUMAN Rho GTPase-act	TRUE	3	2	2	1	2	1	1	2	1	1	1	1	1	2.1	2.1	1.3	95.527	890	890;924;1101	0	7.6764	By MS/MS	By MS/MS	By MS/MS	0.56528	1.1567	12.116	3	0	Median	0.63342	1.3692	4.2802	3	0	Plateau	1.2659	1.144	10.761	3	0
H3BR35;P15170;Q8IYD1;H3BSV8	H3BR35;P15170;Q8IYD1	5;5;4;2	5;5;4;2	5;5;4;2	Eukaryotic peptide chain release factor GTP-binding subunit ERF3A;Eukaryotic peptide chain release factor GTP-binding subunit ERF3B	GSPT1;GSPT2	tr|H3BR35|H3BR35_HUMAN Eukaryotic peptide chain release factor GTP-binding subunit ERF3A (Fragment) OS=Homo sapiens OX=9606 GN=GSPT1 PE=1 SV=1;sp|P15170|ERF3A_HUMAN Eukaryotic peptide chain release factor GTP-binding subunit ERF3A OS=Homo sapiens OX=9606 G	TRUE	4	5	5	5	3	5	2	3	5	2	3	5	2	11.8	11.8	11.8	52.832	475	475;499;628;199	0	10.249	By MS/MS	By MS/MS	By MS/MS	0.55053	0.85532	9.4685	10	4	Leave out requantified	0.75314	0.96664	3.3008	10	4	Leave out requantified	1.4176	1.2115	18.753	10	4
S4R402;S4R341;S4R349;A0A0A0MRM9;Q14978	S4R402;S4R341;S4R349;A0A0A0MRM9;Q14978	1;1;1;1;1	1;1;1;1;1	1;1;1;1;1	Nucleolar and coiled-body phosphoprotein 1	NOLC1	tr|S4R402|S4R402_HUMAN Nucleolar and coiled-body phosphoprotein 1 OS=Homo sapiens OX=9606 GN=NOLC1 PE=1 SV=1;tr|S4R341|S4R341_HUMAN Nucleolar and coiled-body phosphoprotein 1 OS=Homo sapiens OX=9606 GN=NOLC1 PE=1 SV=1;tr|S4R349|S4R349_HUMAN Nucleolar and c	TRUE	5	1	1	1	0	1	0	0	1	0	0	1	0	32.6	32.6	32.6	5.0538	46	46;73;258;708;699	0.0010457	3.0581		By MS/MS		0.44429	0.68155	8.6434	2	1	Median	0.52595	0.78991	22.874	2	1	Median	1.1053	1.1385	3.3313	2	1
A0A0A0MRN7;Q6YP21	A0A0A0MRN7;Q6YP21	3;3	3;3	3;3	Kynurenine--oxoglutarate transaminase 3	CCBL2	tr|A0A0A0MRN7|A0A0A0MRN7_HUMAN Kynurenine--oxoglutarate transaminase 3 (Fragment) OS=Homo sapiens OX=9606 GN=KYAT3 PE=1 SV=1;sp|Q6YP21|KAT3_HUMAN Kynurenine--oxoglutarate transaminase 3 OS=Homo sapiens OX=9606 GN=KYAT3 PE=1 SV=1	TRUE	2	3	3	3	1	2	3	1	2	3	1	2	3	14.1	14.1	14.1	29.471	262	262;454	0	7.4352	By MS/MS	By MS/MS	By MS/MS	0.96236	1.8587	38.96	3	2	Plateau	0.78251	1.2472	33.416	2	1	Median	1.4713	1.3397	29.507	2	1
A0A0A0MRR7;P09234	A0A0A0MRR7;P09234	1;1	1;1	1;1	U1 small nuclear ribonucleoprotein C	SNRPC	tr|A0A0A0MRR7|A0A0A0MRR7_HUMAN U1 small nuclear ribonucleoprotein C OS=Homo sapiens OX=9606 GN=SNRPC PE=1 SV=1;sp|P09234|RU1C_HUMAN U1 small nuclear ribonucleoprotein C OS=Homo sapiens OX=9606 GN=SNRPC PE=1 SV=1	TRUE	2	1	1	1	0	1	0	0	1	0	0	1	0	6.7	6.7	6.7	19.687	180	180;159	0.0073983	1.8601		By MS/MS		NaN	NaN	NaN	1	1	Median	NaN	NaN	NaN	1	1	Median	NaN	NaN	NaN	1	1
A0A0G2JKZ1;A2AB90;A0A0G2JH37;A0A0A0MSV9;O15533;A0A0A0MT98;Q6P1N7;C9JA35	A0A0G2JKZ1;A2AB90;A0A0G2JH37;A0A0A0MSV9;O15533;A0A0A0MT98	4;4;4;4;4;3;1;1	4;4;4;4;4;3;1;1	4;4;4;4;4;3;1;1	Tapasin	TAPBP	tr|A0A0G2JKZ1|A0A0G2JKZ1_HUMAN Tapasin OS=Homo sapiens OX=9606 GN=TAPBP PE=1 SV=1;tr|A2AB90|A2AB90_HUMAN Tapasin OS=Homo sapiens OX=9606 GN=TAPBP PE=1 SV=1;tr|A0A0G2JH37|A0A0G2JH37_HUMAN Tapasin OS=Homo sapiens OX=9606 GN=TAPBP PE=1 SV=1;tr|A0A0A0MSV9|A0A0	TRUE	8	4	4	4	3	3	4	3	3	4	3	3	4	12.5	12.5	12.5	47.606	448	448;466;466;504;448;361;156;192	0	8.719	By MS/MS	By MS/MS	By MS/MS	0.54351	1.0158	9.8282	10	0	Leave out requantified	0.96484	1.6596	7.8123	10	0	Leave out requantified	1.7028	1.5781	5.8023	10	0
P49756;E9PQU5;H0YE46	P49756;E9PQU5	6;3;1	6;3;1	6;3;1	RNA-binding protein 25	RBM25	sp|P49756|RBM25_HUMAN RNA-binding protein 25 OS=Homo sapiens OX=9606 GN=RBM25 PE=1 SV=3;tr|E9PQU5|E9PQU5_HUMAN RNA-binding protein 25 (Fragment) OS=Homo sapiens OX=9606 GN=RBM25 PE=1 SV=1	TRUE	3	6	6	6	4	5	2	4	5	2	4	5	2	9	9	9	100.18	843	843;243;73	0	12.335	By MS/MS	By MS/MS	By MS/MS	0.2395	0.49983	58.849	11	6	Leave out requantified	0.4592	0.95194	86.713	11	6	Leave out requantified	1.2032	1.0456	47.492	11	6
E7EQ01;E7EVN1;E7ETB7;E7EQ06;A0A0A0MS31;Q14790	E7EQ01;E7EVN1;E7ETB7;E7EQ06;A0A0A0MS31;Q14790	2;2;2;2;2;2	2;2;2;2;2;2	2;2;2;2;2;2	Caspase-8;Caspase-8 subunit p18;Caspase-8 subunit p10	CASP8	tr|E7EQ01|E7EQ01_HUMAN Caspase-8 (Fragment) OS=Homo sapiens OX=9606 GN=CASP8 PE=1 SV=1;tr|E7EVN1|E7EVN1_HUMAN Caspase-8 (Fragment) OS=Homo sapiens OX=9606 GN=CASP8 PE=1 SV=1;tr|E7ETB7|E7ETB7_HUMAN Caspase-8 (Fragment) OS=Homo sapiens OX=9606 GN=CASP8 PE=1	TRUE	6	2	2	2	2	1	1	2	1	1	2	1	1	25.9	25.9	25.9	13.925	116	116;124;198;209;278;479	0	5.9576	By MS/MS	By MS/MS	By MS/MS	0.74111	1.1457	63.001	5	5	Median	0.74086	0.9823	37.772	5	5	Median	0.81123	0.77012	48.318	5	5
A0A1W2PPZ5;P23193;A0A1W2PRL9;E5RJ93;E5RIS7	A0A1W2PPZ5;P23193;A0A1W2PRL9	5;5;4;2;2	5;5;4;2;2	5;5;4;2;2	Transcription elongation factor A protein 1	TCEA1	tr|A0A1W2PPZ5|A0A1W2PPZ5_HUMAN Transcription elongation factor A protein 1 OS=Homo sapiens OX=9606 GN=TCEA1 PE=1 SV=1;sp|P23193|TCEA1_HUMAN Transcription elongation factor A protein 1 OS=Homo sapiens OX=9606 GN=TCEA1 PE=1 SV=2;tr|A0A1W2PRL9|A0A1W2PRL9_HUMA	TRUE	5	5	5	5	5	3	2	5	3	2	5	3	2	18.9	18.9	18.9	33.935	301	301;301;280;90;111	0	9.34	By MS/MS	By MS/MS	By MS/MS	0.44354	0.86566	14.283	10	4	Leave out requantified	0.3758	0.70845	14.754	10	4	Leave out requantified	0.98386	0.94277	25.894	10	4
A0A0A0MS51;A0A0A0MT01;P06396;CON__Q3SX14;A0A0U1RQL8;REV__H0YJM7;REV__Q6TDU7;REV__F8W8F9	A0A0A0MS51;A0A0A0MT01;P06396;CON__Q3SX14	45;45;45;26;9;1;1;1	45;45;45;26;9;1;1;1	29;29;29;15;0;1;1;1	Gelsolin	GSN	tr|A0A0A0MS51|A0A0A0MS51_HUMAN Gelsolin OS=Homo sapiens OX=9606 GN=GSN PE=1 SV=1;tr|A0A0A0MT01|A0A0A0MT01_HUMAN Gelsolin OS=Homo sapiens OX=9606 GN=GSN PE=1 SV=1;sp|P06396|GELS_HUMAN Gelsolin OS=Homo sapiens OX=9606 GN=GSN PE=1 SV=1;	TRUE	8	45	45	29	40	42	40	40	42	40	27	29	27	53.2	53.2	38	82.525	748	748;767;782;781;232;548;716;722	0	323.31	By MS/MS	By MS/MS	By MS/MS	0.71642	1.0638	20.25	200	26	Leave out requantified	0.69978	0.91687	24.095	198	24	Leave out requantified	0.8945	0.87633	17.264	198	24
A0A0U1RQK7;A0A0A0MSA7;O43432	A0A0U1RQK7;A0A0A0MSA7;O43432	2;2;2	1;1;1	1;1;1	Eukaryotic translation initiation factor 4 gamma 3	EIF4G3	tr|A0A0U1RQK7|A0A0U1RQK7_HUMAN Eukaryotic translation initiation factor 4 gamma 3 OS=Homo sapiens OX=9606 GN=EIF4G3 PE=1 SV=1;tr|A0A0A0MSA7|A0A0A0MSA7_HUMAN Eukaryotic translation initiation factor 4 gamma 3 OS=Homo sapiens OX=9606 GN=EIF4G3 PE=1 SV=1;sp|O	TRUE	3	2	1	1	2	1	2	1	0	1	1	0	1	1.1	0.6	0.6	195.27	1774	1774;1621;1585	0.0073869	1.8469	By MS/MS	By matching	By MS/MS	NaN	NaN	NaN	1	1	Median	NaN	NaN	NaN	1	1	Median	NaN	NaN	NaN	1	1
O14880;Q5VV89;Q5VV87	O14880;Q5VV89;Q5VV87	4;4;2	4;4;2	4;4;2	Microsomal glutathione S-transferase 3	MGST3	sp|O14880|MGST3_HUMAN Microsomal glutathione S-transferase 3 OS=Homo sapiens OX=9606 GN=MGST3 PE=1 SV=1;tr|Q5VV89|Q5VV89_HUMAN Microsomal glutathione S-transferase 3 OS=Homo sapiens OX=9606 GN=MGST3 PE=1 SV=1;tr|Q5VV87|Q5VV87_HUMAN Microsomal glutathione S	TRUE	3	4	4	4	4	4	3	4	4	3	4	4	3	34.9	34.9	34.9	16.516	152	152;166;129	0	27.822	By MS/MS	By MS/MS	By MS/MS	0.49013	0.92807	12.087	11	0	Leave out requantified	0.58069	0.95401	15.658	11	0	Leave out requantified	1.1236	1.0652	3.7417	11	0
A0A0A0MSI3;Q96BW5	A0A0A0MSI3;Q96BW5	1;1	1;1	1;1	Phosphotriesterase-related protein	PTER	tr|A0A0A0MSI3|A0A0A0MSI3_HUMAN Phosphotriesterase-related protein OS=Homo sapiens OX=9606 GN=PTER PE=1 SV=1;sp|Q96BW5|PTER_HUMAN Phosphotriesterase-related protein OS=Homo sapiens OX=9606 GN=PTER PE=1 SV=1	TRUE	2	1	1	1	1	1	1	1	1	1	1	1	1	5.5	5.5	5.5	22.591	200	200;349	0.0065482	1.9417	By MS/MS	By MS/MS	By MS/MS	0.66003	1.0544	12.377	3	1	Median	0.9213	1.222	15.221	3	1	Median	1.418	1.2365	1.5268	3	1
Q9H6T3	Q9H6T3	5	5	5	RNA polymerase II-associated protein 3	RPAP3	sp|Q9H6T3|RPAP3_HUMAN RNA polymerase II-associated protein 3 OS=Homo sapiens OX=9606 GN=RPAP3 PE=1 SV=2	TRUE	1	5	5	5	3	4	3	3	4	3	3	4	3	11	11	11	75.718	665	665	0	19.658	By MS/MS	By MS/MS	By MS/MS	0.78765	1.3724	22.514	9	2	Leave out requantified	0.78564	1.1571	33.073	10	2	Leave out requantified	0.92173	0.87213	18.524	8	2
P04083;Q5T3N1;Q5T3N0	P04083;Q5T3N1	26;15;9	26;15;9	26;15;9	Annexin A1;Annexin	ANXA1	sp|P04083|ANXA1_HUMAN Annexin A1 OS=Homo sapiens OX=9606 GN=ANXA1 PE=1 SV=2;tr|Q5T3N1|Q5T3N1_HUMAN Annexin (Fragment) OS=Homo sapiens OX=9606 GN=ANXA1 PE=1 SV=1	TRUE	3	26	26	26	22	23	23	22	23	23	22	23	23	61.6	61.6	61.6	38.714	346	346;204;115	0	323.31	By MS/MS	By MS/MS	By MS/MS	0.54716	0.89621	14.237	100	24	Leave out requantified	0.4907	0.7365	14.758	100	24	Leave out requantified	0.90018	0.85762	7.5987	100	24
A0A0A0MSQ0;P13797;C9JAM8;H7C4N2	A0A0A0MSQ0;P13797	6;6;2;1	1;1;1;1	0;0;0;0	Plastin-3	PLS3	tr|A0A0A0MSQ0|A0A0A0MSQ0_HUMAN Plastin-3 OS=Homo sapiens OX=9606 GN=PLS3 PE=1 SV=1;sp|P13797|PLST_HUMAN Plastin-3 OS=Homo sapiens OX=9606 GN=PLS3 PE=1 SV=4	TRUE	4	6	1	0	5	6	6	1	1	1	0	0	0	10.4	1.9	0	69.334	617	617;630;266;190	0.0013559	2.7695	By MS/MS	By MS/MS	By MS/MS	1.0935	1.5105	26.725	3	2	Median	1.6633	2.1923	19.92	3	2	Median	1.817	1.6942	35.858	3	2
C9JRP1;A0A0A0MST8;E9PFN4;Q9Y6M7;H7C3C4	C9JRP1;A0A0A0MST8;E9PFN4;Q9Y6M7;H7C3C4	3;3;3;3;2	3;3;3;3;2	3;3;3;3;2	Anion exchange protein;Sodium bicarbonate cotransporter 3	SLC4A7	tr|C9JRP1|C9JRP1_HUMAN Anion exchange protein (Fragment) OS=Homo sapiens OX=9606 GN=SLC4A7 PE=1 SV=1;tr|A0A0A0MST8|A0A0A0MST8_HUMAN Anion exchange protein OS=Homo sapiens OX=9606 GN=SLC4A7 PE=1 SV=1;tr|E9PFN4|E9PFN4_HUMAN Anion exchange protein OS=Homo sap	TRUE	5	3	3	3	3	1	1	3	1	1	3	1	1	4.4	4.4	4.4	118.46	1051	1051;1201;1210;1214;801	0	11.595	By MS/MS	By MS/MS	By MS/MS	0.92569	1.4451	31.273	4	1	Median	1.4689	2.0249	16.986	4	1	Median	1.9312	1.8266	13.87	4	1
O43615;M0QXU7;M0R301;M0R124;M0QXM9	O43615;M0QXU7	7;6;2;2;1	7;6;2;2;1	7;6;2;2;1	Mitochondrial import inner membrane translocase subunit TIM44	TIMM44	sp|O43615|TIM44_HUMAN Mitochondrial import inner membrane translocase subunit TIM44 OS=Homo sapiens OX=9606 GN=TIMM44 PE=1 SV=2;tr|M0QXU7|M0QXU7_HUMAN Mitochondrial import inner membrane translocase subunit TIM44 (Fragment) OS=Homo sapiens OX=9606 GN=TIMM4	TRUE	5	7	7	7	7	3	4	7	3	4	7	3	4	19.7	19.7	19.7	51.355	452	452;273;126;139;133	0	25.712	By MS/MS	By MS/MS	By MS/MS	0.53807	0.93933	15.548	12	4	Leave out requantified	0.57454	0.97758	37.967	12	4	Leave out requantified	1.0667	0.98642	44.973	12	4
A0A0A0MSW3;P35658;H0YF36;E9PKD2;B7ZAV2;H0Y837	A0A0A0MSW3;P35658;H0YF36;E9PKD2;B7ZAV2;H0Y837	2;2;1;1;1;1	2;2;1;1;1;1	2;2;1;1;1;1	Nuclear pore complex protein Nup214	NUP214	tr|A0A0A0MSW3|A0A0A0MSW3_HUMAN Nuclear pore complex protein Nup214 OS=Homo sapiens OX=9606 GN=NUP214 PE=1 SV=1;sp|P35658|NU214_HUMAN Nuclear pore complex protein Nup214 OS=Homo sapiens OX=9606 GN=NUP214 PE=1 SV=2;tr|H0YF36|H0YF36_HUMAN Nuclear pore complex	TRUE	6	2	2	2	1	2	0	1	2	0	1	2	0	2.6	2.6	2.6	152.57	1519	1519;2090;140;495;916;967	0	13.508	By MS/MS	By MS/MS		0.51849	0.99795	8.2365	3	0	Median	0.35916	0.64741	13.79	3	0	Median	0.90089	0.85779	21.201	3	0
P10599	P10599	7	7	7	Thioredoxin	TXN	sp|P10599|THIO_HUMAN Thioredoxin OS=Homo sapiens OX=9606 GN=TXN PE=1 SV=3	TRUE	1	7	7	7	7	5	6	7	5	6	7	5	6	51.4	51.4	51.4	11.737	105	105	0	25.377	By MS/MS	By MS/MS	By MS/MS	0.49321	0.76638	73.647	18	5	Leave out requantified	0.63435	0.86194	6.5159	17	5	Leave out requantified	1.1674	1.092	19.831	17	5
Q14566	Q14566	15	15	15	DNA replication licensing factor MCM6	MCM6	sp|Q14566|MCM6_HUMAN DNA replication licensing factor MCM6 OS=Homo sapiens OX=9606 GN=MCM6 PE=1 SV=1	TRUE	1	15	15	15	12	11	12	12	11	12	12	11	12	21.7	21.7	21.7	92.888	821	821	0	44.226	By MS/MS	By MS/MS	By MS/MS	0.43127	0.86332	24.827	40	24	Leave out requantified	0.32456	0.57852	23.347	40	24	Leave out requantified	0.74259	0.74474	10.657	40	24
H0Y4R1;P12268;E7ETK5;C9K0R9	H0Y4R1;P12268	20;20;6;1	20;20;6;1	19;19;5;0	Inosine-5-monophosphate dehydrogenase 2	IMPDH2	tr|H0Y4R1|H0Y4R1_HUMAN Inosine-5-monophosphate dehydrogenase 2 (Fragment) OS=Homo sapiens OX=9606 GN=IMPDH2 PE=1 SV=1;sp|P12268|IMDH2_HUMAN Inosine-5-monophosphate dehydrogenase 2 OS=Homo sapiens OX=9606 GN=IMPDH2 PE=1 SV=2	TRUE	4	20	20	19	18	18	15	18	18	15	17	17	15	45.3	45.3	43.6	50.957	470	470;514;279;289	0	90.308	By MS/MS	By MS/MS	By MS/MS	0.61829	0.94482	11.477	57	23	Leave out requantified	0.79162	1.1174	23.423	57	23	Leave out requantified	1.3132	1.2181	18.862	57	23
J3KQ32;Q9NTK5;C9JTK6;C9JCJ9	J3KQ32;Q9NTK5	14;14;3;2	14;14;3;2	14;14;3;2	Obg-like ATPase 1	OLA1	tr|J3KQ32|J3KQ32_HUMAN Obg-like ATPase 1 OS=Homo sapiens OX=9606 GN=OLA1 PE=1 SV=1;sp|Q9NTK5|OLA1_HUMAN Obg-like ATPase 1 OS=Homo sapiens OX=9606 GN=OLA1 PE=1 SV=2	TRUE	4	14	14	14	13	14	12	13	14	12	13	14	12	41.8	41.8	41.8	46.937	416	416;396;116;103	0	130.83	By MS/MS	By MS/MS	By MS/MS	0.66157	0.9979	11.98	48	11	Leave out requantified	0.7238	0.96282	9.3981	48	11	Leave out requantified	1.0916	0.95644	12.716	48	11
A0A0A0MTB8;Q8NI36	A0A0A0MTB8;Q8NI36	1;1	1;1	1;1	WD repeat-containing protein 36	WDR36	tr|A0A0A0MTB8|A0A0A0MTB8_HUMAN WD repeat-containing protein 36 OS=Homo sapiens OX=9606 GN=WDR36 PE=1 SV=1;sp|Q8NI36|WDR36_HUMAN WD repeat-containing protein 36 OS=Homo sapiens OX=9606 GN=WDR36 PE=1 SV=1	TRUE	2	1	1	1	1	1	1	1	1	1	1	1	1	1.7	1.7	1.7	99.365	895	895;951	0	3.9234	By MS/MS	By MS/MS	By MS/MS	0.44718	0.88013	7.7787	3	0	Median	0.75845	1.4528	15.737	3	0	Median	1.5182	1.5147	29.694	3	0
Q9H583;Q5T3Q7;Q6P664	Q9H583;Q5T3Q7	5;5;1	5;5;1	5;5;1	HEAT repeat-containing protein 1;HEAT repeat-containing protein 1, N-terminally processed	HEATR1	sp|Q9H583|HEAT1_HUMAN HEAT repeat-containing protein 1 OS=Homo sapiens OX=9606 GN=HEATR1 PE=1 SV=3;tr|Q5T3Q7|Q5T3Q7_HUMAN HEAT repeat-containing protein 1 OS=Homo sapiens OX=9606 GN=HEATR1 PE=1 SV=1	TRUE	3	5	5	5	4	3	2	4	3	2	4	3	2	3.8	3.8	3.8	242.37	2144	2144;2063;120	0	11	By MS/MS	By MS/MS	By MS/MS	0.41226	0.78474	9.7228	8	6	Median	0.47479	0.88631	21.132	8	6	Median	1.0554	1.0601	14.68	8	6
Q9UDW1	Q9UDW1	2	2	2	Cytochrome b-c1 complex subunit 9	UQCR10	sp|Q9UDW1|QCR9_HUMAN Cytochrome b-c1 complex subunit 9 OS=Homo sapiens OX=9606 GN=UQCR10 PE=1 SV=3	TRUE	1	2	2	2	2	2	1	2	2	1	2	2	1	38.1	38.1	38.1	7.3084	63	63	0	6.6824	By MS/MS	By MS/MS	By MS/MS	0.69171	1.2837	7.8815	7	6	Median	0.49633	0.92643	19.038	7	6	Median	0.75572	0.73832	22.666	7	6
O00267	O00267	5	5	5	Transcription elongation factor SPT5	SUPT5H	sp|O00267|SPT5H_HUMAN Transcription elongation factor SPT5 OS=Homo sapiens OX=9606 GN=SUPT5H PE=1 SV=1	TRUE	1	5	5	5	3	3	3	3	3	3	3	3	3	7.5	7.5	7.5	121	1087	1087	0	19.024	By MS/MS	By MS/MS	By MS/MS	0.65064	1.2659	12.498	8	3	Leave out requantified	0.70391	1.1504	8.263	8	3	Leave out requantified	0.9297	0.8923	11.585	7	3
P48426;H7BXS3	P48426;H7BXS3	3;2	3;2	2;1	Phosphatidylinositol 5-phosphate 4-kinase type-2 alpha	PIP4K2A	sp|P48426|PI42A_HUMAN Phosphatidylinositol 5-phosphate 4-kinase type-2 alpha OS=Homo sapiens OX=9606 GN=PIP4K2A PE=1 SV=2;tr|H7BXS3|H7BXS3_HUMAN Phosphatidylinositol 5-phosphate 4-kinase type-2 alpha OS=Homo sapiens OX=9606 GN=PIP4K2A PE=1 SV=1	TRUE	2	3	3	2	3	2	2	3	2	2	2	2	2	10.1	10.1	5.9	46.224	406	406;266	0	27.383	By MS/MS	By MS/MS	By MS/MS	0.61342	1.2863	18.527	8	7	Median	0.67682	1.3262	19.288	8	7	Median	1.0426	1.0346	27.658	8	7
O00182;J3QS92;J3KS82;J3KSY2;Q6DKI2;Q3B8N2;J3KSA0;J3QSH0;J3KT17;J3QR96	O00182	7;2;2;2;2;2;1;1;1;1	7;2;2;2;2;2;1;1;1;1	7;2;2;2;2;2;1;1;1;1	Galectin-9	LGALS9	sp|O00182|LEG9_HUMAN Galectin-9 OS=Homo sapiens OX=9606 GN=LGALS9 PE=1 SV=2	TRUE	10	7	7	7	7	6	7	7	6	7	7	6	7	25.9	25.9	25.9	39.518	355	355;125;175;323;356;356;137;175;234;246	0	78.588	By MS/MS	By MS/MS	By MS/MS	0.62828	1.2304	5.3787	22	0	Leave out requantified	0.67708	1.3415	3.7291	22	0	Leave out requantified	1.0223	1.0324	7.4372	22	0
B4DJ81;P28331	B4DJ81;P28331	8;8	8;8	8;8	NADH-ubiquinone oxidoreductase 75 kDa subunit, mitochondrial	NDUFS1	tr|B4DJ81|B4DJ81_HUMAN NADH-ubiquinone oxidoreductase 75 kDa subunit, mitochondrial OS=Homo sapiens OX=9606 GN=NDUFS1 PE=1 SV=1;sp|P28331|NDUS1_HUMAN NADH-ubiquinone oxidoreductase 75 kDa subunit, mitochondrial OS=Homo sapiens OX=9606 GN=NDUFS1 PE=1 SV=3	TRUE	2	8	8	8	6	6	5	6	6	5	6	6	5	20.5	20.5	20.5	66.921	611	611;727	0	31.437	By MS/MS	By MS/MS	By MS/MS	0.65936	1.1211	23.369	15	7	Leave out requantified	0.70554	1.0413	12.089	15	7	Leave out requantified	1.2051	1.1061	1.0183	15	7
A6NHR9;J3KTL8	A6NHR9;J3KTL8	7;6	7;6	7;6	Structural maintenance of chromosomes flexible hinge domain-containing protein 1	SMCHD1	sp|A6NHR9|SMHD1_HUMAN Structural maintenance of chromosomes flexible hinge domain-containing protein 1 OS=Homo sapiens OX=9606 GN=SMCHD1 PE=1 SV=2;tr|J3KTL8|J3KTL8_HUMAN Structural maintenance of chromosomes flexible hinge domain-containing protein 1 (Frag	TRUE	2	7	7	7	6	6	4	6	6	4	6	6	4	4.7	4.7	4.7	226.37	2005	2005;1388	0	18.098	By MS/MS	By MS/MS	By MS/MS	0.44045	0.89324	96.97	14	5	Leave out requantified	0.47688	0.91182	91.521	14	5	Leave out requantified	0.99022	0.89452	11.527	14	5
H0YB18;H0YB70;F6UJY9;J9JIE9;A0A0A0MTR5;E7EWH8;F6UJY1;Q5T013	H0YB18;H0YB70;F6UJY9;J9JIE9;A0A0A0MTR5;E7EWH8;F6UJY1;Q5T013	1;1;1;1;1;1;1;1	1;1;1;1;1;1;1;1	1;1;1;1;1;1;1;1	Hydroxypyruvate isomerase;Putative hydroxypyruvate isomerase	HYI	tr|H0YB18|H0YB18_HUMAN Putative hydroxypyruvate isomerase (Fragment) OS=Homo sapiens OX=9606 GN=HYI PE=1 SV=1;tr|H0YB70|H0YB70_HUMAN Putative hydroxypyruvate isomerase (Fragment) OS=Homo sapiens OX=9606 GN=HYI PE=1 SV=1;tr|F6UJY9|F6UJY9_HUMAN Putative hydr	TRUE	8	1	1	1	1	1	1	1	1	1	1	1	1	13	13	13	17.588	161	161;186;213;238;272;276;302;277	0.0010352	2.9451	By MS/MS	By MS/MS	By MS/MS	0.45998	0.86056	33.41	2	2	Median	NaN	NaN	NaN	1	1	Median	NaN	NaN	NaN	1	1
Q16831;F8WD51;C9J486;C9JIP2;B4DND0;C9K0J2	Q16831;F8WD51;C9J486;C9JIP2;B4DND0	4;2;2;2;2;1	4;2;2;2;2;1	4;2;2;2;2;1	Uridine phosphorylase 1	UPP1	sp|Q16831|UPP1_HUMAN Uridine phosphorylase 1 OS=Homo sapiens OX=9606 GN=UPP1 PE=1 SV=1;tr|F8WD51|F8WD51_HUMAN Uridine phosphorylase 1 OS=Homo sapiens OX=9606 GN=UPP1 PE=1 SV=1;tr|C9J486|C9J486_HUMAN Uridine phosphorylase 1 (Fragment) OS=Homo sapiens OX=960	TRUE	6	4	4	4	2	4	1	2	4	1	2	4	1	13.2	13.2	13.2	33.934	310	310;85;144;146;171;29	0	7.8503	By MS/MS	By MS/MS	By MS/MS	0.58923	0.93984	29.298	7	1	Leave out requantified	0.70608	1.0533	23.982	7	1	Leave out requantified	1.4258	1.3494	16.201	7	1
A0A0A6YYA0;Q9Y3B3	A0A0A6YYA0;Q9Y3B3	1;1	1;1	1;1	Transmembrane emp24 domain-containing protein 7	TMED7-TICAM2;TMED7	tr|A0A0A6YYA0|A0A0A6YYA0_HUMAN Protein TMED7-TICAM2 OS=Homo sapiens OX=9606 GN=TMED7-TICAM2 PE=3 SV=1;sp|Q9Y3B3|TMED7_HUMAN Transmembrane emp24 domain-containing protein 7 OS=Homo sapiens OX=9606 GN=TMED7 PE=1 SV=2	TRUE	2	1	1	1	1	1	1	1	1	1	1	1	1	5.3	5.3	5.3	21.233	188	188;224	0.0010302	2.8924	By MS/MS	By MS/MS	By MS/MS	0.48275	0.97009	7.1535	3	0	Median	0.55054	1.069	11.163	3	0	Median	1.1306	1.1217	3.3379	3	0
Q13155;A8MU58	Q13155	3;1	3;1	3;1	Aminoacyl tRNA synthase complex-interacting multifunctional protein 2	AIMP2	sp|Q13155|AIMP2_HUMAN Aminoacyl tRNA synthase complex-interacting multifunctional protein 2 OS=Homo sapiens OX=9606 GN=AIMP2 PE=1 SV=2	TRUE	2	3	3	3	2	3	2	2	3	2	2	3	2	13.1	13.1	13.1	35.348	320	320;242	0	36.384	By MS/MS	By MS/MS	By MS/MS	0.56507	1.008	31.509	6	2	Median	0.59786	0.95534	3.6093	6	2	Leave out requantified	1.1281	1.0974	33.225	6	2
Q13630;E9PP14;A0A0J9YX13;E9PKL9;E9PLH9;E9PP60;H0YCP7	Q13630;E9PP14;A0A0J9YX13;E9PKL9;E9PLH9	7;6;6;6;5;2;1	7;6;6;6;5;2;1	7;6;6;6;5;2;1	GDP-L-fucose synthase	TSTA3	sp|Q13630|FCL_HUMAN GDP-L-fucose synthase OS=Homo sapiens OX=9606 GN=TSTA3 PE=1 SV=1;tr|E9PP14|E9PP14_HUMAN GDP-L-fucose synthase (Fragment) OS=Homo sapiens OX=9606 GN=TSTA3 PE=1 SV=1;tr|A0A0J9YX13|A0A0J9YX13_HUMAN GDP-L-fucose synthase (Fragment) OS=Homo	TRUE	7	7	7	7	6	6	5	6	6	5	6	6	5	23.1	23.1	23.1	35.892	321	321;198;221;268;118;115;64	0	42.165	By MS/MS	By MS/MS	By MS/MS	0.70736	1.3605	14.881	17	6	Leave out requantified	0.52336	0.9867	5.8197	17	6	Leave out requantified	0.82788	0.82281	17.667	17	6
P50552;K7EM16;K7ENR7;K7ENL7;K7EIG8;K7EQD0	P50552	20;7;6;6;3;1	20;7;6;6;3;1	20;7;6;6;3;1	Vasodilator-stimulated phosphoprotein	VASP	sp|P50552|VASP_HUMAN Vasodilator-stimulated phosphoprotein OS=Homo sapiens OX=9606 GN=VASP PE=1 SV=3	TRUE	6	20	20	20	18	18	19	18	18	19	18	18	19	49.7	49.7	49.7	39.829	380	380;183;59;103;46;35	0	169.07	By MS/MS	By MS/MS	By MS/MS	0.70885	1.2027	18.819	83	20	Leave out requantified	0.70675	1.0787	16.411	83	20	Leave out requantified	0.96541	0.89485	9.7679	83	20
F8VV32;A0A0B4J259;P61626	F8VV32;A0A0B4J259;P61626	1;1;1	1;1;1	1;1;1	Lysozyme;Lysozyme C	LYZ	tr|F8VV32|F8VV32_HUMAN Lysozyme OS=Homo sapiens OX=9606 GN=LYZ PE=1 SV=1;tr|A0A0B4J259|A0A0B4J259_HUMAN Lysozyme OS=Homo sapiens OX=9606 GN=LYZ PE=1 SV=1;sp|P61626|LYSC_HUMAN Lysozyme C OS=Homo sapiens OX=9606 GN=LYZ PE=1 SV=1	TRUE	3	1	1	1	0	0	1	0	0	1	0	0	1	11.5	11.5	11.5	11.488	104	104;137;148	0.0016756	2.6408			By MS/MS	NaN	NaN	NaN	0	0	Median	NaN	NaN	NaN	0	0	Median	NaN	NaN	NaN	0	0
Q8TD19;G3V459	Q8TD19	5;1	5;1	5;1	Serine/threonine-protein kinase Nek9	NEK9	sp|Q8TD19|NEK9_HUMAN Serine/threonine-protein kinase Nek9 OS=Homo sapiens OX=9606 GN=NEK9 PE=1 SV=2	TRUE	2	5	5	5	4	4	4	4	4	4	4	4	4	10.7	10.7	10.7	107.17	979	979;104	0	13.877	By MS/MS	By MS/MS	By MS/MS	0.52899	0.91581	11.718	13	9	Leave out requantified	0.65094	1.0913	12.694	12	8	Leave out requantified	1.1833	1.1561	11.627	12	8
Q96C36;A0A087WTV6;J3KR12;A0A087WX69;A0A087WZF0;A0A087WZR9	Q96C36;A0A087WTV6;J3KR12	5;4;3;2;2;2	5;4;3;2;2;2	5;4;3;2;2;2	Pyrroline-5-carboxylate reductase 2	PYCR2	sp|Q96C36|P5CR2_HUMAN Pyrroline-5-carboxylate reductase 2 OS=Homo sapiens OX=9606 GN=PYCR2 PE=1 SV=1;tr|A0A087WTV6|A0A087WTV6_HUMAN Pyrroline-5-carboxylate reductase 2 OS=Homo sapiens OX=9606 GN=PYCR2 PE=1 SV=1;tr|J3KR12|J3KR12_HUMAN Uncharacterized protei	TRUE	6	5	5	5	3	3	3	3	3	3	3	3	3	20.3	20.3	20.3	33.637	320	320;246;359;87;157;319	0	32.218	By MS/MS	By MS/MS	By MS/MS	0.52599	0.93501	2.8547	8	3	Leave out requantified	0.50328	0.85912	24.953	8	3	Leave out requantified	1.0053	0.90513	27.522	8	3
A0A0B4J2E5;Q15269	A0A0B4J2E5;Q15269	1;1	1;1	1;1	Periodic tryptophan protein 2 homolog	PWP2	tr|A0A0B4J2E5|A0A0B4J2E5_HUMAN Uncharacterized protein OS=Homo sapiens OX=9606 GN=LOC102724159 PE=1 SV=1;sp|Q15269|PWP2_HUMAN Periodic tryptophan protein 2 homolog OS=Homo sapiens OX=9606 GN=PWP2 PE=2 SV=2	TRUE	2	1	1	1	1	0	0	1	0	0	1	0	0	1.7	1.7	1.7	102.45	919	919;919	0.00070447	3.1882	By MS/MS			NaN	NaN	NaN	0	0	Median	NaN	NaN	NaN	0	0	Median	NaN	NaN	NaN	0	0
C9IYR8;A0A0C4DFL7;A0A3B3ITR4;Q16850	C9IYR8;A0A0C4DFL7;A0A3B3ITR4;Q16850	1;1;1;1	1;1;1;1	1;1;1;1	Lanosterol 14-alpha demethylase	CYP51A1	tr|C9IYR8|C9IYR8_HUMAN Uncharacterized protein (Fragment) OS=Homo sapiens OX=9606 PE=4 SV=1;tr|A0A0C4DFL7|A0A0C4DFL7_HUMAN Lanosterol 14-alpha demethylase OS=Homo sapiens OX=9606 GN=CYP51A1 PE=1 SV=1;tr|A0A3B3ITR4|A0A3B3ITR4_HUMAN Uncharacterized protein (	TRUE	4	1	1	1	1	0	0	1	0	0	1	0	0	66.7	66.7	66.7	3.3509	30	30;509;708;503	0	4.1825	By MS/MS			NaN	NaN	NaN	1	1	Median	NaN	NaN	NaN	1	1	Median	NaN	NaN	NaN	1	1
Q8TCS8;H7C3C5	Q8TCS8	12;1	12;1	12;1	Polyribonucleotide nucleotidyltransferase 1, mitochondrial	PNPT1	sp|Q8TCS8|PNPT1_HUMAN Polyribonucleotide nucleotidyltransferase 1, mitochondrial OS=Homo sapiens OX=9606 GN=PNPT1 PE=1 SV=2	TRUE	2	12	12	12	10	12	10	10	12	10	10	12	10	20.4	20.4	20.4	85.95	783	783;139	0	66.061	By MS/MS	By MS/MS	By MS/MS	0.67516	1.1025	9.0771	29	9	Leave out requantified	1.1595	1.904	13.079	29	9	Leave out requantified	1.7531	1.6663	16.474	29	9
Q13586;E9PNJ4;G0XQ39;E9PIQ8;H0YDB2;E9PRE4;E9PR07;E9PJ19;E9PMB4;E9PRZ7;E9PR09;E9PN27	Q13586;E9PNJ4;G0XQ39;E9PIQ8;H0YDB2	4;3;3;2;2;1;1;1;1;1;1;1	4;3;3;2;2;1;1;1;1;1;1;1	4;3;3;2;2;1;1;1;1;1;1;1	Stromal interaction molecule 1	STIM1	sp|Q13586|STIM1_HUMAN Stromal interaction molecule 1 OS=Homo sapiens OX=9606 GN=STIM1 PE=1 SV=3;tr|E9PNJ4|E9PNJ4_HUMAN Stromal interaction molecule 1 OS=Homo sapiens OX=9606 GN=STIM1 PE=1 SV=1;tr|G0XQ39|G0XQ39_HUMAN STIM1L OS=Homo sapiens OX=9606 GN=STIM1	TRUE	12	4	4	4	4	4	4	4	4	4	4	4	4	7.2	7.2	7.2	77.422	685	685;512;791;139;405;54;67;80;82;110;117;132	0	16.291	By MS/MS	By MS/MS	By MS/MS	0.54676	1.011	1.4799	16	12	Leave out requantified	0.47875	0.79663	40.804	16	12	Leave out requantified	0.86356	0.83527	43.478	16	12
Q15080;A0A0G2JR51;A0A217FLJ2;B0QY04	Q15080;A0A0G2JR51;A0A217FLJ2;B0QY04	5;4;4;3	5;4;4;3	5;4;4;3	Neutrophil cytosol factor 4	NCF4	sp|Q15080|NCF4_HUMAN Neutrophil cytosol factor 4 OS=Homo sapiens OX=9606 GN=NCF4 PE=1 SV=2;tr|A0A0G2JR51|A0A0G2JR51_HUMAN Neutrophil cytosol factor 4 (Fragment) OS=Homo sapiens OX=9606 GN=NCF4 PE=1 SV=1;tr|A0A217FLJ2|A0A217FLJ2_HUMAN Neutrophil cytosol fac	TRUE	4	5	5	5	2	5	3	2	5	3	2	5	3	16.8	16.8	16.8	39.031	339	339;300;348;166	0	15.81	By MS/MS	By MS/MS	By MS/MS	0.50198	0.81289	50.65	9	6	Median	0.49919	0.81683	17.141	9	6	Median	1.1053	1.0036	53.028	9	6
Q5QPK2;H0Y368;O60762;Q5QPJ9	Q5QPK2;H0Y368;O60762;Q5QPJ9	7;7;7;4	7;7;7;4	7;7;7;4	Dolichol-phosphate mannosyltransferase subunit 1	DPM1	tr|Q5QPK2|Q5QPK2_HUMAN Dolichol-phosphate mannosyltransferase subunit 1 OS=Homo sapiens OX=9606 GN=DPM1 PE=1 SV=1;tr|H0Y368|H0Y368_HUMAN Dolichol-phosphate mannosyltransferase subunit 1 (Fragment) OS=Homo sapiens OX=9606 GN=DPM1 PE=1 SV=1;sp|O60762|DPM1_HU	TRUE	4	7	7	7	6	5	4	6	5	4	6	5	4	30.3	30.3	30.3	32.426	287	287;295;260;221	0	26.56	By MS/MS	By MS/MS	By MS/MS	0.54933	0.72487	11.808	17	11	Leave out requantified	0.57134	0.74615	19.606	17	11	Leave out requantified	1.1388	1.0942	15.821	17	11
Q92797;A0A087WUE9;M0R3C7;M0R1C2;M0R180;M0QXP5	Q92797;A0A087WUE9	7;6;3;1;1;1	7;6;3;1;1;1	7;6;3;1;1;1	Symplekin	SYMPK	sp|Q92797|SYMPK_HUMAN Symplekin OS=Homo sapiens OX=9606 GN=SYMPK PE=1 SV=2;tr|A0A087WUE9|A0A087WUE9_HUMAN Symplekin OS=Homo sapiens OX=9606 GN=SYMPK PE=1 SV=1	TRUE	6	7	7	7	4	5	4	4	5	4	4	5	4	11.5	11.5	11.5	141.15	1274	1274;1058;673;115;137;142	0	26.726	By MS/MS	By MS/MS	By MS/MS	0.55148	0.82134	10.731	13	7	Leave out requantified	0.4512	0.64436	35.495	11	5	Leave out requantified	1.0201	0.96342	23.748	11	5
H0Y7F0;H0Y9H6;E9PDE4;E7ES10;E9PCH5;E7EVY3;B7Z574;A0A0C4DGB5;P20810;F8W7E0;E7EQ12;A0A0A0MR45;E7EQA0;H0YD33	H0Y7F0;H0Y9H6;E9PDE4;E7ES10;E9PCH5;E7EVY3;B7Z574;A0A0C4DGB5;P20810;F8W7E0;E7EQ12;A0A0A0MR45;E7EQA0;H0YD33	2;2;2;2;2;2;2;2;2;1;1;1;1;1	2;2;2;2;2;2;2;2;2;1;1;1;1;1	2;2;2;2;2;2;2;2;2;1;1;1;1;1	Calpastatin	CAST	tr|H0Y7F0|H0Y7F0_HUMAN Calpastatin (Fragment) OS=Homo sapiens OX=9606 GN=CAST PE=1 SV=1;tr|H0Y9H6|H0Y9H6_HUMAN Calpastatin (Fragment) OS=Homo sapiens OX=9606 GN=CAST PE=1 SV=1;tr|E9PDE4|E9PDE4_HUMAN Calpastatin OS=Homo sapiens OX=9606 GN=CAST PE=1 SV=1;tr|	TRUE	14	2	2	2	1	1	2	1	1	2	1	1	2	8.7	8.7	8.7	47.713	436	436;465;636;642;673;693;694;754;708;393;423;430;431;450	0	5.8456	By MS/MS	By MS/MS	By MS/MS	0.63729	0.93857	10.271	2	0	Median	0.59336	0.75952	18.394	2	0	Median	0.93665	0.83164	27.051	2	0
Q9H2M9	Q9H2M9	5	5	5	Rab3 GTPase-activating protein non-catalytic subunit	RAB3GAP2	sp|Q9H2M9|RBGPR_HUMAN Rab3 GTPase-activating protein non-catalytic subunit OS=Homo sapiens OX=9606 GN=RAB3GAP2 PE=1 SV=1	TRUE	1	5	5	5	3	3	2	3	3	2	3	3	2	3.9	3.9	3.9	155.98	1393	1393	0	7.4021	By MS/MS	By MS/MS	By MS/MS	0.57117	1.0173	2.9187	7	2	Leave out requantified	0.49328	0.86309	6.5382	7	2	Leave out requantified	0.92629	0.84011	0.81721	7	2
A0A087WYF6;F8W7U3;J3KP36;E7ESD2;A0A0A0MR88;A0A096LPC5;Q9Y4E1;Q641Q2;B1AP61;Q5SRD0	A0A087WYF6;F8W7U3;J3KP36;E7ESD2;A0A0A0MR88;A0A096LPC5;Q9Y4E1;Q641Q2	4;4;4;4;4;4;4;4;1;1	4;4;4;4;4;4;4;4;1;1	4;4;4;4;4;4;4;4;1;1	WASH complex subunit FAM21C;WASH complex subunit FAM21A	FAM21A;FAM21C	tr|A0A087WYF6|A0A087WYF6_HUMAN WASH complex subunit 2A OS=Homo sapiens OX=9606 GN=WASHC2A PE=1 SV=1;tr|F8W7U3|F8W7U3_HUMAN WASH complex subunit 2A OS=Homo sapiens OX=9606 GN=WASHC2A PE=1 SV=1;tr|J3KP36|J3KP36_HUMAN WASH complex subunit 2C OS=Homo sapiens O	TRUE	10	4	4	4	2	1	4	2	1	4	2	1	4	6.7	6.7	6.7	136.57	1245	1245;1253;1262;1279;1341;1341;1320;1341;156;308	0	26.892	By MS/MS	By MS/MS	By MS/MS	0.6056	0.94494	30.039	5	4	Median	0.6645	0.85329	21.141	5	4	Median	1.2665	1.1919	34.345	5	4
V9GYZ1;V9GZ57;P18084;H7C580	V9GYZ1;V9GZ57;P18084;H7C580	2;2;2;1	2;2;2;1	2;2;2;1	Integrin beta;Integrin beta-5	ITGB5	tr|V9GYZ1|V9GYZ1_HUMAN Integrin beta (Fragment) OS=Homo sapiens OX=9606 GN=ITGB5 PE=1 SV=1;tr|V9GZ57|V9GZ57_HUMAN Integrin beta (Fragment) OS=Homo sapiens OX=9606 GN=ITGB5 PE=1 SV=8;sp|P18084|ITB5_HUMAN Integrin beta-5 OS=Homo sapiens OX=9606 GN=ITGB5 PE=1	TRUE	4	2	2	2	2	2	1	2	2	1	2	2	1	14.4	14.4	14.4	16.133	139	139;323;799;79	0	9.0321	By MS/MS	By MS/MS	By MS/MS	0.54015	0.90253	15.39	5	1	Leave out requantified	0.59761	0.91708	9.6234	5	1	Leave out requantified	1.1486	1.0625	6.7742	5	1
R4GN43;A0A0C4DGS0;A0A2Y9D025;P56556	R4GN43;A0A0C4DGS0;A0A2Y9D025;P56556	1;1;1;1	1;1;1;1	1;1;1;1	NADH dehydrogenase [ubiquinone] 1 alpha subcomplex subunit 6	NDUFA6	tr|R4GN43|R4GN43_HUMAN NADH dehydrogenase [ubiquinone] 1 alpha subcomplex subunit 6 OS=Homo sapiens OX=9606 GN=NDUFA6 PE=1 SV=1;tr|A0A0C4DGS0|A0A0C4DGS0_HUMAN NADH dehydrogenase [ubiquinone] 1 alpha subcomplex subunit 6 OS=Homo sapiens OX=9606 GN=NDUFA6 PE	TRUE	4	1	1	1	1	1	1	1	1	1	1	1	1	11.3	11.3	11.3	8.5099	71	71;128;154;128	0.0071207	1.8918	By MS/MS	By MS/MS	By MS/MS	0.55489	0.82936	22.36	4	2	Median	0.54293	0.74795	22.529	4	2	Median	1.0989	0.96847	13.005	4	2
O43252	O43252	7	7	7	Bifunctional 3-phosphoadenosine 5-phosphosulfate synthase 1;Sulfate adenylyltransferase;Adenylyl-sulfate kinase	PAPSS1	sp|O43252|PAPS1_HUMAN Bifunctional 3-phosphoadenosine 5-phosphosulfate synthase 1 OS=Homo sapiens OX=9606 GN=PAPSS1 PE=1 SV=2	TRUE	1	7	7	7	6	7	6	6	7	6	6	7	6	16	16	16	70.832	624	624	0	29.744	By MS/MS	By MS/MS	By MS/MS	0.63229	1.2503	39.999	22	10	Leave out requantified	1.0292	1.7561	28.522	22	10	Leave out requantified	1.5703	1.5184	28.059	22	10
R4GMU8;E9PLX3;A0A0C4DGV4;O43504	R4GMU8;E9PLX3;A0A0C4DGV4;O43504	1;1;1;1	1;1;1;1	1;1;1;1	Ragulator complex protein LAMTOR5	LAMTOR5	tr|R4GMU8|R4GMU8_HUMAN Ragulator complex protein LAMTOR5 OS=Homo sapiens OX=9606 GN=LAMTOR5 PE=1 SV=1;tr|E9PLX3|E9PLX3_HUMAN Ragulator complex protein LAMTOR5 OS=Homo sapiens OX=9606 GN=LAMTOR5 PE=1 SV=1;tr|A0A0C4DGV4|A0A0C4DGV4_HUMAN Hepatitis B virus x i	TRUE	4	1	1	1	1	0	1	1	0	1	1	0	1	25.3	25.3	25.3	8.2153	79	79;90;173;91	0.0013619	2.8048	By MS/MS		By MS/MS	1.3828	2.0284	11.939	2	2	Median	0.55531	0.70818	22.412	2	2	Median	0.40158	0.35282	8.1891	2	2
A0A0C4DGW6;A6NDU8	A0A0C4DGW6;A6NDU8	1;1	1;1	1;1	UPF0600 protein C5orf51	C5orf51	tr|A0A0C4DGW6|A0A0C4DGW6_HUMAN UPF0600 protein C5orf51 OS=Homo sapiens OX=9606 GN=C5orf51 PE=1 SV=1;sp|A6NDU8|CE051_HUMAN UPF0600 protein C5orf51 OS=Homo sapiens OX=9606 GN=C5orf51 PE=1 SV=1	TRUE	2	1	1	1	1	0	1	1	0	1	1	0	1	9.2	9.2	9.2	16.961	152	152;294	0.00035829	3.4303	By MS/MS		By MS/MS	0.93273	1.2679	19.019	2	0	Median	0.9756	1.1958	0.25148	2	0	Median	1.0644	0.97085	4.5538	2	0
A0A0C4DGX4;Q13616	A0A0C4DGX4;Q13616	5;5	5;5	5;5	Cullin-1	CUL1	tr|A0A0C4DGX4|A0A0C4DGX4_HUMAN Cullin-1 OS=Homo sapiens OX=9606 GN=CUL1 PE=1 SV=1;sp|Q13616|CUL1_HUMAN Cullin-1 OS=Homo sapiens OX=9606 GN=CUL1 PE=1 SV=2	TRUE	2	5	5	5	3	2	2	3	2	2	3	2	2	10.4	10.4	10.4	87.387	752	752;776	0	11.882	By MS/MS	By MS/MS	By MS/MS	0.46787	0.92398	80.245	4	4	Median	0.5574	0.92892	39.777	4	4	Median	1.1444	1.0655	105.05	4	4
A0A0C4DGY8;D6RA00;Q9UHY7	A0A0C4DGY8;D6RA00;Q9UHY7	2;2;2	2;2;2	2;2;2	Enolase-phosphatase E1	ENOPH1	tr|A0A0C4DGY8|A0A0C4DGY8_HUMAN Enolase-phosphatase E1 OS=Homo sapiens OX=9606 GN=ENOPH1 PE=1 SV=1;tr|D6RA00|D6RA00_HUMAN Enolase-phosphatase E1 OS=Homo sapiens OX=9606 GN=ENOPH1 PE=1 SV=1;sp|Q9UHY7|ENOPH_HUMAN Enolase-phosphatase E1 OS=Homo sapiens OX=9606	TRUE	3	2	2	2	2	1	2	2	1	2	2	1	2	22.8	22.8	22.8	16.533	149	149;173;261	0	6.9285	By MS/MS	By MS/MS	By MS/MS	0.85276	1.3263	4.0219	3	1	Median	1.1155	1.4218	32.605	3	1	Median	1.2249	1.116	49.084	3	1
A0A0D9SEM9	A0A0D9SEM9	4	1	1		DDX39A	tr|A0A0D9SEM9|A0A0D9SEM9_HUMAN ATP-dependent RNA helicase DDX39A (Fragment) OS=Homo sapiens OX=9606 GN=DDX39A PE=1 SV=1	TRUE	1	4	1	1	3	3	3	1	0	0	1	0	0	31.2	10.4	10.4	10.925	96	96	0.0041507	2.1569	By MS/MS	By matching	By matching	NaN	NaN	NaN	1	0	Median	NaN	NaN	NaN	1	0	Median	NaN	NaN	NaN	1	0
F5H7D6;H0YNT2;A0A0D9SES8;H0YKT5;H0YKN8;H0YL70;Q04726;H0YNI7;K7EMK7;Q04725;Q04724;Q04727;K7EJR7;H0YKH0;H0YLW9;H0YLI3	F5H7D6;H0YNT2;A0A0D9SES8;H0YKT5;H0YKN8;H0YL70;Q04726;H0YNI7;K7EMK7;Q04725;Q04724;Q04727	3;3;3;3;3;3;3;2;2;2;2;2;1;1;1;1	3;3;3;3;3;3;3;2;2;2;2;2;1;1;1;1	3;3;3;3;3;3;3;2;2;2;2;2;1;1;1;1	Transducin-like enhancer protein 3;Transducin-like enhancer protein 2;Transducin-like enhancer protein 1;Transducin-like enhancer protein 4	TLE3;TLE2;TLE1;TLE4	tr|F5H7D6|F5H7D6_HUMAN Transducin-like enhancer protein 3 OS=Homo sapiens OX=9606 GN=TLE3 PE=1 SV=1;tr|H0YNT2|H0YNT2_HUMAN Transducin-like enhancer protein 3 OS=Homo sapiens OX=9606 GN=TLE3 PE=1 SV=1;tr|A0A0D9SES8|A0A0D9SES8_HUMAN Transducin-like enhancer	TRUE	16	3	3	3	2	1	1	2	1	1	2	1	1	5.3	5.3	5.3	74.9	699	699;716;772;774;778;782;772;353;744;743;770;773;280;445;448;611	0	4.3723	By MS/MS	By MS/MS	By matching	0.67096	1.3698	37.66	3	1	Plateau	0.40763	0.69795	81.082	2	1	Median	0.86864	0.78033	44.661	3	1
P18583;H7C1M2	P18583;H7C1M2	2;1	2;1	2;1	Protein SON	SON	sp|P18583|SON_HUMAN Protein SON OS=Homo sapiens OX=9606 GN=SON PE=1 SV=4;tr|H7C1M2|H7C1M2_HUMAN Protein SON (Fragment) OS=Homo sapiens OX=9606 GN=SON PE=1 SV=1	TRUE	2	2	2	2	2	1	2	2	1	2	2	1	2	1.6	1.6	1.6	263.83	2426	2426;1454	0.0016801	2.6813	By MS/MS	By MS/MS	By MS/MS	0.57856	0.89122	18.021	5	3	Median	0.49531	0.91713	22.239	5	3	Median	1.1115	1.0647	14.837	5	3
Q96FN4;H3BPR8;H3BQQ3;H3BUC8	Q96FN4	7;2;1;1	6;2;1;1	6;2;1;1	Copine-2	CPNE2	sp|Q96FN4|CPNE2_HUMAN Copine-2 OS=Homo sapiens OX=9606 GN=CPNE2 PE=1 SV=3	TRUE	4	7	6	6	6	6	4	5	5	3	5	5	3	15.3	15.3	15.3	61.189	548	548;121;81;281	0	18.337	By MS/MS	By MS/MS	By MS/MS	0.76234	1.1986	3.1807	13	8	Leave out requantified	0.51102	0.70718	21.221	13	8	Leave out requantified	0.68853	0.66243	10.725	13	8
Q13442	Q13442	3	3	3	28 kDa heat- and acid-stable phosphoprotein	PDAP1	sp|Q13442|HAP28_HUMAN 28 kDa heat- and acid-stable phosphoprotein OS=Homo sapiens OX=9606 GN=PDAP1 PE=1 SV=1	TRUE	1	3	3	3	3	3	2	3	3	2	3	3	2	17.7	17.7	17.7	20.63	181	181	0	12.789	By MS/MS	By MS/MS	By MS/MS	0.55403	0.94767	27.298	9	6	Median	0.52479	0.8466	44.832	9	6	Median	1.0495	0.99887	52.851	9	6
A0A0D9SFE1;E9PJH7;Q9H936;E9PS95;A0A0D9SEI9;Q9H1K4;A0A0D9SFA8;K4DIB0;K4DIA2;A0A0D9SG84;E9PI74;E9PQ36;K4DIB6;K4DIB3;K4DIB8;K4DIA8	A0A0D9SFE1;E9PJH7;Q9H936;E9PS95;A0A0D9SEI9;Q9H1K4	3;3;3;2;2;2;1;1;1;1;1;1;1;1;1;1	3;3;3;2;2;2;1;1;1;1;1;1;1;1;1;1	3;3;3;2;2;2;1;1;1;1;1;1;1;1;1;1	Mitochondrial glutamate carrier 1;Mitochondrial glutamate carrier 2	SLC25A22;SLC25A18	tr|A0A0D9SFE1|A0A0D9SFE1_HUMAN Mitochondrial glutamate carrier 1 (Fragment) OS=Homo sapiens OX=9606 GN=SLC25A22 PE=1 SV=1;tr|E9PJH7|E9PJH7_HUMAN Mitochondrial glutamate carrier 1 (Fragment) OS=Homo sapiens OX=9606 GN=SLC25A22 PE=1 SV=5;sp|Q9H936|GHC1_HUMAN	TRUE	16	3	3	3	1	3	2	1	3	2	1	3	2	17	17	17	26.214	247	247;313;323;196;197;315;97;103;114;117;127;134;156;161;177;190	0	11.36	By MS/MS	By MS/MS	By MS/MS	1.4778	3.1364	72.152	3	0	Median	0.53053	1.0175	27.648	3	0	Median	0.40298	0.36896	77.421	3	0
P19623;K7EQ47;K7EL89;K7EKM4;K7ESL0	P19623	9;3;2;2;2	9;3;2;2;2	9;3;2;2;2	Spermidine synthase	SRM	sp|P19623|SPEE_HUMAN Spermidine synthase OS=Homo sapiens OX=9606 GN=SRM PE=1 SV=1	TRUE	5	9	9	9	9	7	6	9	7	6	9	7	6	35.4	35.4	35.4	33.824	302	302;134;83;93;119	0	22.67	By MS/MS	By MS/MS	By MS/MS	0.43762	0.82075	18.817	22	9	Leave out requantified	0.48035	0.91742	9.5411	22	9	Leave out requantified	1.1	1.0971	20.153	22	9
P61353;K7ELC7;K7EQQ9;K7ERY7	P61353;K7ELC7	9;8;1;1	9;8;1;1	9;8;1;1	60S ribosomal protein L27	RPL27	sp|P61353|RL27_HUMAN 60S ribosomal protein L27 OS=Homo sapiens OX=9606 GN=RPL27 PE=1 SV=2;tr|K7ELC7|K7ELC7_HUMAN 60S ribosomal protein L27 (Fragment) OS=Homo sapiens OX=9606 GN=RPL27 PE=1 SV=1	TRUE	4	9	9	9	8	6	6	8	6	6	8	6	6	49.3	49.3	49.3	15.798	136	136;144;38;40	0	44.908	By MS/MS	By MS/MS	By MS/MS	0.49723	0.80075	32.416	37	10	Leave out requantified	0.50005	0.84004	33.268	37	10	Leave out requantified	1.1258	1.0448	9.4292	37	10
P62753;A2A3R5;A2A3R7	P62753;A2A3R5	11;6;5	11;6;5	11;6;5	40S ribosomal protein S6	RPS6	sp|P62753|RS6_HUMAN 40S ribosomal protein S6 OS=Homo sapiens OX=9606 GN=RPS6 PE=1 SV=1;tr|A2A3R5|A2A3R5_HUMAN 40S ribosomal protein S6 OS=Homo sapiens OX=9606 GN=RPS6 PE=1 SV=1	TRUE	3	11	11	11	8	11	8	8	11	8	8	11	8	27.7	27.7	27.7	28.68	249	249;218;91	0	77.31	By MS/MS	By MS/MS	By MS/MS	0.56215	0.95406	24.024	33	10	Leave out requantified	0.62687	1.009	7.0874	33	10	Leave out requantified	1.2116	1.081	22.023	33	10
Q7Z5R6	Q7Z5R6	11	11	11	Amyloid beta A4 precursor protein-binding family B member 1-interacting protein	APBB1IP	sp|Q7Z5R6|AB1IP_HUMAN Amyloid beta A4 precursor protein-binding family B member 1-interacting protein OS=Homo sapiens OX=9606 GN=APBB1IP PE=1 SV=1	TRUE	1	11	11	11	8	11	10	8	11	10	8	11	10	22.7	22.7	22.7	73.182	666	666	0	53.65	By MS/MS	By MS/MS	By MS/MS	0.53233	1.0487	30.098	32	13	Leave out requantified	0.67474	1.2607	23.149	32	13	Leave out requantified	1.1291	1.0807	19.917	32	13
P51570;K7ERJ9;K7ERN9;K7EII7	P51570;K7ERJ9	9;5;1;1	9;5;1;1	9;5;1;1	Galactokinase	GALK1	sp|P51570|GALK1_HUMAN Galactokinase OS=Homo sapiens OX=9606 GN=GALK1 PE=1 SV=1;tr|K7ERJ9|K7ERJ9_HUMAN Galactokinase OS=Homo sapiens OX=9606 GN=GALK1 PE=1 SV=1	TRUE	4	9	9	9	5	6	6	5	6	6	5	6	6	26.3	26.3	26.3	42.272	392	392;120;91;184	0	35.883	By MS/MS	By MS/MS	By MS/MS	0.4121	0.79013	30.594	14	5	Leave out requantified	0.56185	0.88039	46.811	14	5	Leave out requantified	0.91259	0.85596	29.936	14	5
Q9BWS9;E9PI70;E9PIP0;E9PRL3;E9PPH0;E9PPA0;E9PKF1;H0YDL6;H0YCC4;H0YC89	Q9BWS9;E9PI70;E9PIP0;E9PRL3;E9PPH0;E9PPA0	6;3;3;3;3;3;2;1;1;1	6;3;3;3;3;3;2;1;1;1	6;3;3;3;3;3;2;1;1;1	Chitinase domain-containing protein 1	CHID1	sp|Q9BWS9|CHID1_HUMAN Chitinase domain-containing protein 1 OS=Homo sapiens OX=9606 GN=CHID1 PE=1 SV=1;tr|E9PI70|E9PI70_HUMAN Chitinase domain-containing protein 1 (Fragment) OS=Homo sapiens OX=9606 GN=CHID1 PE=1 SV=8;tr|E9PIP0|E9PIP0_HUMAN Chitinase domai	TRUE	10	6	6	6	5	3	4	5	3	4	5	3	4	17	17	17	44.94	393	393;115;119;131;162;224;84;69;84;108	0	17.435	By MS/MS	By MS/MS	By MS/MS	0.56486	0.82391	21.415	12	2	Leave out requantified	0.60259	0.75465	10.011	11	1	Leave out requantified	1.0615	1.0094	25.214	11	1
P62316;K7EJB5;K7ERG4	P62316;K7EJB5;K7ERG4	10;5;5	10;5;5	10;5;5	Small nuclear ribonucleoprotein Sm D2	SNRPD2	sp|P62316|SMD2_HUMAN Small nuclear ribonucleoprotein Sm D2 OS=Homo sapiens OX=9606 GN=SNRPD2 PE=1 SV=1;tr|K7EJB5|K7EJB5_HUMAN Small nuclear ribonucleoprotein Sm D2 OS=Homo sapiens OX=9606 GN=SNRPD2 PE=1 SV=1;tr|K7ERG4|K7ERG4_HUMAN Small nuclear ribonucleop	TRUE	3	10	10	10	5	9	3	5	9	3	5	9	3	62.7	62.7	62.7	13.527	118	118;54;78	0	26.999	By MS/MS	By MS/MS	By MS/MS	0.50374	0.79779	15.346	16	6	Leave out requantified	0.53253	0.87504	19.649	16	6	Leave out requantified	1.0657	1.0436	9.6759	16	6
A0A0G2JNK8;A0A0G2JMI0;A0A0G2JNU6;A0A140T8W3;A0A0G2JQ50;A0A0G2JP18;A0A0G2JLV7;Q6GTX8;A0A0G2JM94;A8MZ84;D3YTC8	A0A0G2JNK8;A0A0G2JMI0;A0A0G2JNU6;A0A140T8W3;A0A0G2JQ50;A0A0G2JP18;A0A0G2JLV7;Q6GTX8;A0A0G2JM94;A8MZ84;D3YTC8	2;2;2;2;2;2;2;2;1;1;1	2;2;2;2;2;2;2;2;1;1;1	2;2;2;2;2;2;2;2;1;1;1	Leukocyte-associated immunoglobulin-like receptor 1	LAIR1	tr|A0A0G2JNK8|A0A0G2JNK8_HUMAN Leukocyte-associated immunoglobulin-like receptor 1 OS=Homo sapiens OX=9606 GN=LAIR1 PE=1 SV=1;tr|A0A0G2JMI0|A0A0G2JMI0_HUMAN Leukocyte-associated immunoglobulin-like receptor 1 OS=Homo sapiens OX=9606 GN=LAIR1 PE=1 SV=1;tr|A	TRUE	11	2	2	2	1	0	1	1	0	1	1	0	1	13.4	13.4	13.4	29.692	269	269;269;276;280;286;286;287;287;136;269;286	0	5.3853	By MS/MS		By MS/MS	NaN	NaN	NaN	0	0	Median	NaN	NaN	NaN	0	0	Median	NaN	NaN	NaN	0	0
H0YCG0;A0A0G2JMS7;A0A0G2JNZ2;A0A0G2JPP5;Q14160	H0YCG0;A0A0G2JMS7;A0A0G2JNZ2;A0A0G2JPP5;Q14160	1;1;1;1;1	1;1;1;1;1	1;1;1;1;1	Protein scribble homolog	SCRIB	tr|H0YCG0|H0YCG0_HUMAN Protein scribble homolog (Fragment) OS=Homo sapiens OX=9606 GN=SCRIB PE=1 SV=1;tr|A0A0G2JMS7|A0A0G2JMS7_HUMAN Protein scribble homolog OS=Homo sapiens OX=9606 GN=SCRIB PE=1 SV=1;tr|A0A0G2JNZ2|A0A0G2JNZ2_HUMAN Protein scribble homolog	TRUE	5	1	1	1	0	1	0	0	1	0	0	1	0	3.4	3.4	3.4	68.258	650	650;1549;1630;1655;1630	0	5.1753		By MS/MS		NaN	NaN	NaN	0	0	Median	NaN	NaN	NaN	0	0	Median	NaN	NaN	NaN	0	0
A0A0G2JQ41;A0A1C7CYZ0;Q12979;I3L2P5;B7Z683;A0A0G2JSE0;A0A0D9SGD7;A0A0G2JRJ1;I3L3W0;I3L1U8;I3L0R7;H0Y554;P11274	A0A0G2JQ41;A0A1C7CYZ0;Q12979;I3L2P5;B7Z683	3;3;3;2;2;1;1;1;1;1;1;1;1	3;3;3;2;2;1;1;1;1;1;1;1;1	3;3;3;2;2;1;1;1;1;1;1;1;1	Active breakpoint cluster region-related protein	ABR	tr|A0A0G2JQ41|A0A0G2JQ41_HUMAN Active breakpoint cluster region-related protein (Fragment) OS=Homo sapiens OX=9606 GN=ABR PE=1 SV=1;tr|A0A1C7CYZ0|A0A1C7CYZ0_HUMAN Active breakpoint cluster region-related protein OS=Homo sapiens OX=9606 GN=ABR PE=1 SV=1;sp|	TRUE	13	3	3	3	1	2	2	1	2	2	1	2	2	4	4	4	88.857	777	777;871;859;168;641;49;49;97;133;165;189;257;1271	0	5.2673	By MS/MS	By MS/MS	By MS/MS	0.57263	0.87921	13.985	4	1	Median	0.81819	1.1422	19.142	4	1	Median	1.3131	1.2245	6.5492	4	1
E9PBD8;E7EMG9;P33241;C9JKF7;C9JU59	E9PBD8;E7EMG9;P33241;C9JKF7;C9JU59	2;2;2;1;1	2;2;2;1;1	2;2;2;1;1	Lymphocyte-specific protein 1	LSP1	tr|E9PBD8|E9PBD8_HUMAN Lymphocyte-specific protein 1 (Fragment) OS=Homo sapiens OX=9606 GN=LSP1 PE=1 SV=1;tr|E7EMG9|E7EMG9_HUMAN Lymphocyte-specific protein 1 (Fragment) OS=Homo sapiens OX=9606 GN=LSP1 PE=1 SV=1;sp|P33241|LSP1_HUMAN Lymphocyte-specific pro	TRUE	5	2	2	2	2	2	2	2	2	2	2	2	2	19.8	19.8	19.8	24.405	222	222;275;339;126;175	0	35.925	By MS/MS	By MS/MS	By MS/MS	0.48199	0.82149	2.0371	7	3	Leave out requantified	0.32534	0.50839	4.4027	7	3	Leave out requantified	0.79076	0.72404	0.26587	7	3
A0A0J9YW64;A6NIW2;Q5JSL3	A0A0J9YW64;A6NIW2;Q5JSL3	1;1;1	1;1;1	1;1;1	Dedicator of cytokinesis protein 11	DOCK11	tr|A0A0J9YW64|A0A0J9YW64_HUMAN Dedicator of cytokinesis protein 11 (Fragment) OS=Homo sapiens OX=9606 GN=DOCK11 PE=1 SV=1;tr|A6NIW2|A6NIW2_HUMAN Dedicator of cytokinesis protein 11 OS=Homo sapiens OX=9606 GN=DOCK11 PE=1 SV=2;sp|Q5JSL3|DOC11_HUMAN Dedicator	TRUE	3	1	1	1	1	0	1	1	0	1	1	0	1	1.1	1.1	1.1	218.19	1902	1902;2077;2073	0	4.2234	By MS/MS		By MS/MS	0.60163	1.1872	2.4145	2	2	Median	NaN	NaN	NaN	1	1	Median	NaN	NaN	NaN	1	1
O14933;E9PQT7	O14933	6;1	6;1	6;1	Ubiquitin/ISG15-conjugating enzyme E2 L6	UBE2L6	sp|O14933|UB2L6_HUMAN Ubiquitin/ISG15-conjugating enzyme E2 L6 OS=Homo sapiens OX=9606 GN=UBE2L6 PE=1 SV=4	TRUE	2	6	6	6	3	4	5	3	4	5	3	4	5	41.8	41.8	41.8	17.769	153	153;127	0	15.034	By MS/MS	By MS/MS	By MS/MS	0.5232	1.0992	26.206	15	8	Leave out requantified	1.3114	1.9284	6.0036	15	8	Leave out requantified	1.6923	1.6778	36.126	15	8
A0A0M3HER1;A0A0J9YXC7;P48059	A0A0M3HER1;A0A0J9YXC7;P48059	1;1;1	1;1;1	1;1;1	LIM and senescent cell antigen-like-containing domain protein 1	LIMS1	tr|A0A0M3HER1|A0A0M3HER1_HUMAN LIM and senescent cell antigen-like-containing domain protein 1 (Fragment) OS=Homo sapiens OX=9606 GN=LIMS1 PE=1 SV=1;tr|A0A0J9YXC7|A0A0J9YXC7_HUMAN LIM and senescent cell antigen-like-containing domain protein OS=Homo sapien	TRUE	3	1	1	1	1	1	1	1	1	1	1	1	1	5.7	5.7	5.7	24.307	209	209;398;325	0	5.5232	By MS/MS	By MS/MS	By matching	0.58069	0.87203	18.649	3	0	Plateau	0.73377	0.97436	8.7555	3	0	Plateau	1.3006	1.1607	15.956	3	0
H3BRY5;P50225;H3BQX5;P50226;E9PKR8;E9PKW4;E9PM76;A0A0A6YYL2;P0DMN0;P0DMM9;H3BNY7	H3BRY5;P50225;H3BQX5;P50226	7;7;4;4;3;3;2;2;2;2;1	7;7;4;4;3;3;2;2;2;2;1	7;7;4;4;3;3;2;2;2;2;1	Sulfotransferase;Sulfotransferase 1A1;Sulfotransferase 1A2	SULT1A1;SULT1A2	tr|H3BRY5|H3BRY5_HUMAN Sulfotransferase (Fragment) OS=Homo sapiens OX=9606 GN=SULT1A1 PE=1 SV=1;sp|P50225|ST1A1_HUMAN Sulfotransferase 1A1 OS=Homo sapiens OX=9606 GN=SULT1A1 PE=1 SV=3;tr|H3BQX5|H3BQX5_HUMAN Sulfotransferase (Fragment) OS=Homo sapiens OX=96	TRUE	11	7	7	7	6	4	5	6	4	5	6	4	5	38.1	38.1	38.1	32.625	281	281;295;169;295;192;262;221;301;295;295;87	0	34.259	By MS/MS	By MS/MS	By MS/MS	0.47957	0.83745	10.412	17	7	Leave out requantified	0.55056	0.78945	21.383	17	7	Leave out requantified	1.0376	0.94569	20.211	17	7
E9BE01;A0A0R4J6X0;E9BDF4	E9BE01;A0A0R4J6X0	7;7;2	6;6;1	6;6;1			tr|E9BE01|E9BE01_LEIDB Histone H2B OS=Leishmania donovani (strain BPK282A1) GN=LDBPK_190040 PE=3 SV=1;tr|A0A0R4J6X0|A0A0R4J6X0_LEIDB Histone H2B OS=Leishmania donovani (strain BPK282A1) GN=LDBPK_091410 PE=4 SV=1	non-human	3	7	6	6	5	6	7	4	5	6	4	5	6	54.2	47.7	47.7	11.861	107	107;111;111	0	27.147	By MS/MS	By MS/MS	By MS/MS	0.16773	0.35984	35.191	18	8	Leave out requantified	0.15426	0.30281	29.605	18	8	Leave out requantified	0.94211	0.88747	3.1863	18	8
E9BFA3;A0A0R4J832	E9BFA3;A0A0R4J832	4;4	4;4	4;4			tr|E9BFA3|E9BFA3_LEIDB Histone H2A OS=Leishmania donovani (strain BPK282A1) GN=LDBPK_211170 PE=3 SV=1;tr|A0A0R4J832|A0A0R4J832_LEIDB Histone H2A OS=Leishmania donovani (strain BPK282A1) GN=LDBPK_211160 PE=4 SV=1	non-human	2	4	4	4	4	3	4	4	3	4	4	3	4	31.1	31.1	31.1	13.905	132	132;132	0	11.272	By MS/MS	By MS/MS	By MS/MS	0.18446	0.2871	33.247	11	2	Leave out requantified	0.167	0.22502	38.551	11	2	Leave out requantified	0.97129	0.86741	11.271	11	2
A0A0R4J963	A0A0R4J963	29	29	23			tr|A0A0R4J963|A0A0R4J963_LEIDB Elongation factor 1-alpha OS=Leishmania donovani (strain BPK282A1) GN=LDBPK_170170 PE=3 SV=1	non-human	1	29	29	23	21	26	26	21	26	26	16	20	21	64.4	64.4	61.9	49.128	449	449	0	153.29	By MS/MS	By MS/MS	By MS/MS	0.20684	0.30714	40.848	99	42	Leave out requantified	0.20667	0.28417	46.677	97	40	Leave out requantified	1.0289	0.93881	18.949	97	40
E9BI11;E9BC42;A0A0R4J969	E9BI11;E9BC42;A0A0R4J969	7;7;7	7;7;7	3;3;3			tr|E9BI11|E9BI11_LEIDB Histone H4 OS=Leishmania donovani (strain BPK282A1) GN=LDBPK_210020 PE=3 SV=1;tr|E9BC42|E9BC42_LEIDB Histone H4 OS=Leishmania donovani (strain BPK282A1) GN=LDBPK_150010 PE=4 SV=1;tr|A0A0R4J969|A0A0R4J969_LEIDB Histone H4 OS=Leishmani	non-human	3	7	7	3	5	6	5	5	6	5	3	3	3	52	52	21	11.452	100	100;100;100	0	20.784	By MS/MS	By MS/MS	By MS/MS	0.15351	0.31357	107.58	12	10	Median	0.045414	0.19435	111.69	10	8	Linear	0.57503	0.56083	46.681	10	8
A0A0R4J9A9	A0A0R4J9A9	10	9	9			tr|A0A0R4J9A9|A0A0R4J9A9_LEIDB Glucose-6-phosphate isomerase OS=Leishmania donovani (strain BPK282A1) GN=LDBPK_120490 PE=3 SV=1	non-human	1	10	9	9	4	4	9	3	3	8	3	3	8	25.6	24.3	24.3	67.066	605	605	0	46.233	By MS/MS	By MS/MS	By MS/MS	0.37886	0.61924	52.836	10	9	Median	0.26208	0.50377	42.489	8	7	Median	0.6064	0.57006	43.386	8	7
H0YNC7;F5H7S3;H7BYY1;H0YKJ4;H0YK48;B7Z596;A0A0S2Z4G6;Q6ZN40;P09493;H0YKX5;H0YK20;H0YL42;A0A2R8Y6A3	H0YNC7;F5H7S3;H7BYY1;H0YKJ4;H0YK48;B7Z596;A0A0S2Z4G6;Q6ZN40;P09493;H0YKX5	8;8;8;8;8;8;8;8;8;7;1;1;1	1;1;1;1;1;1;1;1;1;1;1;1;0	1;1;1;1;1;1;1;1;1;1;1;1;0	Tropomyosin alpha-1 chain	TPM1	tr|H0YNC7|H0YNC7_HUMAN Tropomyosin alpha-1 chain (Fragment) OS=Homo sapiens OX=9606 GN=TPM1 PE=1 SV=1;tr|F5H7S3|F5H7S3_HUMAN Tropomyosin alpha-1 chain OS=Homo sapiens OX=9606 GN=TPM1 PE=1 SV=2;tr|H7BYY1|H7BYY1_HUMAN Tropomyosin 1 (Alpha), isoform CRA_m OS=	TRUE	13	8	1	1	4	8	7	0	1	0	0	1	0	28.3	6.3	6.3	25.47	223	223;245;248;248;248;275;284;326;284;142;92;108;133	1	-2	By matching	By MS/MS	By matching	NaN	NaN	NaN	1	0	Median	NaN	NaN	NaN	1	0	Median	NaN	NaN	NaN	1	0
Q9H993;F5GZY1	Q9H993;F5GZY1	4;3	4;3	4;3	Protein-glutamate O-methyltransferase	ARMT1	sp|Q9H993|ARMT1_HUMAN Protein-glutamate O-methyltransferase OS=Homo sapiens OX=9606 GN=ARMT1 PE=1 SV=1;tr|F5GZY1|F5GZY1_HUMAN Protein-glutamate O-methyltransferase OS=Homo sapiens OX=9606 GN=ARMT1 PE=1 SV=1	TRUE	2	4	4	4	4	1	2	4	1	2	4	1	2	13.8	13.8	13.8	51.172	441	441;322	0	10.821	By MS/MS	By MS/MS	By MS/MS	0.57451	0.8555	31.779	6	1	Leave out requantified	0.68759	0.87302	22.923	6	1	Leave out requantified	1.0892	0.98697	20.438	6	1
E3W994;H0Y5T1;J3KR49;A0A0U1RQI6;F8WA11;E7ERI8;E7EW49;O75122;Q7Z460	E3W994;H0Y5T1;J3KR49;A0A0U1RQI6;F8WA11;E7ERI8;E7EW49;O75122;Q7Z460	1;1;1;1;1;1;1;1;1	1;1;1;1;1;1;1;1;1	1;1;1;1;1;1;1;1;1	CLIP-associating protein 2;CLIP-associating protein 1	CLASP2;CLASP1	tr|E3W994|E3W994_HUMAN CLIP-associating protein 2 OS=Homo sapiens OX=9606 GN=CLASP2 PE=1 SV=2;tr|H0Y5T1|H0Y5T1_HUMAN CLIP-associating protein 1 (Fragment) OS=Homo sapiens OX=9606 GN=CLASP1 PE=1 SV=2;tr|J3KR49|J3KR49_HUMAN CLIP-associating protein 2 OS=Homo	TRUE	9	1	1	1	0	0	1	0	0	1	0	0	1	0.9	0.9	0.9	138.86	1273	1273;1275;1293;1304;1478;1513;1514;1294;1538	0.0079584	1.8178			By MS/MS	NaN	NaN	NaN	1	1	Median	NaN	NaN	NaN	1	1	Median	NaN	NaN	NaN	1	1
A0A0U1RQT9;C9JYN0;Q16563	A0A0U1RQT9;C9JYN0;Q16563	1;1;1	1;1;1	1;1;1	Synaptophysin-like protein 1	SYPL1	tr|A0A0U1RQT9|A0A0U1RQT9_HUMAN Synaptophysin-like protein 1 (Fragment) OS=Homo sapiens OX=9606 GN=SYPL1 PE=1 SV=1;tr|C9JYN0|C9JYN0_HUMAN Synaptophysin-like protein 1 OS=Homo sapiens OX=9606 GN=SYPL1 PE=1 SV=1;sp|Q16563|SYPL1_HUMAN Synaptophysin-like protei	TRUE	3	1	1	1	1	1	1	1	1	1	1	1	1	8.1	8.1	8.1	14.967	135	135;224;259	0	5.8831	By MS/MS	By MS/MS	By MS/MS	0.50713	1.0728	3.1424	3	0	Median	0.90896	1.8116	8.2018	3	0	Median	1.3715	1.3668	13.322	3	0
Q13464;A0A0U1RQV4;C9JFJ0	Q13464;A0A0U1RQV4	3;3;1	2;2;0	2;2;0	Rho-associated protein kinase 1	ROCK1	sp|Q13464|ROCK1_HUMAN Rho-associated protein kinase 1 OS=Homo sapiens OX=9606 GN=ROCK1 PE=1 SV=1;tr|A0A0U1RQV4|A0A0U1RQV4_HUMAN Rho-associated protein kinase 1 OS=Homo sapiens OX=9606 GN=ROCK1 PE=1 SV=1	TRUE	3	3	2	2	2	2	0	2	1	0	2	1	0	2.7	2	2	158.17	1354	1354;1137;203	0.004164	2.1821	By MS/MS	By MS/MS		0.74691	0.96593	25.884	3	1	Median	0.79207	0.94884	14.3	3	1	Plateau	1.1976	1.0511	44.497	3	1
P84090;G3V279	P84090	5;2	5;2	5;2	Enhancer of rudimentary homolog	ERH	sp|P84090|ERH_HUMAN Enhancer of rudimentary homolog OS=Homo sapiens OX=9606 GN=ERH PE=1 SV=1	TRUE	2	5	5	5	4	3	4	4	3	4	4	3	4	31.7	31.7	31.7	12.259	104	104;71	0	52.348	By MS/MS	By MS/MS	By MS/MS	0.64001	0.94943	27.322	15	5	Leave out requantified	0.70544	0.9358	21.903	16	5	Leave out requantified	1.0941	0.97014	15.22	16	5
A0A1C7CYX9;Q16555;E5RFU4;Q14195;H0YBT4;E9PD68;Q14194;D6RF19	A0A1C7CYX9;Q16555	27;27;4;4;3;3;3;1	27;27;4;4;3;3;3;1	27;27;4;4;3;3;3;1	Dihydropyrimidinase-related protein 2	DPYSL2	tr|A0A1C7CYX9|A0A1C7CYX9_HUMAN Dihydropyrimidinase-related protein 2 OS=Homo sapiens OX=9606 GN=DPYSL2 PE=1 SV=1;sp|Q16555|DPYL2_HUMAN Dihydropyrimidinase-related protein 2 OS=Homo sapiens OX=9606 GN=DPYSL2 PE=1 SV=1	TRUE	8	27	27	27	22	26	24	22	26	24	22	26	24	55.5	55.5	55.5	73.502	677	677;572;170;570;209;570;572;92	0	323.31	By MS/MS	By MS/MS	By MS/MS	0.90398	1.4623	13.333	109	35	Leave out requantified	0.52873	0.74763	23.086	109	35	Leave out requantified	0.56242	0.50852	13.582	109	35
A0A0U1RR32;A0A0U1RRH7;Q99878;Q96KK5;Q9BTM1;P20671;P0C0S8;H0YFX9;A0A3B3IS11;REV__H0Y672;REV__E7EQ67;REV__H7BY63;REV__H0YBA5;REV__A0A087X2A7;REV__Q8NB25	A0A0U1RR32;A0A0U1RRH7;Q99878;Q96KK5;Q9BTM1;P20671;P0C0S8;H0YFX9;A0A3B3IS11	9;9;9;9;9;9;9;8;5;1;1;1;1;1;1	1;1;1;1;1;1;1;1;1;0;0;0;0;0;0	0;0;0;0;0;0;0;0;0;0;0;0;0;0;0	Histone H2A type 1-J;Histone H2A type 1-H;Histone H2A.J;Histone H2A type 1-D;Histone H2A type 1;Histone H2A	HIST1H2AJ;HIST1H2AH;H2AFJ;HIST1H2AD;HIST1H2AG	tr|A0A0U1RR32|A0A0U1RR32_HUMAN Histone H2A OS=Homo sapiens OX=9606 GN=hCG_2039566 PE=3 SV=1;tr|A0A0U1RRH7|A0A0U1RRH7_HUMAN Histone H2A OS=Homo sapiens OX=9606 PE=3 SV=1;sp|Q99878|H2A1J_HUMAN Histone H2A type 1-J OS=Homo sapiens OX=9606 GN=HIST1H2AJ PE=1 SV	TRUE	15	9	1	0	8	9	8	0	1	0	0	0	0	45	17.2	0	18.481	169	169;170;128;128;129;130;130;92;140;141;529;936;996;1098;1140	0	15.204	By matching	By MS/MS	By matching	NaN	NaN	NaN	1	1	Median	NaN	NaN	NaN	1	1	Median	NaN	NaN	NaN	1	1
Q96SL4	Q96SL4	2	2	2	Glutathione peroxidase 7	GPX7	sp|Q96SL4|GPX7_HUMAN Glutathione peroxidase 7 OS=Homo sapiens OX=9606 GN=GPX7 PE=1 SV=1	TRUE	1	2	2	2	2	2	0	2	2	0	2	2	0	19.3	19.3	19.3	20.996	187	187	0	4.3141	By MS/MS	By MS/MS		0.52566	0.83073	7.2853	4	2	Median	0.65016	0.8953	17.417	4	2	Median	1.2624	1.1404	22.898	4	2
O75477;B0QZ43	O75477;B0QZ43	7;5	4;2	4;2	Erlin-1	ERLIN1	sp|O75477|ERLN1_HUMAN Erlin-1 OS=Homo sapiens OX=9606 GN=ERLIN1 PE=1 SV=1;tr|B0QZ43|B0QZ43_HUMAN Erlin-1 (Fragment) OS=Homo sapiens OX=9606 GN=ERLIN1 PE=1 SV=1	TRUE	2	7	4	4	5	6	5	2	3	2	2	3	2	27.2	18.2	18.2	38.925	346	346;275	0	11.102	By MS/MS	By MS/MS	By MS/MS	0.52356	0.87653	43.905	7	5	Median	0.59671	0.83813	16.342	7	5	Median	0.96034	0.82667	31.19	7	5
A0A0U1RRM8;H0YJ34;Q96AC1;H0YJB6	A0A0U1RRM8;H0YJ34;Q96AC1;H0YJB6	2;2;2;1	2;2;2;1	2;2;2;1	Fermitin family homolog 2	FERMT2	tr|A0A0U1RRM8|A0A0U1RRM8_HUMAN Fermitin family homolog 2 (Fragment) OS=Homo sapiens OX=9606 GN=FERMT2 PE=1 SV=1;tr|H0YJ34|H0YJ34_HUMAN Fermitin family homolog 2 (Fragment) OS=Homo sapiens OX=9606 GN=FERMT2 PE=1 SV=1;sp|Q96AC1|FERM2_HUMAN Fermitin family ho	TRUE	4	2	2	2	1	2	0	1	2	0	1	2	0	7	7	7	61.796	545	545;640;680;133	0	11.082	By MS/MS	By MS/MS		0.59669	1.2101	26.407	3	0	Median	0.67938	1.4849	35.328	3	0	Median	0.68734	0.71406	26.571	3	0
P30508;A0A140T912;A0A140T930;A0A140T937;A0A1W2PRZ0;Q29960;A0A140T962;A0A140T9J9;A0A140T9B3;A0A140T9M5;A0A1W2PR11;P30510;Q29963;Q07000;P30504;Q29865;P30505;A0A0G2JIF0;Q9TNN7;P30501;A0A140T9E1;A0A140T9Z4;A0A1W2PRX1;A2BF26;A0A0G2JH50;A0A1W2PP77;A0A140T942;A0A140TA03;A0A140TA05;A0A140T9L3;F8W9Z8;A0A140T9S7;A0A140TA19;A0A140T9Q4;A0A0G2JKJ1;A0A140T9Z7;A0A140TA12	P30508;A0A140T912;A0A140T930;A0A140T937;A0A1W2PRZ0;Q29960;A0A140T962;A0A140T9J9;A0A140T9B3;A0A140T9M5;A0A1W2PR11;P30510;Q29963;Q07000;P30504;Q29865;P30505;A0A0G2JIF0;Q9TNN7;P30501;A0A140T9E1;A0A140T9Z4;A0A1W2PRX1;A2BF26;A0A0G2JH50;A0A1W2PP77;A0A140T942	8;8;8;8;8;7;6;6;6;6;6;6;6;6;5;5;5;4;4;4;4;4;4;4;4;4;4;3;3;3;2;2;2;2;2;2;1	3;3;3;3;3;2;2;2;2;3;2;2;2;2;1;2;3;2;2;1;2;2;1;2;2;1;2;2;1;1;1;2;2;2;2;1;0	0;0;0;0;0;0;0;0;0;0;0;0;0;0;0;0;0;0;0;0;0;0;0;0;0;0;0;0;0;0;0;0;0;0;0;0;0	HLA class I histocompatibility antigen, Cw-12 alpha chain;HLA class I histocompatibility antigen, Cw-16 alpha chain;HLA class I histocompatibility antigen, Cw-14 alpha chain;HLA class I histocompatibility antigen, Cw-6 alpha chain;HLA class I histocompatibility antigen, Cw-15 alpha chain;HLA class I histocompatibility antigen, Cw-4 alpha chain;HLA class I histocompatibility antigen, Cw-18 alpha c…	HLA-C	sp|P30508|1C12_HUMAN HLA class I histocompatibility antigen, Cw-12 alpha chain OS=Homo sapiens OX=9606 GN=HLA-C PE=1 SV=2;tr|A0A140T912|A0A140T912_HUMAN HLA class I histocompatibility antigen, Cw-6 alpha chain OS=Homo sapiens OX=9606 GN=HLA-C PE=1 SV=1;tr|	TRUE	37	8	3	0	8	7	7	3	2	2	0	0	0	31.1	11.7	0	40.885	366	366;372;397;339;325;366;368;372;397;261;325;366;366;366;366;366;366;368;366;366;261;131;244;397;372;244;261;131;224;261;131;261;224;261;131;131;131	0	18.838	By MS/MS	By MS/MS	By MS/MS	0.44195	0.84228	15.85	8	4	Leave out requantified	0.50863	0.90207	2.2948	8	4	Leave out requantified	1.1993	1.1258	35.564	8	4
O43681;A0A087WXS7;K7ERW9	O43681;A0A087WXS7	3;3;1	3;3;1	3;3;1	ATPase ASNA1	ASNA1	sp|O43681|ASNA_HUMAN ATPase ASNA1 OS=Homo sapiens OX=9606 GN=ASNA1 PE=1 SV=2;tr|A0A087WXS7|A0A087WXS7_HUMAN ATPase ASNA1 OS=Homo sapiens OX=9606 GN=ASNA1 PE=1 SV=1	TRUE	3	3	3	3	3	3	2	3	3	2	3	3	2	10.1	10.1	10.1	38.792	348	348;331;200	0	8.4299	By MS/MS	By MS/MS	By MS/MS	0.45809	0.93939	51.47	8	3	Leave out requantified	0.64915	1.1199	10.654	8	3	Leave out requantified	0.98864	1.0296	48.013	8	3
O43747;B3KNW1	O43747	8;1	8;1	8;1	AP-1 complex subunit gamma-1	AP1G1	sp|O43747|AP1G1_HUMAN AP-1 complex subunit gamma-1 OS=Homo sapiens OX=9606 GN=AP1G1 PE=1 SV=5	TRUE	2	8	8	8	6	7	6	6	7	6	6	7	6	14.6	14.6	14.6	91.35	822	822;247	0	27.391	By MS/MS	By MS/MS	By MS/MS	0.53096	0.95768	22.979	19	16	Median	0.56067	1.0403	20.126	18	15	Median	1.1032	1.0333	29.927	18	15
O75787;A0A1B0GTB0;A0A1C7CYW4;A0A1B0GW13;A0A1B0GV60;A0A1B0GVW0;A0A1B0GWJ8;H7C3E1;A0A1B0GUT7;A0A1B0GVB9;A0A1B0GTU8;A0A1B0GVZ1;B7Z413;H7C240;B7Z1I9;A0A1B0GVC7;A0A1B0GV24;A0A1B0GU12	O75787;A0A1B0GTB0;A0A1C7CYW4;A0A1B0GW13;A0A1B0GV60;A0A1B0GVW0;A0A1B0GWJ8;H7C3E1;A0A1B0GUT7;A0A1B0GVB9;A0A1B0GTU8;A0A1B0GVZ1;B7Z413;H7C240;B7Z1I9;A0A1B0GVC7;A0A1B0GV24;A0A1B0GU12	2;2;2;2;2;2;2;2;2;2;1;1;1;1;1;1;1;1	2;2;2;2;2;2;2;2;2;2;1;1;1;1;1;1;1;1	2;2;2;2;2;2;2;2;2;2;1;1;1;1;1;1;1;1	Renin receptor	ATP6AP2	sp|O75787|RENR_HUMAN Renin receptor OS=Homo sapiens OX=9606 GN=ATP6AP2 PE=1 SV=2;tr|A0A1B0GTB0|A0A1B0GTB0_HUMAN Renin receptor (Fragment) OS=Homo sapiens OX=9606 GN=ATP6AP2 PE=1 SV=1;tr|A0A1C7CYW4|A0A1C7CYW4_HUMAN Renin receptor OS=Homo sapiens OX=9606 GN=	TRUE	18	2	2	2	1	1	1	1	1	1	1	1	1	7.4	7.4	7.4	39.008	350	350;294;349;186;209;345;258;262;331;317;301;101;274;128;272;242;143;273	0	14.178	By MS/MS	By MS/MS	By MS/MS	0.41671	0.71501	78.461	2	2	Median	0.54104	0.90706	49.158	2	2	Median	1.2984	1.3067	33.753	2	2
Q5JRI1;O75494;Q6IQ42;R4GMP8;Q8WXF0	Q5JRI1;O75494;Q6IQ42	5;5;3;1;1	5;5;3;1;1	5;5;3;1;1	Serine/arginine-rich splicing factor 10	SRSF10;FUSIP1	tr|Q5JRI1|Q5JRI1_HUMAN Serine/arginine-rich-splicing factor 10 OS=Homo sapiens OX=9606 GN=SRSF10 PE=1 SV=1;sp|O75494|SRS10_HUMAN Serine/arginine-rich splicing factor 10 OS=Homo sapiens OX=9606 GN=SRSF10 PE=1 SV=1;tr|Q6IQ42|Q6IQ42_HUMAN FUSIP1 protein OS=Ho	TRUE	5	5	5	5	5	5	4	5	5	4	5	5	4	37.2	37.2	37.2	20.913	172	172;262;69;40;261	0	36.338	By MS/MS	By MS/MS	By MS/MS	0.43429	0.68788	44.603	14	6	Leave out requantified	0.44569	0.65745	11.91	13	5	Leave out requantified	0.86631	0.84752	15.591	12	5
A0A1B0GTZ8;X6R3I0;A0A1B0GUY7;A0A1B0GTI3;A0A1B0GUC3;A0A1B0GV98;A0A1B0GTC5;A0A1B0GU26;A0A1B0GTC3;A0A1B0GVH5;Q9C0B1	A0A1B0GTZ8;X6R3I0;A0A1B0GUY7;A0A1B0GTI3;A0A1B0GUC3;A0A1B0GV98;A0A1B0GTC5;A0A1B0GU26;A0A1B0GTC3;A0A1B0GVH5;Q9C0B1	1;1;1;1;1;1;1;1;1;1;1	1;1;1;1;1;1;1;1;1;1;1	1;1;1;1;1;1;1;1;1;1;1	Alpha-ketoglutarate-dependent dioxygenase FTO	FTO	tr|A0A1B0GTZ8|A0A1B0GTZ8_HUMAN Alpha-ketoglutarate-dependent dioxygenase FTO (Fragment) OS=Homo sapiens OX=9606 GN=FTO PE=1 SV=1;tr|X6R3I0|X6R3I0_HUMAN Alpha-ketoglutarate-dependent dioxygenase FTO (Fragment) OS=Homo sapiens OX=9606 GN=FTO PE=1 SV=1;tr|A0A	TRUE	11	1	1	1	1	0	0	1	0	0	1	0	0	21.2	21.2	21.2	7.6799	66	66;129;173;275;450;455;457;481;533;559;505	0.003871	2.2652	By MS/MS			NaN	NaN	NaN	1	1	Median	NaN	NaN	NaN	1	1	Median	NaN	NaN	NaN	1	1
Q08AM6;H3BUU8;H3BN23	Q08AM6;H3BUU8	7;4;1	7;4;1	7;4;1	Protein VAC14 homolog	VAC14	sp|Q08AM6|VAC14_HUMAN Protein VAC14 homolog OS=Homo sapiens OX=9606 GN=VAC14 PE=1 SV=1;tr|H3BUU8|H3BUU8_HUMAN Protein VAC14 homolog OS=Homo sapiens OX=9606 GN=VAC14 PE=1 SV=1	TRUE	3	7	7	7	5	6	5	5	6	5	5	6	5	12.8	12.8	12.8	87.972	782	782;201;40	0	32.611	By MS/MS	By MS/MS	By MS/MS	0.61831	1.1691	26.638	18	9	Leave out requantified	0.82139	1.3009	9.8316	18	9	Leave out requantified	1.272	1.3107	19.626	18	9
A0A1B0GV06;A0A1B0GTP7;A0A1B0GUE3;A0A1B0GUG1;A0A1B0GUW4;E7EMM4;A0A1B0GW68;A0A1B0GUA4;A0A1B0GTM3;A0A1B0GTZ5;A0A1B0GUH5;Q13510	A0A1B0GV06;A0A1B0GTP7;A0A1B0GUE3;A0A1B0GUG1;A0A1B0GUW4;E7EMM4;A0A1B0GW68;A0A1B0GUA4;A0A1B0GTM3;A0A1B0GTZ5;A0A1B0GUH5;Q13510	1;1;1;1;1;1;1;1;1;1;1;1	1;1;1;1;1;1;1;1;1;1;1;1	1;1;1;1;1;1;1;1;1;1;1;1	Acid ceramidase;Acid ceramidase subunit alpha;Acid ceramidase subunit beta	ASAH1	tr|A0A1B0GV06|A0A1B0GV06_HUMAN Acid ceramidase (Fragment) OS=Homo sapiens OX=9606 GN=ASAH1 PE=1 SV=1;tr|A0A1B0GTP7|A0A1B0GTP7_HUMAN Acid ceramidase OS=Homo sapiens OX=9606 GN=ASAH1 PE=1 SV=1;tr|A0A1B0GUE3|A0A1B0GUE3_HUMAN Acid ceramidase OS=Homo sapiens OX	TRUE	12	1	1	1	1	1	1	1	1	1	1	1	1	11.5	11.5	11.5	22.837	200	200;288;330;366;368;370;374;375;376;386;393;395	0	11.118	By MS/MS	By MS/MS	By MS/MS	1.5893	2.2223	30.611	3	3	Median	0.36946	0.5011	2.2694	3	3	Median	0.25886	0.2197	28.323	3	3
P29728;A0A087X0V5;F8W1C5	P29728;A0A087X0V5	12;12;3	12;12;3	12;12;3	2-5-oligoadenylate synthase 2	OAS2	sp|P29728|OAS2_HUMAN 2-5-oligoadenylate synthase 2 OS=Homo sapiens OX=9606 GN=OAS2 PE=1 SV=3;tr|A0A087X0V5|A0A087X0V5_HUMAN 2-5-oligoadenylate synthase 2 OS=Homo sapiens OX=9606 GN=OAS2 PE=1 SV=1	TRUE	3	12	12	12	10	9	12	10	9	12	10	9	12	16	16	16	82.43	719	719;726;270	0	69.071	By MS/MS	By MS/MS	By MS/MS	0.63399	0.95403	23.476	32	12	Leave out requantified	1.3878	1.8684	19.354	33	12	Leave out requantified	2.0563	1.9494	18.469	33	12
P62701	P62701	21	21	9	40S ribosomal protein S4, X isoform	RPS4X	sp|P62701|RS4X_HUMAN 40S ribosomal protein S4, X isoform OS=Homo sapiens OX=9606 GN=RPS4X PE=1 SV=2	TRUE	1	21	21	9	21	19	19	21	19	19	9	7	7	65.4	65.4	33.5	29.597	263	263	0	139.59	By MS/MS	By MS/MS	By MS/MS	0.49167	0.84722	38.025	71	13	Leave out requantified	0.57348	0.93913	34.48	71	13	Leave out requantified	1.1511	1.0757	13.299	71	13
O15294;C9JZL3	O15294	7;1	7;1	7;1	UDP-N-acetylglucosamine--peptide N-acetylglucosaminyltransferase 110 kDa subunit	OGT	sp|O15294|OGT1_HUMAN UDP-N-acetylglucosamine--peptide N-acetylglucosaminyltransferase 110 kDa subunit OS=Homo sapiens OX=9606 GN=OGT PE=1 SV=3	TRUE	2	7	7	7	2	6	3	2	6	3	2	6	3	10.5	10.5	10.5	116.92	1046	1046;156	0	26.488	By MS/MS	By MS/MS	By MS/MS	0.78705	1.2541	17.583	9	7	Median	0.84693	1.1835	17.935	9	7	Median	1.1092	0.99476	31.762	9	7
A0A1B0GUZ7;Q14156	A0A1B0GUZ7;Q14156	1;1	1;1	1;1	Protein EFR3 homolog A	EFR3A	tr|A0A1B0GUZ7|A0A1B0GUZ7_HUMAN Protein EFR3 homolog A OS=Homo sapiens OX=9606 GN=EFR3A PE=1 SV=1;sp|Q14156|EFR3A_HUMAN Protein EFR3 homolog A OS=Homo sapiens OX=9606 GN=EFR3A PE=1 SV=2	TRUE	2	1	1	1	1	1	0	1	1	0	1	1	0	1.9	1.9	1.9	96.13	848	848;821	0.0091575	1.8003	By MS/MS	By MS/MS		NaN	NaN	NaN	1	0	Median	NaN	NaN	NaN	1	0	Median	0.92003	0.88203	11.755	2	0
P37108;H0YLA2;H0YLW0	P37108;H0YLA2	7;4;1	7;4;1	7;4;1	Signal recognition particle 14 kDa protein	SRP14	sp|P37108|SRP14_HUMAN Signal recognition particle 14 kDa protein OS=Homo sapiens OX=9606 GN=SRP14 PE=1 SV=2;tr|H0YLA2|H0YLA2_HUMAN Signal recognition particle 14 kDa protein OS=Homo sapiens OX=9606 GN=SRP14 PE=1 SV=1	TRUE	3	7	7	7	7	5	4	7	5	4	7	5	4	64	64	64	14.57	136	136;115;56	0	39.807	By MS/MS	By MS/MS	By MS/MS	0.48785	0.80424	22.986	14	0	Leave out requantified	0.53269	1.0148	20.501	14	0	Leave out requantified	1.2028	1.1388	24.271	14	0
P51153;A0A087WWB9	P51153;A0A087WWB9	7;4	4;3	4;3	Ras-related protein Rab-13	RAB13	sp|P51153|RAB13_HUMAN Ras-related protein Rab-13 OS=Homo sapiens OX=9606 GN=RAB13 PE=1 SV=1;tr|A0A087WWB9|A0A087WWB9_HUMAN Ras-related protein Rab-13 OS=Homo sapiens OX=9606 GN=RAB13 PE=1 SV=1	TRUE	2	7	4	4	6	7	7	3	4	4	3	4	4	36	23.2	23.2	22.774	203	203;122	0	23.98	By MS/MS	By MS/MS	By MS/MS	0.64599	1.2624	10.388	12	1	Leave out requantified	0.60807	1.1632	14.951	12	1	Leave out requantified	1.0396	1.042	23.667	12	1
E5RJ57;A8MWW6;A0A286YFK3;A0A286YEQ0;A0A286YEQ7;A0A286YEX7;A0A286YFC0;A0A1P0B7D2;A0A286YFJ6;A0A286YFJ4;A0A286YEY0;A0A286YFD7;A0A286YES9;A0A286YEN5;A0A286YF85;A0A286YF97;A0A286YFA6;A0A286YF62;D6RJF9;A0A286YF19;A0A286YF35;P45984;D6R9C1;A0A1W2PRF2;A0A286YFE2;D7R525;D6RCB1;A0A286YF83;A0A286YF02;J3KNK1;A0A286YFI3;A0A286YEV3;A0A286YES0;A0A286YFN2;A0A286YFB6;A0A286YFM6;A0A286YEW9;P53779	E5RJ57;A8MWW6;A0A286YFK3;A0A286YEQ0;A0A286YEQ7;A0A286YEX7;A0A286YFC0;A0A1P0B7D2;A0A286YFJ6;A0A286YFJ4;A0A286YEY0;A0A286YFD7;A0A286YES9;A0A286YEN5;A0A286YF85;A0A286YF97;A0A286YFA6;A0A286YF62;D6RJF9;A0A286YF19;A0A286YF35;P45984;D6R9C1;A0A1W2PRF2;A0A286YFE2;D7R525;D6RCB1;A0A286YF83;A0A286YF02;J3KNK1;A0A286YFI3;A0A286YEV3;A0A286YES0;A0A286YFN2;A0A286YFB6;A0A286YFM6;A0A286YEW9;P53779	1;1;1;1;1;1;1;1;1;1;1;1;1;1;1;1;1;1;1;1;1;1;1;1;1;1;1;1;1;1;1;1;1;1;1;1;1;1	1;1;1;1;1;1;1;1;1;1;1;1;1;1;1;1;1;1;1;1;1;1;1;1;1;1;1;1;1;1;1;1;1;1;1;1;1;1	1;1;1;1;1;1;1;1;1;1;1;1;1;1;1;1;1;1;1;1;1;1;1;1;1;1;1;1;1;1;1;1;1;1;1;1;1;1	Mitogen-activated protein kinase 9;Mitogen-activated protein kinase 10	MAPK9;MAPK10	tr|E5RJ57|E5RJ57_HUMAN Mitogen-activated protein kinase 9 (Fragment) OS=Homo sapiens OX=9606 GN=MAPK9 PE=1 SV=8;tr|A8MWW6|A8MWW6_HUMAN Mitogen-activated protein kinase OS=Homo sapiens OX=9606 GN=MAPK10 PE=4 SV=3;tr|A0A286YFK3|A0A286YFK3_HUMAN Mitogen-activ	TRUE	38	1	1	1	1	0	1	1	0	1	1	0	1	12.6	12.6	12.6	11.579	103	103;422;119;384;402;409;412;422;422;425;338;426;427;435;451;464;467;473;384;376;375;424;158;178;208;214;245;300;308;339;384;346;350;360;363;371;551;464	0.00035714	3.3791	By MS/MS		By MS/MS	0.48664	0.66826	12.728	2	1	Median	0.52845	0.64976	3.0639	2	1	Median	1.0728	0.9775	12.827	2	1
A0A1W2PNR9;Q9Y5U9	A0A1W2PNR9;Q9Y5U9	2;2	2;2	2;2	Immediate early response 3-interacting protein 1	IER3IP1	tr|A0A1W2PNR9|A0A1W2PNR9_HUMAN Immediate early response 3-interacting protein 1 OS=Homo sapiens OX=9606 GN=IER3IP1 PE=1 SV=1;sp|Q9Y5U9|IR3IP_HUMAN Immediate early response 3-interacting protein 1 OS=Homo sapiens OX=9606 GN=IER3IP1 PE=1 SV=1	TRUE	2	2	2	2	2	1	2	2	1	2	2	1	2	40.6	40.6	40.6	7.6079	69	69;82	0	65.862	By MS/MS	By MS/MS	By MS/MS	0.67083	0.94075	9.1034	4	2	Linear	0.72918	1.0723	10.924	4	2	Median	1.1412	1.0822	14.821	4	2
A0A1W2PNV4;E9PF58	A0A1W2PNV4	16;3	3;3	0;0			tr|A0A1W2PNV4|A0A1W2PNV4_HUMAN Uncharacterized protein OS=Homo sapiens OX=9606 PE=4 SV=1	TRUE	2	16	3	0	15	14	15	3	1	2	0	0	0	26.2	7	0	75.872	684	684;279	0	3.7541	By MS/MS	By MS/MS	By MS/MS	0.55489	0.88886	17.426	6	1	Leave out requantified	0.64464	0.77034	42.622	6	1	Leave out requantified	1.2183	1.0665	3.8805	6	1
P00491;G3V5M2;G3V2H3;G3V393	P00491;G3V5M2	22;14;6;4	22;14;6;4	22;14;6;4	Purine nucleoside phosphorylase	PNP	sp|P00491|PNPH_HUMAN Purine nucleoside phosphorylase OS=Homo sapiens OX=9606 GN=PNP PE=1 SV=2;tr|G3V5M2|G3V5M2_HUMAN Purine nucleoside phosphorylase (Fragment) OS=Homo sapiens OX=9606 GN=PNP PE=1 SV=1	TRUE	4	22	22	22	20	21	17	20	21	17	20	21	17	78.5	78.5	78.5	32.118	289	289;221;93;61	0	323.31	By MS/MS	By MS/MS	By MS/MS	0.70427	1.2141	14.005	98	23	Leave out requantified	0.75924	1.1987	17.165	98	23	Leave out requantified	1.0696	1.0289	12.926	98	23
Q14152	Q14152	26	26	26	Eukaryotic translation initiation factor 3 subunit A	EIF3A	sp|Q14152|EIF3A_HUMAN Eukaryotic translation initiation factor 3 subunit A OS=Homo sapiens OX=9606 GN=EIF3A PE=1 SV=1	TRUE	1	26	26	26	23	24	21	23	24	21	23	24	21	23.7	23.7	23.7	166.57	1382	1382	0	104.14	By MS/MS	By MS/MS	By MS/MS	0.54094	0.90726	21.497	74	29	Leave out requantified	0.76839	1.1871	20.029	74	29	Leave out requantified	1.3318	1.2203	21.412	73	29
Q9H845;H0Y8Z9	Q9H845;H0Y8Z9	8;5	8;5	8;5	Acyl-CoA dehydrogenase family member 9, mitochondrial	ACAD9	sp|Q9H845|ACAD9_HUMAN Acyl-CoA dehydrogenase family member 9, mitochondrial OS=Homo sapiens OX=9606 GN=ACAD9 PE=1 SV=1;tr|H0Y8Z9|H0Y8Z9_HUMAN Acyl-CoA dehydrogenase family member 9, mitochondrial (Fragment) OS=Homo sapiens OX=9606 GN=ACAD9 PE=1 SV=1	TRUE	2	8	8	8	7	6	4	7	6	4	7	6	4	15.6	15.6	15.6	68.76	621	621;384	0	42.758	By MS/MS	By MS/MS	By MS/MS	0.6299	0.90731	22.041	17	9	Leave out requantified	0.64073	0.91234	22.161	17	9	Leave out requantified	1.04	0.95451	4.9628	17	9
P17066;P48741	P17066;P48741	12;6	3;3	3;3	Heat shock 70 kDa protein 6;Putative heat shock 70 kDa protein 7	HSPA6;HSPA7	sp|P17066|HSP76_HUMAN Heat shock 70 kDa protein 6 OS=Homo sapiens OX=9606 GN=HSPA6 PE=1 SV=2;sp|P48741|HSP77_HUMAN Putative heat shock 70 kDa protein 7 OS=Homo sapiens OX=9606 GN=HSPA7 PE=5 SV=2	TRUE	2	12	3	3	8	7	12	1	1	3	1	1	3	15.6	4.8	4.8	71.027	643	643;367	0	13.762	By MS/MS	By MS/MS	By MS/MS	0.45699	0.70068	20.766	7	3	Median	0.51231	0.85259	19.509	7	3	Median	1.2268	1.158	7.9285	7	3
P18669;P15259;Q8N0Y7	P18669	13;5;5	13;5;5	13;5;5	Phosphoglycerate mutase 1	PGAM1	sp|P18669|PGAM1_HUMAN Phosphoglycerate mutase 1 OS=Homo sapiens OX=9606 GN=PGAM1 PE=1 SV=2	TRUE	3	13	13	13	11	11	12	11	11	12	11	11	12	55.1	55.1	55.1	28.804	254	254;253;254	0	85.906	By MS/MS	By MS/MS	By MS/MS	0.6147	1.004	33.124	53	4	Leave out requantified	0.94171	1.4723	17.529	53	4	Leave out requantified	1.5448	1.4676	34.616	52	4
E9PNM1;A0A1W2PQ47;P37268	E9PNM1;A0A1W2PQ47;P37268	1;1;1	1;1;1	1;1;1	Squalene synthase	FDFT1	tr|E9PNM1|E9PNM1_HUMAN Squalene synthase OS=Homo sapiens OX=9606 GN=FDFT1 PE=1 SV=1;tr|A0A1W2PQ47|A0A1W2PQ47_HUMAN Squalene synthase OS=Homo sapiens OX=9606 GN=FDFT1 PE=1 SV=1;sp|P37268|FDFT_HUMAN Squalene synthase OS=Homo sapiens OX=9606 GN=FDFT1 PE=1 SV=	TRUE	3	1	1	1	1	1	1	1	1	1	1	1	1	4.4	4.4	4.4	47.285	410	410;476;417	0	22.734	By MS/MS	By MS/MS	By MS/MS	0.41129	0.86677	20.527	3	1	Plateau	0.27446	0.56055	6.4835	3	1	Plateau	0.75005	0.71528	14.577	3	1
A0A0G2JLV0;A0A087WYD6;X5CMH5;Q03519;A0A140T9S0;E7ENX8;Q9NUT2;Q9NRK6	A0A0G2JLV0;A0A087WYD6;X5CMH5;Q03519;A0A140T9S0;E7ENX8	11;11;11;11;9;9;1;1	11;11;11;11;9;9;1;1	11;11;11;11;9;9;1;1	Antigen peptide transporter 2	TAP2	tr|A0A0G2JLV0|A0A0G2JLV0_HUMAN Antigen peptide transporter 2 OS=Homo sapiens OX=9606 GN=TAP2 PE=1 SV=1;tr|A0A087WYD6|A0A087WYD6_HUMAN Antigen peptide transporter 2 OS=Homo sapiens OX=9606 GN=TAP2 PE=1 SV=1;tr|X5CMH5|X5CMH5_HUMAN Antigen peptide transporter	TRUE	8	11	11	11	9	7	9	9	7	9	9	7	9	18.4	18.4	18.4	77.64	702	702;702;703;686;653;843;735;738	0	32.543	By MS/MS	By MS/MS	By MS/MS	0.48566	0.88233	25.789	28	9	Leave out requantified	0.86202	1.5425	13.257	28	9	Leave out requantified	1.7516	1.6934	11.395	28	9
P51531;A0A0U1RQZ9;A0A0U1RRJ8;A0A2R8YGP5;Q9HBD4;A0A2R8Y4P4;A0A2R8Y7S2;F6VDE0;A0A2R8YGG3;A0A2R8YG32;A0A2R8Y440;A0A2R8Y7F3;A0A2R8Y4R6;A0A2R8YF80;A0A2R8Y6N0;A0A2R8Y7Y7;A0A2R8Y526;A0A2R8YF58;A0A2R8Y4C5;A0A2R8Y6V2;A0A2R8YDA1;A0A2R8Y523;A0A2R8YCY3;A0A2R8YFV8;A0A0A0MT49;P51532	P51531;A0A0U1RQZ9;A0A0U1RRJ8;A0A2R8YGP5;Q9HBD4;A0A2R8Y4P4;A0A2R8Y7S2;F6VDE0;A0A2R8YGG3;A0A2R8YG32;A0A2R8Y440;A0A2R8Y7F3;A0A2R8Y4R6;A0A2R8YF80;A0A2R8Y6N0;A0A2R8Y7Y7;A0A2R8Y526;A0A2R8YF58;A0A2R8Y4C5;A0A2R8Y6V2;A0A2R8YDA1;A0A2R8Y523;A0A2R8YCY3;A0A2R8YFV8;A0A0A0MT49;P51532	2;2;1;1;1;1;1;1;1;1;1;1;1;1;1;1;1;1;1;1;1;1;1;1;1;1	2;2;1;1;1;1;1;1;1;1;1;1;1;1;1;1;1;1;1;1;1;1;1;1;1;1	2;2;1;1;1;1;1;1;1;1;1;1;1;1;1;1;1;1;1;1;1;1;1;1;1;1	Probable global transcription activator SNF2L2;Transcription activator BRG1	SMARCA2;SMARCA4	sp|P51531|SMCA2_HUMAN Probable global transcription activator SNF2L2 OS=Homo sapiens OX=9606 GN=SMARCA2 PE=1 SV=2;tr|A0A0U1RQZ9|A0A0U1RQZ9_HUMAN Probable global transcription activator SNF2L2 OS=Homo sapiens OX=9606 GN=SMARCA2 PE=1 SV=1;tr|A0A0U1RRJ8|A0A0U	TRUE	26	2	2	2	2	2	0	2	2	0	2	2	0	2	2	2	181.28	1590	1590;1428;57;1165;1679;1649;1646;1514;1455;1198;1192;1165;234;1094;1145;1081;1068;1065;1047;1041;985;799;385;375;1681;1647	0.0010267	2.8716	By MS/MS	By MS/MS		0.52374	0.97881	22.345	4	2	Median	0.68157	1.1702	50.801	4	2	Median	1.0267	1.0822	86.603	3	2
A0A1W2PQS6;S4R435;O95989	A0A1W2PQS6;S4R435	8;5;2	2;1;2	2;1;2		RPS10-NUDT3	tr|A0A1W2PQS6|A0A1W2PQS6_HUMAN RPS10-NUDT3 readthrough OS=Homo sapiens OX=9606 GN=RPS10-NUDT3 PE=4 SV=1;tr|S4R435|S4R435_HUMAN RPS10-NUDT3 readthrough (Fragment) OS=Homo sapiens OX=9606 GN=RPS10-NUDT3 PE=4 SV=2	TRUE	3	8	2	2	7	6	5	2	0	1	2	0	1	34	9.3	9.3	33.14	291	291;198;172	0.0013638	2.8236	By MS/MS	By matching	By MS/MS	0.63752	1.3199	21.779	3	2	Median	0.50666	0.70433	17.071	3	2	Plateau	0.79368	0.71391	11.726	3	2
A0A286YET0;Q9H2C8	A0A286YET0;Q9H2C8	1;1	1;1	1;1	Olfactory receptor 51V1	OR51V1	tr|A0A286YET0|A0A286YET0_HUMAN Olfactory receptor OS=Homo sapiens OX=9606 GN=OR51V1 PE=3 SV=1;sp|Q9H2C8|O51V1_HUMAN Olfactory receptor 51V1 OS=Homo sapiens OX=9606 GN=OR51V1 PE=3 SV=2	TRUE	2	1	1	1	1	0	0	1	0	0	1	0	0	2.5	2.5	2.5	36.027	315	315;321	0.0091436	1.7912	By MS/MS			NaN	NaN	NaN	1	0	Median	NaN	NaN	NaN	1	0	Median	NaN	NaN	NaN	1	0
Q5VWZ2	Q5VWZ2	6	6	6	Lysophospholipase-like protein 1	LYPLAL1	sp|Q5VWZ2|LYPL1_HUMAN Lysophospholipase-like protein 1 OS=Homo sapiens OX=9606 GN=LYPLAL1 PE=1 SV=3	TRUE	1	6	6	6	4	4	4	4	4	4	4	4	4	28.7	28.7	28.7	26.316	237	237	0	15.057	By MS/MS	By MS/MS	By MS/MS	0.80634	1.2022	39.366	12	3	Leave out requantified	0.88136	1.1675	30.984	11	2	Leave out requantified	1.1814	1.028	35.618	11	2
Q9UFN0;Q9BS92	Q9UFN0	7;1	7;1	7;1	Protein NipSnap homolog 3A	NIPSNAP3A	sp|Q9UFN0|NPS3A_HUMAN Protein NipSnap homolog 3A OS=Homo sapiens OX=9606 GN=NIPSNAP3A PE=1 SV=2	TRUE	2	7	7	7	7	6	7	7	6	7	7	6	7	36.8	36.8	36.8	28.466	247	247;247	0	30.375	By MS/MS	By MS/MS	By MS/MS	0.59746	1.149	20.541	25	10	Leave out requantified	0.57913	0.94677	30.372	25	10	Leave out requantified	1.0684	0.94306	45.189	25	10
A0A286YFD6;P31350	A0A286YFD6;P31350	3;3	3;3	3;3	Ribonucleoside-diphosphate reductase subunit M2	RRM2	tr|A0A286YFD6|A0A286YFD6_HUMAN Uncharacterized protein OS=Homo sapiens OX=9606 PE=4 SV=1;sp|P31350|RIR2_HUMAN Ribonucleoside-diphosphate reductase subunit M2 OS=Homo sapiens OX=9606 GN=RRM2 PE=1 SV=1	TRUE	2	3	3	3	2	1	1	2	1	1	2	1	1	12.3	12.3	12.3	42.906	374	374;389	0	18.372	By MS/MS	By MS/MS	By MS/MS	0.97566	1.5428	94.378	2	2	Median	NaN	NaN	NaN	1	1	Median	NaN	NaN	NaN	1	1
P61011;G3V4F7;G3V480	P61011;G3V4F7	5;4;1	5;4;1	5;4;1	Signal recognition particle 54 kDa protein	SRP54	sp|P61011|SRP54_HUMAN Signal recognition particle 54 kDa protein OS=Homo sapiens OX=9606 GN=SRP54 PE=1 SV=1;tr|G3V4F7|G3V4F7_HUMAN Signal recognition particle 54 kDa protein OS=Homo sapiens OX=9606 GN=SRP54 PE=1 SV=1	TRUE	3	5	5	5	4	4	2	4	4	2	4	4	2	14.9	14.9	14.9	55.704	504	504;440;74	0	20.892	By MS/MS	By MS/MS	By MS/MS	0.67454	1.0135	32.016	8	6	Median	0.7996	1.1369	30.891	8	6	Median	1.02	0.94248	20.105	8	6
A0A2R8Y6I1;A0A2R8Y3N3;A0A2R8Y5P7;P49590;B4DQ67;D6RB22	A0A2R8Y6I1;A0A2R8Y3N3;A0A2R8Y5P7;P49590;B4DQ67;D6RB22	6;6;6;6;4;4	2;2;2;2;2;2	2;2;2;2;2;2	Probable histidine--tRNA ligase, mitochondrial	HARS2	tr|A0A2R8Y6I1|A0A2R8Y6I1_HUMAN Probable histidine--tRNA ligase, mitochondrial OS=Homo sapiens OX=9606 GN=HARS2 PE=1 SV=1;tr|A0A2R8Y3N3|A0A2R8Y3N3_HUMAN Probable histidine--tRNA ligase, mitochondrial OS=Homo sapiens OX=9606 GN=HARS2 PE=1 SV=1;tr|A0A2R8Y5P7|	TRUE	6	6	2	2	4	4	1	0	2	0	0	2	0	14.4	5.5	5.5	49.246	436	436;473;512;506;334;399	0	4.8393	By matching	By MS/MS	By matching	NaN	NaN	NaN	1	1	Median	NaN	NaN	NaN	1	1	Median	NaN	NaN	NaN	1	1
Q13418;A0A0A0MTH3;A0A087WWY6	Q13418;A0A0A0MTH3	11;11;2	11;11;2	11;11;2	Integrin-linked protein kinase	ILK	sp|Q13418|ILK_HUMAN Integrin-linked protein kinase OS=Homo sapiens OX=9606 GN=ILK PE=1 SV=2;tr|A0A0A0MTH3|A0A0A0MTH3_HUMAN Integrin-linked protein kinase OS=Homo sapiens OX=9606 GN=ILK PE=1 SV=1	TRUE	3	11	11	11	11	9	9	11	9	9	11	9	9	27.7	27.7	27.7	51.419	452	452;483;111	0	37.847	By MS/MS	By MS/MS	By MS/MS	0.57056	0.90086	16.581	30	7	Leave out requantified	0.60866	0.89716	14.528	30	7	Leave out requantified	1.0852	1.0282	13.857	30	7
A6NNI4;A0A2R8Y478;G8JLH6;P21926;A0A087WU13	A6NNI4;A0A2R8Y478;G8JLH6;P21926;A0A087WU13	2;2;2;2;1	2;2;2;2;1	2;2;2;2;1	Tetraspanin;CD9 antigen	CD9	tr|A6NNI4|A6NNI4_HUMAN Tetraspanin OS=Homo sapiens OX=9606 GN=CD9 PE=1 SV=1;tr|A0A2R8Y478|A0A2R8Y478_HUMAN Tetraspanin OS=Homo sapiens OX=9606 GN=CD9 PE=1 SV=1;tr|G8JLH6|G8JLH6_HUMAN Tetraspanin OS=Homo sapiens OX=9606 GN=CD9 PE=1 SV=2;sp|P21926|CD9_HUMAN	TRUE	5	2	2	2	2	2	0	2	2	0	2	2	0	13.8	13.8	13.8	17.764	159	159;159;251;228;182	0	6.1719	By MS/MS	By MS/MS		0.64837	1.1237	10.3	3	1	Plateau	0.55473	0.67946	7.8431	3	1	Plateau	0.62532	0.51884	23.62	3	1
P53041;H0YDU8;A8MU39	P53041;H0YDU8;A8MU39	5;5;3	5;5;3	5;5;3	Serine/threonine-protein phosphatase 5;Serine/threonine-protein phosphatase	PPP5C	sp|P53041|PPP5_HUMAN Serine/threonine-protein phosphatase 5 OS=Homo sapiens OX=9606 GN=PPP5C PE=1 SV=1;tr|H0YDU8|H0YDU8_HUMAN Serine/threonine-protein phosphatase (Fragment) OS=Homo sapiens OX=9606 GN=PPP5C PE=1 SV=1;tr|A8MU39|A8MU39_HUMAN Serine/threonine	TRUE	3	5	5	5	3	5	4	3	5	4	3	5	4	14	14	14	56.878	499	499;485;371	0	48.622	By MS/MS	By MS/MS	By MS/MS	0.67607	1.0729	6.4639	12	7	Leave out requantified	0.59017	0.84877	6.5564	12	7	Leave out requantified	1.0544	0.9236	12.555	12	7
Q6UN15;H0Y8P7;A0A0B4J203	Q6UN15	5;2;2	5;2;2	5;2;2	Pre-mRNA 3-end-processing factor FIP1	FIP1L1	sp|Q6UN15|FIP1_HUMAN Pre-mRNA 3-end-processing factor FIP1 OS=Homo sapiens OX=9606 GN=FIP1L1 PE=1 SV=1	TRUE	3	5	5	5	3	3	4	3	3	4	3	3	4	15.5	15.5	15.5	66.526	594	594;254;849	0	39.653	By MS/MS	By MS/MS	By MS/MS	0.5225	1.0181	17.352	8	1	Leave out requantified	0.65886	1.0066	22.431	8	1	Leave out requantified	1.4371	1.3474	31.962	7	1
E9PDF9;E7EV28;E7EMJ5;A0A2R8Y804;A0A2R8Y543;A0A2R8Y750;A0A2R8YCH5;A0A2R8Y7Z0;A0A2R8Y5A3;P35222	E9PDF9;E7EV28;E7EMJ5;A0A2R8Y804;A0A2R8Y543;A0A2R8Y750;A0A2R8YCH5;A0A2R8Y7Z0;A0A2R8Y5A3;P35222	1;1;1;1;1;1;1;1;1;1	1;1;1;1;1;1;1;1;1;1	1;1;1;1;1;1;1;1;1;1	Catenin beta-1	CTNNB1	tr|E9PDF9|E9PDF9_HUMAN Catenin beta-1 (Fragment) OS=Homo sapiens OX=9606 GN=CTNNB1 PE=1 SV=1;tr|E7EV28|E7EV28_HUMAN Catenin beta-1 (Fragment) OS=Homo sapiens OX=9606 GN=CTNNB1 PE=1 SV=1;tr|E7EMJ5|E7EMJ5_HUMAN Catenin beta-1 (Fragment) OS=Homo sapiens OX=96	TRUE	10	1	1	1	0	1	0	0	1	0	0	1	0	18	18	18	11.104	100	100;108;149;702;715;744;779;780;783;781	0.0073914	1.848		By MS/MS		NaN	NaN	NaN	0	0	Median	NaN	NaN	NaN	0	0	Median	NaN	NaN	NaN	0	0
A0A2R8Y566;Q9P260	A0A2R8Y566;Q9P260	2;2	2;2	2;2	LisH domain and HEAT repeat-containing protein KIAA1468	KIAA1468	tr|A0A2R8Y566|A0A2R8Y566_HUMAN RAB11-binding protein RELCH OS=Homo sapiens OX=9606 GN=RELCH PE=1 SV=1;sp|Q9P260|RELCH_HUMAN RAB11-binding protein RELCH OS=Homo sapiens OX=9606 GN=RELCH PE=1 SV=2	TRUE	2	2	2	2	0	0	2	0	0	2	0	0	2	2.5	2.5	2.5	134.59	1216	1216;1216	0.0091102	1.7647			By MS/MS	0.26169	0.34495	43.671	2	0	Median	0.28587	0.34434	59.839	2	0	Median	0.98689	0.9078	49.222	2	0
A0A2R8YEY5;A0A2R8YEZ4;A0A2R8Y5D3;O15160;D6RDJ3;E7EQB9;H0Y723;A0A2R8Y8D6	A0A2R8YEY5;A0A2R8YEZ4;A0A2R8Y5D3;O15160;D6RDJ3;E7EQB9	3;3;3;3;2;2;1;1	3;3;3;3;2;2;1;1	3;3;3;3;2;2;1;1	DNA-directed RNA polymerases I and III subunit RPAC1	POLR1C	tr|A0A2R8YEY5|A0A2R8YEY5_HUMAN DNA-directed RNA polymerases I and III subunit RPAC1 OS=Homo sapiens OX=9606 GN=POLR1C PE=1 SV=1;tr|A0A2R8YEZ4|A0A2R8YEZ4_HUMAN DNA-directed RNA polymerases I and III subunit RPAC1 OS=Homo sapiens OX=9606 GN=POLR1C PE=1 SV=1;	TRUE	8	3	3	3	3	1	0	3	1	0	3	1	0	18.9	18.9	18.9	32.917	291	291;307;343;346;124;296;140;151	0	13.771	By MS/MS	By MS/MS		0.48175	1.2147	32.193	3	3	Plateau	0.62117	1.2658	8.2299	2	2	Median	1.2894	1.3214	47.024	2	2
Q14534;E7EVQ6;E5RJH9	Q14534;E7EVQ6	5;5;2	5;5;2	5;5;2	Squalene monooxygenase	SQLE	sp|Q14534|ERG1_HUMAN Squalene monooxygenase OS=Homo sapiens OX=9606 GN=SQLE PE=1 SV=3;tr|E7EVQ6|E7EVQ6_HUMAN Squalene monooxygenase OS=Homo sapiens OX=9606 GN=SQLE PE=1 SV=1	TRUE	3	5	5	5	4	1	2	4	1	2	4	1	2	17.9	17.9	17.9	63.922	574	574;479;184	0	10.311	By MS/MS	By MS/MS	By MS/MS	0.75264	1.5939	26.019	6	1	Leave out requantified	1.454	2.1279	58.826	6	1	Leave out requantified	1.9551	1.8325	36.772	6	1
A0A2R8Y5S7;P35241;A0A2R8Y7M3;A0A2R8Y4H6	A0A2R8Y5S7;P35241;A0A2R8Y7M3	21;21;19;2	4;4;2;2	4;4;2;2	Radixin	RDX	tr|A0A2R8Y5S7|A0A2R8Y5S7_HUMAN Radixin OS=Homo sapiens OX=9606 GN=RDX PE=1 SV=1;sp|P35241|RADI_HUMAN Radixin OS=Homo sapiens OX=9606 GN=RDX PE=1 SV=1;tr|A0A2R8Y7M3|A0A2R8Y7M3_HUMAN Radixin OS=Homo sapiens OX=9606 GN=RDX PE=1 SV=1	TRUE	4	21	4	4	16	17	13	1	3	1	1	3	1	28.5	9	9	69.335	590	590;583;534;152	0	5.266	By MS/MS	By MS/MS	By MS/MS	0.54411	0.86612	34.99	3	2	Median	0.58071	0.80091	40.785	3	2	Median	0.97614	0.88461	11.137	3	2
A0A2R8Y5V9;A0A2R8YGX3;A0A2R8YH90;K7ERG3;A0A2R8YEU4;K7EMU5;A0A2R8YHD2;K7EPV9	A0A2R8Y5V9;A0A2R8YGX3;A0A2R8YH90	21;17;16;10;10;5;4;4	1;0;1;0;0;0;0;0	1;0;1;0;0;0;0;0			tr|A0A2R8Y5V9|A0A2R8Y5V9_HUMAN Tropomyosin alpha-4 chain OS=Homo sapiens OX=9606 GN=TPM4 PE=1 SV=1;tr|A0A2R8YGX3|A0A2R8YGX3_HUMAN Tropomyosin alpha-4 chain OS=Homo sapiens OX=9606 GN=TPM4 PE=1 SV=1;tr|A0A2R8YH90|A0A2R8YH90_HUMAN Tropomyosin alpha-4 chain (	TRUE	8	21	1	1	15	19	16	0	1	0	0	1	0	64.1	6.5	6.5	28.609	248	248;183;220;170;173;102;90;96	1	-2	By matching	By MS/MS	By matching	NaN	NaN	NaN	0	0	Median	NaN	NaN	NaN	0	0	Median	NaN	NaN	NaN	0	0
A0A2R8Y619	A0A2R8Y619	4	1	1			tr|A0A2R8Y619|A0A2R8Y619_HUMAN Histone H2B OS=Homo sapiens OX=9606 PE=1 SV=1	TRUE	1	4	1	1	3	2	4	1	0	1	1	0	1	24.6	18	18	13.491	122	122	0.0026281	2.4551	By MS/MS	By matching	By MS/MS	0.43798	0.54727	28.534	2	0	Median	0.42133	0.50523	7.0251	2	0	Median	0.96044	0.9181	14.687	2	0
A0A0B4J1W3;Q9BXJ9;Q6N069	A0A0B4J1W3;Q9BXJ9	13;13;2	13;13;2	13;13;2	N-alpha-acetyltransferase 15, NatA auxiliary subunit	NAA15	tr|A0A0B4J1W3|A0A0B4J1W3_HUMAN N-alpha-acetyltransferase 15, NatA auxiliary subunit OS=Homo sapiens OX=9606 GN=NAA15 PE=1 SV=1;sp|Q9BXJ9|NAA15_HUMAN N-alpha-acetyltransferase 15, NatA auxiliary subunit OS=Homo sapiens OX=9606 GN=NAA15 PE=1 SV=1	TRUE	3	13	13	13	8	11	6	8	11	6	8	11	6	17.2	17.2	17.2	101.2	865	865;866;864	0	31.18	By MS/MS	By MS/MS	By MS/MS	0.61181	0.97441	58.924	21	7	Leave out requantified	0.78304	1.0041	22.927	21	7	Leave out requantified	1.0759	1.0162	63.672	21	7
M0QZB4;A0A2R8Y705;A0A2R8Y7K6;M0QZR8;M0R2B7;P28340	M0QZB4;A0A2R8Y705;A0A2R8Y7K6;M0QZR8;M0R2B7;P28340	1;1;1;1;1;1	1;1;1;1;1;1	1;1;1;1;1;1	DNA polymerase;DNA polymerase delta catalytic subunit	POLD1	tr|M0QZB4|M0QZB4_HUMAN DNA polymerase delta catalytic subunit (Fragment) OS=Homo sapiens OX=9606 GN=POLD1 PE=1 SV=1;tr|A0A2R8Y705|A0A2R8Y705_HUMAN DNA polymerase (Fragment) OS=Homo sapiens OX=9606 GN=POLD1 PE=1 SV=1;tr|A0A2R8Y7K6|A0A2R8Y7K6_HUMAN DNA polym	TRUE	6	1	1	1	0	1	0	0	1	0	0	1	0	7.4	7.4	7.4	20.826	188	188;447;762;1009;1133;1107	0.0073733	1.8425		By MS/MS		NaN	NaN	NaN	1	0	Median	NaN	NaN	NaN	1	0	Median	NaN	NaN	NaN	1	0
E9PAK5;O75064	E9PAK5;O75064	3;3	3;3	3;3	DENN domain-containing protein 4B	DENND4B	tr|E9PAK5|E9PAK5_HUMAN DENN domain-containing protein 4B (Fragment) OS=Homo sapiens OX=9606 GN=DENND4B PE=1 SV=1;sp|O75064|DEN4B_HUMAN DENN domain-containing protein 4B OS=Homo sapiens OX=9606 GN=DENND4B PE=1 SV=4	TRUE	2	3	3	3	3	2	2	3	2	2	3	2	2	3.8	3.8	3.8	133.41	1218	1218;1496	0	9.5927	By MS/MS	By MS/MS	By MS/MS	0.55738	1.1327	18.613	7	5	Median	0.69235	1.1779	16.939	7	5	Median	1.3246	1.2051	22.818	7	5
Q10471	Q10471	5	5	5	Polypeptide N-acetylgalactosaminyltransferase 2;Polypeptide N-acetylgalactosaminyltransferase 2 soluble form	GALNT2	sp|Q10471|GALT2_HUMAN Polypeptide N-acetylgalactosaminyltransferase 2 OS=Homo sapiens OX=9606 GN=GALNT2 PE=1 SV=1	TRUE	1	5	5	5	3	3	3	3	3	3	3	3	3	11.4	11.4	11.4	64.732	571	571	0	13.528	By MS/MS	By MS/MS	By MS/MS	0.57527	1.2	27.985	8	7	Median	0.57418	1.174	17.202	8	7	Median	0.68965	1.0156	16.857	8	7
P08237;A0A2R8Y891;F8VZI0	P08237;A0A2R8Y891;F8VZI0	3;3;2	1;1;1	1;1;1	ATP-dependent 6-phosphofructokinase, muscle type	PFKM	sp|P08237|PFKAM_HUMAN ATP-dependent 6-phosphofructokinase, muscle type OS=Homo sapiens OX=9606 GN=PFKM PE=1 SV=2;tr|A0A2R8Y891|A0A2R8Y891_HUMAN ATP-dependent 6-phosphofructokinase OS=Homo sapiens OX=9606 GN=PFKM PE=1 SV=1;tr|F8VZI0|F8VZI0_HUMAN ATP-depende	TRUE	3	3	1	1	2	2	3	0	0	1	0	0	1	4.5	2.2	2.2	85.182	780	780;883;727	0	4.9131	By matching	By matching	By MS/MS	NaN	NaN	NaN	1	0	Median	NaN	NaN	NaN	1	0	Median	NaN	NaN	NaN	1	0
Q86UX7;F5H1C6;H0YFT5;F5H3I6	Q86UX7;F5H1C6	38;23;5;3	38;23;5;3	38;23;5;3	Fermitin family homolog 3	FERMT3	sp|Q86UX7|URP2_HUMAN Fermitin family homolog 3 OS=Homo sapiens OX=9606 GN=FERMT3 PE=1 SV=1;tr|F5H1C6|F5H1C6_HUMAN Fermitin family homolog 3 (Fragment) OS=Homo sapiens OX=9606 GN=FERMT3 PE=1 SV=1	TRUE	4	38	38	38	32	34	31	32	34	31	32	34	31	67	67	67	75.952	667	667;286;184;81	0	322.53	By MS/MS	By MS/MS	By MS/MS	0.67822	1.2109	16.99	120	16	Leave out requantified	0.72498	1.1457	11.911	120	16	Leave out requantified	1.042	1.0027	10.612	120	16
Q00796;H0YKB3;H0YLA4	Q00796;H0YKB3	3;2;1	3;2;1	3;2;1	Sorbitol dehydrogenase	SORD	sp|Q00796|DHSO_HUMAN Sorbitol dehydrogenase OS=Homo sapiens OX=9606 GN=SORD PE=1 SV=4;tr|H0YKB3|H0YKB3_HUMAN Sorbitol dehydrogenase OS=Homo sapiens OX=9606 GN=SORD PE=1 SV=1	TRUE	3	3	3	3	2	1	3	2	1	3	2	1	3	14.8	14.8	14.8	38.324	357	357;117;336	0	15.017	By MS/MS	By MS/MS	By MS/MS	0.41135	0.83876	8.5338	5	3	Median	0.48389	0.88239	5.5666	5	3	Median	1.2119	1.0159	17.762	5	3
P62495;B7Z7P8;D6RCB3;D6RJE8;I3L492	P62495;B7Z7P8	6;5;2;1;1	6;5;2;1;1	5;4;2;1;1	Eukaryotic peptide chain release factor subunit 1	ETF1	sp|P62495|ERF1_HUMAN Eukaryotic peptide chain release factor subunit 1 OS=Homo sapiens OX=9606 GN=ETF1 PE=1 SV=3;tr|B7Z7P8|B7Z7P8_HUMAN Eukaryotic peptide chain release factor subunit 1 OS=Homo sapiens OX=9606 GN=ETF1 PE=1 SV=1	TRUE	5	6	6	5	5	5	6	5	5	6	4	4	5	18.8	18.8	16.5	49.03	437	437;423;95;119;208	0	55.463	By MS/MS	By MS/MS	By MS/MS	0.49998	0.98463	10.928	16	3	Leave out requantified	0.58317	1.045	3.8785	16	3	Leave out requantified	1.1523	1.084	9.1792	16	3
A0A2R8YFQ8;A0A2R8YF99;A0A2R8YE40	A0A2R8YFQ8;A0A2R8YF99;A0A2R8YE40	1;1;1	1;1;1	1;1;1			tr|A0A2R8YFQ8|A0A2R8YFQ8_HUMAN Mitoguardin 1 OS=Homo sapiens OX=9606 GN=MIGA1 PE=1 SV=1;tr|A0A2R8YF99|A0A2R8YF99_HUMAN Mitoguardin 1 OS=Homo sapiens OX=9606 GN=MIGA1 PE=1 SV=1;tr|A0A2R8YE40|A0A2R8YE40_HUMAN Mitoguardin 1 OS=Homo sapiens OX=9606 GN=MIGA1 PE	TRUE	3	1	1	1	0	0	1	0	0	1	0	0	1	2.6	2.6	2.6	56.732	503	503;600;601	0.004714	2.0311			By MS/MS	NaN	NaN	NaN	0	0	Median	NaN	NaN	NaN	0	0	Median	NaN	NaN	NaN	0	0
Q9NZB2;A0A0C4DG79;A0A0C4DH52;Q5T035	Q9NZB2;A0A0C4DG79	6;3;2;1	6;3;2;1	6;3;2;1	Constitutive coactivator of PPAR-gamma-like protein 1	FAM120A	sp|Q9NZB2|F120A_HUMAN Constitutive coactivator of PPAR-gamma-like protein 1 OS=Homo sapiens OX=9606 GN=FAM120A PE=1 SV=2;tr|A0A0C4DG79|A0A0C4DG79_HUMAN Constitutive coactivator of PPAR-gamma-like protein 1 (Fragment) OS=Homo sapiens OX=9606 GN=FAM120A PE=1	TRUE	4	6	6	6	3	3	5	3	3	5	3	3	5	8.2	8.2	8.2	121.89	1118	1118;494;495;196	0	14.357	By MS/MS	By MS/MS	By MS/MS	0.60914	0.95168	13.539	10	1	Leave out requantified	0.78027	1.0612	56.602	10	1	Leave out requantified	1.2849	1.1572	50.141	10	1
V9GYH1;A0A2R8YF29;Q9BZ23	V9GYH1;A0A2R8YF29;Q9BZ23	1;1;1	1;1;1	1;1;1	Pantothenate kinase 2, mitochondrial	PANK2	tr|V9GYH1|V9GYH1_HUMAN Pantothenate kinase 2, mitochondrial (Fragment) OS=Homo sapiens OX=9606 GN=PANK2 PE=1 SV=1;tr|A0A2R8YF29|A0A2R8YF29_HUMAN Pantothenate kinase 2, mitochondrial (Fragment) OS=Homo sapiens OX=9606 GN=PANK2 PE=1 SV=1;sp|Q9BZ23|PANK2_HUMA	TRUE	3	1	1	1	1	0	0	1	0	0	1	0	0	6.1	6.1	6.1	12.787	115	115;403;570	1	-2	By MS/MS			NaN	NaN	NaN	1	1	Median	NaN	NaN	NaN	1	1	Median	NaN	NaN	NaN	1	1
P62330	P62330	3	3	3	ADP-ribosylation factor 6	ARF6	sp|P62330|ARF6_HUMAN ADP-ribosylation factor 6 OS=Homo sapiens OX=9606 GN=ARF6 PE=1 SV=2	TRUE	1	3	3	3	3	3	2	3	3	2	3	3	2	24.6	24.6	24.6	20.082	175	175	0	11.865	By MS/MS	By MS/MS	By MS/MS	1.0365	1.4338	36.144	9	4	Leave out requantified	0.67637	0.96423	17.034	9	4	Leave out requantified	1.115	0.94737	18.02	9	4
E7EUY6;E9PDQ5;B1ALK7;A0A2R8YG42;Q14155	E7EUY6;E9PDQ5;B1ALK7;A0A2R8YG42;Q14155	1;1;1;1;1	1;1;1;1;1	1;1;1;1;1	Rho guanine nucleotide exchange factor 7	ARHGEF7	tr|E7EUY6|E7EUY6_HUMAN Rho guanine nucleotide exchange factor 7 (Fragment) OS=Homo sapiens OX=9606 GN=ARHGEF7 PE=1 SV=1;tr|E9PDQ5|E9PDQ5_HUMAN Rho guanine nucleotide exchange factor 7 OS=Homo sapiens OX=9606 GN=ARHGEF7 PE=1 SV=1;tr|B1ALK7|B1ALK7_HUMAN Rho	TRUE	5	1	1	1	1	0	1	1	0	1	1	0	1	4.5	4.5	4.5	50.493	447	447;547;705;862;803	0.0013468	2.6975	By MS/MS		By MS/MS	NaN	NaN	NaN	1	0	Median	NaN	NaN	NaN	1	0	Median	NaN	NaN	NaN	1	0
A0A2R8YGB3;Q9UNA1;H0Y835;A0A2R8Y5C0;H0Y4P9	A0A2R8YGB3;Q9UNA1;H0Y835;A0A2R8Y5C0;H0Y4P9	2;2;1;1;1	2;2;1;1;1	2;2;1;1;1	Rho GTPase-activating protein 26	ARHGAP26	tr|A0A2R8YGB3|A0A2R8YGB3_HUMAN Rho GTPase-activating protein 26 OS=Homo sapiens OX=9606 GN=ARHGAP26 PE=1 SV=1;sp|Q9UNA1|RHG26_HUMAN Rho GTPase-activating protein 26 OS=Homo sapiens OX=9606 GN=ARHGAP26 PE=1 SV=1;tr|H0Y835|H0Y835_HUMAN Rho GTPase-activating	TRUE	5	2	2	2	1	1	0	1	1	0	1	1	0	3.2	3.2	3.2	78.414	686	686;814;294;338;388	0.000356	3.35	By MS/MS	By MS/MS		NaN	NaN	NaN	0	0	Median	NaN	NaN	NaN	0	0	Median	NaN	NaN	NaN	0	0
A0A2U3TZH3;Q05639	A0A2U3TZH3;Q05639	14;14	1;1	1;1	Elongation factor 1-alpha 2	EEF1A2	tr|A0A2U3TZH3|A0A2U3TZH3_HUMAN Elongation factor 1-alpha OS=Homo sapiens OX=9606 GN=EEF1A2 PE=1 SV=1;sp|Q05639|EF1A2_HUMAN Elongation factor 1-alpha 2 OS=Homo sapiens OX=9606 GN=EEF1A2 PE=1 SV=1	TRUE	2	14	1	1	12	13	11	0	1	0	0	1	0	24.6	4.8	4.8	54.34	496	496;463	0.0041707	2.198	By matching	By MS/MS	By matching	NaN	NaN	NaN	1	1	Median	NaN	NaN	NaN	0	0	Median	NaN	NaN	NaN	0	0
H0YME6;A0A2U3TZL8;H7BYN4;Q02241;H0YMJ4;A0A2R8Y531	H0YME6;A0A2U3TZL8;H7BYN4;Q02241;H0YMJ4;A0A2R8Y531	2;2;2;2;1;1	2;2;2;2;1;1	2;2;2;2;1;1	Kinesin-like protein;Kinesin-like protein KIF23	KIF23	tr|H0YME6|H0YME6_HUMAN Kinesin-like protein KIF23 OS=Homo sapiens OX=9606 GN=KIF23 PE=1 SV=1;tr|A0A2U3TZL8|A0A2U3TZL8_HUMAN Kinesin-like protein OS=Homo sapiens OX=9606 GN=KIF23 PE=1 SV=1;tr|H7BYN4|H7BYN4_HUMAN Kinesin-like protein OS=Homo sapiens OX=9606	TRUE	6	2	2	2	2	0	0	2	0	0	2	0	0	7	7	7	42.433	371	371;810;952;960;109;283	0.0071429	1.9123	By MS/MS			0.41401	0.6073	29.314	2	1	Median	NaN	NaN	NaN	1	0	Median	NaN	NaN	NaN	1	0
A0A384DVU0;Q8IY17	A0A384DVU0;Q8IY17	2;2	2;2	2;2	Neuropathy target esterase	PNPLA6	tr|A0A384DVU0|A0A384DVU0_HUMAN Neuropathy target esterase OS=Homo sapiens OX=9606 GN=PNPLA6 PE=1 SV=1;sp|Q8IY17|PLPL6_HUMAN Neuropathy target esterase OS=Homo sapiens OX=9606 GN=PNPLA6 PE=1 SV=3	TRUE	2	2	2	2	2	2	1	2	2	1	2	2	1	2.5	2.5	2.5	149.92	1365	1365;1375	0	10.956	By MS/MS	By MS/MS	By MS/MS	0.57588	0.86805	13.56	4	3	Median	0.40572	0.62704	16.31	4	3	Median	0.72562	0.74268	10.389	4	3
A0A3B3IRK5;Q9H2D1	A0A3B3IRK5;Q9H2D1	1;1	1;1	1;1	Mitochondrial folate transporter/carrier	SLC25A32	tr|A0A3B3IRK5|A0A3B3IRK5_HUMAN Uncharacterized protein OS=Homo sapiens OX=9606 PE=3 SV=1;sp|Q9H2D1|MFTC_HUMAN Mitochondrial folate transporter/carrier OS=Homo sapiens OX=9606 GN=SLC25A32 PE=1 SV=2	TRUE	2	1	1	1	1	1	0	1	1	0	1	1	0	5.3	5.3	5.3	30.057	264	264;315	0.0044164	2.0605	By MS/MS	By MS/MS		NaN	NaN	NaN	1	1	Median	NaN	NaN	NaN	0	0	Median	NaN	NaN	NaN	0	0
A0A3B3IRK8;Q9BYX4	A0A3B3IRK8;Q9BYX4	1;1	1;1	1;1	Interferon-induced helicase C domain-containing protein 1	IFIH1	tr|A0A3B3IRK8|A0A3B3IRK8_HUMAN Interferon-induced helicase C domain-containing protein 1 OS=Homo sapiens OX=9606 GN=IFIH1 PE=1 SV=1;sp|Q9BYX4|IFIH1_HUMAN Interferon-induced helicase C domain-containing protein 1 OS=Homo sapiens OX=9606 GN=IFIH1 PE=1 SV=3	TRUE	2	1	1	1	1	0	1	1	0	1	1	0	1	2	2	2	112.28	986	986;1025	0	5.2962	By MS/MS		By MS/MS	1.4138	2.1633	27.417	3	2	Median	1.3325	1.701	21.614	3	2	Median	0.79804	0.69182	21.799	3	2
A0A3B3IRL2;O75629	A0A3B3IRL2;O75629	1;1	1;1	1;1	Protein CREG1	CREG1	tr|A0A3B3IRL2|A0A3B3IRL2_HUMAN Cellular repressor of E1A-stimulated genes 1, isoform CRA_a OS=Homo sapiens OX=9606 GN=CREG1 PE=1 SV=1;sp|O75629|CREG1_HUMAN Protein CREG1 OS=Homo sapiens OX=9606 GN=CREG1 PE=1 SV=1	TRUE	2	1	1	1	1	1	1	1	1	1	1	1	1	8.2	8.2	8.2	28.058	255	255;220	0	4.2455	By MS/MS	By MS/MS	By MS/MS	0.30573	0.58731	28.905	3	3	Plateau	0.54105	1.0366	11.806	3	3	Median	1.191	1.1914	31.138	3	3
A0A3B3IRL5;C9J381;P20839	A0A3B3IRL5;C9J381;P20839	3;3;3	2;2;2	2;2;2	Inosine-5-monophosphate dehydrogenase;Inosine-5-monophosphate dehydrogenase 1	IMPDH1	tr|A0A3B3IRL5|A0A3B3IRL5_HUMAN Inosine-5-monophosphate dehydrogenase (Fragment) OS=Homo sapiens OX=9606 GN=IMPDH1 PE=1 SV=1;tr|C9J381|C9J381_HUMAN Inosine-5-monophosphate dehydrogenase OS=Homo sapiens OX=9606 GN=IMPDH1 PE=1 SV=1;sp|P20839|IMDH1_HUMAN Ino	TRUE	3	3	2	2	2	1	1	1	0	1	1	0	1	6.1	4.5	4.5	54.272	509	509;513;514	0.0019835	2.5342	By MS/MS	By matching	By MS/MS	NaN	NaN	NaN	1	0	Median	NaN	NaN	NaN	1	0	Median	NaN	NaN	NaN	1	0
O00186	O00186	5	5	5	Syntaxin-binding protein 3	STXBP3	sp|O00186|STXB3_HUMAN Syntaxin-binding protein 3 OS=Homo sapiens OX=9606 GN=STXBP3 PE=1 SV=2	TRUE	1	5	5	5	3	4	3	3	4	3	3	4	3	7.6	7.6	7.6	67.764	592	592	0	8.0399	By MS/MS	By MS/MS	By MS/MS	0.43599	0.75281	31.348	7	3	Leave out requantified	0.60383	0.94421	19.802	7	3	Leave out requantified	1.2172	1.1641	4.1459	7	3
A0A3B3IRQ9;H0YCK3;A0A3B3ISX1;A0A3B3ITG9;A0A3B3ISU1	A0A3B3IRQ9;H0YCK3;A0A3B3ISX1	19;19;10;8;2	1;1;0;0;0	1;1;0;0;0		ADAR	tr|A0A3B3IRQ9|A0A3B3IRQ9_HUMAN Double-stranded RNA-specific adenosine deaminase (Fragment) OS=Homo sapiens OX=9606 GN=ADAR PE=1 SV=1;tr|H0YCK3|H0YCK3_HUMAN Double-stranded RNA-specific adenosine deaminase (Fragment) OS=Homo sapiens OX=9606 GN=ADAR PE=1 SV=	TRUE	5	19	1	1	13	15	14	0	1	0	0	1	0	20.8	2	2	128.27	1158	1158;1195;707;350;164	0.00035881	3.44	By matching	By MS/MS	By matching	NaN	NaN	NaN	1	1	Median	NaN	NaN	NaN	1	1	Median	NaN	NaN	NaN	1	1
Q9C0H2	Q9C0H2	2	2	2	Protein tweety homolog 3	TTYH3	sp|Q9C0H2|TTYH3_HUMAN Protein tweety homolog 3 OS=Homo sapiens OX=9606 GN=TTYH3 PE=1 SV=3	TRUE	1	2	2	2	2	1	2	2	1	2	2	1	2	5.5	5.5	5.5	57.544	523	523	0	13.424	By MS/MS	By MS/MS	By MS/MS	0.44269	0.84201	4.0683	7	3	Leave out requantified	0.64764	1.0899	18.956	7	3	Leave out requantified	1.2509	1.3271	32.392	7	3
A0A3B3IRR6;A0A3B3IT54;A0A3B3ITA3;Q9H7E9	A0A3B3IRR6;A0A3B3IT54;A0A3B3ITA3;Q9H7E9	1;1;1;1	1;1;1;1	1;1;1;1	UPF0488 protein C8orf33	C8orf33	tr|A0A3B3IRR6|A0A3B3IRR6_HUMAN UPF0488 protein C8orf33 OS=Homo sapiens OX=9606 GN=C8orf33 PE=1 SV=1;tr|A0A3B3IT54|A0A3B3IT54_HUMAN UPF0488 protein C8orf33 OS=Homo sapiens OX=9606 GN=C8orf33 PE=1 SV=1;tr|A0A3B3ITA3|A0A3B3ITA3_HUMAN UPF0488 protein C8orf33 O	TRUE	4	1	1	1	1	1	1	1	1	1	1	1	1	7.1	7.1	7.1	24.465	226	226;236;248;229	0	6.585	By MS/MS	By MS/MS	By matching	0.47814	0.94983	4.7187	3	1	Plateau	0.48851	0.94086	12.235	3	1	Plateau	1.0139	0.93309	2.9131	3	1
C9J3L8;C9J5W0;A0A3B3IRT8;E9PAL7;C9IZQ1;P43307	C9J3L8;C9J5W0;A0A3B3IRT8;E9PAL7;C9IZQ1;P43307	2;2;2;2;2;2	2;2;2;2;2;2	2;2;2;2;2;2	Translocon-associated protein subunit alpha	SSR1	tr|C9J3L8|C9J3L8_HUMAN Translocon-associated protein subunit alpha OS=Homo sapiens OX=9606 GN=SSR1 PE=1 SV=1;tr|C9J5W0|C9J5W0_HUMAN Translocon-associated protein subunit alpha OS=Homo sapiens OX=9606 GN=SSR1 PE=1 SV=1;tr|A0A3B3IRT8|A0A3B3IRT8_HUMAN Translo	TRUE	6	2	2	2	2	1	1	2	1	1	2	1	1	8.7	8.7	8.7	29.573	265	265;266;288;291;298;286	0.00035778	3.4145	By MS/MS	By MS/MS	By MS/MS	0.55219	0.80018	24.299	4	1	Linear	0.77881	1.0917	12.57	4	1	Linear	1.5223	1.4088	14.906	4	1
A0A3B3IS06;J3KQ96;E7ETY2;Q13428	A0A3B3IS06;J3KQ96;E7ETY2;Q13428	1;1;1;1	1;1;1;1	1;1;1;1	Treacle protein	TCOF1	tr|A0A3B3IS06|A0A3B3IS06_HUMAN Treacle protein (Fragment) OS=Homo sapiens OX=9606 GN=TCOF1 PE=1 SV=1;tr|J3KQ96|J3KQ96_HUMAN Treacle protein (Fragment) OS=Homo sapiens OX=9606 GN=TCOF1 PE=1 SV=1;tr|E7ETY2|E7ETY2_HUMAN Treacle protein OS=Homo sapiens OX=9606	TRUE	4	1	1	1	1	1	0	1	1	0	1	1	0	0.7	0.7	0.7	138.69	1358	1358;1414;1488;1488	0.0079535	1.814	By MS/MS	By MS/MS		0.50216	0.98979	7.202	2	2	Median	0.40621	0.78932	5.398	2	2	Median	0.80893	0.81716	7.2117	2	2
E9PKB5;B8ZZF0;C9JIR6;A0A3B3IS24;P35813;O75688	E9PKB5;B8ZZF0;C9JIR6;A0A3B3IS24;P35813;O75688	1;1;1;1;1;1	1;1;1;1;1;1	1;1;1;1;1;1	Protein phosphatase 1A;Protein phosphatase 1B	PPM1A;PPM1B	tr|E9PKB5|E9PKB5_HUMAN Protein phosphatase 1A (Fragment) OS=Homo sapiens OX=9606 GN=PPM1A PE=1 SV=1;tr|B8ZZF0|B8ZZF0_HUMAN Protein phosphatase 1B (Fragment) OS=Homo sapiens OX=9606 GN=PPM1B PE=1 SV=2;tr|C9JIR6|C9JIR6_HUMAN Protein phosphatase 1B (Fragment)	TRUE	6	1	1	1	1	1	1	1	1	1	1	1	1	6.4	6.4	6.4	20.644	187	187;303;378;384;382;479	0.0019822	2.5206	By MS/MS	By MS/MS	By MS/MS	0.43015	0.87622	15.115	5	4	Median	0.37807	0.75123	13.656	5	4	Median	0.86233	0.84013	8.4077	5	4
A0A3B3IS71;P06400	A0A3B3IS71;P06400	1;1	1;1	1;1	Retinoblastoma-associated protein	RB1	tr|A0A3B3IS71|A0A3B3IS71_HUMAN Retinoblastoma-associated protein OS=Homo sapiens OX=9606 GN=RB1 PE=1 SV=1;sp|P06400|RB_HUMAN Retinoblastoma-associated protein OS=Homo sapiens OX=9606 GN=RB1 PE=1 SV=2	TRUE	2	1	1	1	1	1	0	1	1	0	1	1	0	2.4	2.4	2.4	105.45	923	923;928	0	10.162	By MS/MS	By MS/MS		0.48739	0.73496	11.859	2	0	Median	0.33814	0.46603	24.468	2	0	Median	0.77615	0.67818	17.73	2	0
A0A3B3ISG5;P14735	A0A3B3ISG5;P14735	1;1	1;1	1;1	Insulin-degrading enzyme	IDE	tr|A0A3B3ISG5|A0A3B3ISG5_HUMAN Insulin-degrading enzyme OS=Homo sapiens OX=9606 GN=IDE PE=1 SV=1;sp|P14735|IDE_HUMAN Insulin-degrading enzyme OS=Homo sapiens OX=9606 GN=IDE PE=1 SV=4	TRUE	2	1	1	1	1	0	1	1	0	1	1	0	1	1.5	1.5	1.5	117.94	1019	1019;1019	0	3.9332	By MS/MS		By MS/MS	0.62492	0.92534	4.8023	2	1	Median	0.82322	1.0689	1.308	2	1	Median	1.4092	1.2453	10.337	2	1
A0A3B3ISH6;Q86U38	A0A3B3ISH6;Q86U38	2;2	2;2	2;2	Nucleolar protein 9	NOP9	tr|A0A3B3ISH6|A0A3B3ISH6_HUMAN Nucleolar protein 9 (Fragment) OS=Homo sapiens OX=9606 GN=NOP9 PE=1 SV=1;sp|Q86U38|NOP9_HUMAN Nucleolar protein 9 OS=Homo sapiens OX=9606 GN=NOP9 PE=1 SV=1	TRUE	2	2	2	2	0	2	1	0	2	1	0	2	1	10.7	10.7	10.7	49.714	456	456;636	0	8.2793		By MS/MS	By MS/MS	NaN	NaN	NaN	1	0	Median	NaN	NaN	NaN	1	0	Median	NaN	NaN	NaN	1	0
F5H5A1;A0A3B3ISK9;Q4G176	F5H5A1;A0A3B3ISK9;Q4G176	1;1;1	1;1;1	1;1;1	Acyl-CoA synthetase family member 3, mitochondrial	ACSF3	tr|F5H5A1|F5H5A1_HUMAN Acyl-CoA synthetase family member 3, mitochondrial OS=Homo sapiens OX=9606 GN=ACSF3 PE=1 SV=1;tr|A0A3B3ISK9|A0A3B3ISK9_HUMAN Acyl-CoA synthetase family member 3, mitochondrial OS=Homo sapiens OX=9606 GN=ACSF3 PE=1 SV=1;sp|Q4G176|ACSF	TRUE	3	1	1	1	1	1	1	1	1	1	1	1	1	6.4	6.4	6.4	35.142	311	311;646;576	0	6.2875	By MS/MS	By MS/MS	By MS/MS	0.53585	0.93124	12.17	3	0	Median	0.54158	1.1662	33.548	3	0	Median	0.90768	0.96092	26.222	3	0
P52888;K7EP46;K7EIK4;K7EKB6;K7EMU4;K7EL32;K7EL02	P52888;K7EP46	5;4;1;1;1;1;1	5;4;1;1;1;1;1	5;4;1;1;1;1;1	Thimet oligopeptidase	THOP1	sp|P52888|THOP1_HUMAN Thimet oligopeptidase OS=Homo sapiens OX=9606 GN=THOP1 PE=1 SV=2;tr|K7EP46|K7EP46_HUMAN Thimet oligopeptidase OS=Homo sapiens OX=9606 GN=THOP1 PE=1 SV=1	TRUE	7	5	5	5	3	4	3	3	4	3	3	4	3	8.6	8.6	8.6	78.839	689	689;568;169;176;204;216;260	0	13.06	By MS/MS	By MS/MS	By MS/MS	0.61937	1.2506	24.311	9	2	Leave out requantified	0.6812	0.96974	13.465	9	2	Leave out requantified	1.2395	1.1685	22.4	9	2
A0A3B3ISV4;Q8N0U8	A0A3B3ISV4;Q8N0U8	1;1	1;1	1;1	Vitamin K epoxide reductase complex subunit 1-like protein 1	VKORC1L1	tr|A0A3B3ISV4|A0A3B3ISV4_HUMAN Vitamin K epoxide reductase complex subunit 1-like protein 1 OS=Homo sapiens OX=9606 GN=VKORC1L1 PE=1 SV=1;sp|Q8N0U8|VKORL_HUMAN Vitamin K epoxide reductase complex subunit 1-like protein 1 OS=Homo sapiens OX=9606 GN=VKORC1L1	TRUE	2	1	1	1	1	1	1	1	1	1	1	1	1	4.9	4.9	4.9	23.499	223	223;176	0	3.6809	By MS/MS	By MS/MS	By MS/MS	0.73476	1.0358	22.811	3	0	Plateau	0.76394	0.99232	6.0767	3	0	Plateau	0.99278	0.9413	4.7049	3	0
Q9H6R4;A0A0C4DFX0;A0A0A0MRW6	Q9H6R4;A0A0C4DFX0;A0A0A0MRW6	2;1;1	2;1;1	2;1;1	Nucleolar protein 6	NOL6	sp|Q9H6R4|NOL6_HUMAN Nucleolar protein 6 OS=Homo sapiens OX=9606 GN=NOL6 PE=1 SV=2;tr|A0A0C4DFX0|A0A0C4DFX0_HUMAN Nucleolar protein 6 OS=Homo sapiens OX=9606 GN=NOL6 PE=1 SV=1;tr|A0A0A0MRW6|A0A0A0MRW6_HUMAN Nucleolar protein 6 OS=Homo sapiens OX=9606 GN=NO	TRUE	3	2	2	2	2	1	1	2	1	1	2	1	1	3.3	3.3	3.3	127.59	1146	1146;200;1008	0	7.1353	By MS/MS	By MS/MS	By MS/MS	0.52903	0.82023	40.427	7	6	Median	0.82258	1.1216	32.794	7	6	Median	1.5645	1.4964	64.167	7	6
A0A3B3ITX7;E9PG39;A0A3B3ISZ0;E9PC15;A0A3B3ITD0;Q53H12;A0A3B3IUC9;A0A3B3ITV0;A0A3B3IS09;A0A3B3ISY9	A0A3B3ITX7;E9PG39;A0A3B3ISZ0;E9PC15;A0A3B3ITD0;Q53H12;A0A3B3IUC9;A0A3B3ITV0;A0A3B3IS09;A0A3B3ISY9	2;2;2;2;2;2;1;1;1;1	2;2;2;2;2;2;1;1;1;1	2;2;2;2;2;2;1;1;1;1	Acylglycerol kinase, mitochondrial	AGK	tr|A0A3B3ITX7|A0A3B3ITX7_HUMAN Acylglycerol kinase, mitochondrial OS=Homo sapiens OX=9606 GN=AGK PE=1 SV=1;tr|E9PG39|E9PG39_HUMAN Acylglycerol kinase, mitochondrial OS=Homo sapiens OX=9606 GN=AGK PE=1 SV=1;tr|A0A3B3ISZ0|A0A3B3ISZ0_HUMAN Acylglycerol kinase	TRUE	10	2	2	2	2	1	1	2	1	1	2	1	1	19.6	19.6	19.6	23.423	214	214;244;350;394;418;422;134;138;146;330	0	51.804	By MS/MS	By MS/MS	By MS/MS	0.80623	1.2023	1.292	4	0	Leave out requantified	0.73384	0.98854	8.8137	4	0	Leave out requantified	0.96648	0.90226	2.4417	4	0
G3V3J8;A0A3B3IT68;F5H2B5;Q96BZ4	G3V3J8;A0A3B3IT68;F5H2B5;Q96BZ4	2;2;2;2	2;2;2;2	2;2;2;2	Phospholipase D4	PLD4	tr|G3V3J8|G3V3J8_HUMAN Phospholipase D4 (Fragment) OS=Homo sapiens OX=9606 GN=PLD4 PE=1 SV=1;tr|A0A3B3IT68|A0A3B3IT68_HUMAN Phospholipase D4 OS=Homo sapiens OX=9606 GN=PLD4 PE=1 SV=1;tr|F5H2B5|F5H2B5_HUMAN Phospholipase D4 OS=Homo sapiens OX=9606 GN=PLD4 P	TRUE	4	2	2	2	0	2	1	0	2	1	0	2	1	11.3	11.3	11.3	28.202	257	257;455;513;506	0.0044122	2.0546		By MS/MS	By MS/MS	0.36745	0.78153	13.43	2	2	Median	NaN	NaN	NaN	1	1	Median	NaN	NaN	NaN	1	1
Q7Z2K6;E7ER77;A0A0C4DGF0	Q7Z2K6;E7ER77	15;15;4	15;15;4	15;15;4	Endoplasmic reticulum metallopeptidase 1	ERMP1	sp|Q7Z2K6|ERMP1_HUMAN Endoplasmic reticulum metallopeptidase 1 OS=Homo sapiens OX=9606 GN=ERMP1 PE=1 SV=2;tr|E7ER77|E7ER77_HUMAN Endoplasmic reticulum metallopeptidase 1 OS=Homo sapiens OX=9606 GN=ERMP1 PE=1 SV=1	TRUE	3	15	15	15	10	11	9	10	11	9	10	11	9	18.6	18.6	18.6	100.23	904	904;841;351	0	50.387	By MS/MS	By MS/MS	By MS/MS	0.71612	1.1835	9.8737	31	14	Leave out requantified	0.67197	1.0679	11.998	31	14	Leave out requantified	0.93271	0.91448	7.3533	31	14
A6NKZ2;P51606;H7C2G7;H7C1A7;H7C317	A6NKZ2;P51606	5;5;2;2;1	5;5;2;2;1	5;5;2;2;1	N-acylglucosamine 2-epimerase	RENBP	tr|A6NKZ2|A6NKZ2_HUMAN N-acylglucosamine 2-epimerase OS=Homo sapiens OX=9606 GN=RENBP PE=1 SV=2;sp|P51606|RENBP_HUMAN N-acylglucosamine 2-epimerase OS=Homo sapiens OX=9606 GN=RENBP PE=1 SV=2	TRUE	5	5	5	5	5	3	3	5	3	3	5	3	3	14	14	14	47.065	413	413;427;116;159;125	0	12.778	By MS/MS	By MS/MS	By MS/MS	0.46736	0.78705	17.161	14	11	Median	0.83377	1.1834	16.573	14	11	Median	1.776	1.7023	19.908	14	11
P52907	P52907	13	13	11	F-actin-capping protein subunit alpha-1	CAPZA1	sp|P52907|CAZA1_HUMAN F-actin-capping protein subunit alpha-1 OS=Homo sapiens OX=9606 GN=CAPZA1 PE=1 SV=3	TRUE	1	13	13	11	12	12	10	12	12	10	10	10	9	59.8	59.8	50.3	32.922	286	286	0	271.05	By MS/MS	By MS/MS	By MS/MS	0.67364	1.0184	18.399	42	8	Leave out requantified	0.67785	0.91983	13.03	42	8	Leave out requantified	0.91595	0.87463	13.153	42	8
P31689	P31689	4	4	4	DnaJ homolog subfamily A member 1	DNAJA1	sp|P31689|DNJA1_HUMAN DnaJ homolog subfamily A member 1 OS=Homo sapiens OX=9606 GN=DNAJA1 PE=1 SV=2	TRUE	1	4	4	4	3	3	3	3	3	3	3	3	3	17.9	17.9	17.9	44.868	397	397	0	29.033	By MS/MS	By MS/MS	By MS/MS	0.77319	1.1352	4.0314	12	8	Leave out requantified	0.75321	0.97213	2.0227	12	8	Leave out requantified	1.0068	0.88335	10.955	12	8
A0A3B3ITW1;P49841	A0A3B3ITW1;P49841	2;2	2;2	2;2	Glycogen synthase kinase-3 beta	GSK3B	tr|A0A3B3ITW1|A0A3B3ITW1_HUMAN Glycogen synthase kinase-3 beta OS=Homo sapiens OX=9606 GN=GSK3B PE=1 SV=1;sp|P49841|GSK3B_HUMAN Glycogen synthase kinase-3 beta OS=Homo sapiens OX=9606 GN=GSK3B PE=1 SV=2	TRUE	2	2	2	2	1	1	0	1	1	0	1	1	0	11.3	11.3	11.3	52.454	470	470;420	0	4.0846	By MS/MS	By MS/MS		0.6114	1.0718	11.195	2	1	Median	0.65954	1.1042	26.185	2	1	Median	1.055	1.0026	41.505	2	1
P08648;H0YIV7	P08648	9;2	9;2	9;2	Integrin alpha-5;Integrin alpha-5 heavy chain;Integrin alpha-5 light chain	ITGA5	sp|P08648|ITA5_HUMAN Integrin alpha-5 OS=Homo sapiens OX=9606 GN=ITGA5 PE=1 SV=2	TRUE	2	9	9	9	9	7	6	9	7	6	9	7	6	13.4	13.4	13.4	114.54	1049	1049;119	0	98.574	By MS/MS	By MS/MS	By MS/MS	0.59626	1.1818	19.115	22	9	Leave out requantified	0.57258	1.0217	15.398	22	9	Leave out requantified	0.94828	0.88064	9.536	22	9
P16152;E9PQ63;A8MTM1	P16152	9;4;4	9;4;4	7;2;2	Carbonyl reductase [NADPH] 1	CBR1	sp|P16152|CBR1_HUMAN Carbonyl reductase [NADPH] 1 OS=Homo sapiens OX=9606 GN=CBR1 PE=1 SV=3	TRUE	3	9	9	7	8	8	7	8	8	7	6	6	5	46.9	46.9	36.5	30.375	277	277;178;222	0	87.189	By MS/MS	By MS/MS	By MS/MS	0.52095	0.93224	23.127	24	7	Leave out requantified	0.78875	1.4789	15.26	24	7	Leave out requantified	1.5973	1.5563	11.559	24	7
B1AHD1;A0A3B3IUA2;P55769;A0A3B3IRU2	B1AHD1;A0A3B3IUA2;P55769;A0A3B3IRU2	2;2;2;1	2;2;2;1	2;2;2;1	NHP2-like protein 1;NHP2-like protein 1, N-terminally processed	NHP2L1	tr|B1AHD1|B1AHD1_HUMAN NHP2-like protein 1 OS=Homo sapiens OX=9606 GN=SNU13 PE=1 SV=1;tr|A0A3B3IUA2|A0A3B3IUA2_HUMAN NHP2-like protein 1 OS=Homo sapiens OX=9606 GN=SNU13 PE=1 SV=1;sp|P55769|NH2L1_HUMAN NHP2-like protein 1 OS=Homo sapiens OX=9606 GN=SNU13 P	TRUE	4	2	2	2	2	1	1	2	1	1	2	1	1	18.2	18.2	18.2	14.627	132	132;272;128;73	0	10.466	By MS/MS	By MS/MS	By MS/MS	0.48121	0.95725	6.1982	3	0	Plateau	0.46702	0.89827	5.7269	3	0	Plateau	1.0832	1.0452	2.7578	3	0
P52566;F5H3P3;F5H6Q0;H0YGX7;F5H2R5	P52566;F5H3P3;F5H6Q0;H0YGX7;F5H2R5	15;13;12;11;9	15;13;12;11;9	15;13;12;11;9	Rho GDP-dissociation inhibitor 2	ARHGDIB	sp|P52566|GDIR2_HUMAN Rho GDP-dissociation inhibitor 2 OS=Homo sapiens OX=9606 GN=ARHGDIB PE=1 SV=3;tr|F5H3P3|F5H3P3_HUMAN Rho GDP-dissociation inhibitor 2 (Fragment) OS=Homo sapiens OX=9606 GN=ARHGDIB PE=1 SV=8;tr|F5H6Q0|F5H6Q0_HUMAN Rho GDP-dissociation	TRUE	5	15	15	15	13	11	12	13	11	12	13	11	12	71.6	71.6	71.6	22.988	201	201;158;112;195;88	0	164.49	By MS/MS	By MS/MS	By MS/MS	0.63841	1.0053	15.457	52	9	Leave out requantified	0.54479	0.76212	15.261	51	8	Leave out requantified	0.84523	0.75344	16.977	51	8
P18077;F8WBS5;F8WB72;C9K025	P18077;F8WBS5;F8WB72;C9K025	7;5;5;5	7;5;5;5	7;5;5;5	60S ribosomal protein L35a	RPL35A	sp|P18077|RL35A_HUMAN 60S ribosomal protein L35a OS=Homo sapiens OX=9606 GN=RPL35A PE=1 SV=2;tr|F8WBS5|F8WBS5_HUMAN 60S ribosomal protein L35a OS=Homo sapiens OX=9606 GN=RPL35A PE=1 SV=1;tr|F8WB72|F8WB72_HUMAN 60S ribosomal protein L35a OS=Homo sapiens OX=	TRUE	4	7	7	7	5	5	3	5	5	3	5	5	3	31.8	31.8	31.8	12.538	110	110;55;57;94	0	9.2191	By MS/MS	By MS/MS	By MS/MS	0.48404	0.86201	30.009	15	5	Leave out requantified	0.74215	1.0212	29.079	15	5	Leave out requantified	1.3766	1.2489	14.339	15	5
A0A3B3IUB9;Q9NR09	A0A3B3IUB9;Q9NR09	1;1	1;1	1;1	Baculoviral IAP repeat-containing protein 6	BIRC6	tr|A0A3B3IUB9|A0A3B3IUB9_HUMAN Baculoviral IAP repeat-containing protein 6 (Fragment) OS=Homo sapiens OX=9606 GN=BIRC6 PE=1 SV=1;sp|Q9NR09|BIRC6_HUMAN Baculoviral IAP repeat-containing protein 6 OS=Homo sapiens OX=9606 GN=BIRC6 PE=1 SV=2	TRUE	2	1	1	1	1	0	0	1	0	0	1	0	0	0.3	0.3	0.3	419.02	3842	3842;4857	0.0047229	2.0487	By MS/MS			NaN	NaN	NaN	1	1	Median	NaN	NaN	NaN	1	1	Median	NaN	NaN	NaN	1	1
Q5VZZ6;A0A0J9YX66;A0A1B0GU44;E9PC62;A0A1B0GUN8;A0A0J9YXJ0;O95319;V9GYD9;V9GY47;A0A0J9YXK1;G5EA30;Q92879	Q5VZZ6;A0A0J9YX66;A0A1B0GU44;E9PC62;A0A1B0GUN8;A0A0J9YXJ0;O95319;V9GYD9	10;10;10;10;10;10;10;9;4;4;1;1	10;10;10;10;10;10;10;9;4;4;1;1	10;10;10;10;10;10;10;9;4;4;1;1	CUGBP Elav-like family member 2	CELF2	tr|Q5VZZ6|Q5VZZ6_HUMAN CUGBP Elav-like family member 2 OS=Homo sapiens OX=9606 GN=CELF2 PE=1 SV=2;tr|A0A0J9YX66|A0A0J9YX66_HUMAN CUGBP Elav-like family member 2 OS=Homo sapiens OX=9606 GN=CELF2 PE=1 SV=1;tr|A0A1B0GU44|A0A1B0GU44_HUMAN CUGBP Elav-like famil	TRUE	12	10	10	10	7	5	4	7	5	4	7	5	4	22.5	22.5	22.5	53.657	502	502;514;520;521;526;533;508;440;70;94;514;486	0	35.849	By MS/MS	By MS/MS	By MS/MS	0.68653	1.1545	42.616	20	8	Leave out requantified	0.72997	1.0328	37.681	20	8	Leave out requantified	1.0385	0.9288	31.406	20	8
P63092;Q5JWF2;A0A0A0MR13;S4R3E3	P63092;Q5JWF2;A0A0A0MR13	6;6;3;1	5;5;3;1	5;5;3;1	Guanine nucleotide-binding protein G(s) subunit alpha isoforms short;Guanine nucleotide-binding protein G(s) subunit alpha isoforms XLas	GNAS	sp|P63092|GNAS2_HUMAN Guanine nucleotide-binding protein G(s) subunit alpha isoforms short OS=Homo sapiens OX=9606 GN=GNAS PE=1 SV=1;sp|Q5JWF2|GNAS1_HUMAN Guanine nucleotide-binding protein G(s) subunit alpha isoforms XLas OS=Homo sapiens OX=9606 GN=GNAS P	TRUE	4	6	5	5	4	3	4	3	2	3	3	2	3	16.5	13.7	13.7	45.664	394	394;1037;158;160	0	10.426	By MS/MS	By MS/MS	By MS/MS	0.504	0.93443	20.392	7	3	Leave out requantified	0.64996	0.95295	7.4907	7	3	Leave out requantified	1.2814	1.1928	16.881	7	3
B7Z8Z7;A0AV96	B7Z8Z7;A0AV96	1;1	1;1	1;1	RNA-binding protein 47	RBM47	tr|B7Z8Z7|B7Z8Z7_HUMAN RNA-binding protein 47 OS=Homo sapiens OX=9606 GN=RBM47 PE=1 SV=1;sp|A0AV96|RBM47_HUMAN RNA-binding protein 47 OS=Homo sapiens OX=9606 GN=RBM47 PE=1 SV=2	TRUE	2	1	1	1	1	1	1	1	1	1	1	1	1	4.9	4.9	4.9	60.567	555	555;593	0	13.922	By MS/MS	By MS/MS	By MS/MS	0.72766	1.1611	5.5501	3	0	Plateau	0.99989	1.3824	7.0035	3	0	Median	1.4825	1.2579	18.845	3	0
B8ZZU8;Q15370;I3L0M9;A0A0B4J296	B8ZZU8;Q15370;I3L0M9;A0A0B4J296	4;4;3;2	4;4;3;2	4;4;3;2	Transcription elongation factor B polypeptide 2	TCEB2	tr|B8ZZU8|B8ZZU8_HUMAN Elongin-B OS=Homo sapiens OX=9606 GN=ELOB PE=1 SV=1;sp|Q15370|ELOB_HUMAN Elongin-B OS=Homo sapiens OX=9606 GN=ELOB PE=1 SV=1;tr|I3L0M9|I3L0M9_HUMAN Elongin-B (Fragment) OS=Homo sapiens OX=9606 GN=ELOB PE=1 SV=1;tr|A0A0B4J296|A0A0B4J2	TRUE	4	4	4	4	4	3	4	4	3	4	4	3	4	46	46	46	12.527	113	113;118;140;66	0	24.559	By MS/MS	By MS/MS	By MS/MS	0.58492	0.85235	21.952	13	5	Leave out requantified	0.63739	0.8598	6.9438	13	5	Leave out requantified	1.232	0.99529	28.235	13	5
M0R1B5;E9PL44;E9PJS0;M0R026;A1L0T0	M0R1B5;E9PL44;E9PJS0;M0R026;A1L0T0	1;1;1;1;1	1;1;1;1;1	1;1;1;1;1	Acetolactate synthase-like protein	ILVBL	tr|M0R1B5|M0R1B5_HUMAN Acetolactate synthase-like protein (Fragment) OS=Homo sapiens OX=9606 GN=ILVBL PE=1 SV=8;tr|E9PL44|E9PL44_HUMAN Acetolactate synthase-like protein (Fragment) OS=Homo sapiens OX=9606 GN=ILVBL PE=1 SV=1;tr|E9PJS0|E9PJS0_HUMAN Acetolact	TRUE	5	1	1	1	1	1	1	1	1	1	1	1	1	13.9	13.9	13.9	17.494	165	165;166;262;525;632	0	15.611	By MS/MS	By MS/MS	By MS/MS	0.47006	0.96677	6.1057	7	5	Median	0.41282	0.84883	10.763	6	5	Median	0.85448	0.87416	8.5025	6	5
A0A2R8YD85;Q96BY6;H0YFC5;H7C0I3;F8WE73;A0A2R8Y5U0	A0A2R8YD85;Q96BY6	33;33;5;5;3;3	33;33;5;5;3;3	33;33;5;5;3;3	Dedicator of cytokinesis protein 10	DOCK10	tr|A0A2R8YD85|A0A2R8YD85_HUMAN Dedicator of cytokinesis protein 10 OS=Homo sapiens OX=9606 GN=DOCK10 PE=1 SV=1;sp|Q96BY6|DOC10_HUMAN Dedicator of cytokinesis protein 10 OS=Homo sapiens OX=9606 GN=DOCK10 PE=1 SV=3	TRUE	6	33	33	33	24	27	24	24	27	24	24	27	24	17.7	17.7	17.7	251.31	2199	2199;2186;190;380;142;163	0	114.12	By MS/MS	By MS/MS	By MS/MS	0.73367	1.1611	29.858	77	29	Leave out requantified	0.77751	1.1483	32.133	78	29	Leave out requantified	1.1148	1.0319	30.829	78	29
P52209;K7EM49;K7EMN2;K7EPF6;K7ELN9	P52209;K7EM49	25;13;12;10;5	25;13;12;10;5	25;13;12;10;5	6-phosphogluconate dehydrogenase, decarboxylating	PGD	sp|P52209|6PGD_HUMAN 6-phosphogluconate dehydrogenase, decarboxylating OS=Homo sapiens OX=9606 GN=PGD PE=1 SV=3;tr|K7EM49|K7EM49_HUMAN 6-phosphogluconate dehydrogenase, decarboxylating (Fragment) OS=Homo sapiens OX=9606 GN=PGD PE=1 SV=1	TRUE	5	25	25	25	23	25	23	23	25	23	23	25	23	51.6	51.6	51.6	53.139	483	483;205;160;256;224	0	302.19	By MS/MS	By MS/MS	By MS/MS	0.50686	0.82918	19.358	79	12	Leave out requantified	0.68617	1.0799	14.825	79	12	Leave out requantified	1.3694	1.2819	11.805	79	12
Q9Y678;H0Y8X7;D6RG17	Q9Y678	26;4;1	26;4;1	24;4;1	Coatomer subunit gamma-1	COPG1	sp|Q9Y678|COPG1_HUMAN Coatomer subunit gamma-1 OS=Homo sapiens OX=9606 GN=COPG1 PE=1 SV=1	TRUE	3	26	26	24	23	21	21	23	21	21	21	20	19	38	38	35.7	97.717	874	874;188;49	0	200.1	By MS/MS	By MS/MS	By MS/MS	0.5938	1.021	15.269	75	29	Leave out requantified	0.81215	1.1519	19.063	75	29	Leave out requantified	1.2186	1.166	14.618	75	29
A2AEA2;P10321;O19617;A0A140T921;A0A140T9H5;A0A140T9U8;A0A1W2PRU9	A2AEA2;P10321;O19617;A0A140T921;A0A140T9H5;A0A140T9U8;A0A1W2PRU9	7;7;6;6;6;6;5	1;1;1;1;1;1;1	1;1;1;1;1;1;1	HLA class I histocompatibility antigen, Cw-7 alpha chain	HLA-C	tr|A2AEA2|A2AEA2_HUMAN HLA class I histocompatibility antigen, Cw-6 alpha chain OS=Homo sapiens OX=9606 GN=HLA-C PE=1 SV=2;sp|P10321|1C07_HUMAN HLA class I histocompatibility antigen, Cw-7 alpha chain OS=Homo sapiens OX=9606 GN=HLA-C PE=1 SV=3;tr|O19617|O1	TRUE	7	7	1	1	6	6	7	0	1	1	0	1	1	28.2	4.3	4.3	41.301	372	372;366;366;368;372;397;244	0.0041454	2.1477	By matching	By MS/MS	By MS/MS	0.38417	0.80369	35.549	3	2	Median	0.4785	0.94598	30.562	3	2	Median	1.4	1.458	14.43	3	2
A2IDA3;P29372	A2IDA3;P29372	2;2	2;2	2;2	DNA-3-methyladenine glycosylase	MPG	tr|A2IDA3|A2IDA3_HUMAN DNA-3-methyladenine glycosylase (Fragment) OS=Homo sapiens OX=9606 GN=MPG PE=1 SV=1;sp|P29372|3MG_HUMAN DNA-3-methyladenine glycosylase OS=Homo sapiens OX=9606 GN=MPG PE=1 SV=3	TRUE	2	2	2	2	2	0	1	2	0	1	2	0	1	9.6	9.6	9.6	27.295	251	251;298	0	8.0192	By MS/MS		By MS/MS	0.65419	1.3858	17.694	3	3	Median	2.48	4.7247	20.147	3	3	Median	4.0154	4.0096	30.488	3	3
E9PF32;H0YAY3;A2RUS2	E9PF32;H0YAY3;A2RUS2	3;3;3	3;3;3	3;3;3	DENN domain-containing protein 3	DENND3	tr|E9PF32|E9PF32_HUMAN DENN domain-containing protein 3 OS=Homo sapiens OX=9606 GN=DENND3 PE=1 SV=1;tr|H0YAY3|H0YAY3_HUMAN DENN domain-containing protein 3 (Fragment) OS=Homo sapiens OX=9606 GN=DENND3 PE=1 SV=1;sp|A2RUS2|DEND3_HUMAN DENN domain-containing	TRUE	3	3	3	3	2	1	0	2	1	0	2	1	0	3.7	3.7	3.7	144.32	1278	1278;1203;1198	0	3.987	By MS/MS	By MS/MS		0.40356	0.64821	80.511	2	1	Median	0.54853	0.86275	29.567	2	1	Median	1.3097	1.2368	53.178	2	1
X6RK00;A2VDF0	X6RK00;A2VDF0	1;1	1;1	1;1	Fucose mutarotase	FUOM	tr|X6RK00|X6RK00_HUMAN Fucose mutarotase (Fragment) OS=Homo sapiens OX=9606 GN=FUOM PE=1 SV=2;sp|A2VDF0|FUCM_HUMAN Fucose mutarotase OS=Homo sapiens OX=9606 GN=FUOM PE=1 SV=2	TRUE	2	1	1	1	1	0	1	1	0	1	1	0	1	12.6	12.6	12.6	13.917	127	127;154	0.0071584	1.9224	By MS/MS		By matching	0.5001	0.64579	70.426	2	0	Median	1.3372	1.6915	81.34	2	0	Median	2.6711	2.6404	15.359	2	0
P15309;E9PFE6	P15309	5;2	5;2	5;2	Prostatic acid phosphatase;PAPf39	ACPP	sp|P15309|PPAP_HUMAN Prostatic acid phosphatase OS=Homo sapiens OX=9606 GN=ACPP PE=1 SV=3	TRUE	2	5	5	5	3	4	3	3	4	3	3	4	3	16.1	16.1	16.1	44.566	386	386;165	0	14.982	By MS/MS	By MS/MS	By MS/MS	0.41016	0.67065	55.267	11	8	Median	0.25416	0.37845	64.227	8	5	Median	0.82519	0.77607	50.365	8	5
A6H8Y7;Q6ZRK6	A6H8Y7;Q6ZRK6	1;1	1;1	1;1	Coiled-coil domain-containing protein 73	CCDC73	tr|A6H8Y7|A6H8Y7_HUMAN CCDC73 protein OS=Homo sapiens OX=9606 GN=CCDC73 PE=1 SV=1;sp|Q6ZRK6|CCD73_HUMAN Coiled-coil domain-containing protein 73 OS=Homo sapiens OX=9606 GN=CCDC73 PE=2 SV=2	TRUE	2	1	1	1	0	1	0	0	1	0	0	1	0	8.9	8.9	8.9	18.526	158	158;1079	1	-2		By MS/MS		NaN	NaN	NaN	0	0	Median	NaN	NaN	NaN	0	0	Median	NaN	NaN	NaN	0	0
Q8IV08;M0R1F7;M0R3G9;M0R2W7;E2QRG1	Q8IV08	7;2;1;1;1	7;2;1;1;1	7;2;1;1;1	Phospholipase D3	PLD3	sp|Q8IV08|PLD3_HUMAN Phospholipase D3 OS=Homo sapiens OX=9606 GN=PLD3 PE=1 SV=1	TRUE	5	7	7	7	6	6	7	6	6	7	6	6	7	17.6	17.6	17.6	54.705	490	490;213;71;111;177	0	26.85	By MS/MS	By MS/MS	By MS/MS	0.39212	0.72023	30.018	21	13	Leave out requantified	0.38592	0.71828	41.305	21	13	Leave out requantified	1.0075	0.95821	22.2	21	13
H7BY33;A6NC98	H7BY33;A6NC98	1;1	1;1	1;1	Coiled-coil domain-containing protein 88B	CCDC88B	tr|H7BY33|H7BY33_HUMAN Coiled-coil domain-containing protein 88B OS=Homo sapiens OX=9606 GN=CCDC88B PE=1 SV=1;sp|A6NC98|CC88B_HUMAN Coiled-coil domain-containing protein 88B OS=Homo sapiens OX=9606 GN=CCDC88B PE=1 SV=1	TRUE	2	1	1	1	1	0	1	1	0	1	1	0	1	1.7	1.7	1.7	80.654	712	712;1476	0	3.6949	By MS/MS		By MS/MS	NaN	NaN	NaN	1	1	Median	NaN	NaN	NaN	1	1	Median	NaN	NaN	NaN	1	1
A6NDG6;H3BV17	A6NDG6	4;1	4;1	4;1	Phosphoglycolate phosphatase	PGP	sp|A6NDG6|PGP_HUMAN Glycerol-3-phosphate phosphatase OS=Homo sapiens OX=9606 GN=PGP PE=1 SV=1	TRUE	2	4	4	4	2	2	4	2	2	4	2	2	4	15.6	15.6	15.6	34.006	321	321;57	0	8.8941	By MS/MS	By MS/MS	By MS/MS	0.69958	1.1079	27.934	6	3	Median	0.62162	0.85047	11.978	5	2	Median	0.92515	0.83338	24.199	5	2
Q96A33;A0A087WYW6	Q96A33	4;1	4;1	4;1	Coiled-coil domain-containing protein 47	CCDC47	sp|Q96A33|CCD47_HUMAN Coiled-coil domain-containing protein 47 OS=Homo sapiens OX=9606 GN=CCDC47 PE=1 SV=1	TRUE	2	4	4	4	4	3	2	4	3	2	4	3	2	12.6	12.6	12.6	55.873	483	483;190	0	7.75	By MS/MS	By MS/MS	By MS/MS	0.56679	0.87999	10.848	8	2	Leave out requantified	0.55485	1.0175	15.858	7	1	Leave out requantified	0.93226	0.94898	30.543	7	1
B1AK81;A6NEM5;Q92643	B1AK81;A6NEM5;Q92643	1;1;1	1;1;1	1;1;1	GPI-anchor transamidase	PIGK	tr|B1AK81|B1AK81_HUMAN GPI-anchor transamidase OS=Homo sapiens OX=9606 GN=PIGK PE=1 SV=1;tr|A6NEM5|A6NEM5_HUMAN GPI-anchor transamidase OS=Homo sapiens OX=9606 GN=PIGK PE=1 SV=1;sp|Q92643|GPI8_HUMAN GPI-anchor transamidase OS=Homo sapiens OX=9606 GN=PIGK P	TRUE	3	1	1	1	1	1	1	1	1	1	1	1	1	4	4	4	34.313	301	301;332;395	0.00167	2.6006	By MS/MS	By MS/MS	By MS/MS	0.65774	0.98478	24.271	3	2	Plateau	0.42576	0.82053	11.815	3	2	Median	0.87782	0.81448	23.127	3	2
Q15008;C9J0E9;H7C531;C9J7B7	Q15008	11;3;2;2	11;3;2;2	11;3;2;2	26S proteasome non-ATPase regulatory subunit 6	PSMD6	sp|Q15008|PSMD6_HUMAN 26S proteasome non-ATPase regulatory subunit 6 OS=Homo sapiens OX=9606 GN=PSMD6 PE=1 SV=1	TRUE	4	11	11	11	11	10	8	11	10	8	11	10	8	35.2	35.2	35.2	45.531	389	389;226;138;144	0	39.358	By MS/MS	By MS/MS	By MS/MS	0.47978	0.85048	22.404	32	9	Leave out requantified	0.48732	0.90271	19.962	32	9	Leave out requantified	1.0323	0.96883	22.596	31	9
K7EIN1;K7ESN4;K7EIJ0;K7EIK1;K7ENL2;A6NG10;K7EMC9;Q969T9	K7EIN1;K7ESN4;K7EIJ0;K7EIK1;K7ENL2;A6NG10;K7EMC9;Q969T9	1;1;1;1;1;1;1;1	1;1;1;1;1;1;1;1	1;1;1;1;1;1;1;1	WW domain-binding protein 2	WBP2	tr|K7EIN1|K7EIN1_HUMAN WW domain-binding protein 2 (Fragment) OS=Homo sapiens OX=9606 GN=WBP2 PE=1 SV=1;tr|K7ESN4|K7ESN4_HUMAN WW domain-binding protein 2 (Fragment) OS=Homo sapiens OX=9606 GN=WBP2 PE=1 SV=1;tr|K7EIJ0|K7EIJ0_HUMAN WW domain-binding protein	TRUE	8	1	1	1	1	1	1	1	1	1	1	1	1	8.8	8.8	8.8	11.967	114	114;152;167;205;231;239;257;261	0.0016807	2.6818	By MS/MS	By MS/MS	By MS/MS	0.54087	1.0286	23.718	3	2	Median	0.47076	1.0605	38.565	3	2	Median	0.71569	0.74468	39.044	3	2
H0YA61;F6VZ39;A6NG75;H0Y8S7;Q9BX46;Q9H0Z9	H0YA61;F6VZ39;A6NG75;H0Y8S7;Q9BX46;Q9H0Z9	1;1;1;1;1;1	1;1;1;1;1;1	1;1;1;1;1;1	RNA-binding protein 24;RNA-binding protein 38	RBM24;RBM38	tr|H0YA61|H0YA61_HUMAN RNA-binding protein 24 (Fragment) OS=Homo sapiens OX=9606 GN=RBM24 PE=1 SV=1;tr|F6VZ39|F6VZ39_HUMAN RNA-binding protein 38 OS=Homo sapiens OX=9606 GN=RBM38 PE=1 SV=1;tr|A6NG75|A6NG75_HUMAN RNA-binding protein 38 OS=Homo sapiens OX=96	TRUE	6	1	1	1	0	0	1	0	0	1	0	0	1	13.8	13.8	13.8	8.6689	80	80;123;158;201;236;239	0.0056444	1.9968			By MS/MS	NaN	NaN	NaN	1	0	Median	NaN	NaN	NaN	1	0	Median	NaN	NaN	NaN	1	0
Q9HB40;I3L4Z9;I3L4Z3	Q9HB40	3;1;1	3;1;1	3;1;1	Retinoid-inducible serine carboxypeptidase	SCPEP1	sp|Q9HB40|RISC_HUMAN Retinoid-inducible serine carboxypeptidase OS=Homo sapiens OX=9606 GN=SCPEP1 PE=1 SV=1	TRUE	3	3	3	3	3	3	1	3	3	1	3	3	1	7.5	7.5	7.5	50.83	452	452;135;176	0	9.5358	By MS/MS	By MS/MS	By MS/MS	0.65306	0.95531	13.605	6	3	Median	0.37766	0.50474	14.565	6	3	Median	0.64145	0.59809	18.048	6	3
A6NHR2;Q9BZE1;H0Y4J2;S4R369	A6NHR2;Q9BZE1;H0Y4J2;S4R369	2;2;1;1	2;2;1;1	2;2;1;1	39S ribosomal protein L37, mitochondrial	MRPL37	tr|A6NHR2|A6NHR2_HUMAN 39S ribosomal protein L37, mitochondrial OS=Homo sapiens OX=9606 GN=MRPL37 PE=1 SV=2;sp|Q9BZE1|RM37_HUMAN 39S ribosomal protein L37, mitochondrial OS=Homo sapiens OX=9606 GN=MRPL37 PE=1 SV=2;tr|H0Y4J2|H0Y4J2_HUMAN 39S ribosomal prote	TRUE	4	2	2	2	1	2	1	1	2	1	1	2	1	8.9	8.9	8.9	32.538	292	292;423;264;483	0	8.5037	By MS/MS	By MS/MS	By MS/MS	0.44227	0.8978	22.54	3	1	Median	0.476	0.91145	25.362	3	1	Median	1.2721	1.3094	21.963	3	1
E9PGC0;P20936	E9PGC0;P20936	11;11	11;11	11;11	Ras GTPase-activating protein 1	RASA1	tr|E9PGC0|E9PGC0_HUMAN Ras GTPase-activating protein 1 OS=Homo sapiens OX=9606 GN=RASA1 PE=1 SV=1;sp|P20936|RASA1_HUMAN Ras GTPase-activating protein 1 OS=Homo sapiens OX=9606 GN=RASA1 PE=1 SV=1	TRUE	2	11	11	11	7	7	5	7	7	5	7	7	5	19.4	19.4	19.4	101.79	881	881;1047	0	64.19	By MS/MS	By MS/MS	By MS/MS	0.77728	1.1657	32.802	20	10	Leave out requantified	0.49293	0.67129	13.36	20	10	Leave out requantified	0.62466	0.59688	26.572	20	10
A8MVU1;P14598;A6NI72	A8MVU1;P14598;A6NI72	1;1;1	1;1;1	1;1;1	Putative neutrophil cytosol factor 1C;Neutrophil cytosol factor 1;Putative neutrophil cytosol factor 1B	NCF1C;NCF1;NCF1B	sp|A8MVU1|NCF1C_HUMAN Putative neutrophil cytosol factor 1C OS=Homo sapiens OX=9606 GN=NCF1C PE=5 SV=1;sp|P14598|NCF1_HUMAN Neutrophil cytosol factor 1 OS=Homo sapiens OX=9606 GN=NCF1 PE=1 SV=4;sp|A6NI72|NCF1B_HUMAN Putative neutrophil cytosol factor 1B OS	TRUE	3	1	1	1	0	0	1	0	0	1	0	0	1	6.3	6.3	6.3	41.85	366	366;390;391	0	5.2144			By MS/MS	1.72	2.6847	10.228	2	2	Median	1.9147	2.5398	1.1714	2	2	Median	1.1132	0.93744	11.283	2	2
A6NIR2;X6R7Y7;Q9Y547	A6NIR2;X6R7Y7;Q9Y547	1;1;1	1;1;1	1;1;1	Intraflagellar transport protein 25 homolog	HSPB11	tr|A6NIR2|A6NIR2_HUMAN Chromosome 1 open reading frame 41, isoform CRA_b OS=Homo sapiens OX=9606 GN=HSPB11 PE=1 SV=1;tr|X6R7Y7|X6R7Y7_HUMAN Intraflagellar transport protein 25 homolog OS=Homo sapiens OX=9606 GN=HSPB11 PE=1 SV=1;sp|Q9Y547|IFT25_HUMAN Intraf	TRUE	3	1	1	1	0	1	0	0	1	0	0	1	0	10.7	10.7	10.7	13.028	112	112;214;144	0.0016694	2.6006		By MS/MS		0.68739	1.1014	22.466	2	2	Median	0.54809	0.81367	17.651	2	2	Median	0.79735	0.73011	38.933	2	2
A6NJD9;A8MVT4;A8MYK1;Q16540;H7C2P7	A6NJD9;A8MVT4;A8MYK1;Q16540;H7C2P7	3;3;3;3;2	3;3;3;3;2	3;3;3;3;2	39S ribosomal protein L23, mitochondrial	MRPL23	tr|A6NJD9|A6NJD9_HUMAN 39S ribosomal protein L23, mitochondrial OS=Homo sapiens OX=9606 GN=MRPL23 PE=1 SV=1;tr|A8MVT4|A8MVT4_HUMAN 39S ribosomal protein L23, mitochondrial OS=Homo sapiens OX=9606 GN=MRPL23 PE=1 SV=1;tr|A8MYK1|A8MYK1_HUMAN 39S ribosomal pro	TRUE	5	3	3	3	1	3	2	1	3	2	1	3	2	27.6	27.6	27.6	18.529	163	163;166;191;153;118	0	8.2092	By MS/MS	By MS/MS	By MS/MS	0.36184	0.68533	28.067	4	4	Median	0.43555	0.8486	42.668	4	4	Median	1.1676	1.106	41.852	4	4
J3KQJ1;Q8NBJ7;C9JL30;A8MXB9;C9J660;E9PBT8;H7C3B2;F8WA42;J3QT17;F8WEX5;E9PG02;F8WEV7;F8WES7	J3KQJ1;Q8NBJ7;C9JL30;A8MXB9;C9J660;E9PBT8;H7C3B2;F8WA42;J3QT17	7;7;6;6;6;5;5;5;4;3;3;2;2	7;7;6;6;6;5;5;5;4;3;3;2;2	7;7;6;6;6;5;5;5;4;3;3;2;2	Sulfatase-modifying factor 2	SUMF2	tr|J3KQJ1|J3KQJ1_HUMAN Inactive C-alpha-formylglycine-generating enzyme 2 OS=Homo sapiens OX=9606 GN=SUMF2 PE=1 SV=1;sp|Q8NBJ7|SUMF2_HUMAN Inactive C-alpha-formylglycine-generating enzyme 2 OS=Homo sapiens OX=9606 GN=SUMF2 PE=1 SV=2;tr|C9JL30|C9JL30_HUMAN	TRUE	13	7	7	7	5	6	4	5	6	4	5	6	4	25.3	25.3	25.3	35.922	320	320;301;293;305;352;232;304;358;236;165;183;102;150	0	25.56	By MS/MS	By MS/MS	By MS/MS	0.61274	1.1813	5.6495	16	5	Leave out requantified	0.49149	0.97141	14.683	16	5	Leave out requantified	0.78497	0.74882	14.464	16	5
J3KNE0;Q7Z3J3;A6NKT7	J3KNE0;Q7Z3J3;A6NKT7	1;1;1	1;1;1	1;1;1	RanBP2-like and GRIP domain-containing protein 4;RanBP2-like and GRIP domain-containing protein 3	RGPD3;RGPD4	tr|J3KNE0|J3KNE0_HUMAN RanBP2-like and GRIP domain-containing protein 3 OS=Homo sapiens OX=9606 GN=RGPD3 PE=4 SV=2;sp|Q7Z3J3|RGPD4_HUMAN RanBP2-like and GRIP domain-containing protein 4 OS=Homo sapiens OX=9606 GN=RGPD4 PE=2 SV=3;sp|A6NKT7|RGPD3_HUMAN RanBP	TRUE	3	1	1	1	1	1	1	1	1	1	1	1	1	0.7	0.7	0.7	197.62	1760	1760;1758;1758	0.0026247	2.4432	By MS/MS	By MS/MS	By MS/MS	0.65821	1.0534	16.249	3	0	Median	0.68003	1.0404	9.951	3	0	Plateau	1.0621	1.0198	14.447	3	0
Q8WVY7	Q8WVY7	3	3	3	Ubiquitin-like domain-containing CTD phosphatase 1	UBLCP1	sp|Q8WVY7|UBCP1_HUMAN Ubiquitin-like domain-containing CTD phosphatase 1 OS=Homo sapiens OX=9606 GN=UBLCP1 PE=1 SV=2	TRUE	1	3	3	3	2	3	2	2	3	2	2	3	2	9.4	9.4	9.4	36.804	318	318	0	5.406	By MS/MS	By MS/MS	By MS/MS	0.5924	0.98648	10.989	6	0	Leave out requantified	0.71823	1.0331	22.597	6	0	Leave out requantified	0.99509	0.9557	25.596	6	0
A6NLH6;Q9P003	A6NLH6;Q9P003	1;1	1;1	1;1	Protein cornichon homolog 4	CNIH4	tr|A6NLH6|A6NLH6_HUMAN Protein cornichon homolog 4 OS=Homo sapiens OX=9606 GN=CNIH4 PE=1 SV=1;sp|Q9P003|CNIH4_HUMAN Protein cornichon homolog 4 OS=Homo sapiens OX=9606 GN=CNIH4 PE=1 SV=1	TRUE	2	1	1	1	1	1	1	1	1	1	1	1	1	14.6	14.6	14.6	15.771	137	137;139	0	9.5228	By MS/MS	By MS/MS	By MS/MS	0.49638	1.0236	26.218	6	1	Median	0.55397	1.0783	23.552	6	1	Median	0.9357	0.93147	16.102	6	1
E9PM31;H0YEE2;E9PJK1;E9PRJ8;H0YDL9;H0YDJ9;E9PIF1;A6NMH8;P60033	E9PM31;H0YEE2;E9PJK1;E9PRJ8;H0YDL9;H0YDJ9;E9PIF1;A6NMH8;P60033	1;1;1;1;1;1;1;1;1	1;1;1;1;1;1;1;1;1	1;1;1;1;1;1;1;1;1	Tetraspanin;CD81 antigen	CD81	tr|E9PM31|E9PM31_HUMAN CD81 antigen (Fragment) OS=Homo sapiens OX=9606 GN=CD81 PE=1 SV=8;tr|H0YEE2|H0YEE2_HUMAN Tetraspanin (Fragment) OS=Homo sapiens OX=9606 GN=CD81 PE=1 SV=1;tr|E9PJK1|E9PJK1_HUMAN Tetraspanin OS=Homo sapiens OX=9606 GN=CD81 PE=1 SV=1;tr	TRUE	9	1	1	1	1	1	1	1	1	1	1	1	1	21.7	21.7	21.7	10.027	92	92;148;165;209;221;225;242;274;236	0	91.16	By MS/MS	By MS/MS	By MS/MS	0.73693	1.1246	35.924	4	0	Median	1.0171	1.2922	12.303	4	0	Median	1.1488	1.0707	13.137	4	0
A6NML8;K4DI95;C9J6U3;O60879	A6NML8;K4DI95;C9J6U3;O60879	1;1;1;1	1;1;1;1	1;1;1;1	Protein diaphanous homolog 2	DIAPH2	tr|A6NML8|A6NML8_HUMAN Diaphanous homolog 2 (Drosophila), isoform CRA_c OS=Homo sapiens OX=9606 GN=DIAPH2 PE=1 SV=3;tr|K4DI95|K4DI95_HUMAN Diaphanous homolog 2 (Drosophila), isoform CRA_a OS=Homo sapiens OX=9606 GN=DIAPH2 PE=1 SV=1;tr|C9J6U3|C9J6U3_HUMAN P	TRUE	4	1	1	1	0	1	0	0	1	0	0	1	0	1.4	1.4	1.4	124.85	1096	1096;1101;1103;1101	0.0041428	2.1469		By MS/MS		NaN	NaN	NaN	1	1	Median	NaN	NaN	NaN	1	1	Median	NaN	NaN	NaN	1	1
A6PW57;O14986;Q99755;O60331	A6PW57;O14986;Q99755;O60331	1;1;1;1	1;1;1;1	1;1;1;1	Phosphatidylinositol 4-phosphate 5-kinase type-1 beta;Phosphatidylinositol 4-phosphate 5-kinase type-1 alpha;Phosphatidylinositol 4-phosphate 5-kinase type-1 gamma	PIP5K1A;PIP5K1B;PIP5K1C	tr|A6PW57|A6PW57_HUMAN Phosphatidylinositol 4-phosphate 5-kinase type-1 alpha OS=Homo sapiens OX=9606 GN=PIP5K1A PE=1 SV=2;sp|O14986|PI51B_HUMAN Phosphatidylinositol 4-phosphate 5-kinase type-1 beta OS=Homo sapiens OX=9606 GN=PIP5K1B PE=1 SV=2;sp|Q99755|PI	TRUE	4	1	1	1	0	1	0	0	1	0	0	1	0	2.5	2.5	2.5	61.257	550	550;540;562;668	0.0091296	1.7779		By MS/MS		NaN	NaN	NaN	1	1	Median	NaN	NaN	NaN	1	1	Median	NaN	NaN	NaN	1	1
H0Y8D1;A6XGL3;CON__P07477;E7EQ64;P07477	H0Y8D1;A6XGL3;CON__P07477;E7EQ64;P07477	1;1;1;1;1	1;1;1;1;1	1;1;1;1;1	Trypsin-1;Alpha-trypsin chain 1;Alpha-trypsin chain 2	PRSS1	tr|H0Y8D1|H0Y8D1_HUMAN Trypsin-1 (Fragment) OS=Homo sapiens OX=9606 GN=PRSS1 PE=1 SV=1;tr|A6XGL3|A6XGL3_HUMAN Protease serine 1 OS=Homo sapiens OX=9606 GN=PRSS1 PE=1 SV=1;;tr|E7EQ64|E7EQ64_HUMAN Trypsin-1 OS=Homo sapiens OX=9606 GN=PRSS1 PE=1 SV=1;sp|P0747	TRUE	5	1	1	1	1	0	0	1	0	0	1	0	0	7	7	7	15.421	142	142;237;247;261;247	0.007134	1.8967	By MS/MS			NaN	NaN	NaN	0	0	Median	NaN	NaN	NaN	0	0	Median	NaN	NaN	NaN	0	0
Q5TCU3;CON__Q3SX28;A7XZE4;Q5TCU8;P07951;U3KQK2	Q5TCU3;CON__Q3SX28;A7XZE4;Q5TCU8;P07951	10;10;10;10;10;3	2;2;2;2;2;1	2;2;2;2;2;1	Tropomyosin beta chain	TPM2;TPM2b	tr|Q5TCU3|Q5TCU3_HUMAN Tropomyosin beta chain OS=Homo sapiens OX=9606 GN=TPM2 PE=1 SV=1;;tr|A7XZE4|A7XZE4_HUMAN Beta tropomyosin isoform OS=Homo sapiens OX=9606 GN=TPM2 PE=1 SV=1;tr|Q5TCU8|Q5TCU8_HUMAN Tropomyosin beta chain OS=Homo sapiens OX=9606 GN=TPM2	TRUE	6	10	2	2	7	9	10	2	1	2	2	1	2	25.7	8.1	8.1	32.814	284	284;284;284;322;284;111	0	5.4476	By MS/MS	By MS/MS	By MS/MS	0.53429	0.87016	8.1159	5	0	Leave out requantified	0.58165	0.85196	18.775	5	0	Leave out requantified	1.1564	1.0521	24.687	5	0
A8K7Q2;E9PS65;E9PM13	A8K7Q2	23;10;5	1;0;0	1;0;0		HSPA8	tr|A8K7Q2|A8K7Q2_HUMAN Heat shock cognate 71 kDa protein OS=Homo sapiens OX=9606 GN=HSPA8 PE=1 SV=1	TRUE	3	23	1	1	20	21	20	1	1	1	1	1	1	49	2.2	2.2	45.338	410	410;223;150	0.00035907	3.4452	By MS/MS	By MS/MS	By MS/MS	0.62871	0.84165	20.495	3	1	Plateau	0.65063	0.82611	9.3173	3	1	Plateau	1.1747	1.0086	12.569	3	1
P45973;F8VNY3	P45973;F8VNY3	2;1	2;1	2;1	Chromobox protein homolog 5	CBX5	sp|P45973|CBX5_HUMAN Chromobox protein homolog 5 OS=Homo sapiens OX=9606 GN=CBX5 PE=1 SV=1;tr|F8VNY3|F8VNY3_HUMAN Chromobox protein homolog 5 (Fragment) OS=Homo sapiens OX=9606 GN=CBX5 PE=1 SV=1	TRUE	2	2	2	2	2	2	1	2	2	1	2	2	1	9.9	9.9	9.9	22.225	191	191;91	0	7.1674	By MS/MS	By MS/MS	By MS/MS	0.58712	0.89304	21.261	5	0	Leave out requantified	0.4683	0.64775	0.46551	5	0	Leave out requantified	0.91194	0.82704	20.466	5	0
Q15813;A0A2R8Y5Q8;A0A2R8YHI9;A0A2R8Y7E7;A0A2U3TZJ6;A0A2R8Y784;A0A2R8Y6Q1;A0A2R8YFL4;A0A2R8Y809;A0A2R8Y4V6;A0A2R8YER9;A0A2R8YFM3;A0A2R8Y4P2;A0A2R8Y6G3;A0A2R8Y787;A0A2R8Y5H6;A0A2R8Y897;A0A2R8Y4E7;A0A2R8Y6L2;A0A2R8Y7H8;A0A2R8YF12	Q15813;A0A2R8Y5Q8;A0A2R8YHI9;A0A2R8Y7E7;A0A2U3TZJ6;A0A2R8Y784;A0A2R8Y6Q1;A0A2R8YFL4;A0A2R8Y809;A0A2R8Y4V6;A0A2R8YER9	5;5;5;4;4;3;3;3;3;3;3;2;2;2;2;2;1;1;1;1;1	5;5;5;4;4;3;3;3;3;3;3;2;2;2;2;2;1;1;1;1;1	5;5;5;4;4;3;3;3;3;3;3;2;2;2;2;2;1;1;1;1;1	Tubulin-specific chaperone E	TBCE	sp|Q15813|TBCE_HUMAN Tubulin-specific chaperone E OS=Homo sapiens OX=9606 GN=TBCE PE=1 SV=1;tr|A0A2R8Y5Q8|A0A2R8Y5Q8_HUMAN Tubulin-specific chaperone E OS=Homo sapiens OX=9606 GN=TBCE PE=1 SV=1;tr|A0A2R8YHI9|A0A2R8YHI9_HUMAN Tubulin-specific chaperone E OS	TRUE	21	5	5	5	3	5	2	3	5	2	3	5	2	15	15	15	59.345	527	527;549;520;487;464;217;414;370;311;252;235;248;160;159;139;127;110;175;134;116;61	0	10.698	By MS/MS	By MS/MS	By MS/MS	0.6154	1.1158	14.196	8	3	Leave out requantified	0.5376	0.91701	17.888	8	3	Leave out requantified	1.0004	0.8844	15.185	8	3
A8MU27;A8MUA9;P55854	A8MU27;A8MUA9;P55854	2;2;2	2;2;2	1;1;1	Small ubiquitin-related modifier 3	SUMO3	tr|A8MU27|A8MU27_HUMAN Small ubiquitin-related modifier 3 OS=Homo sapiens OX=9606 GN=SUMO3 PE=1 SV=1;tr|A8MUA9|A8MUA9_HUMAN SMT3 suppressor of mif two 3 homolog 3 (Yeast), isoform CRA_d OS=Homo sapiens OX=9606 GN=SUMO3 PE=1 SV=1;sp|P55854|SUMO3_HUMAN Small	TRUE	3	2	2	1	2	2	1	2	2	1	1	1	0	14.3	14.3	6.1	16.956	147	147;135;103	0	9.8484	By MS/MS	By MS/MS	By MS/MS	0.62617	0.96046	58.109	7	4	Median	0.68741	0.91777	62.97	7	4	Median	1.5287	1.2873	22.483	7	4
Q12965;H0YNQ8;H0YN00;H0YLJ4;H0YLE5	Q12965	27;9;3;3;2	27;9;3;3;2	22;9;3;2;1	Unconventional myosin-Ie	MYO1E	sp|Q12965|MYO1E_HUMAN Unconventional myosin-Ie OS=Homo sapiens OX=9606 GN=MYO1E PE=1 SV=2	TRUE	5	27	27	22	19	22	20	19	22	20	15	17	15	28	28	23	127.06	1108	1108;317;112;276;187	0	192.48	By MS/MS	By MS/MS	By MS/MS	0.73602	1.1617	17.354	74	24	Leave out requantified	0.81916	1.1917	18.616	74	24	Leave out requantified	1.0757	1.0006	16.937	74	24
C9JXR7;A8MVM1;P42574	C9JXR7;A8MVM1;P42574	2;2;2	2;2;2	2;2;2	Caspase-3;Caspase-3 subunit p17;Caspase-3 subunit p12	CASP3	tr|C9JXR7|C9JXR7_HUMAN Caspase-3 (Fragment) OS=Homo sapiens OX=9606 GN=CASP3 PE=1 SV=2;tr|A8MVM1|A8MVM1_HUMAN Caspase-3 OS=Homo sapiens OX=9606 GN=CASP3 PE=1 SV=2;sp|P42574|CASP3_HUMAN Caspase-3 OS=Homo sapiens OX=9606 GN=CASP3 PE=1 SV=2	TRUE	3	2	2	2	1	2	1	1	2	1	1	2	1	20.5	20.5	20.5	13.366	117	117;182;277	0.00070847	3.2748	By MS/MS	By MS/MS	By MS/MS	0.37407	1.1397	25.51	3	2	Plateau	0.75852	1.435	23.845	3	2	Plateau	1.5489	1.5258	31.651	3	2
B4DLR8;P15559;H3BRK3;H3BNV2	B4DLR8;P15559;H3BRK3;H3BNV2	7;7;6;5	7;7;6;5	7;7;6;5	NAD(P)H dehydrogenase [quinone] 1	NQO1	tr|B4DLR8|B4DLR8_HUMAN NAD(P)H dehydrogenase [quinone] 1 OS=Homo sapiens OX=9606 GN=NQO1 PE=1 SV=1;sp|P15559|NQO1_HUMAN NAD(P)H dehydrogenase [quinone] 1 OS=Homo sapiens OX=9606 GN=NQO1 PE=1 SV=1;tr|H3BRK3|H3BRK3_HUMAN NAD(P)H dehydrogenase [quinone] 1 OS=	TRUE	4	7	7	7	7	5	6	7	5	6	7	5	6	34.2	34.2	34.2	22.793	202	202;274;269;253	0	18.549	By MS/MS	By MS/MS	By MS/MS	0.53676	0.79524	17.068	15	2	Leave out requantified	0.69697	0.90354	3.9516	15	2	Leave out requantified	1.427	1.3357	5.2266	15	2
E7EPM6;P33121;B7Z3Z9;H0Y9U7;D6RER0;H0Y9Z9;D6RG07;E7ERD7;Q9UKU0	E7EPM6;P33121;B7Z3Z9	11;11;10;5;5;3;1;1;1	11;11;10;5;5;3;1;1;1	10;10;9;4;5;3;1;1;1	Long-chain-fatty-acid--CoA ligase 1	ACSL1	tr|E7EPM6|E7EPM6_HUMAN Long-chain-fatty-acid--CoA ligase 1 OS=Homo sapiens OX=9606 GN=ACSL1 PE=1 SV=1;sp|P33121|ACSL1_HUMAN Long-chain-fatty-acid--CoA ligase 1 OS=Homo sapiens OX=9606 GN=ACSL1 PE=1 SV=1;tr|B7Z3Z9|B7Z3Z9_HUMAN Long-chain-fatty-acid--CoA lig	TRUE	9	11	11	10	9	9	10	9	9	10	8	8	9	19.4	19.4	17.8	74.281	664	664;698;527;294;388;94;126;677;697	0	38.476	By MS/MS	By MS/MS	By MS/MS	0.61757	1.0496	24.772	30	10	Leave out requantified	0.96278	1.6178	38.596	30	10	Leave out requantified	1.7274	1.6529	41.118	30	10
M0R1E7;M0QXG5;M0R088;E9PCT1;A9Z1X7;Q8IYB3	M0R1E7;M0QXG5;M0R088;E9PCT1;A9Z1X7;Q8IYB3	1;1;1;1;1;1	1;1;1;1;1;1	1;1;1;1;1;1	Serine/arginine repetitive matrix protein 1	SRRM1	tr|M0R1E7|M0R1E7_HUMAN Serine/arginine repetitive matrix protein 1 OS=Homo sapiens OX=9606 GN=SRRM1 PE=1 SV=1;tr|M0QXG5|M0QXG5_HUMAN Serine/arginine repetitive matrix protein 1 (Fragment) OS=Homo sapiens OX=9606 GN=SRRM1 PE=1 SV=8;tr|M0R088|M0R088_HUMAN Se	TRUE	6	1	1	1	1	1	1	1	1	1	1	1	1	15.2	15.2	15.2	9.2246	79	79;101;681;820;913;904	0.0013573	2.7757	By MS/MS	By MS/MS	By matching	0.43084	0.70888	14.853	3	0	Plateau	0.74316	1.1473	33.99	3	0	Plateau	1.5742	1.4065	40.905	3	0
P07108;A0A0A0MTI5;B8ZWD1	P07108;A0A0A0MTI5;B8ZWD1	8;6;6	8;6;6	8;6;6	Acyl-CoA-binding protein	DBI	sp|P07108|ACBP_HUMAN Acyl-CoA-binding protein OS=Homo sapiens OX=9606 GN=DBI PE=1 SV=2;tr|A0A0A0MTI5|A0A0A0MTI5_HUMAN Acyl-CoA-binding protein OS=Homo sapiens OX=9606 GN=DBI PE=1 SV=1;tr|B8ZWD1|B8ZWD1_HUMAN Acyl-CoA-binding protein OS=Homo sapiens OX=9606	TRUE	3	8	8	8	7	7	7	7	7	7	7	7	7	82.8	82.8	82.8	10.044	87	87;143;97	0	62.557	By MS/MS	By MS/MS	By MS/MS	0.78347	1.1179	8.483	34	7	Leave out requantified	0.57885	0.79005	9.3695	34	7	Leave out requantified	0.74001	0.68596	13.796	34	7
P40616;B4DZG7;F8VYN9;F8VP99;F8W1Z8;F8VP63	P40616;B4DZG7;F8VYN9	3;2;2;1;1;1	3;2;2;1;1;1	3;2;2;1;1;1	ADP-ribosylation factor-like protein 1	ARL1	sp|P40616|ARL1_HUMAN ADP-ribosylation factor-like protein 1 OS=Homo sapiens OX=9606 GN=ARL1 PE=1 SV=1;tr|B4DZG7|B4DZG7_HUMAN cDNA FLJ50309, highly similar to ADP-ribosylation factor-like protein 1 OS=Homo sapiens OX=9606 GN=ARL1 PE=1 SV=1;tr|F8VYN9|F8VYN9_	TRUE	6	3	3	3	3	2	0	3	2	0	3	2	0	22.7	22.7	22.7	20.417	181	181;135;194;17;52;64	0	7.4635	By MS/MS	By MS/MS		0.60322	0.83618	22.724	5	3	Median	0.78548	1.0159	18.8	5	3	Median	1.4664	1.317	9.7528	5	3
H3BPC4;H3BQQ9;B0QYN7;P63279	H3BPC4;H3BQQ9;B0QYN7;P63279	2;2;2;2	2;2;2;2	2;2;2;2	SUMO-conjugating enzyme UBC9	UBE2I	tr|H3BPC4|H3BPC4_HUMAN SUMO-conjugating enzyme UBC9 (Fragment) OS=Homo sapiens OX=9606 GN=UBE2I PE=1 SV=2;tr|H3BQQ9|H3BQQ9_HUMAN SUMO-conjugating enzyme UBC9 (Fragment) OS=Homo sapiens OX=9606 GN=UBE2I PE=1 SV=1;tr|B0QYN7|B0QYN7_HUMAN SUMO-conjugating enzy	TRUE	4	2	2	2	2	1	0	2	1	0	2	1	0	32.9	32.9	32.9	7.8891	70	70;137;184;158	0.003252	2.3734	By MS/MS	By MS/MS		0.679	1.0767	12.43	3	3	Median	0.6369	0.94943	10.307	3	3	Plateau	0.93686	0.8953	22.358	3	3
P55809;E9PDW2;Q9BYC2	P55809	5;2;1	5;2;1	5;2;1	Succinyl-CoA:3-ketoacid coenzyme A transferase 1, mitochondrial	OXCT1	sp|P55809|SCOT1_HUMAN Succinyl-CoA:3-ketoacid coenzyme A transferase 1, mitochondrial OS=Homo sapiens OX=9606 GN=OXCT1 PE=1 SV=1	TRUE	3	5	5	5	5	3	5	5	3	5	5	3	5	16.7	16.7	16.7	56.157	520	520;334;517	0	39.168	By MS/MS	By MS/MS	By MS/MS	0.5631	0.93265	23.791	13	9	Leave out requantified	0.51518	0.79561	22.231	12	8	Leave out requantified	0.99985	0.94107	42.379	12	8
B0S8I6;Q14320;Q9Y247	B0S8I6;Q14320;Q9Y247	2;2;1	2;2;1	2;2;1	Protein FAM50A;Protein FAM50B	FAM50A;FAM50B	tr|B0S8I6|B0S8I6_HUMAN Protein FAM50A (Fragment) OS=Homo sapiens OX=9606 GN=FAM50A PE=1 SV=1;sp|Q14320|FA50A_HUMAN Protein FAM50A OS=Homo sapiens OX=9606 GN=FAM50A PE=1 SV=2;sp|Q9Y247|FA50B_HUMAN Protein FAM50B OS=Homo sapiens OX=9606 GN=FAM50B PE=1 SV=1	TRUE	3	2	2	2	1	2	0	1	2	0	1	2	0	10.4	10.4	10.4	30.693	260	260;339;325	0.0013643	2.8244	By MS/MS	By MS/MS		NaN	NaN	NaN	1	0	Median	NaN	NaN	NaN	1	0	Median	NaN	NaN	NaN	1	0
Q7L2H7;H0YCQ8;J3KNJ2;E9PRI2;E9PN86;E7ESM3	Q7L2H7;H0YCQ8	6;4;2;1;1;1	6;4;2;1;1;1	6;4;2;1;1;1	Eukaryotic translation initiation factor 3 subunit M	EIF3M	sp|Q7L2H7|EIF3M_HUMAN Eukaryotic translation initiation factor 3 subunit M OS=Homo sapiens OX=9606 GN=EIF3M PE=1 SV=1;tr|H0YCQ8|H0YCQ8_HUMAN Eukaryotic translation initiation factor 3 subunit M (Fragment) OS=Homo sapiens OX=9606 GN=EIF3M PE=1 SV=8	TRUE	6	6	6	6	5	4	4	5	4	4	5	4	4	26.5	26.5	26.5	42.502	374	374;220;191;59;102;123	0	54.064	By MS/MS	By MS/MS	By MS/MS	0.58857	0.96447	8.5853	12	5	Leave out requantified	0.61557	1.0933	17.788	12	5	Leave out requantified	1.2662	1.22	1.7612	12	5
Q04917;A2IDB2;F8WEB6;A2IDB1	Q04917	15;6;4;4	12;5;3;3	12;5;3;3	14-3-3 protein eta	YWHAH	sp|Q04917|1433F_HUMAN 14-3-3 protein eta OS=Homo sapiens OX=9606 GN=YWHAH PE=1 SV=4	TRUE	4	15	12	12	14	12	11	12	9	8	12	9	8	54.9	50.8	50.8	28.218	246	246;162;39;72	0	65.252	By MS/MS	By MS/MS	By MS/MS	0.51279	0.84474	19.747	28	6	Leave out requantified	0.56609	0.76765	19.582	27	5	Leave out requantified	1.036	0.96338	11.251	27	5
A0A1B0GU86;Q03154;C9JMV9;A0A1B0GW23;A0A1B0GV31;A0A1B0GVA5;A0A1B0GTG3;F8WC59;C9JYZ0	A0A1B0GU86;Q03154;C9JMV9;A0A1B0GW23	7;7;6;6;3;2;1;1;1	7;7;6;6;3;2;1;1;1	7;7;6;6;3;2;1;1;1	Aminoacylase-1	ACY1;ABHD14A-ACY1	tr|A0A1B0GU86|A0A1B0GU86_HUMAN Aminoacylase-1 OS=Homo sapiens OX=9606 GN=ACY1 PE=4 SV=1;sp|Q03154|ACY1_HUMAN Aminoacylase-1 OS=Homo sapiens OX=9606 GN=ACY1 PE=1 SV=1;tr|C9JMV9|C9JMV9_HUMAN ABHD14A-ACY1 readthrough OS=Homo sapiens OX=9606 GN=ABHD14A-ACY1 PE	TRUE	9	7	7	7	6	6	4	6	6	4	6	6	4	23.6	23.6	23.6	42.179	373	373;408;509;586;275;264;113;201;228	0	18.318	By MS/MS	By MS/MS	By MS/MS	0.61802	1.1024	27.758	15	6	Leave out requantified	0.36816	0.66143	20.047	15	6	Leave out requantified	0.75924	0.74704	21.068	15	6
B1AHA8;P09601	B1AHA8;P09601	1;1	1;1	1;1	Heme oxygenase 1	HMOX1	tr|B1AHA8|B1AHA8_HUMAN Heme oxygenase 1 (Fragment) OS=Homo sapiens OX=9606 GN=HMOX1 PE=1 SV=1;sp|P09601|HMOX1_HUMAN Heme oxygenase 1 OS=Homo sapiens OX=9606 GN=HMOX1 PE=1 SV=1	TRUE	2	1	1	1	1	1	1	1	1	1	1	1	1	12.8	12.8	12.8	21.583	187	187;288	0.0016722	2.6166	By MS/MS	By MS/MS	By MS/MS	0.59536	0.87663	47.377	2	1	Median	0.82485	1.0747	71.612	2	1	Median	2.5811	2.4622	44.978	3	1
Q6P2E9;I3L0V0;I3L3M2	Q6P2E9	8;1;1	8;1;1	8;1;1	Enhancer of mRNA-decapping protein 4	EDC4	sp|Q6P2E9|EDC4_HUMAN Enhancer of mRNA-decapping protein 4 OS=Homo sapiens OX=9606 GN=EDC4 PE=1 SV=1	TRUE	3	8	8	8	4	6	3	4	6	3	4	6	3	9.4	9.4	9.4	151.66	1401	1401;154;176	0	35.52	By MS/MS	By MS/MS	By MS/MS	0.48148	0.924	25.239	11	8	Leave out requantified	0.49214	0.94094	32.627	11	8	Leave out requantified	1.0673	1.027	74.98	11	8
C9J0C0;C9JBA0;B1AJU2;E2QRE5;Q9Y228	C9J0C0;C9JBA0;B1AJU2;E2QRE5;Q9Y228	1;1;1;1;1	1;1;1;1;1	1;1;1;1;1	TRAF3-interacting JNK-activating modulator	TRAF3IP3	tr|C9J0C0|C9J0C0_HUMAN TRAF3-interacting JNK-activating modulator (Fragment) OS=Homo sapiens OX=9606 GN=TRAF3IP3 PE=1 SV=1;tr|C9JBA0|C9JBA0_HUMAN TRAF3-interacting JNK-activating modulator OS=Homo sapiens OX=9606 GN=TRAF3IP3 PE=1 SV=1;tr|B1AJU2|B1AJU2_HUMA	TRUE	5	1	1	1	1	1	1	1	1	1	1	1	1	12.2	12.2	12.2	11.636	98	98;156;182;404;551	0.00035689	3.3748	By MS/MS	By MS/MS	By MS/MS	0.57699	1.1279	16.447	4	3	Median	0.56551	1.0765	17.261	4	3	Median	0.99222	0.99953	11.927	4	3
H7BXI1;A0A087WXU3;A0FGR8	H7BXI1;A0A087WXU3;A0FGR8	16;15;15	16;15;15	16;15;15	Extended synaptotagmin-2	ESYT2	tr|H7BXI1|H7BXI1_HUMAN Extended synaptotagmin-2 (Fragment) OS=Homo sapiens OX=9606 GN=ESYT2 PE=1 SV=1;tr|A0A087WXU3|A0A087WXU3_HUMAN Extended synaptotagmin-2 OS=Homo sapiens OX=9606 GN=ESYT2 PE=1 SV=1;sp|A0FGR8|ESYT2_HUMAN Extended synaptotagmin-2 OS=Homo	TRUE	3	16	16	16	13	12	12	13	12	12	13	12	12	28.3	28.3	28.3	98.008	884	884;921;921	0	67.333	By MS/MS	By MS/MS	By MS/MS	0.65518	1.2008	16.316	36	10	Leave out requantified	0.61463	1.0383	27.691	37	10	Leave out requantified	0.94617	0.8953	11.533	37	10
P13861;H7C330;H7C1L0;C9J830;P31323;H7C4A9	P13861	12;5;5;2;2;1	12;5;5;2;2;1	12;5;5;2;2;1	cAMP-dependent protein kinase type II-alpha regulatory subunit	PRKAR2A	sp|P13861|KAP2_HUMAN cAMP-dependent protein kinase type II-alpha regulatory subunit OS=Homo sapiens OX=9606 GN=PRKAR2A PE=1 SV=2	TRUE	6	12	12	12	9	8	7	9	8	7	9	8	7	42.1	42.1	42.1	45.518	404	404;92;200;114;418;99	0	59.379	By MS/MS	By MS/MS	By MS/MS	0.6863	1.2718	14.372	28	18	Leave out requantified	0.47372	0.74397	17.842	27	17	Leave out requantified	0.68713	0.6192	10.239	27	17
P82673;H0YG82	P82673;H0YG82	2;1	2;1	2;1	28S ribosomal protein S35, mitochondrial	MRPS35	sp|P82673|RT35_HUMAN 28S ribosomal protein S35, mitochondrial OS=Homo sapiens OX=9606 GN=MRPS35 PE=1 SV=1;tr|H0YG82|H0YG82_HUMAN 28S ribosomal protein S35, mitochondrial (Fragment) OS=Homo sapiens OX=9606 GN=MRPS35 PE=1 SV=1	TRUE	2	2	2	2	2	2	2	2	2	2	2	2	2	11.5	11.5	11.5	36.844	323	323;162	0	10.081	By MS/MS	By MS/MS	By MS/MS	0.61276	0.8676	19.843	6	3	Median	0.7303	0.941	31.316	6	3	Median	1.0944	1.0072	23.623	6	3
Q96C86;A0A3B3ITF0	Q96C86;A0A3B3ITF0	7;5	7;5	7;5	m7GpppX diphosphatase	DCPS	sp|Q96C86|DCPS_HUMAN m7GpppX diphosphatase OS=Homo sapiens OX=9606 GN=DCPS PE=1 SV=2;tr|A0A3B3ITF0|A0A3B3ITF0_HUMAN m7GpppX diphosphatase OS=Homo sapiens OX=9606 GN=DCPS PE=1 SV=1	TRUE	2	7	7	7	6	5	5	6	5	5	6	5	5	26.4	26.4	26.4	38.608	337	337;244	0	24.551	By MS/MS	By MS/MS	By MS/MS	0.54036	1.0367	19.551	17	10	Leave out requantified	0.43804	0.85023	9.8894	17	10	Leave out requantified	0.88502	0.85285	7.8892	17	10
B1AMB1;B1AMB2;Q9BPZ7	B1AMB1;B1AMB2;Q9BPZ7	1;1;1	1;1;1	1;1;1	Target of rapamycin complex 2 subunit MAPKAP1	MAPKAP1	tr|B1AMB1|B1AMB1_HUMAN Target of rapamycin complex 2 subunit MAPKAP1 (Fragment) OS=Homo sapiens OX=9606 GN=MAPKAP1 PE=1 SV=1;tr|B1AMB2|B1AMB2_HUMAN Target of rapamycin complex 2 subunit MAPKAP1 (Fragment) OS=Homo sapiens OX=9606 GN=MAPKAP1 PE=1 SV=1;sp|Q9B	TRUE	3	1	1	1	1	1	1	1	1	1	1	1	1	15.1	15.1	15.1	10.36	93	93;132;522	0	8.7418	By MS/MS	By MS/MS	By MS/MS	0.58304	1.1249	9.5782	3	0	Median	0.60062	1.1714	3.1589	3	0	Plateau	0.95669	0.98834	13.231	3	0
Q9H0E2;F2Z2Y8;E7EN89;E9PNS3;E9PP67;E9PQ25	Q9H0E2;F2Z2Y8;E7EN89	3;2;2;1;1;1	3;2;2;1;1;1	3;2;2;1;1;1	Toll-interacting protein	TOLLIP	sp|Q9H0E2|TOLIP_HUMAN Toll-interacting protein OS=Homo sapiens OX=9606 GN=TOLLIP PE=1 SV=1;tr|F2Z2Y8|F2Z2Y8_HUMAN Toll-interacting protein OS=Homo sapiens OX=9606 GN=TOLLIP PE=1 SV=1;tr|E7EN89|E7EN89_HUMAN Toll interacting protein, isoform CRA_b OS=Homo sa	TRUE	6	3	3	3	3	3	2	3	3	2	3	3	2	13.1	13.1	13.1	30.281	274	274;213;246;80;179;186	0	14.47	By MS/MS	By MS/MS	By MS/MS	0.49519	0.93728	15.785	8	1	Leave out requantified	0.57399	0.9215	11.329	8	1	Leave out requantified	1.2108	1.1345	10.031	8	1
B1ANH5;Q16774;B1ANH0;B1ANG9;B1ANH6;B1ANH2;B1ANH3	B1ANH5;Q16774;B1ANH0;B1ANG9;B1ANH6;B1ANH2;B1ANH3	2;2;1;1;1;1;1	2;2;1;1;1;1;1	2;2;1;1;1;1;1	Guanylate kinase	GUK1	tr|B1ANH5|B1ANH5_HUMAN Guanylate kinase OS=Homo sapiens OX=9606 GN=GUK1 PE=1 SV=1;sp|Q16774|KGUA_HUMAN Guanylate kinase OS=Homo sapiens OX=9606 GN=GUK1 PE=1 SV=2;tr|B1ANH0|B1ANH0_HUMAN Guanylate kinase (Fragment) OS=Homo sapiens OX=9606 GN=GUK1 PE=1 SV=1;t	TRUE	7	2	2	2	1	2	1	1	2	1	1	2	1	19.1	19.1	19.1	21.999	199	199;197;217;235;242;253;272	0	3.7971	By MS/MS	By MS/MS	By MS/MS	0.49839	0.83347	27.867	4	1	Median	0.44347	0.74946	14.799	4	1	Median	0.87732	0.86434	7.634	4	1
P13498;H3BR52;H3BNP7	P13498	3;1;1	3;1;1	2;0;0	Cytochrome b-245 light chain	CYBA	sp|P13498|CY24A_HUMAN Cytochrome b-245 light chain OS=Homo sapiens OX=9606 GN=CYBA PE=1 SV=3	TRUE	3	3	3	2	2	2	1	2	2	1	1	2	1	24.6	24.6	21	21.012	195	195;128;210	0	17.361	By MS/MS	By MS/MS	By MS/MS	0.54588	0.89302	30.429	5	2	Median	0.52059	0.66088	12.998	5	2	Linear	0.86152	0.78202	27.126	5	2
B1APM4;P35610	B1APM4;P35610	1;1	1;1	1;1	Sterol O-acyltransferase 1	SOAT1	tr|B1APM4|B1APM4_HUMAN Sterol O-acyltransferase 1 (Fragment) OS=Homo sapiens OX=9606 GN=SOAT1 PE=1 SV=1;sp|P35610|SOAT1_HUMAN Sterol O-acyltransferase 1 OS=Homo sapiens OX=9606 GN=SOAT1 PE=1 SV=3	TRUE	2	1	1	1	0	1	0	0	1	0	0	1	0	5.4	5.4	5.4	29.892	260	260;550	0.0073778	1.8465		By MS/MS		NaN	NaN	NaN	1	1	Median	NaN	NaN	NaN	1	1	Median	NaN	NaN	NaN	1	1
B1AUU8;P42566	B1AUU8;P42566	3;3	3;3	3;3	Epidermal growth factor receptor substrate 15	EPS15	tr|B1AUU8|B1AUU8_HUMAN Epidermal growth factor receptor substrate 15 OS=Homo sapiens OX=9606 GN=EPS15 PE=1 SV=1;sp|P42566|EPS15_HUMAN Epidermal growth factor receptor substrate 15 OS=Homo sapiens OX=9606 GN=EPS15 PE=1 SV=2	TRUE	2	3	3	3	3	1	2	3	1	2	3	1	2	7.1	7.1	7.1	83.653	762	762;896	0	9.4121	By MS/MS	By MS/MS	By MS/MS	0.70808	0.98712	16.45	3	1	Plateau	0.50292	0.71896	10.847	3	1	Median	0.73956	0.67144	19.737	3	1
R4GMR5;P48556;K7EJR3;K7EJC1;K7ENY6;K7ERW6	R4GMR5;P48556;K7EJR3	9;9;6;4;2;1	9;9;6;4;2;1	9;9;6;4;2;1	26S proteasome non-ATPase regulatory subunit 8	PSMD8	tr|R4GMR5|R4GMR5_HUMAN 26S proteasome non-ATPase regulatory subunit 8 OS=Homo sapiens OX=9606 GN=PSMD8 PE=1 SV=1;sp|P48556|PSMD8_HUMAN 26S proteasome non-ATPase regulatory subunit 8 OS=Homo sapiens OX=9606 GN=PSMD8 PE=1 SV=2;tr|K7EJR3|K7EJR3_HUMAN 26S prot	TRUE	6	9	9	9	8	6	7	8	6	7	8	6	7	37.3	37.3	37.3	32.551	287	287;350;250;172;129;67	0	33.489	By MS/MS	By MS/MS	By MS/MS	0.56075	0.92917	13.275	19	4	Leave out requantified	0.68504	1.0142	18.759	19	4	Leave out requantified	1.0579	0.97145	19.261	19	4
Q7L014;A0A0C4DG89;D6RJA6	Q7L014;A0A0C4DG89;D6RJA6	2;2;1	2;2;1	2;2;1	Probable ATP-dependent RNA helicase DDX46	DDX46	sp|Q7L014|DDX46_HUMAN Probable ATP-dependent RNA helicase DDX46 OS=Homo sapiens OX=9606 GN=DDX46 PE=1 SV=2;tr|A0A0C4DG89|A0A0C4DG89_HUMAN Probable ATP-dependent RNA helicase DDX46 OS=Homo sapiens OX=9606 GN=DDX46 PE=1 SV=1;tr|D6RJA6|D6RJA6_HUMAN DEAD (Asp-	TRUE	3	2	2	2	2	2	2	2	2	2	2	2	2	2.1	2.1	2.1	117.36	1031	1031;1032;471	0	4.8795	By MS/MS	By MS/MS	By MS/MS	0.54118	0.93061	1.617	6	0	Leave out requantified	0.61141	0.99122	13.567	6	0	Leave out requantified	0.92929	0.89388	16.443	6	0
H3BUR9;B3KY94;O14735	H3BUR9;B3KY94;O14735	1;1;1	1;1;1	1;1;1	CDP-diacylglycerol--inositol 3-phosphatidyltransferase	CDIPT	tr|H3BUR9|H3BUR9_HUMAN CDP-diacylglycerol--inositol 3-phosphatidyltransferase OS=Homo sapiens OX=9606 GN=CDIPT PE=1 SV=1;tr|B3KY94|B3KY94_HUMAN CDP-diacylglycerol--inositol 3-phosphatidyltransferase OS=Homo sapiens OX=9606 GN=CDIPT PE=1 SV=1;sp|O14735|CDIP	TRUE	3	1	1	1	1	1	1	1	1	1	1	1	1	7	7	7	17.335	157	157;237;213	0.0053342	2.0143	By MS/MS	By MS/MS	By MS/MS	0.80878	1.5889	19.641	4	4	Linear	0.53829	1.0327	11.461	4	4	Median	0.86806	0.84051	25.36	4	4
B4DDK6;O14925;Q5SRD1	B4DDK6;O14925;Q5SRD1	1;1;1	1;1;1	1;1;1	Mitochondrial import inner membrane translocase subunit Tim23;Putative mitochondrial import inner membrane translocase subunit Tim23B	TIMM23B;TIMM23	tr|B4DDK6|B4DDK6_HUMAN Putative mitochondrial import inner membrane translocase subunit Tim23B OS=Homo sapiens OX=9606 GN=TIMM23B PE=2 SV=1;sp|O14925|TIM23_HUMAN Mitochondrial import inner membrane translocase subunit Tim23 OS=Homo sapiens OX=9606 GN=TIMM2	TRUE	3	1	1	1	1	1	1	1	1	1	1	1	1	12.1	12.1	12.1	14.6	140	140;209;257	0	10.763	By MS/MS	By MS/MS	By MS/MS	0.65997	0.93321	27.924	3	1	Median	0.82379	1.0173	11.22	3	1	Plateau	0.9857	0.93212	33.42	3	1
Q13435;E9PPJ0;E9PJ04;H0YCG1;E9PJT3;H0YEX5;E9PIL8	Q13435;E9PPJ0	24;23;11;11;8;6;1	24;23;11;11;8;6;1	24;23;11;11;8;6;1	Splicing factor 3B subunit 2	SF3B2	sp|Q13435|SF3B2_HUMAN Splicing factor 3B subunit 2 OS=Homo sapiens OX=9606 GN=SF3B2 PE=1 SV=2;tr|E9PPJ0|E9PPJ0_HUMAN Splicing factor 3B subunit 2 OS=Homo sapiens OX=9606 GN=SF3B2 PE=1 SV=1	TRUE	7	24	24	24	13	22	16	13	22	16	13	22	16	40.3	40.3	40.3	100.23	895	895;878;353;387;273;315;80	0	146.45	By MS/MS	By MS/MS	By MS/MS	0.49027	0.83593	26.103	48	14	Leave out requantified	0.58082	0.85776	21.428	48	14	Leave out requantified	1.1334	1.0789	25.533	46	14
A0A087X2D0;P84103	A0A087X2D0;P84103	5;5	4;4	4;4	Serine/arginine-rich splicing factor 3	SRSF3	tr|A0A087X2D0|A0A087X2D0_HUMAN Serine/arginine-rich-splicing factor 3 OS=Homo sapiens OX=9606 GN=SRSF3 PE=1 SV=1;sp|P84103|SRSF3_HUMAN Serine/arginine-rich splicing factor 3 OS=Homo sapiens OX=9606 GN=SRSF3 PE=1 SV=1	TRUE	2	5	4	4	4	5	4	3	4	3	3	4	3	49.5	49.5	49.5	10.32	95	95;164	0	29.776	By MS/MS	By MS/MS	By MS/MS	0.43616	0.69626	32.533	12	3	Leave out requantified	0.44269	0.7215	45.391	12	3	Leave out requantified	1.1001	1.1122	27.943	12	3
B4DGJ5;Q8N7H5	B4DGJ5;Q8N7H5	2;2	2;2	2;2	RNA polymerase II-associated factor 1 homolog	PAF1	tr|B4DGJ5|B4DGJ5_HUMAN RNA polymerase II-associated factor 1 homolog OS=Homo sapiens OX=9606 GN=PAF1 PE=1 SV=1;sp|Q8N7H5|PAF1_HUMAN RNA polymerase II-associated factor 1 homolog OS=Homo sapiens OX=9606 GN=PAF1 PE=1 SV=2	TRUE	2	2	2	2	1	0	1	1	0	1	1	0	1	8.7	8.7	8.7	32.92	288	288;531	0	3.6734	By MS/MS		By MS/MS	NaN	NaN	NaN	1	0	Median	NaN	NaN	NaN	1	0	Median	NaN	NaN	NaN	1	0
P38117;M0QY67	P38117;M0QY67	10;5	10;5	10;5	Electron transfer flavoprotein subunit beta	ETFB	sp|P38117|ETFB_HUMAN Electron transfer flavoprotein subunit beta OS=Homo sapiens OX=9606 GN=ETFB PE=1 SV=3;tr|M0QY67|M0QY67_HUMAN Electron transfer flavoprotein subunit beta (Fragment) OS=Homo sapiens OX=9606 GN=ETFB PE=1 SV=1	TRUE	2	10	10	10	8	8	9	8	8	9	8	8	9	36.5	36.5	36.5	27.843	255	255;178	0	24.849	By MS/MS	By MS/MS	By MS/MS	0.44845	0.86282	20.15	27	10	Leave out requantified	0.50198	0.8711	10.015	27	10	Leave out requantified	1.1104	0.97036	19.025	27	10
H3BRY6;B4DVT3;B4DJL6;Q96SY0	H3BRY6;B4DVT3;B4DJL6;Q96SY0	2;2;2;2	2;2;2;2	2;2;2;2	von Willebrand factor A domain-containing protein 9	VWA9	tr|H3BRY6|H3BRY6_HUMAN Integrator complex subunit 14 OS=Homo sapiens OX=9606 GN=INTS14 PE=1 SV=1;tr|B4DVT3|B4DVT3_HUMAN Integrator complex subunit 14 OS=Homo sapiens OX=9606 GN=INTS14 PE=1 SV=1;tr|B4DJL6|B4DJL6_HUMAN Integrator complex subunit 14 OS=Homo s	TRUE	4	2	2	2	2	1	0	2	1	0	2	1	0	7.1	7.1	7.1	51.583	468	468;482;554;518	0.0065564	1.9438	By MS/MS	By MS/MS		0.56233	0.75855	21.949	3	0	Median	2.7239	3.3189	74.625	3	0	Plateau	3.4139	2.8399	58.239	3	0
Q8IXQ6;G5E9U8	Q8IXQ6	11;3	11;3	11;3	Poly [ADP-ribose] polymerase 9	PARP9	sp|Q8IXQ6|PARP9_HUMAN Protein mono-ADP-ribosyltransferase PARP9 OS=Homo sapiens OX=9606 GN=PARP9 PE=1 SV=2	TRUE	2	11	11	11	7	9	9	7	9	9	7	9	9	17.3	17.3	17.3	96.342	854	854;399	0	29.623	By MS/MS	By MS/MS	By MS/MS	0.77576	1.288	39.933	27	4	Leave out requantified	1.2801	2.0905	18.172	27	4	Leave out requantified	1.8765	1.6375	48.135	26	4
O00178	O00178	2	2	2	GTP-binding protein 1	GTPBP1	sp|O00178|GTPB1_HUMAN GTP-binding protein 1 OS=Homo sapiens OX=9606 GN=GTPBP1 PE=1 SV=3	TRUE	1	2	2	2	2	2	2	2	2	2	2	2	2	4.2	4.2	4.2	72.453	669	669	0	12.081	By MS/MS	By MS/MS	By MS/MS	0.53484	0.97546	18.295	6	0	Leave out requantified	0.62995	1.1065	21.242	6	0	Leave out requantified	1.1272	1.1292	37.833	6	0
Q9BRR6;H3BRS6;H3BTH4;H3BN66;H3BU35	Q9BRR6;H3BRS6	7;4;2;2;1	7;4;2;2;1	7;4;2;2;1	ADP-dependent glucokinase	ADPGK	sp|Q9BRR6|ADPGK_HUMAN ADP-dependent glucokinase OS=Homo sapiens OX=9606 GN=ADPGK PE=1 SV=1;tr|H3BRS6|H3BRS6_HUMAN ADP-dependent glucokinase (Fragment) OS=Homo sapiens OX=9606 GN=ADPGK PE=1 SV=1	TRUE	5	7	7	7	6	6	3	6	6	3	6	6	3	23.1	23.1	23.1	54.088	497	497;204;57;113;154	0	75.557	By MS/MS	By MS/MS	By MS/MS	0.63782	0.90809	9.0327	17	7	Leave out requantified	0.65983	0.95092	21.092	17	7	Leave out requantified	1.0943	1.0804	13.87	17	7
P26010;F5H6T4;F8VNX4;F8W186;H3BRM2;H3BRX4	P26010;F5H6T4	9;7;4;1;1;1	9;7;4;1;1;1	9;7;4;1;1;1	Integrin beta-7;Integrin beta	ITGB7	sp|P26010|ITB7_HUMAN Integrin beta-7 OS=Homo sapiens OX=9606 GN=ITGB7 PE=1 SV=1;tr|F5H6T4|F5H6T4_HUMAN Integrin beta OS=Homo sapiens OX=9606 GN=ITGB7 PE=1 SV=1	TRUE	6	9	9	9	9	7	6	9	7	6	9	7	6	13.5	13.5	13.5	86.902	798	798;471;158;88;93;117	0	40.762	By MS/MS	By MS/MS	By MS/MS	0.67017	0.99848	21.474	24	12	Leave out requantified	0.85908	1.1229	24.574	24	12	Leave out requantified	1.1359	1.0608	10.977	24	12
C9JUN4;C9J168;B4DP31;Q14558;C9JKT9;C9JNQ3	C9JUN4;C9J168;B4DP31;Q14558;C9JKT9	3;3;3;3;2;1	3;3;3;3;2;1	3;3;3;3;2;1	Phosphoribosyl pyrophosphate synthase-associated protein 1	PRPSAP1	tr|C9JUN4|C9JUN4_HUMAN Phosphoribosyl pyrophosphate synthase-associated protein 1 (Fragment) OS=Homo sapiens OX=9606 GN=PRPSAP1 PE=1 SV=2;tr|C9J168|C9J168_HUMAN Phosphoribosyl pyrophosphate synthase-associated protein 1 (Fragment) OS=Homo sapiens OX=9606 G	TRUE	6	3	3	3	0	2	1	0	2	1	0	2	1	28	28	28	17.524	157	157;230;282;356;89;104	0	8.1117		By MS/MS	By MS/MS	0.47762	0.79235	50.531	3	3	Median	NaN	NaN	NaN	1	1	Median	NaN	NaN	NaN	1	1
P36507;A0A1B0GUL7	P36507;A0A1B0GUL7	5;3	4;2	4;2	Dual specificity mitogen-activated protein kinase kinase 2	MAP2K2	sp|P36507|MP2K2_HUMAN Dual specificity mitogen-activated protein kinase kinase 2 OS=Homo sapiens OX=9606 GN=MAP2K2 PE=1 SV=1;tr|A0A1B0GUL7|A0A1B0GUL7_HUMAN Uncharacterized protein OS=Homo sapiens OX=9606 PE=1 SV=1	TRUE	2	5	4	4	3	4	3	2	3	2	2	3	2	14.8	12.5	12.5	44.424	400	400;405	0	7.9567	By MS/MS	By MS/MS	By MS/MS	0.48707	0.78934	27.132	7	1	Leave out requantified	0.57834	0.8712	18.442	7	1	Leave out requantified	1.0054	0.95451	20.978	7	1
O95352;C9J415;C9JFF4;C9JE55;C9JGL2;F8WDY9;C9JNU2;C9JKA3;H7C2R3;H7BZ92;H7C2J8;H7C059	O95352	11;5;5;4;3;3;3;3;2;2;2;1	11;5;5;4;3;3;3;3;2;2;2;1	11;5;5;4;3;3;3;3;2;2;2;1	Ubiquitin-like modifier-activating enzyme ATG7	ATG7	sp|O95352|ATG7_HUMAN Ubiquitin-like modifier-activating enzyme ATG7 OS=Homo sapiens OX=9606 GN=ATG7 PE=1 SV=1	TRUE	12	11	11	11	8	7	4	8	7	4	8	7	4	19.8	19.8	19.8	77.959	703	703;152;176;126;66;76;89;93;95;96;139;105	0	52.12	By MS/MS	By MS/MS	By MS/MS	0.70175	1.165	22.83	19	11	Leave out requantified	0.81643	1.1895	15.343	19	11	Leave out requantified	0.97686	0.93197	19.441	19	11
I3L0Y9;I3L2M4;B4DWA1;I3L4C2;Q9UQB8	I3L0Y9;I3L2M4;B4DWA1;I3L4C2;Q9UQB8	1;1;1;1;1	1;1;1;1;1	1;1;1;1;1	Brain-specific angiogenesis inhibitor 1-associated protein 2	BAIAP2	tr|I3L0Y9|I3L0Y9_HUMAN Brain-specific angiogenesis inhibitor 1-associated protein 2 (Fragment) OS=Homo sapiens OX=9606 GN=BAIAP2 PE=1 SV=1;tr|I3L2M4|I3L2M4_HUMAN Brain-specific angiogenesis inhibitor 1-associated protein 2 (Fragment) OS=Homo sapiens OX=960	TRUE	5	1	1	1	0	1	0	0	1	0	0	1	0	20.8	20.8	20.8	13.623	130	130;234;375;553;552	0.00036088	3.4853		By MS/MS		NaN	NaN	NaN	1	1	Median	NaN	NaN	NaN	1	1	Median	NaN	NaN	NaN	1	1
E7EU85;E9PFF5;B4DXZ6;P51114;C9JZE0;C9JY20	E7EU85;E9PFF5;B4DXZ6;P51114	3;3;3;3;1;1	2;2;2;2;1;1	2;2;2;2;1;1	Fragile X mental retardation syndrome-related protein 1	FXR1	tr|E7EU85|E7EU85_HUMAN Fragile X mental retardation syndrome-related protein 1 OS=Homo sapiens OX=9606 GN=FXR1 PE=1 SV=1;tr|E9PFF5|E9PFF5_HUMAN Fragile X mental retardation syndrome-related protein 1 OS=Homo sapiens OX=9606 GN=FXR1 PE=1 SV=1;tr|B4DXZ6|B4DX	TRUE	6	3	2	2	2	1	3	1	0	2	1	0	2	8.1	6.4	6.4	50.99	454	454;490;608;621;119;123	0	3.8859	By MS/MS	By matching	By MS/MS	0.61503	1.0548	12.091	2	2	Median	NaN	NaN	NaN	0	0	Median	NaN	NaN	NaN	0	0
P68133;P68032;P63267;P62736;A6NL76;F8WB63;B8ZZJ2;C9JFL5;F6UVQ4;F6QUT6	P68133;P68032;P63267;P62736;A6NL76	26;26;23;23;21;12;12;12;12;12	5;5;3;3;5;3;3;3;3;3	5;5;3;3;5;3;3;3;3;3	Actin, alpha skeletal muscle;Actin, alpha cardiac muscle 1;Actin, gamma-enteric smooth muscle;Actin, aortic smooth muscle	ACTA1;ACTC1;ACTG2;ACTA2	sp|P68133|ACTS_HUMAN Actin, alpha skeletal muscle OS=Homo sapiens OX=9606 GN=ACTA1 PE=1 SV=1;sp|P68032|ACTC_HUMAN Actin, alpha cardiac muscle 1 OS=Homo sapiens OX=9606 GN=ACTC1 PE=1 SV=1;sp|P63267|ACTH_HUMAN Actin, gamma-enteric smooth muscle OS=Homo sapie	TRUE	10	26	5	5	21	24	23	4	5	4	4	5	4	38.5	9	9	42.051	377	377;377;376;377;254;105;119;144;151;151	0	151.19	By MS/MS	By MS/MS	By MS/MS	0.68917	0.95099	12.058	57	2	Leave out requantified	0.68327	0.82048	18.665	57	2	Leave out requantified	0.89611	0.84749	8.5078	56	2
B4E1G1;E5RGY0;Q9BUN8	B4E1G1;E5RGY0;Q9BUN8	1;1;1	1;1;1	1;1;1	Derlin-1	DERL1	tr|B4E1G1|B4E1G1_HUMAN Derlin OS=Homo sapiens OX=9606 GN=DERL1 PE=1 SV=1;tr|E5RGY0|E5RGY0_HUMAN Derlin OS=Homo sapiens OX=9606 GN=DERL1 PE=1 SV=1;sp|Q9BUN8|DERL1_HUMAN Derlin-1 OS=Homo sapiens OX=9606 GN=DERL1 PE=1 SV=1	TRUE	3	1	1	1	1	0	1	1	0	1	1	0	1	7.3	7.3	7.3	17.033	151	151;151;251	0	5.6317	By MS/MS		By MS/MS	0.47469	0.93657	12.299	3	3	Plateau	0.51359	1.0159	4.4043	3	3	Median	1.0716	1.0691	11.038	3	3
B5MBZ0;Q9HC35	B5MBZ0;Q9HC35	3;3	3;3	3;3	Echinoderm microtubule-associated protein-like 4	EML4	tr|B5MBZ0|B5MBZ0_HUMAN Echinoderm microtubule-associated protein-like 4 OS=Homo sapiens OX=9606 GN=EML4 PE=1 SV=3;sp|Q9HC35|EMAL4_HUMAN Echinoderm microtubule-associated protein-like 4 OS=Homo sapiens OX=9606 GN=EML4 PE=1 SV=3	TRUE	2	3	3	3	0	3	0	0	3	0	0	3	0	5.2	5.2	5.2	110.18	992	992;981	0	3.9264		By MS/MS		0.06127	0.13724	114.72	3	1	Plateau	0.47444	0.86312	25.325	2	0	Median	NaN	NaN	NaN	1	0
B5MC59;P35244	B5MC59;P35244	2;2	2;2	2;2	Replication protein A 14 kDa subunit	RPA3	tr|B5MC59|B5MC59_HUMAN Replication protein A 14 kDa subunit OS=Homo sapiens OX=9606 GN=RPA3 PE=1 SV=1;sp|P35244|RFA3_HUMAN Replication protein A 14 kDa subunit OS=Homo sapiens OX=9606 GN=RPA3 PE=1 SV=1	TRUE	2	2	2	2	1	1	1	1	1	1	1	1	1	32.9	32.9	32.9	9.1703	82	82;121	0	6.3083	By MS/MS	By MS/MS	By MS/MS	NaN	NaN	NaN	1	1	Median	NaN	NaN	NaN	1	1	Median	NaN	NaN	NaN	1	1
Q9HCU5;B5MC98;F8WCS5	Q9HCU5;B5MC98;F8WCS5	2;2;1	2;2;1	2;2;1	Prolactin regulatory element-binding protein	PREB	sp|Q9HCU5|PREB_HUMAN Prolactin regulatory element-binding protein OS=Homo sapiens OX=9606 GN=PREB PE=1 SV=2;tr|B5MC98|B5MC98_HUMAN Prolactin regulatory element-binding protein OS=Homo sapiens OX=9606 GN=PREB PE=1 SV=1;tr|F8WCS5|F8WCS5_HUMAN Prolactin regul	TRUE	3	2	2	2	2	1	1	2	1	1	2	1	1	10.8	10.8	10.8	45.468	417	417;359;50	0	4.8996	By MS/MS	By MS/MS	By MS/MS	0.75401	1.2139	35.085	3	0	Median	0.84454	1.2692	25.01	3	0	Median	1.0366	0.90743	14.513	3	0
C9JQQ5;B5MCN0;Q8NHH9	C9JQQ5;B5MCN0;Q8NHH9	1;1;1	1;1;1	1;1;1	Atlastin-2	ATL2	tr|C9JQQ5|C9JQQ5_HUMAN Atlastin-2 (Fragment) OS=Homo sapiens OX=9606 GN=ATL2 PE=1 SV=1;tr|B5MCN0|B5MCN0_HUMAN Atlastin-2 OS=Homo sapiens OX=9606 GN=ATL2 PE=1 SV=1;sp|Q8NHH9|ATLA2_HUMAN Atlastin-2 OS=Homo sapiens OX=9606 GN=ATL2 PE=1 SV=2	TRUE	3	1	1	1	0	0	1	0	0	1	0	0	1	8.6	8.6	8.6	20.3	175	175;413;583	0.0013633	2.8233			By MS/MS	NaN	NaN	NaN	1	0	Median	NaN	NaN	NaN	1	0	Median	NaN	NaN	NaN	1	0
B5MD00;Q9P0U1	B5MD00;Q9P0U1	2;2	2;2	2;2	Mitochondrial import receptor subunit TOM7 homolog	TOMM7	tr|B5MD00|B5MD00_HUMAN Mitochondrial import receptor subunit TOM7 homolog OS=Homo sapiens OX=9606 GN=TOMM7 PE=1 SV=1;sp|Q9P0U1|TOM7_HUMAN Mitochondrial import receptor subunit TOM7 homolog OS=Homo sapiens OX=9606 GN=TOMM7 PE=1 SV=1	TRUE	2	2	2	2	1	0	1	1	0	1	1	0	1	35.3	35.3	35.3	5.6718	51	51;55	0	10.915	By MS/MS		By MS/MS	NaN	NaN	NaN	1	0	Median	NaN	NaN	NaN	1	0	Median	NaN	NaN	NaN	1	0
P61221;D6R9I9;H0Y990;D6RGF4	P61221;D6R9I9;H0Y990;D6RGF4	10;9;5;5	10;9;5;5	10;9;5;5	ATP-binding cassette sub-family E member 1	ABCE1	sp|P61221|ABCE1_HUMAN ATP-binding cassette sub-family E member 1 OS=Homo sapiens OX=9606 GN=ABCE1 PE=1 SV=1;tr|D6R9I9|D6R9I9_HUMAN ATP-binding cassette sub-family E member 1 OS=Homo sapiens OX=9606 GN=ABCE1 PE=1 SV=1;tr|H0Y990|H0Y990_HUMAN ATP-binding cass	TRUE	4	10	10	10	8	10	7	8	10	7	8	10	7	23.7	23.7	23.7	67.314	599	599;421;147;210	0	53.266	By MS/MS	By MS/MS	By MS/MS	0.5627	0.87279	28.314	27	19	Leave out requantified	0.78268	1.0559	14.625	27	19	Leave out requantified	1.1182	0.98671	14.657	27	19
B7WPG3;C9IYN3;D6W592;Q8WVV9	B7WPG3;C9IYN3;D6W592;Q8WVV9	1;1;1;1	1;1;1;1	1;1;1;1	Heterogeneous nuclear ribonucleoprotein L-like	HNRNPLL;HNRPLL	tr|B7WPG3|B7WPG3_HUMAN Heterogeneous nuclear ribonucleoprotein L-like OS=Homo sapiens OX=9606 GN=HNRNPLL PE=1 SV=1;tr|C9IYN3|C9IYN3_HUMAN Heterogeneous nuclear ribonucleoprotein L-like, isoform CRA_a OS=Homo sapiens OX=9606 GN=HNRNPLL PE=1 SV=2;tr|D6W592|D	TRUE	4	1	1	1	1	1	1	1	1	1	1	1	1	3.5	3.5	3.5	56.45	508	508;537;542;542	0	5.118	By MS/MS	By MS/MS	By MS/MS	0.62962	1.2559	8.9428	5	5	Median	0.68503	1.3597	5.1426	5	5	Median	1.1033	1.1339	10.067	5	5
B7Z524;H0YDX7;J3QT46;Q9Y450;E9PHZ9;E9PS53	B7Z524;H0YDX7;J3QT46;Q9Y450;E9PHZ9	3;3;3;3;2;1	3;3;3;3;2;1	1;1;1;1;1;1	HBS1-like protein	HBS1L	tr|B7Z524|B7Z524_HUMAN cDNA FLJ52343, highly similar to HBS1-like protein OS=Homo sapiens OX=9606 GN=HBS1L PE=1 SV=1;tr|H0YDX7|H0YDX7_HUMAN HBS1-like protein (Fragment) OS=Homo sapiens OX=9606 GN=HBS1L PE=1 SV=1;tr|J3QT46|J3QT46_HUMAN HBS1-like protein OS=	TRUE	6	3	3	1	0	2	1	0	2	1	0	1	0	11.7	11.7	4.4	56.961	520	520;554;619;684;243;142	0.00035575	3.3447		By MS/MS	By MS/MS	0.59107	0.89445	34.201	2	2	Median	0.43615	0.60811	20.598	2	2	Median	0.73789	0.6616	49.55	2	2
E9PNX9;B7Z5P7;O60711	E9PNX9;B7Z5P7;O60711	1;1;1	1;1;1	1;1;1	Leupaxin	LPXN	tr|E9PNX9|E9PNX9_HUMAN Leupaxin OS=Homo sapiens OX=9606 GN=LPXN PE=1 SV=1;tr|B7Z5P7|B7Z5P7_HUMAN cDNA FLJ51550, highly similar to Leupaxin OS=Homo sapiens OX=9606 GN=LPXN PE=1 SV=1;sp|O60711|LPXN_HUMAN Leupaxin OS=Homo sapiens OX=9606 GN=LPXN PE=1 SV=1	TRUE	3	1	1	1	1	1	1	1	1	1	1	1	1	18.9	18.9	18.9	11.854	106	106;366;386	0	11.004	By MS/MS	By MS/MS	By MS/MS	0.69335	1.1104	9.3341	3	0	Plateau	0.98522	1.2633	33.701	3	0	Median	1.3361	1.2832	15.134	3	0
B7Z637;Q8IUR7;C9J8P8;C9JAA7;C9JBY2;C9J2I1;G5E9V7;G5E9V6	B7Z637;Q8IUR7;C9J8P8;C9JAA7;C9JBY2;C9J2I1;G5E9V7;G5E9V6	2;2;1;1;1;1;1;1	2;2;1;1;1;1;1;1	2;2;1;1;1;1;1;1	Armadillo repeat-containing protein 8	ARMC8	tr|B7Z637|B7Z637_HUMAN Armadillo repeat containing 8, isoform CRA_g OS=Homo sapiens OX=9606 GN=ARMC8 PE=1 SV=1;sp|Q8IUR7|ARMC8_HUMAN Armadillo repeat-containing protein 8 OS=Homo sapiens OX=9606 GN=ARMC8 PE=1 SV=2;tr|C9J8P8|C9J8P8_HUMAN Armadillo repeat-co	TRUE	8	2	2	2	0	1	1	0	1	1	0	1	1	3.7	3.7	3.7	67.185	600	600;673;130;198;227;352;357;399	0	3.8735		By MS/MS	By MS/MS	NaN	NaN	NaN	0	0	Median	NaN	NaN	NaN	0	0	Median	NaN	NaN	NaN	0	0
B7Z645;H0YAA0	B7Z645	26;1	1;1	1;1		SYNCRIP	tr|B7Z645|B7Z645_HUMAN Synaptotagmin binding, cytoplasmic RNA interacting protein, isoform CRA_b OS=Homo sapiens OX=9606 GN=SYNCRIP PE=1 SV=1	TRUE	2	26	1	1	20	22	23	1	1	1	1	1	1	51.1	2.2	2.2	52.046	464	464;97	0.0059505	1.9909	By MS/MS	By MS/MS	By MS/MS	NaN	NaN	NaN	0	0	Median	NaN	NaN	NaN	0	0	Median	NaN	NaN	NaN	0	0
Q13283;E5RIZ6;E5RI46;E5RIF8;E5RH42;E5RJU8;E5RH00	Q13283	11;4;3;3;3;3;2	11;4;3;3;3;3;2	10;3;2;2;2;2;1	Ras GTPase-activating protein-binding protein 1	G3BP1	sp|Q13283|G3BP1_HUMAN Ras GTPase-activating protein-binding protein 1 OS=Homo sapiens OX=9606 GN=G3BP1 PE=1 SV=1	TRUE	7	11	11	10	9	11	9	9	11	9	8	10	8	32	32	29.4	52.164	466	466;148;105;106;117;153;37	0	96.73	By MS/MS	By MS/MS	By MS/MS	0.55428	1.0171	14.749	32	13	Leave out requantified	0.6033	0.963	21.088	32	13	Leave out requantified	1.0506	0.98105	17.705	32	13
B7Z934;Q9HAK2	B7Z934;Q9HAK2	1;1	1;1	1;1	Transcription factor COE2	EBF2	tr|B7Z934|B7Z934_HUMAN cDNA FLJ55302, highly similar to Transcription factor COE2 OS=Homo sapiens OX=9606 GN=EBF2 PE=1 SV=1;sp|Q9HAK2|COE2_HUMAN Transcription factor COE2 OS=Homo sapiens OX=9606 GN=EBF2 PE=2 SV=4	TRUE	2	1	1	1	1	0	0	1	0	0	1	0	0	2.6	2.6	2.6	45.967	427	427;575	0.0071517	1.918	By MS/MS			NaN	NaN	NaN	1	0	Median	NaN	NaN	NaN	1	0	Median	NaN	NaN	NaN	1	0
Q9Y376;A0A087X0K1;B7ZBJ4;Q5TAW7;Q9H9S4	Q9Y376;A0A087X0K1	14;13;1;1;1	14;13;1;1;1	14;13;1;1;1	Calcium-binding protein 39	CAB39	sp|Q9Y376|CAB39_HUMAN Calcium-binding protein 39 OS=Homo sapiens OX=9606 GN=CAB39 PE=1 SV=1;tr|A0A087X0K1|A0A087X0K1_HUMAN Calcium-binding protein 39 OS=Homo sapiens OX=9606 GN=CAB39 PE=1 SV=1	TRUE	5	14	14	14	12	12	9	12	12	9	12	12	9	37.2	37.2	37.2	39.869	341	341;339;193;280;337	0	32.146	By MS/MS	By MS/MS	By MS/MS	0.71106	1.1879	24.767	35	12	Leave out requantified	0.74386	1.1129	17.228	35	12	Leave out requantified	0.9494	0.94469	21.878	35	12
F6T4W9;B7ZKW8;Q6JBY9	F6T4W9;B7ZKW8;Q6JBY9	1;1;1	1;1;1	1;1;1	CapZ-interacting protein	RCSD1	tr|F6T4W9|F6T4W9_HUMAN CapZ-interacting protein (Fragment) OS=Homo sapiens OX=9606 GN=RCSD1 PE=1 SV=1;tr|B7ZKW8|B7ZKW8_HUMAN CapZ-interacting protein OS=Homo sapiens OX=9606 GN=RCSD1 PE=1 SV=1;sp|Q6JBY9|CPZIP_HUMAN CapZ-interacting protein OS=Homo sapiens	TRUE	3	1	1	1	0	0	1	0	0	1	0	0	1	13.2	13.2	13.2	21.009	197	197;386;416	0	12.419			By MS/MS	NaN	NaN	NaN	0	0	Median	NaN	NaN	NaN	0	0	Median	NaN	NaN	NaN	0	0
C9JEL3;B9A044;B8ZZ50;O60573	C9JEL3;B9A044;B8ZZ50;O60573	1;1;1;1	1;1;1;1	1;1;1;1	Eukaryotic translation initiation factor 4E type 2	EIF4E2	tr|C9JEL3|C9JEL3_HUMAN Eukaryotic translation initiation factor 4E type 2 (Fragment) OS=Homo sapiens OX=9606 GN=EIF4E2 PE=1 SV=1;tr|B9A044|B9A044_HUMAN Eukaryotic translation initiation factor 4E type 2 OS=Homo sapiens OX=9606 GN=EIF4E2 PE=1 SV=1;tr|B8ZZ50	TRUE	4	1	1	1	1	0	0	1	0	0	1	0	0	9.9	9.9	9.9	24.602	213	213;233;236;245	0	5.9262	By MS/MS			NaN	NaN	NaN	1	1	Median	NaN	NaN	NaN	1	1	Median	NaN	NaN	NaN	1	1
B8ZZA8;B8ZZC5	B8ZZA8;B8ZZC5	3;2	2;2	2;2		GLS	tr|B8ZZA8|B8ZZA8_HUMAN Glutaminase kidney isoform, mitochondrial OS=Homo sapiens OX=9606 GN=GLS PE=1 SV=1;tr|B8ZZC5|B8ZZC5_HUMAN Glutaminase kidney isoform, mitochondrial OS=Homo sapiens OX=9606 GN=GLS PE=1 SV=1	TRUE	2	3	2	2	3	1	1	2	1	1	2	1	1	24.9	20.1	20.1	18.634	169	169;103	0	13.835	By MS/MS	By MS/MS	By MS/MS	0.64071	1.1633	28.931	4	1	Median	0.71291	1.4843	15.635	4	1	Median	1.0531	1.0051	28.129	4	1
C9J128;C9J2Z6;C9J173;B8ZZF6;E7ET59;E7EUX4;E7ENF2;P49441	C9J128;C9J2Z6;C9J173;B8ZZF6;E7ET59;E7EUX4;E7ENF2;P49441	1;1;1;1;1;1;1;1	1;1;1;1;1;1;1;1	1;1;1;1;1;1;1;1	Inositol polyphosphate 1-phosphatase	INPP1	tr|C9J128|C9J128_HUMAN Inositol polyphosphate 1-phosphatase (Fragment) OS=Homo sapiens OX=9606 GN=INPP1 PE=1 SV=1;tr|C9J2Z6|C9J2Z6_HUMAN Inositol polyphosphate 1-phosphatase (Fragment) OS=Homo sapiens OX=9606 GN=INPP1 PE=1 SV=1;tr|C9J173|C9J173_HUMAN Inosi	TRUE	8	1	1	1	1	0	1	1	0	1	1	0	1	17.6	17.6	17.6	7.8381	68	68;88;143;155;190;212;213;399	0.0013482	2.7057	By MS/MS		By MS/MS	0.56869	0.81073	21.29	2	0	Median	0.619	0.78523	2.1819	2	0	Median	0.89614	0.7976	19.551	2	0
B8ZZF8;Q9Y4Y9	B8ZZF8;Q9Y4Y9	1;1	1;1	1;1	U6 snRNA-associated Sm-like protein LSm5	LSM5	tr|B8ZZF8|B8ZZF8_HUMAN U6 snRNA-associated Sm-like protein LSm5 OS=Homo sapiens OX=9606 GN=LSM5 PE=1 SV=1;sp|Q9Y4Y9|LSM5_HUMAN U6 snRNA-associated Sm-like protein LSm5 OS=Homo sapiens OX=9606 GN=LSM5 PE=1 SV=3	TRUE	2	1	1	1	1	0	1	1	0	1	1	0	1	29.7	29.7	29.7	7.0202	64	64;91	0	3.528	By MS/MS		By MS/MS	0.83663	1.1597	33.996	2	0	Median	0.80126	1.0121	8.2802	2	0	Median	1.0395	0.94284	8.3912	2	0
P61081;M0QX69	P61081	3;1	3;1	3;1	NEDD8-conjugating enzyme Ubc12	UBE2M	sp|P61081|UBC12_HUMAN NEDD8-conjugating enzyme Ubc12 OS=Homo sapiens OX=9606 GN=UBE2M PE=1 SV=1	TRUE	2	3	3	3	2	3	1	2	3	1	2	3	1	15.3	15.3	15.3	20.9	183	183;69	0	5.6159	By MS/MS	By MS/MS	By matching	0.57457	1.1936	4.7533	5	0	Leave out requantified	0.6209	1.3003	34.471	5	0	Leave out requantified	1.0632	1.0497	33.954	5	0
P07711;Q5T8F0;Q5QP40;Q5NE16;P43235;O60911	P07711;Q5T8F0	5;3;1;1;1;1	5;3;1;1;1;1	5;3;1;1;1;1	Cathepsin L1;Cathepsin L1 heavy chain;Cathepsin L1 light chain	CTSL	sp|P07711|CATL1_HUMAN Cathepsin L1 OS=Homo sapiens OX=9606 GN=CTSL PE=1 SV=2;tr|Q5T8F0|Q5T8F0_HUMAN Cathepsin L1 OS=Homo sapiens OX=9606 GN=CTSL PE=1 SV=1	TRUE	6	5	5	5	5	3	3	5	3	3	5	3	3	17.1	17.1	17.1	37.564	333	333;225;258;218;329;334	0	36.517	By MS/MS	By MS/MS	By MS/MS	0.3863	0.66515	19.532	11	1	Leave out requantified	0.86328	1.3745	6.8684	11	1	Leave out requantified	1.9881	1.9188	22.019	11	1
E9PKY5;E9PEQ6;Q9UNP9	E9PKY5;E9PEQ6;Q9UNP9	3;3;3	2;2;2	2;2;2	Peptidyl-prolyl cis-trans isomerase;Peptidyl-prolyl cis-trans isomerase E	PPIE	tr|E9PKY5|E9PKY5_HUMAN Peptidyl-prolyl cis-trans isomerase (Fragment) OS=Homo sapiens OX=9606 GN=PPIE PE=1 SV=1;tr|E9PEQ6|E9PEQ6_HUMAN Peptidyl-prolyl cis-trans isomerase OS=Homo sapiens OX=9606 GN=PPIE PE=1 SV=1;sp|Q9UNP9|PPIE_HUMAN Peptidyl-prolyl cis-tr	TRUE	3	3	2	2	3	3	2	2	2	2	2	2	2	13.6	10.3	10.3	23.833	213	213;250;301	0	5.9163	By MS/MS	By MS/MS	By MS/MS	0.51859	0.89879	15.919	6	0	Leave out requantified	0.61716	0.97042	8.4992	6	0	Leave out requantified	1.1865	1.0559	13.853	6	0
B9A062;P13995;B8ZZU9	B9A062;P13995	3;3;1	3;3;1	3;3;1	Bifunctional methylenetetrahydrofolate dehydrogenase/cyclohydrolase, mitochondrial;NAD-dependent methylenetetrahydrofolate dehydrogenase;Methenyltetrahydrofolate cyclohydrolase	MTHFD2	tr|B9A062|B9A062_HUMAN Bifunctional methylenetetrahydrofolate dehydrogenase/cyclohydrolase, mitochondrial OS=Homo sapiens OX=9606 GN=MTHFD2 PE=1 SV=1;sp|P13995|MTDC_HUMAN Bifunctional methylenetetrahydrofolate dehydrogenase/cyclohydrolase, mitochondrial OS	TRUE	3	3	3	3	2	2	1	2	2	1	2	2	1	19.8	19.8	19.8	23.867	222	222;350;267	0	6.9672	By MS/MS	By MS/MS	By MS/MS	1.0149	2.0576	35.289	4	3	Median	0.79268	1.5626	8.0881	4	3	Median	0.71962	0.72512	32.512	4	3
P12270;Q5SWX9	P12270	20;1	20;1	20;1	Nucleoprotein TPR	TPR	sp|P12270|TPR_HUMAN Nucleoprotein TPR OS=Homo sapiens OX=9606 GN=TPR PE=1 SV=3	TRUE	2	20	20	20	13	15	15	13	15	15	13	15	15	11.6	11.6	11.6	267.29	2363	2363;150	0	113.36	By MS/MS	By MS/MS	By MS/MS	0.57601	0.89054	28.863	41	20	Leave out requantified	0.65833	0.94803	19.412	41	20	Leave out requantified	1.1508	1.0319	25.807	40	20
J3KR55;P35236;H7C4T8;H7C5I3;E9PE54;E7EUM0	J3KR55;P35236	7;7;3;3;2;2	7;7;3;3;2;2	7;7;3;3;2;2	Tyrosine-protein phosphatase non-receptor type 7	PTPN7	tr|J3KR55|J3KR55_HUMAN Tyrosine-protein phosphatase non-receptor type 7 (Fragment) OS=Homo sapiens OX=9606 GN=PTPN7 PE=1 SV=1;sp|P35236|PTN7_HUMAN Tyrosine-protein phosphatase non-receptor type 7 OS=Homo sapiens OX=9606 GN=PTPN7 PE=1 SV=3	TRUE	6	7	7	7	4	5	4	4	5	4	4	5	4	23.8	23.8	23.8	49.138	441	441;360;122;163;140;154	0	89.642	By MS/MS	By MS/MS	By MS/MS	0.51777	1.0994	6.4955	11	4	Leave out requantified	0.42557	0.8435	13.816	11	4	Leave out requantified	0.78539	0.80592	11.263	10	4
C9IY40;Q5T653	C9IY40;Q5T653	1;1	1;1	1;1	39S ribosomal protein L2, mitochondrial	MRPL2	tr|C9IY40|C9IY40_HUMAN 39S ribosomal protein L2, mitochondrial OS=Homo sapiens OX=9606 GN=MRPL2 PE=1 SV=1;sp|Q5T653|RM02_HUMAN 39S ribosomal protein L2, mitochondrial OS=Homo sapiens OX=9606 GN=MRPL2 PE=1 SV=2	TRUE	2	1	1	1	1	1	1	1	1	1	1	1	1	11.1	11.1	11.1	24.43	225	225;305	0	16.287	By MS/MS	By MS/MS	By MS/MS	0.54695	1.0431	25.577	3	3	Plateau	0.3811	0.72726	39.942	3	3	Plateau	0.95828	0.86218	30.671	3	3
C9IYL4;P29083	C9IYL4;P29083	1;1	1;1	1;1	General transcription factor IIE subunit 1	GTF2E1	tr|C9IYL4|C9IYL4_HUMAN General transcription factor IIE subunit 1 (Fragment) OS=Homo sapiens OX=9606 GN=GTF2E1 PE=1 SV=1;sp|P29083|T2EA_HUMAN General transcription factor IIE subunit 1 OS=Homo sapiens OX=9606 GN=GTF2E1 PE=1 SV=2	TRUE	2	1	1	1	0	0	1	0	0	1	0	0	1	10.1	10.1	10.1	14.437	129	129;439	0	3.6785			By MS/MS	NaN	NaN	NaN	0	0	Median	NaN	NaN	NaN	0	0	Median	NaN	NaN	NaN	0	0
F8WDK3;C9IZ04;Q9NY27	F8WDK3;C9IZ04;Q9NY27	1;1;1	1;1;1	1;1;1	Serine/threonine-protein phosphatase 4 regulatory subunit 2	PPP4R2	tr|F8WDK3|F8WDK3_HUMAN Serine/threonine-protein phosphatase 4 regulatory subunit 2 (Fragment) OS=Homo sapiens OX=9606 GN=PPP4R2 PE=1 SV=1;tr|C9IZ04|C9IZ04_HUMAN Serine/threonine-protein phosphatase 4 regulatory subunit 2 (Fragment) OS=Homo sapiens OX=9606	TRUE	3	1	1	1	0	1	0	0	1	0	0	1	0	29	29	29	7.3124	62	62;226;417	0.00035625	3.3534		By MS/MS		NaN	NaN	NaN	1	1	Median	NaN	NaN	NaN	1	1	Median	NaN	NaN	NaN	1	1
C9IZ83;H7C3L7;Q99543	C9IZ83;H7C3L7;Q99543	1;1;1	1;1;1	1;1;1	DnaJ homolog subfamily C member 2;DnaJ homolog subfamily C member 2, N-terminally processed	DNAJC2	tr|C9IZ83|C9IZ83_HUMAN DnaJ homolog subfamily C member 2 (Fragment) OS=Homo sapiens OX=9606 GN=DNAJC2 PE=1 SV=1;tr|H7C3L7|H7C3L7_HUMAN DnaJ homolog subfamily C member 2 (Fragment) OS=Homo sapiens OX=9606 GN=DNAJC2 PE=1 SV=1;sp|Q99543|DNJC2_HUMAN DnaJ homol	TRUE	3	1	1	1	1	1	1	1	1	1	1	1	1	6.9	6.9	6.9	22.414	188	188;243;621	0	8.5748	By MS/MS	By MS/MS	By MS/MS	0.47613	0.91981	3.042	3	1	Plateau	0.59952	1.0566	27.194	3	1	Median	1.1617	1.1067	20.298	3	1
C9IZG4;O60888	C9IZG4;O60888	2;2	2;2	2;2	Protein CutA	CUTA	tr|C9IZG4|C9IZG4_HUMAN Protein CutA OS=Homo sapiens OX=9606 GN=CUTA PE=1 SV=1;sp|O60888|CUTA_HUMAN Protein CutA OS=Homo sapiens OX=9606 GN=CUTA PE=1 SV=2	TRUE	2	2	2	2	1	2	1	1	2	1	1	2	1	19.3	19.3	19.3	14.401	135	135;179	0	9.5722	By MS/MS	By MS/MS	By MS/MS	0.41441	0.89398	15.73	3	0	Median	0.47197	0.85105	8.8208	3	0	Plateau	0.98728	0.96201	1.6916	3	0
H0YDJ4;H9KV85;C9J066;Q8N4C6	H0YDJ4;H9KV85;C9J066;Q8N4C6	2;2;2;2	1;1;1;1	1;1;1;1	Ninein	NIN	tr|H0YDJ4|H0YDJ4_HUMAN Ninein (Fragment) OS=Homo sapiens OX=9606 GN=NIN PE=1 SV=1;tr|H9KV85|H9KV85_HUMAN Ninein (Fragment) OS=Homo sapiens OX=9606 GN=NIN PE=1 SV=1;tr|C9J066|C9J066_HUMAN Ninein OS=Homo sapiens OX=9606 GN=NIN PE=1 SV=1;sp|Q8N4C6|NIN_HUMAN N	TRUE	4	2	1	1	2	2	1	1	1	1	1	1	1	1.6	1	1	179.44	1537	1537;1581;2046;2090	0.0071362	1.8992	By MS/MS	By MS/MS	By MS/MS	0.60154	0.68191	18.898	6	0	Linear	0.67476	0.84887	16.269	6	0	Median	1.0374	1.0006	8.0786	6	0
C9JRU6;C9J0B2;C9JUW4;C9J8R4;C9JVE2;Q96GG9	C9JRU6;C9J0B2;C9JUW4;C9J8R4;C9JVE2;Q96GG9	1;1;1;1;1;1	1;1;1;1;1;1	1;1;1;1;1;1	DCN1-like protein;DCN1-like protein 1	DCUN1D1	tr|C9JRU6|C9JRU6_HUMAN DCN1-like protein (Fragment) OS=Homo sapiens OX=9606 GN=DCUN1D1 PE=1 SV=1;tr|C9J0B2|C9J0B2_HUMAN DCN1-like protein (Fragment) OS=Homo sapiens OX=9606 GN=DCUN1D1 PE=1 SV=1;tr|C9JUW4|C9JUW4_HUMAN DCN1-like protein (Fragment) OS=Homo sa	TRUE	6	1	1	1	1	0	1	1	0	1	1	0	1	22.7	22.7	22.7	8.7797	75	75;92;98;128;244;259	0	7.1515	By MS/MS		By MS/MS	0.6516	1.2334	18.019	2	1	Median	0.53427	0.98866	38.219	2	1	Median	NaN	NaN	NaN	1	1
C9J0K6;P30626;B4DHQ6	C9J0K6;P30626	3;3;1	3;3;1	3;3;1	Sorcin	SRI	tr|C9J0K6|C9J0K6_HUMAN Sorcin OS=Homo sapiens OX=9606 GN=SRI PE=1 SV=1;sp|P30626|SORCN_HUMAN Sorcin OS=Homo sapiens OX=9606 GN=SRI PE=1 SV=1	TRUE	3	3	3	3	3	2	2	3	2	2	3	2	2	16.8	16.8	16.8	17.605	155	155;198;158	0	3.6479	By MS/MS	By MS/MS	By MS/MS	0.5282	0.9492	8.1882	3	1	Plateau	0.47829	0.79729	20.07	3	1	Plateau	1.1873	1.0914	25.47	3	1
D6RBD7;C9J1V9;O43324;H0YAL7;D6RCQ0	D6RBD7;C9J1V9;O43324;H0YAL7	3;3;3;2;1	3;3;3;2;1	3;3;3;2;1	Eukaryotic translation elongation factor 1 epsilon-1	EEF1E1;EEF1E1-BLOC1S5	tr|D6RBD7|D6RBD7_HUMAN Eukaryotic translation elongation factor 1 epsilon-1 OS=Homo sapiens OX=9606 GN=EEF1E1 PE=4 SV=1;tr|C9J1V9|C9J1V9_HUMAN EEF1E1-BLOC1S5 readthrough (NMD candidate) OS=Homo sapiens OX=9606 GN=EEF1E1-BLOC1S5 PE=4 SV=2;sp|O43324|MCA3_HUM	TRUE	5	3	3	3	3	1	1	3	1	1	3	1	1	30.7	30.7	30.7	16.686	150	150;151;174;136;94	0	16.537	By MS/MS	By MS/MS	By MS/MS	0.86612	1.2506	12.785	5	1	Leave out requantified	0.7313	1.0236	11.881	5	1	Leave out requantified	0.92216	0.81682	8.3337	5	1
Q9UBR2	Q9UBR2	5	5	5	Cathepsin Z	CTSZ	sp|Q9UBR2|CATZ_HUMAN Cathepsin Z OS=Homo sapiens OX=9606 GN=CTSZ PE=1 SV=1	TRUE	1	5	5	5	4	4	5	4	4	5	4	4	5	17.2	17.2	17.2	33.868	303	303	0	28.413	By MS/MS	By MS/MS	By MS/MS	0.43224	0.90533	5.6539	10	2	Leave out requantified	0.34477	0.71667	8.9383	10	2	Leave out requantified	0.80482	0.79271	5.7845	10	2
C9J2Y4;E7EQY1;Q96C01	C9J2Y4;E7EQY1;Q96C01	1;1;1	1;1;1	1;1;1	Protein FAM136A	FAM136A	tr|C9J2Y4|C9J2Y4_HUMAN Protein FAM136A OS=Homo sapiens OX=9606 GN=FAM136A PE=1 SV=1;tr|E7EQY1|E7EQY1_HUMAN Protein FAM136A OS=Homo sapiens OX=9606 GN=FAM136A PE=1 SV=1;sp|Q96C01|F136A_HUMAN Protein FAM136A OS=Homo sapiens OX=9606 GN=FAM136A PE=1 SV=1	TRUE	3	1	1	1	1	1	1	1	1	1	1	1	1	9.5	9.5	9.5	11.881	105	105;245;138	0.0016584	2.5582	By MS/MS	By MS/MS	By MS/MS	0.52327	0.83535	17.531	3	3	Median	0.50481	0.74015	21.202	3	3	Plateau	1.2316	1.0204	6.7282	3	3
G3V1C3;Q9BZZ5;H0YER7;E9PQK6	G3V1C3;Q9BZZ5	11;11;4;3	11;11;4;3	11;11;4;3	Apoptosis inhibitor 5	API5	tr|G3V1C3|G3V1C3_HUMAN Apoptosis inhibitor 5 OS=Homo sapiens OX=9606 GN=API5 PE=1 SV=1;sp|Q9BZZ5|API5_HUMAN Apoptosis inhibitor 5 OS=Homo sapiens OX=9606 GN=API5 PE=1 SV=3	TRUE	4	11	11	11	10	10	9	10	10	9	10	10	9	22.7	22.7	22.7	57.56	510	510;524;294;123	0	55.349	By MS/MS	By MS/MS	By MS/MS	0.55857	0.94788	20.431	30	4	Leave out requantified	0.63882	0.92395	17.059	30	4	Leave out requantified	1.103	1.0062	13.588	30	4
C9J3F6;Q92609	C9J3F6;Q92609	1;1	1;1	1;1	TBC1 domain family member 5	TBC1D5	tr|C9J3F6|C9J3F6_HUMAN TBC1 domain family member 5 OS=Homo sapiens OX=9606 GN=TBC1D5 PE=1 SV=1;sp|Q92609|TBCD5_HUMAN TBC1 domain family member 5 OS=Homo sapiens OX=9606 GN=TBC1D5 PE=1 SV=1	TRUE	2	1	1	1	0	1	0	0	1	0	0	1	0	2.5	2.5	2.5	67.534	593	593;795	0.0013454	2.6938		By MS/MS		NaN	NaN	NaN	1	1	Median	NaN	NaN	NaN	1	1	Median	NaN	NaN	NaN	1	1
C9J4M8;J3KQK8	C9J4M8;J3KQK8	1;1	1;1	1;1		DPP10	tr|C9J4M8|C9J4M8_HUMAN Inactive dipeptidyl peptidase 10 (Fragment) OS=Homo sapiens OX=9606 GN=DPP10 PE=1 SV=1;tr|J3KQK8|J3KQK8_HUMAN Inactive dipeptidyl peptidase 10 (Fragment) OS=Homo sapiens OX=9606 GN=DPP10 PE=1 SV=1	TRUE	2	1	1	1	0	1	0	0	1	0	0	1	0	30	30	30	6.9587	60	60;97	0.0096823	1.736		By MS/MS		NaN	NaN	NaN	0	0	Median	NaN	NaN	NaN	0	0	Median	NaN	NaN	NaN	0	0
C9J4Z3;P61513	C9J4Z3;P61513	1;1	1;1	1;1	60S ribosomal protein L37a	RPL37A	tr|C9J4Z3|C9J4Z3_HUMAN 60S ribosomal protein L37a OS=Homo sapiens OX=9606 GN=RPL37A PE=1 SV=1;sp|P61513|RL37A_HUMAN 60S ribosomal protein L37a OS=Homo sapiens OX=9606 GN=RPL37A PE=1 SV=2	TRUE	2	1	1	1	1	1	1	1	1	1	1	1	1	26.5	26.5	26.5	7.624	68	68;92	0	46.995	By MS/MS	By MS/MS	By MS/MS	0.66102	0.96851	12.893	3	0	Plateau	0.76259	1.1253	6.1148	3	0	Plateau	1.0768	1.0089	7.6248	3	0
C9JVD8;C9J578;C9J9E4;C9JR83;E9PD53;Q9NTJ3	C9JVD8;C9J578;C9J9E4;C9JR83;E9PD53;Q9NTJ3	1;1;1;1;1;1	1;1;1;1;1;1	1;1;1;1;1;1	Structural maintenance of chromosomes protein;Structural maintenance of chromosomes protein 4	SMC4	tr|C9JVD8|C9JVD8_HUMAN Structural maintenance of chromosomes protein 4 (Fragment) OS=Homo sapiens OX=9606 GN=SMC4 PE=1 SV=1;tr|C9J578|C9J578_HUMAN Structural maintenance of chromosomes protein 4 (Fragment) OS=Homo sapiens OX=9606 GN=SMC4 PE=1 SV=1;tr|C9J9E	TRUE	6	1	1	1	1	1	0	1	1	0	1	1	0	17.6	17.6	17.6	13.741	119	119;139;157;423;1263;1288	0.0010384	2.9869	By MS/MS	By MS/MS		0.49955	0.86675	9.0056	2	2	Median	NaN	NaN	NaN	1	1	Median	NaN	NaN	NaN	1	1
O75475;H3BPQ6;M0R0J3;A0A024R216;Q9Y3E1	O75475	6;1;1;1;1	5;0;0;0;0	5;0;0;0;0	PC4 and SFRS1-interacting protein	PSIP1	sp|O75475|PSIP1_HUMAN PC4 and SFRS1-interacting protein OS=Homo sapiens OX=9606 GN=PSIP1 PE=1 SV=1	TRUE	5	6	5	5	4	5	5	4	4	4	4	4	4	14.3	12.8	12.8	60.103	530	530;44;97;203;203	0	11.796	By MS/MS	By MS/MS	By MS/MS	0.55698	0.93099	12.171	13	7	Leave out requantified	0.53756	0.7317	26.574	13	7	Leave out requantified	1.0679	0.99287	19.63	13	7
C9JJV6;C9JZL8;C9J5M0;C9JC07;Q96S97	C9JJV6;C9JZL8;C9J5M0;C9JC07;Q96S97	1;1;1;1;1	1;1;1;1;1	1;1;1;1;1	Myeloid-associated differentiation marker	MYADM	tr|C9JJV6|C9JJV6_HUMAN Myeloid-associated differentiation marker (Fragment) OS=Homo sapiens OX=9606 GN=MYADM PE=1 SV=8;tr|C9JZL8|C9JZL8_HUMAN Myeloid-associated differentiation marker (Fragment) OS=Homo sapiens OX=9606 GN=MYADM PE=1 SV=1;tr|C9J5M0|C9J5M0_H	TRUE	5	1	1	1	1	1	1	1	1	1	1	1	1	15.8	15.8	15.8	15.864	146	146;188;242;259;322	0	22.129	By MS/MS	By MS/MS	By MS/MS	0.38953	0.82085	5.1507	3	3	Median	0.33498	0.7557	13.752	3	3	Plateau	0.85411	0.88198	11.015	3	3
H7BXQ8;C9J5N7;Q8N2F6	H7BXQ8;C9J5N7;Q8N2F6	1;1;1	1;1;1	1;1;1	Armadillo repeat-containing protein 10	ARMC10	tr|H7BXQ8|H7BXQ8_HUMAN Armadillo repeat-containing protein 10 OS=Homo sapiens OX=9606 GN=ARMC10 PE=1 SV=1;tr|C9J5N7|C9J5N7_HUMAN Armadillo repeat-containing protein 10 (Fragment) OS=Homo sapiens OX=9606 GN=ARMC10 PE=1 SV=1;sp|Q8N2F6|ARM10_HUMAN Armadillo r	TRUE	3	1	1	1	1	1	1	1	1	1	1	1	1	8.3	8.3	8.3	20.87	193	193;233;343	0	9.1415	By MS/MS	By MS/MS	By MS/MS	0.38019	0.87517	13.974	3	2	Plateau	0.31756	0.96787	34.041	3	2	Plateau	0.87519	1.0976	18.862	3	2
F8WF03;F2Z2I0;F2Z2W5;C9J647	F8WF03;F2Z2I0;F2Z2W5;C9J647	1;1;1;1	1;1;1;1	1;1;1;1		SMPD4	tr|F8WF03|F8WF03_HUMAN Sphingomyelin phosphodiesterase 4 OS=Homo sapiens OX=9606 GN=SMPD4 PE=1 SV=1;tr|F2Z2I0|F2Z2I0_HUMAN Sphingomyelin phosphodiesterase 4 OS=Homo sapiens OX=9606 GN=SMPD4 PE=1 SV=1;tr|F2Z2W5|F2Z2W5_HUMAN Sphingomyelin phosphodiesterase 4	TRUE	4	1	1	1	1	1	1	1	1	1	1	1	1	32	32	32	5.6264	50	50;56;57;135	0	9.3842	By MS/MS	By MS/MS	By MS/MS	0.99482	1.4129	8.9938	4	3	Median	0.8884	1.1698	18.297	4	3	Median	0.93634	0.83069	5.6302	4	3
C9J6A7;Q96AT9;Q2QD12	C9J6A7;Q96AT9;Q2QD12	1;1;1	1;1;1	1;1;1	Ribulose-phosphate 3-epimerase;Ribulose-phosphate 3-epimerase-like protein 1	RPE;RPEL1	tr|C9J6A7|C9J6A7_HUMAN Ribulose-phosphate 3-epimerase (Fragment) OS=Homo sapiens OX=9606 GN=RPE PE=1 SV=1;sp|Q96AT9|RPE_HUMAN Ribulose-phosphate 3-epimerase OS=Homo sapiens OX=9606 GN=RPE PE=1 SV=1;sp|Q2QD12|RPEL1_HUMAN Ribulose-phosphate 3-epimerase-like	TRUE	3	1	1	1	1	1	1	1	1	1	1	1	1	4.4	4.4	4.4	17.414	159	159;228;228	0.0091158	1.7676	By MS/MS	By MS/MS	By MS/MS	0.40398	0.85404	8.6209	4	2	Median	0.4706	0.9562	13.276	4	2	Median	1.0579	0.98408	14.007	4	2
C9J6C5;Q9BYG3	C9J6C5;Q9BYG3	1;1	1;1	1;1	MKI67 FHA domain-interacting nucleolar phosphoprotein	NIFK	tr|C9J6C5|C9J6C5_HUMAN MKI67 FHA domain-interacting nucleolar phosphoprotein (Fragment) OS=Homo sapiens OX=9606 GN=NIFK PE=1 SV=1;sp|Q9BYG3|MK67I_HUMAN MKI67 FHA domain-interacting nucleolar phosphoprotein OS=Homo sapiens OX=9606 GN=NIFK PE=1 SV=1	TRUE	2	1	1	1	1	1	1	1	1	1	1	1	1	8.4	8.4	8.4	19.553	166	166;293	0	9.225	By MS/MS	By MS/MS	By MS/MS	0.462	0.92188	24.145	4	2	Median	0.79253	1.6305	17.125	4	2	Median	1.9768	1.9431	14.539	4	2
C9J719;C9JJ78;Q15125	C9J719;C9JJ78;Q15125	2;2;2	2;2;2	2;2;2	3-beta-hydroxysteroid-Delta(8),Delta(7)-isomerase	EBP	tr|C9J719|C9J719_HUMAN 3-beta-hydroxysteroid-Delta(8),Delta(7)-isomerase (Fragment) OS=Homo sapiens OX=9606 GN=EBP PE=1 SV=8;tr|C9JJ78|C9JJ78_HUMAN 3-beta-hydroxysteroid-Delta(8),Delta(7)-isomerase (Fragment) OS=Homo sapiens OX=9606 GN=EBP PE=1 SV=1;sp|Q15	TRUE	3	2	2	2	2	1	1	2	1	1	2	1	1	17.9	17.9	17.9	16.608	145	145;160;230	0	4.9912	By MS/MS	By MS/MS	By MS/MS	0.5203	1.0366	0.44631	4	0	Leave out requantified	0.43254	0.83999	13.384	4	0	Leave out requantified	0.85319	0.85807	9.4445	4	0
C9J7B1;C9K068;H7C333;O75323	C9J7B1;C9K068;H7C333;O75323	1;1;1;1	1;1;1;1	1;1;1;1	Protein NipSnap homolog 2	GBAS	tr|C9J7B1|C9J7B1_HUMAN Protein NipSnap homolog 2 (Fragment) OS=Homo sapiens OX=9606 GN=NIPSNAP2 PE=1 SV=1;tr|C9K068|C9K068_HUMAN Protein NipSnap homolog 2 (Fragment) OS=Homo sapiens OX=9606 GN=NIPSNAP2 PE=1 SV=8;tr|H7C333|H7C333_HUMAN Protein NipSnap homol	TRUE	4	1	1	1	1	1	1	1	1	1	1	1	1	13.8	13.8	13.8	7.939	65	65;80;114;286	0.004156	2.1621	By MS/MS	By MS/MS	By MS/MS	0.47183	0.90057	9.965	3	2	Plateau	0.3451	0.76094	9.6422	3	2	Median	0.83166	0.75676	14.166	3	2
Q15758;M0QXM4;M0QX44	Q15758;M0QXM4	3;2;1	3;2;1	3;2;1	Neutral amino acid transporter B(0);Amino acid transporter	SLC1A5	sp|Q15758|AAAT_HUMAN Neutral amino acid transporter B(0) OS=Homo sapiens OX=9606 GN=SLC1A5 PE=1 SV=2;tr|M0QXM4|M0QXM4_HUMAN Amino acid transporter OS=Homo sapiens OX=9606 GN=SLC1A5 PE=1 SV=1	TRUE	3	3	3	3	3	2	3	3	2	3	3	2	3	8.1	8.1	8.1	56.598	541	541;365;258	0	21.519	By MS/MS	By MS/MS	By MS/MS	0.49681	1.0518	8.0603	9	1	Leave out requantified	0.73907	1.5206	3.3097	9	1	Leave out requantified	1.6483	1.5279	6.4512	9	1
C9J8T6;Q14061	C9J8T6;Q14061	1;1	1;1	1;1	Cytochrome c oxidase copper chaperone	COX17	tr|C9J8T6|C9J8T6_HUMAN Cytochrome c oxidase copper chaperone OS=Homo sapiens OX=9606 GN=COX17 PE=1 SV=1;sp|Q14061|COX17_HUMAN Cytochrome c oxidase copper chaperone OS=Homo sapiens OX=9606 GN=COX17 PE=1 SV=2	TRUE	2	1	1	1	1	1	1	1	1	1	1	1	1	16.3	16.3	16.3	10.853	98	98;63	0	14.982	By MS/MS	By MS/MS	By MS/MS	0.802	1.1079	16.402	3	0	Plateau	0.76348	0.96265	3.7705	3	0	Plateau	1.0176	0.92316	10.477	3	0
P46060;H0Y4Q3;B0QYT6;B0QYT5;B0QYT4	P46060	9;3;1;1;1	9;3;1;1;1	9;3;1;1;1	Ran GTPase-activating protein 1	RANGAP1	sp|P46060|RAGP1_HUMAN Ran GTPase-activating protein 1 OS=Homo sapiens OX=9606 GN=RANGAP1 PE=1 SV=1	TRUE	5	9	9	9	6	7	7	6	7	7	6	7	7	23.2	23.2	23.2	63.541	587	587;253;37;100;133	0	64.694	By MS/MS	By MS/MS	By MS/MS	0.5206	0.89116	23.23	23	13	Leave out requantified	0.52773	0.9376	23.173	23	13	Leave out requantified	1.1909	1.1445	34.918	23	13
C9J9W7;Q03701	C9J9W7;Q03701	1;1	1;1	1;1	CCAAT/enhancer-binding protein zeta	CEBPZ	tr|C9J9W7|C9J9W7_HUMAN CCAAT/enhancer-binding protein zeta (Fragment) OS=Homo sapiens OX=9606 GN=CEBPZ PE=1 SV=1;sp|Q03701|CEBPZ_HUMAN CCAAT/enhancer-binding protein zeta OS=Homo sapiens OX=9606 GN=CEBPZ PE=1 SV=3	TRUE	2	1	1	1	0	1	0	0	1	0	0	1	0	15.8	15.8	15.8	16.714	146	146;1054	0	7.6156		By MS/MS		NaN	NaN	NaN	1	1	Median	NaN	NaN	NaN	1	1	Median	NaN	NaN	NaN	1	1
C9JA24;C9JXP0;Q9GZY6	C9JA24;C9JXP0;Q9GZY6	1;1;1	1;1;1	1;1;1	Linker for activation of T-cells family member 2	LAT2	tr|C9JA24|C9JA24_HUMAN Linker for activation of T-cells family member 2 (Fragment) OS=Homo sapiens OX=9606 GN=LAT2 PE=1 SV=1;tr|C9JXP0|C9JXP0_HUMAN Linker for activation of T-cells family member 2 (Fragment) OS=Homo sapiens OX=9606 GN=LAT2 PE=1 SV=1;sp|Q9G	TRUE	3	1	1	1	1	1	1	1	1	1	1	1	1	15	15	15	11.068	100	100;100;243	0	5.9562	By MS/MS	By MS/MS	By MS/MS	0.79096	1.6098	16.164	4	2	Median	0.86051	1.6751	26.013	4	2	Median	1.1766	1.1724	26.606	4	2
C9JA28;Q9UNL2	C9JA28;Q9UNL2	1;1	1;1	1;1	Translocon-associated protein subunit gamma	SSR3	tr|C9JA28|C9JA28_HUMAN Translocon-associated protein subunit gamma OS=Homo sapiens OX=9606 GN=SSR3 PE=1 SV=1;sp|Q9UNL2|SSRG_HUMAN Translocon-associated protein subunit gamma OS=Homo sapiens OX=9606 GN=SSR3 PE=1 SV=1	TRUE	2	1	1	1	1	1	1	1	1	1	1	1	1	8	8	8	20.161	174	174;185	0	33.91	By MS/MS	By MS/MS	By MS/MS	0.47867	1.036	26.067	3	0	Median	0.77515	1.2304	16.07	3	0	Plateau	1.0808	1.1298	36.411	3	0
C9JA93;Q8TC07	C9JA93;Q8TC07	1;1	1;1	1;1	TBC1 domain family member 15	TBC1D15	tr|C9JA93|C9JA93_HUMAN TBC1 domain family member 15 (Fragment) OS=Homo sapiens OX=9606 GN=TBC1D15 PE=1 SV=1;sp|Q8TC07|TBC15_HUMAN TBC1 domain family member 15 OS=Homo sapiens OX=9606 GN=TBC1D15 PE=1 SV=2	TRUE	2	1	1	1	1	1	1	1	1	1	1	1	1	5	5	5	32.136	278	278;691	0.00036036	3.4766	By MS/MS	By MS/MS	By MS/MS	0.3624	0.72987	36.96	2	2	Median	0.41253	0.85272	0.87009	2	2	Median	1.1383	1.1528	37.336	2	2
C9JAF7;O95721	C9JAF7;O95721	1;1	1;1	1;1	Synaptosomal-associated protein;Synaptosomal-associated protein 29	SNAP29	tr|C9JAF7|C9JAF7_HUMAN Synaptosomal-associated protein 29 (Fragment) OS=Homo sapiens OX=9606 GN=SNAP29 PE=1 SV=1;sp|O95721|SNP29_HUMAN Synaptosomal-associated protein 29 OS=Homo sapiens OX=9606 GN=SNAP29 PE=1 SV=1	TRUE	2	1	1	1	1	0	1	1	0	1	1	0	1	6.9	6.9	6.9	17.963	160	160;258	0	5.0334	By MS/MS		By MS/MS	0.71472	1.0563	5.921	2	0	Median	0.64631	0.84117	14.825	2	0	Median	0.88027	0.77658	0.21306	2	0
O75663	O75663	3	3	3	TIP41-like protein	TIPRL	sp|O75663|TIPRL_HUMAN TIP41-like protein OS=Homo sapiens OX=9606 GN=TIPRL PE=1 SV=2	TRUE	1	3	3	3	2	2	2	2	2	2	2	2	2	11.4	11.4	11.4	31.444	272	272	0	4.7226	By MS/MS	By MS/MS	By MS/MS	0.65959	1.1533	26.461	6	1	Leave out requantified	0.66668	1.0937	12.509	6	1	Leave out requantified	1.0021	0.93127	17.712	6	1
C9JAW5;C9JNU6;Q9Y241	C9JAW5;C9JNU6;Q9Y241	1;1;1	1;1;1	1;1;1	HIG1 domain family member 1A, mitochondrial	HIGD1A	tr|C9JAW5|C9JAW5_HUMAN Uncharacterized protein OS=Homo sapiens OX=9606 PE=4 SV=1;tr|C9JNU6|C9JNU6_HUMAN HIG1 domain family member 1A, mitochondrial OS=Homo sapiens OX=9606 GN=HIGD1A PE=4 SV=1;sp|Q9Y241|HIG1A_HUMAN HIG1 domain family member 1A, mitochondria	TRUE	3	1	1	1	1	1	1	1	1	1	1	1	1	21.7	21.7	21.7	8.8131	83	83;96;93	0	27.641	By MS/MS	By MS/MS	By MS/MS	0.87631	1.2487	6.8598	3	0	Median	0.8312	1.278	9.7701	3	0	Plateau	1.1039	1.0359	15.879	3	0
C9JCB7;C9JE50;Q8NBZ7	C9JCB7;C9JE50;Q8NBZ7	1;1;1	1;1;1	1;1;1	UDP-glucuronic acid decarboxylase 1	UXS1	tr|C9JCB7|C9JCB7_HUMAN UDP-glucuronic acid decarboxylase 1 (Fragment) OS=Homo sapiens OX=9606 GN=UXS1 PE=1 SV=1;tr|C9JE50|C9JE50_HUMAN UDP-glucuronic acid decarboxylase 1 (Fragment) OS=Homo sapiens OX=9606 GN=UXS1 PE=1 SV=8;sp|Q8NBZ7|UXS1_HUMAN UDP-glucuro	TRUE	3	1	1	1	1	0	1	1	0	1	1	0	1	18.7	18.7	18.7	14.991	134	134;170;420	0	5.0195	By MS/MS		By MS/MS	0.4599	0.90636	2.6002	2	1	Median	0.63777	1.2257	0.90348	2	1	Median	1.2589	1.2208	16.342	2	1
Q16643;D6R9W4;D6R9Q9;D6RFI1;D6RCR4	Q16643;D6R9W4	11;7;5;4;2	11;7;5;4;2	11;7;5;4;2	Drebrin	DBN1	sp|Q16643|DREB_HUMAN Drebrin OS=Homo sapiens OX=9606 GN=DBN1 PE=1 SV=4;tr|D6R9W4|D6R9W4_HUMAN Drebrin (Fragment) OS=Homo sapiens OX=9606 GN=DBN1 PE=1 SV=1	TRUE	5	11	11	11	10	9	7	10	9	7	10	9	7	18.3	18.3	18.3	71.428	649	649;317;391;124;93	0	93.397	By MS/MS	By MS/MS	By MS/MS	0.80267	1.3496	22.362	32	21	Leave out requantified	0.42164	0.75483	38.116	31	20	Leave out requantified	0.53593	0.55015	17.775	31	20
Q8TCJ2	Q8TCJ2	8	8	8	Dolichyl-diphosphooligosaccharide--protein glycosyltransferase subunit STT3B	STT3B	sp|Q8TCJ2|STT3B_HUMAN Dolichyl-diphosphooligosaccharide--protein glycosyltransferase subunit STT3B OS=Homo sapiens OX=9606 GN=STT3B PE=1 SV=1	TRUE	1	8	8	8	7	6	4	7	6	4	7	6	4	9.8	9.8	9.8	93.673	826	826	0	20.016	By MS/MS	By MS/MS	By MS/MS	0.51614	0.9337	14.658	18	6	Leave out requantified	0.60202	1.0695	14.566	18	6	Leave out requantified	1.3009	1.2003	19.196	18	6
P49593;A8MX49;B5MCT7;C9J2F3;C9JL74	P49593;A8MX49;B5MCT7	6;5;3;2;1	6;5;3;2;1	6;5;3;2;1	Protein phosphatase 1F	PPM1F	sp|P49593|PPM1F_HUMAN Protein phosphatase 1F OS=Homo sapiens OX=9606 GN=PPM1F PE=1 SV=3;tr|A8MX49|A8MX49_HUMAN Protein phosphatase 1F (PP2C domain containing), isoform CRA_b OS=Homo sapiens OX=9606 GN=PPM1F PE=1 SV=2;tr|B5MCT7|B5MCT7_HUMAN Protein phosphat	TRUE	5	6	6	6	6	3	2	6	3	2	6	3	2	20.5	20.5	20.5	49.83	454	454;361;286;89;82	0	15.789	By MS/MS	By MS/MS	By MS/MS	0.57233	1.0568	14.746	11	5	Leave out requantified	0.57516	1.0497	19.135	11	5	Leave out requantified	1.2689	1.1629	12.701	11	5
O00442	O00442	5	5	5	RNA 3-terminal phosphate cyclase	RTCA	sp|O00442|RTCA_HUMAN RNA 3-terminal phosphate cyclase OS=Homo sapiens OX=9606 GN=RTCA PE=1 SV=1	TRUE	1	5	5	5	4	5	3	4	5	3	4	5	3	17.8	17.8	17.8	39.336	366	366	0	14.201	By MS/MS	By MS/MS	By MS/MS	0.63998	0.98603	9.3958	13	5	Leave out requantified	0.73459	1.039	12.46	12	4	Leave out requantified	1.0712	0.95995	6.2152	12	4
O96000;H3BPJ9;H3BV16	O96000;H3BPJ9;H3BV16	3;3;2	3;3;2	3;3;2	NADH dehydrogenase [ubiquinone] 1 beta subcomplex subunit 10	NDUFB10	sp|O96000|NDUBA_HUMAN NADH dehydrogenase [ubiquinone] 1 beta subcomplex subunit 10 OS=Homo sapiens OX=9606 GN=NDUFB10 PE=1 SV=3;tr|H3BPJ9|H3BPJ9_HUMAN NADH dehydrogenase [ubiquinone] 1 beta subcomplex subunit 10 OS=Homo sapiens OX=9606 GN=NDUFB10 PE=1 SV=1	TRUE	3	3	3	3	3	2	1	3	2	1	3	2	1	21.5	21.5	21.5	20.776	172	172;161;142	0	12.083	By MS/MS	By MS/MS	By MS/MS	0.49914	0.85537	28.375	11	8	Leave out requantified	0.39954	0.74528	23.988	11	8	Leave out requantified	0.90122	0.89403	22.439	11	8
H7BZJ8;C9JEV0;P25311	H7BZJ8;C9JEV0;P25311	1;1;1	1;1;1	1;1;1	Zinc-alpha-2-glycoprotein	AZGP1	tr|H7BZJ8|H7BZJ8_HUMAN Zinc-alpha-2-glycoprotein (Fragment) OS=Homo sapiens OX=9606 GN=AZGP1 PE=1 SV=1;tr|C9JEV0|C9JEV0_HUMAN Zinc-alpha-2-glycoprotein OS=Homo sapiens OX=9606 GN=AZGP1 PE=1 SV=1;sp|P25311|ZA2G_HUMAN Zinc-alpha-2-glycoprotein OS=Homo sapien	TRUE	3	1	1	1	0	1	0	0	1	0	0	1	0	24.7	24.7	24.7	9.5977	85	85;227;298	0.0010442	3.0419		By MS/MS		NaN	NaN	NaN	1	1	Median	NaN	NaN	NaN	1	1	Median	NaN	NaN	NaN	1	1
P33993;C9J8M6	P33993	21;3	21;3	21;3	DNA replication licensing factor MCM7	MCM7	sp|P33993|MCM7_HUMAN DNA replication licensing factor MCM7 OS=Homo sapiens OX=9606 GN=MCM7 PE=1 SV=4	TRUE	2	21	21	21	14	19	15	14	19	15	14	19	15	36	36	36	81.307	719	719;183	0	71.699	By MS/MS	By MS/MS	By MS/MS	0.41063	0.84528	37.443	54	33	Leave out requantified	0.30961	0.60385	39.654	53	32	Leave out requantified	0.72672	0.71852	30.575	53	32
O95639;C9JEV9;B7Z7B0	O95639;C9JEV9;B7Z7B0	2;2;1	2;2;1	2;2;1	Cleavage and polyadenylation specificity factor subunit 4	CPSF4	sp|O95639|CPSF4_HUMAN Cleavage and polyadenylation specificity factor subunit 4 OS=Homo sapiens OX=9606 GN=CPSF4 PE=1 SV=1;tr|C9JEV9|C9JEV9_HUMAN Cleavage and polyadenylation-specificity factor subunit 4 OS=Homo sapiens OX=9606 GN=CPSF4 PE=1 SV=1;tr|B7Z7B0	TRUE	3	2	2	2	1	0	1	1	0	1	1	0	1	7.8	7.8	7.8	30.255	269	269;211;191	0.0010249	2.8536	By MS/MS		By MS/MS	NaN	NaN	NaN	1	1	Median	NaN	NaN	NaN	1	1	Median	NaN	NaN	NaN	1	1
P30050	P30050	7	7	7	60S ribosomal protein L12	RPL12	sp|P30050|RL12_HUMAN 60S ribosomal protein L12 OS=Homo sapiens OX=9606 GN=RPL12 PE=1 SV=1	TRUE	1	7	7	7	6	7	5	6	7	5	6	7	5	54.5	54.5	54.5	17.818	165	165	0	92.054	By MS/MS	By MS/MS	By MS/MS	0.58118	0.97805	17.363	18	5	Leave out requantified	0.76001	1.0037	33.684	18	5	Leave out requantified	1.2281	1.1435	10.761	18	5
P09543;K7ERC4;K7EN66;C9K0L8;K7ERZ0	P09543	12;4;3;3;3	12;4;3;3;3	12;4;3;3;3	2,3-cyclic-nucleotide 3-phosphodiesterase	CNP	sp|P09543|CN37_HUMAN 2,3-cyclic-nucleotide 3-phosphodiesterase OS=Homo sapiens OX=9606 GN=CNP PE=1 SV=2	TRUE	5	12	12	12	11	10	12	11	10	12	11	10	12	26.8	26.8	26.8	47.578	421	421;164;120;144;153	0	64.747	By MS/MS	By MS/MS	By MS/MS	0.60467	0.98803	23.608	32	8	Leave out requantified	1.0672	1.5236	23.521	33	8	Leave out requantified	1.6172	1.4429	29.051	33	8
J3KR44;Q96FW1;F5GYN4;F5H6Q1;F5GYJ8;F5H3F0	J3KR44;Q96FW1;F5GYN4;F5H6Q1;F5GYJ8;F5H3F0	9;9;8;8;7;5	9;9;8;8;7;5	9;9;8;8;7;5	Ubiquitin thioesterase OTUB1	OTUB1	tr|J3KR44|J3KR44_HUMAN Ubiquitin thioesterase OS=Homo sapiens OX=9606 GN=OTUB1 PE=1 SV=2;sp|Q96FW1|OTUB1_HUMAN Ubiquitin thioesterase OTUB1 OS=Homo sapiens OX=9606 GN=OTUB1 PE=1 SV=2;tr|F5GYN4|F5GYN4_HUMAN Ubiquitin thioesterase OTUB1 OS=Homo sapiens OX=96	TRUE	6	9	9	9	9	9	8	9	9	8	9	9	8	39.3	39.3	39.3	31.44	272	272;271;241;280;286;170	0	69.142	By MS/MS	By MS/MS	By MS/MS	0.64741	1.1499	5.2763	30	4	Leave out requantified	0.65679	1.0624	10.082	30	4	Leave out requantified	0.96881	0.92714	14.628	30	4
H3BPE7;P35637	H3BPE7;P35637	7;7	7;7	5;5	RNA-binding protein FUS	FUS	tr|H3BPE7|H3BPE7_HUMAN RNA-binding protein FUS OS=Homo sapiens OX=9606 GN=FUS PE=1 SV=1;sp|P35637|FUS_HUMAN RNA-binding protein FUS OS=Homo sapiens OX=9606 GN=FUS PE=1 SV=1	TRUE	2	7	7	5	6	7	7	6	7	7	4	5	5	13.9	13.9	13.9	53.496	527	527;526	0	65.604	By MS/MS	By MS/MS	By MS/MS	0.49084	0.85309	11.933	31	11	Leave out requantified	0.67874	0.92755	2.74	31	11	Leave out requantified	1.0963	1.0468	16.572	31	11
F2Z2K8;C9JIK8;C9JQ72;Q9Y4P1;H0Y2Y0	F2Z2K8;C9JIK8;C9JQ72;Q9Y4P1;H0Y2Y0	2;2;2;2;1	2;2;2;2;1	2;2;2;2;1	Cysteine protease ATG4B	ATG4B	tr|F2Z2K8|F2Z2K8_HUMAN Cysteine protease ATG4B OS=Homo sapiens OX=9606 GN=ATG4B PE=1 SV=1;tr|C9JIK8|C9JIK8_HUMAN Cysteine protease (Fragment) OS=Homo sapiens OX=9606 GN=ATG4B PE=1 SV=1;tr|C9JQ72|C9JQ72_HUMAN Cysteine protease (Fragment) OS=Homo sapiens OX=	TRUE	5	2	2	2	1	1	0	1	1	0	1	1	0	35.2	35.2	35.2	10.208	88	88;219;266;393;76	0	9.3969	By MS/MS	By MS/MS		NaN	NaN	NaN	0	0	Median	NaN	NaN	NaN	0	0	Median	NaN	NaN	NaN	0	0
C9JIZ6;P07602;A0A0J9YXB8;Q5BJH1	C9JIZ6;P07602;A0A0J9YXB8;Q5BJH1	2;2;1;1	2;2;1;1	2;2;1;1	Prosaposin;Saposin-A;Saposin-B-Val;Saposin-B;Saposin-C;Saposin-D	PSAP	tr|C9JIZ6|C9JIZ6_HUMAN Prosaposin OS=Homo sapiens OX=9606 GN=PSAP PE=1 SV=2;sp|P07602|SAP_HUMAN Prosaposin OS=Homo sapiens OX=9606 GN=PSAP PE=1 SV=2;tr|A0A0J9YXB8|A0A0J9YXB8_HUMAN Prosaposin (Fragment) OS=Homo sapiens OX=9606 GN=PSAP PE=1 SV=1;tr|Q5BJH1|Q5	TRUE	4	2	2	2	1	1	2	1	1	2	1	1	2	3.8	3.8	3.8	58.44	527	527;524;167;240	0.0016717	2.6149	By MS/MS	By MS/MS	By MS/MS	0.52094	0.98708	15.09	4	2	Median	0.47495	0.864	16.248	4	2	Median	0.92947	0.86886	16.546	4	2
C9JJ19;P82930	C9JJ19;P82930	1;1	1;1	1;1	28S ribosomal protein S34, mitochondrial	MRPS34	tr|C9JJ19|C9JJ19_HUMAN 28S ribosomal protein S34, mitochondrial OS=Homo sapiens OX=9606 GN=MRPS34 PE=1 SV=2;sp|P82930|RT34_HUMAN 28S ribosomal protein S34, mitochondrial OS=Homo sapiens OX=9606 GN=MRPS34 PE=1 SV=2	TRUE	2	1	1	1	1	1	1	1	1	1	1	1	1	6.7	6.7	6.7	26.332	225	225;218	0	3.9382	By MS/MS	By MS/MS	By MS/MS	0.46452	0.46001	5.5581	2	2	Median	0.61697	0.60644	54.437	2	2	Median	1.3282	1.3558	48.952	2	2
P04075;J3KPS3;H3BQN4;H3BPS8;H3BUH7;H3BR04;H3BMQ8;H3BU78;H3BR68;A0A087WXX2	P04075;J3KPS3;H3BQN4;H3BPS8;H3BUH7	31;29;28;19;17;15;14;11;9;1	31;29;28;19;17;15;14;11;9;1	28;28;25;16;17;15;14;11;9;0	Fructose-bisphosphate aldolase A;Fructose-bisphosphate aldolase	ALDOA	sp|P04075|ALDOA_HUMAN Fructose-bisphosphate aldolase A OS=Homo sapiens OX=9606 GN=ALDOA PE=1 SV=2;tr|J3KPS3|J3KPS3_HUMAN Fructose-bisphosphate aldolase OS=Homo sapiens OX=9606 GN=ALDOA PE=1 SV=1;tr|H3BQN4|H3BQN4_HUMAN Fructose-bisphosphate aldolase OS=Homo	TRUE	10	31	31	28	27	29	27	27	29	27	25	27	25	84.3	84.3	74.7	39.42	364	364;368;361;278;155;162;140;204;130;316	0	323.31	By MS/MS	By MS/MS	By MS/MS	0.51384	0.90769	40.446	158	33	Leave out requantified	0.58264	0.93969	44.362	158	33	Leave out requantified	1.0846	1.057	8.4255	158	33
F8WB86;Q6PJ80;C9JLR4;Q92575	F8WB86;Q6PJ80;C9JLR4;Q92575	1;1;1;1	1;1;1;1	1;1;1;1	UBX domain-containing protein 4	UBXN4	tr|F8WB86|F8WB86_HUMAN UBX domain-containing protein 4 OS=Homo sapiens OX=9606 GN=UBXN4 PE=1 SV=1;tr|Q6PJ80|Q6PJ80_HUMAN UBX domain-containing protein 4 OS=Homo sapiens OX=9606 GN=UBXN4 PE=1 SV=1;tr|C9JLR4|C9JLR4_HUMAN UBX domain-containing protein 4 (Frag	TRUE	4	1	1	1	1	1	1	1	1	1	1	1	1	24.6	24.6	24.6	6.9849	65	65;95;117;508	0	3.5482	By MS/MS	By MS/MS	By MS/MS	0.59849	0.9495	38.111	4	2	Median	0.78333	1.0147	26.246	4	2	Median	1.4083	1.2507	26.879	4	2
C9JLU1;P52434	C9JLU1;P52434	2;2	2;2	2;2	DNA-directed RNA polymerases I, II, and III subunit RPABC3	POLR2H	tr|C9JLU1|C9JLU1_HUMAN DNA-directed RNA polymerases I, II, and III subunit RPABC3 (Fragment) OS=Homo sapiens OX=9606 GN=POLR2H PE=1 SV=8;sp|P52434|RPAB3_HUMAN DNA-directed RNA polymerases I, II, and III subunit RPABC3 OS=Homo sapiens OX=9606 GN=POLR2H PE=1	TRUE	2	2	2	2	1	1	0	1	1	0	1	1	0	24.3	24.3	24.3	16.925	148	148;150	0	8.0842	By MS/MS	By MS/MS		0.54935	0.91278	26.968	2	1	Median	0.65009	1.0591	6.3482	2	1	Median	0.99439	0.97199	3.6066	2	1
C9JP35;C9JMN4;Q92520	C9JP35;C9JMN4;Q92520	1;1;1	1;1;1	1;1;1	Protein FAM3C	FAM3C	tr|C9JP35|C9JP35_HUMAN Protein FAM3C (Fragment) OS=Homo sapiens OX=9606 GN=FAM3C PE=1 SV=1;tr|C9JMN4|C9JMN4_HUMAN Protein FAM3C (Fragment) OS=Homo sapiens OX=9606 GN=FAM3C PE=1 SV=1;sp|Q92520|FAM3C_HUMAN Protein FAM3C OS=Homo sapiens OX=9606 GN=FAM3C PE=1	TRUE	3	1	1	1	1	0	0	1	0	0	1	0	0	11	11	11	11.596	109	109;151;227	0.0074166	1.8683	By MS/MS			NaN	NaN	NaN	1	1	Median	NaN	NaN	NaN	1	1	Median	NaN	NaN	NaN	1	1
P30043;A0A2R8YEP4;M0R192;A0A2R8Y7Y9;M0QZL1	P30043;A0A2R8YEP4;M0R192	5;4;3;2;2	5;4;3;2;2	5;4;3;2;2	Flavin reductase (NADPH)	BLVRB	sp|P30043|BLVRB_HUMAN Flavin reductase (NADPH) OS=Homo sapiens OX=9606 GN=BLVRB PE=1 SV=3;tr|A0A2R8YEP4|A0A2R8YEP4_HUMAN Flavin reductase (NADPH) OS=Homo sapiens OX=9606 GN=BLVRB PE=1 SV=1;tr|M0R192|M0R192_HUMAN Flavin reductase (NADPH) OS=Homo sapiens OX=	TRUE	5	5	5	5	4	2	4	4	2	4	4	2	4	35.4	35.4	35.4	22.119	206	206;245;163;121;154	0	12.247	By MS/MS	By MS/MS	By MS/MS	0.39342	0.80843	2.2851	9	5	Leave out requantified	0.51232	0.97866	3.7577	8	4	Leave out requantified	1.2417	1.2523	0.47464	8	4
P62328	P62328	4	4	4	Thymosin beta-4;Hematopoietic system regulatory peptide	TMSB4X	sp|P62328|TYB4_HUMAN Thymosin beta-4 OS=Homo sapiens OX=9606 GN=TMSB4X PE=1 SV=2	TRUE	1	4	4	4	4	3	3	4	3	3	4	3	3	86.4	86.4	86.4	5.0526	44	44	0	21.945	By MS/MS	By MS/MS	By MS/MS	0.65015	0.86955	12.015	17	8	Leave out requantified	0.61241	0.77459	16.688	17	8	Leave out requantified	0.94446	0.84738	9.2697	16	8
C9JSR1;Q8NCE2	C9JSR1;Q8NCE2	1;1	1;1	1;1	Myotubularin-related protein 14	MTMR14	tr|C9JSR1|C9JSR1_HUMAN Myotubularin-related protein 14 OS=Homo sapiens OX=9606 GN=MTMR14 PE=1 SV=1;sp|Q8NCE2|MTMRE_HUMAN Myotubularin-related protein 14 OS=Homo sapiens OX=9606 GN=MTMR14 PE=1 SV=2	TRUE	2	1	1	1	1	0	1	1	0	1	1	0	1	6.5	6.5	6.5	31.444	292	292;650	0	6.4409	By MS/MS		By MS/MS	0.4781	0.96371	17.136	3	0	Median	0.40519	0.64605	15.087	3	0	Median	0.76072	0.73015	9.863	2	0
C9JUK7;P16150	C9JUK7;P16150	1;1	1;1	1;1	Leukosialin	SPN	tr|C9JUK7|C9JUK7_HUMAN Leukosialin (Fragment) OS=Homo sapiens OX=9606 GN=SPN PE=1 SV=1;sp|P16150|LEUK_HUMAN Leukosialin OS=Homo sapiens OX=9606 GN=SPN PE=1 SV=1	TRUE	2	1	1	1	1	1	1	1	1	1	1	1	1	2.3	2.3	2.3	35.962	355	355;400	0.0071384	1.9088	By MS/MS	By MS/MS	By MS/MS	0.57262	1.2389	11.192	5	4	Median	0.44977	0.92815	6.9947	5	4	Median	0.75158	0.77608	7.5347	5	4
C9JVB6;Q7L0Y3	C9JVB6;Q7L0Y3	1;1	1;1	1;1	Mitochondrial ribonuclease P protein 1	TRMT10C	tr|C9JVB6|C9JVB6_HUMAN tRNA methyltransferase 10 homolog C (Fragment) OS=Homo sapiens OX=9606 GN=TRMT10C PE=1 SV=1;sp|Q7L0Y3|TM10C_HUMAN tRNA methyltransferase 10 homolog C OS=Homo sapiens OX=9606 GN=TRMT10C PE=1 SV=2	TRUE	2	1	1	1	1	1	1	1	1	1	1	1	1	5.8	5.8	5.8	36.828	312	312;403	0	8.0615	By MS/MS	By MS/MS	By MS/MS	0.62955	0.99124	11.696	3	1	Plateau	0.47974	0.80544	16.101	3	1	Median	0.76203	0.72393	31.719	3	1
C9JXI1;C9JVP0;Q9UPW0	C9JXI1;C9JVP0;Q9UPW0	1;1;1	1;1;1	1;1;1	Forkhead box protein J3	FOXJ3	tr|C9JXI1|C9JXI1_HUMAN Forkhead box protein J3 (Fragment) OS=Homo sapiens OX=9606 GN=FOXJ3 PE=1 SV=8;tr|C9JVP0|C9JVP0_HUMAN Forkhead box J3, isoform CRA_b (Fragment) OS=Homo sapiens OX=9606 GN=FOXJ3 PE=1 SV=1;sp|Q9UPW0|FOXJ3_HUMAN Forkhead box protein J3 O	TRUE	3	1	1	1	0	1	0	0	1	0	0	1	0	17.4	17.4	17.4	9.1108	86	86;382;622	0.00035663	3.3697		By MS/MS		NaN	NaN	NaN	1	1	Median	NaN	NaN	NaN	1	1	Median	NaN	NaN	NaN	1	1
C9JW69;P18754;C9JRH2;C9J3R0;C9JMJ4;C9JQZ4	C9JW69;P18754;C9JRH2;C9J3R0;C9JMJ4;C9JQZ4	2;2;1;1;1;1	2;2;1;1;1;1	2;2;1;1;1;1	Regulator of chromosome condensation	RCC1	tr|C9JW69|C9JW69_HUMAN Regulator of chromosome condensation (Fragment) OS=Homo sapiens OX=9606 GN=RCC1 PE=1 SV=1;sp|P18754|RCC1_HUMAN Regulator of chromosome condensation OS=Homo sapiens OX=9606 GN=RCC1 PE=1 SV=1;tr|C9JRH2|C9JRH2_HUMAN Regulator of chromos	TRUE	6	2	2	2	2	0	1	2	0	1	2	0	1	4.8	4.8	4.8	39.584	372	372;421;230;264;272;283	0	3.5499	By MS/MS		By MS/MS	0.54477	1.046	25.111	3	1	Median	0.61027	1.1182	22.26	3	1	Median	1.233	1.1605	7.2214	3	1
CON__A2I7N3;CON__REFSEQ:XP_001252647	CON__A2I7N3;CON__REFSEQ:XP_001252647	4;3	4;3	4;3			;	non-human	2	4	4	4	4	0	0	4	0	0	4	0	0	10.3	10.3	10.3	46.941	417	417;417	0	9.3814	By MS/MS			NaN	NaN	NaN	0	0	Median	NaN	NaN	NaN	0	0	Median	NaN	NaN	NaN	0	0
CON__ENSEMBL:ENSBTAP00000024146	CON__ENSEMBL:ENSBTAP00000024146	17	17	16				non-human	1	17	17	16	14	12	8	14	12	8	13	11	7	17.7	17.7	17	164.34	1477	1477	0	67.016	By MS/MS	By MS/MS	By MS/MS	0.27314	0.37948	138.1	13	12	Median	0.21835	0.32359	65.874	11	10	Median	0.6375	0.60279	168.51	11	10
CON__ENSEMBL:ENSBTAP00000025008;Q9H4B7	CON__ENSEMBL:ENSBTAP00000025008;Q9H4B7	6;5	1;0	1;0	Tubulin beta-1 chain	TUBB1	;sp|Q9H4B7|TBB1_HUMAN Tubulin beta-1 chain OS=Homo sapiens OX=9606 GN=TUBB1 PE=1 SV=1	TRUE	2	6	1	1	4	5	5	0	1	0	0	1	0	7.6	2.2	2.2	59.299	536	536;451	1	-2	By matching	By MS/MS	By matching	NaN	NaN	NaN	0	0	Median	NaN	NaN	NaN	0	0	Median	NaN	NaN	NaN	0	0
CON__P00761	CON__P00761	5	5	5				non-human	1	5	5	5	5	3	4	5	3	4	5	3	4	25.1	25.1	25.1	24.409	231	231	0	100.14	By MS/MS	By MS/MS	By MS/MS	0.10831	0.16856	120.72	13	13	Median	0.017856	0.024131	207.31	10	10	Median	0.20085	0.20169	285.37	10	10
CON__P01966;G3V1N2;A0A2R8Y7C0;P69905	CON__P01966	3;1;1;1	3;1;1;1	3;1;1;1				non-human	4	3	3	3	3	2	2	3	2	2	3	2	2	32.4	32.4	32.4	15.184	142	142;110;134;142	0	13.656	By MS/MS	By MS/MS	By MS/MS	NaN	NaN	NaN	1	1	Median	NaN	NaN	NaN	0	0	Median	NaN	NaN	NaN	0	0
P02533;CON__P02533;CON__Q6IFX2;F5GWP8;CON__A2A4G1;CON__P19012;CON__Q9Z2K1;K7ESE1;CON__Q3ZAW8;P19012;P08727;C9JM50;CON__P08727;CON__P19001;CON__REFSEQ:XP_986630;CON__Q92764;CON__O76014;CON__Q99456;CON__P05784;CON__Q7Z3Y9;CON__O76013;A0A3B3ITG2;CON__O76015;CON__Q497I4;CON__A2AB72;CON__Q61782;C9JTG5;CON__Q14532;C4AM86;CON__Q14525;CON__A2A5Y0;K7EMS3;CON__Q15323;CON__Q9UE12;Q7Z3Y9;Q99456;O76013;F8VZY9…	P02533;CON__P02533;CON__Q6IFX2	14;14;7;6;5;4;4;4;4;4;3;3;3;3;1;1;1;1;1;1;1;1;1;1;1;1;1;1;1;1;1;1;1;1;1;1;1;1;1;1;1;1;1;1;1;1	6;6;3;4;0;0;0;4;0;0;0;0;0;0;0;0;0;0;0;0;0;0;0;0;0;1;0;0;0;0;0;0;0;0;0;0;0;0;0;0;0;0;0;0;0;0	2;2;1;0;0;0;0;0;0;0;0;0;0;0;0;0;0;0;0;0;0;0;0;0;0;1;0;0;0;0;0;0;0;0;0;0;0;0;0;0;0;0;0;0;0;0	Keratin, type I cytoskeletal 14	KRT14	sp|P02533|K1C14_HUMAN Keratin, type I cytoskeletal 14 OS=Homo sapiens OX=9606 GN=KRT14 PE=1 SV=4;;	TRUE	46	14	6	2	9	8	12	3	2	5	1	1	2	28.4	14.8	6.4	51.561	472	472;472;452;349;456;456;469;95;474;456;400;196;400;403;476;425;471;494;423;468;467;206;456;455;453;93;220;448;425;404;416;181;416;416;468;494;467;391;416;456;404;455;449;430;291;448	0	66.868	By MS/MS	By MS/MS	By MS/MS	0.10076	0.17841	33.267	4	4	Linear	0.072319	0.13938	88.371	3	3	Median	0.35112	0.32586	74.635	3	3
CON__P02538;P02538;CON__O95678;O95678;CON__Q8VED5;CON__P07744;CON__P19013;P19013	CON__P02538;P02538	19;19;8;8;7;4;2;2	6;6;2;2;1;0;0;0	1;1;0;0;0;0;0;0	Keratin, type II cytoskeletal 6A	KRT6A	;sp|P02538|K2C6A_HUMAN Keratin, type II cytoskeletal 6A OS=Homo sapiens OX=9606 GN=KRT6A PE=1 SV=3	TRUE	8	19	6	1	16	9	14	4	3	4	1	1	1	29.8	10.8	1.8	60.044	564	564;564;551;551;531;525;594;534	0	13.919	By MS/MS	By MS/MS	By MS/MS	0.22514	0.38573	54.311	2	2	Median	0.38713	0.61139	27.435	2	2	Median	1.7195	1.5618	23.85	2	2
CON__P02662	CON__P02662	2	2	2				non-human	1	2	2	2	1	0	2	1	0	2	1	0	2	11.1	11.1	11.1	22.975	199	199	0.0026273	2.4535	By MS/MS		By MS/MS	NaN	NaN	NaN	0	0	Median	NaN	NaN	NaN	0	0	Median	NaN	NaN	NaN	0	0
CON__P02769	CON__P02769	17	17	14				non-human	1	17	17	14	13	11	11	13	11	11	10	9	10	26	26	22.4	69.293	607	607	0	76.205	By MS/MS	By MS/MS	By MS/MS	0.01059	0.015745	144.11	11	11	Linear	0.1292	0.18704	101.23	8	8	Median	1.1627	1.0376	219.65	8	8
CON__P06868	CON__P06868	2	2	2				non-human	1	2	2	2	2	1	2	2	1	2	2	1	2	3.1	3.1	3.1	91.215	812	812	0	6.1428	By MS/MS	By MS/MS	By MS/MS	NaN	NaN	NaN	1	1	Median	NaN	NaN	NaN	0	0	Median	NaN	NaN	NaN	0	0
P08779;CON__P08779;K7ENW6	P08779;CON__P08779	15;15;3	11;11;3	7;7;2	Keratin, type I cytoskeletal 16	KRT16	sp|P08779|K1C16_HUMAN Keratin, type I cytoskeletal 16 OS=Homo sapiens OX=9606 GN=KRT16 PE=1 SV=4;	TRUE	3	15	11	7	12	10	13	8	6	10	6	4	6	36.2	30.9	22.6	51.267	473	473;473;162	0	90.7	By MS/MS	By MS/MS	By MS/MS	0.14233	0.26248	90.435	6	6	Median	0.18562	0.24657	140.07	5	5	Median	0.85447	0.76515	131.65	5	5
CON__P12763	CON__P12763	3	3	3				non-human	1	3	3	3	2	3	2	2	3	2	2	3	2	10	10	10	38.418	359	359	0	92.319	By MS/MS	By MS/MS	By MS/MS	0.068775	0.11288	46.559	4	4	Median	NaN	NaN	NaN	0	0	Median	NaN	NaN	NaN	0	0
CON__P13645;P13645;CON__P02535-1;CON__P08730-1;CON__Q148H6;CON__Q7Z3Y7;Q7Z3Y7;CON__Q7Z3Z0;CON__Q7Z3Y8;CON__Q2M2I5;Q7Z3Z0;Q7Z3Y8;Q2M2I5	CON__P13645;P13645	29;29;11;4;3;3;3;2;2;2;2;2;2	29;29;11;4;3;3;3;2;2;2;2;2;2	23;23;7;0;1;1;1;1;1;0;1;1;0	Keratin, type I cytoskeletal 10	KRT10	;sp|P13645|K1C10_HUMAN Keratin, type I cytoskeletal 10 OS=Homo sapiens OX=9606 GN=KRT10 PE=1 SV=6	TRUE	13	29	29	23	23	19	25	23	19	25	17	13	21	39.5	39.5	33.4	59.51	593	593;584;570;437;464;486;464;450;459;525;450;459;525	0	323.31	By MS/MS	By MS/MS	By MS/MS	0.030682	0.13573	149.81	44	42	Plateau	0.04765	0.085862	153.03	23	21	Median	0.96409	0.88512	115.5	23	21
CON__P13647;P13647;F8W0C6;H0YIN9;H0YI76;F8VV57;F8VU69	CON__P13647;P13647;F8W0C6	21;21;11;8;6;3;1	14;14;6;7;4;3;1	3;3;0;1;1;2;0	Keratin, type II cytoskeletal 5	KRT5	;sp|P13647|K2C5_HUMAN Keratin, type II cytoskeletal 5 OS=Homo sapiens OX=9606 GN=KRT5 PE=1 SV=3;tr|F8W0C6|F8W0C6_HUMAN Keratin, type II cytoskeletal 5 (Fragment) OS=Homo sapiens OX=9606 GN=KRT5 PE=1 SV=8	TRUE	7	21	14	3	19	7	14	12	2	8	2	0	2	30.3	21	3.6	62.378	590	590;590;178;196;201;132;147	0	51.055	By MS/MS	By MS/MS	By MS/MS	0.082045	0.14316	113.96	8	8	Median	0.11767	0.20286	71.006	8	8	Median	2.193	2.228	163.89	8	8
CON__P15497	CON__P15497	1	1	1				non-human	1	1	1	1	1	1	1	1	1	1	1	1	1	5.3	5.3	5.3	30.276	265	265	0	9.4403	By MS/MS	By MS/MS	By MS/MS	NaN	NaN	NaN	0	0	Median	NaN	NaN	NaN	0	0	Median	NaN	NaN	NaN	0	0
CON__P34955	CON__P34955	12	12	12				non-human	1	12	12	12	10	6	5	10	6	5	10	6	5	28.4	28.4	28.4	46.103	416	416	0	58.589	By MS/MS	By MS/MS	By MS/MS	0.094492	0.16946	78.803	6	6	Median	0.03681	0.046713	63.582	4	4	Median	0.84335	0.73994	70.886	4	4
CON__P35908v2;CON__P35908;P35908;CON__Q9R0H5;CON__Q6NXH9;CON__Q7Z794;Q7Z794	CON__P35908v2;CON__P35908;P35908	36;36;36;2;2;2;2	33;33;33;1;1;1;1	23;23;23;0;0;0;0	Keratin, type II cytoskeletal 2 epidermal	KRT2	;;sp|P35908|K22E_HUMAN Keratin, type II cytoskeletal 2 epidermal OS=Homo sapiens OX=9606 GN=KRT2 PE=1 SV=2	TRUE	7	36	33	23	29	18	28	27	15	26	18	12	19	63.7	59.9	46.9	65.432	639	639;645;639;524;539;578;578	0	232.14	By MS/MS	By MS/MS	By MS/MS	0.0060172	0.010072	121.8	34	34	Linear	0.0048938	0.0073281	122.1	21	21	Linear	1.314	1.1199	89.617	21	21
CON__P41361;Q8TCE1;P01008	CON__P41361	5;1;1	5;1;1	5;1;1				non-human	3	5	5	5	4	5	4	4	5	4	4	5	4	14.8	14.8	14.8	52.347	465	465;259;464	0	37.853	By MS/MS	By MS/MS	By MS/MS	0.16167	0.24433	48.171	7	7	Median	0.2448	0.43821	82.71	3	3	Median	1.2219	1.1358	71.302	3	3
CON__Q29443;CON__Q0IIK2;E7EQB2;E7ER44;P02788	CON__Q29443;CON__Q0IIK2	4;4;1;1;1	4;4;1;1;1	4;4;1;1;1			;	non-human	5	4	4	4	3	3	3	3	3	3	3	3	3	6.1	6.1	6.1	75.829	685	685;704;696;708;710	0	11.533	By MS/MS	By MS/MS	By MS/MS	NaN	NaN	NaN	1	1	Median	NaN	NaN	NaN	0	0	Median	NaN	NaN	NaN	0	0
CON__Q14CN4-1;CON__Q6IME9;Q14CN4;CON__Q3SY84;CON__Q7RTS7;CON__Q32MB2;F8W1S1;Q3SY84;Q7RTS7;Q86Y46;H0YIG3	CON__Q14CN4-1;CON__Q6IME9;Q14CN4;CON__Q3SY84;CON__Q7RTS7;CON__Q32MB2;F8W1S1;Q3SY84;Q7RTS7;Q86Y46	3;3;3;2;2;2;2;2;2;2;1	1;1;1;1;1;1;1;1;1;1;1	1;1;1;1;1;1;1;1;1;1;1	Keratin, type II cytoskeletal 72;Keratin, type II cytoskeletal 71;Keratin, type II cytoskeletal 74;Keratin, type II cytoskeletal 73	KRT72;KRT74;KRT71;KRT73	;;sp|Q14CN4|K2C72_HUMAN Keratin, type II cytoskeletal 72 OS=Homo sapiens OX=9606 GN=KRT72 PE=1 SV=2;;;;tr|F8W1S1|F8W1S1_HUMAN Keratin, type II cytoskeletal 74 OS=Homo sapiens OX=9606 GN=KRT74 PE=1 SV=1;sp|Q3SY84|K2C71_HUMAN Keratin, type II cytoskeletal 71	TRUE	11	3	1	1	2	0	3	1	0	1	1	0	1	5.5	2.3	2.3	55.877	511	511;520;511;523;529;540;543;523;529;540;192	0.0029421	2.4166	By MS/MS		By MS/MS	NaN	NaN	NaN	0	0	Median	NaN	NaN	NaN	0	0	Median	NaN	NaN	NaN	0	0
CON__Q3SX09;CON__P02070;A8MUF7;F8W6P5;E9PEW8;A0A2R8Y7R2;E9PFT6;A0A2R8Y7X9;P69892;P69891;P68871;P02100;P02042	CON__Q3SX09	9;4;1;1;1;1;1;1;1;1;1;1;1	9;4;1;1;1;1;1;1;1;1;1;1;1	9;4;1;1;1;1;1;1;1;1;1;1;1				non-human	13	9	9	9	8	7	6	8	7	6	8	7	6	45.3	45.3	45.3	22.06	201	201;145;87;90;104;111;141;168;147;147;147;147;147	0	74.638	By MS/MS	By MS/MS	By MS/MS	0.028267	0.04559	120.85	13	13	Linear	0.10951	0.16217	53.406	10	10	Median	0.75855	0.76947	141.13	10	10
CON__Q3T052	CON__Q3T052	4	4	4				non-human	1	4	4	4	2	1	4	2	1	4	2	1	4	5	5	5	101.51	916	916	0	10.381	By MS/MS	By MS/MS	By MS/MS	0.17364	0.33347	60.42	3	3	Median	1.0504	2.0875	110.44	3	3	Median	2.6911	2.5406	88.904	3	3
CON__Q3ZBS7;P04004	CON__Q3ZBS7	11;2	11;2	11;2				non-human	2	11	11	11	8	10	7	8	10	7	8	10	7	24.4	24.4	24.4	54.099	484	484;478	0	57.486	By MS/MS	By MS/MS	By MS/MS	0.02189	0.032015	105.65	18	18	Linear	0.089305	0.15486	105.52	14	14	Median	1.0562	1.0979	144.36	14	14
CON__Q7RTT2;CON__Q8N1N4-2;Q8N1N4	CON__Q7RTT2;CON__Q8N1N4-2;Q8N1N4	2;2;2	1;1;1	1;1;1	Keratin, type II cytoskeletal 78	KRT78	;;sp|Q8N1N4|K2C78_HUMAN Keratin, type II cytoskeletal 78 OS=Homo sapiens OX=9606 GN=KRT78 PE=1 SV=2	TRUE	3	2	1	1	2	1	2	1	0	1	1	0	1	3.6	2.3	2.3	56.964	521	521;521;520	0.0091075	1.7645	By MS/MS	By matching	By MS/MS	NaN	NaN	NaN	0	0	Median	NaN	NaN	NaN	0	0	Median	NaN	NaN	NaN	0	0
CON__Q9N2I2	CON__Q9N2I2	9	9	9				non-human	1	9	9	9	6	7	8	6	7	8	6	7	8	30.7	30.7	30.7	45.296	404	404	0	103.38	By MS/MS	By MS/MS	By MS/MS	0.10731	0.21997	42.61	4	4	Median	NaN	NaN	NaN	1	1	Median	NaN	NaN	NaN	1	1
CON__Q9TTE1	CON__Q9TTE1	2	2	2				non-human	1	2	2	2	2	0	1	2	0	1	2	0	1	3.9	3.9	3.9	46.203	411	411	0	5.2331	By MS/MS		By MS/MS	NaN	NaN	NaN	1	1	Median	NaN	NaN	NaN	1	1	Median	NaN	NaN	NaN	1	1
M0QZ70;M0R1J0;D1MQ08;O15554	M0QZ70;M0R1J0;D1MQ08;O15554	1;1;1;1	1;1;1;1	1;1;1;1	Intermediate conductance calcium-activated potassium channel protein 4	KCNN4	tr|M0QZ70|M0QZ70_HUMAN Intermediate conductance calcium-activated potassium channel protein 4 (Fragment) OS=Homo sapiens OX=9606 GN=KCNN4 PE=1 SV=1;tr|M0R1J0|M0R1J0_HUMAN Intermediate conductance calcium-activated potassium channel protein 4 (Fragment) OS=	TRUE	4	1	1	1	0	0	1	0	0	1	0	0	1	25.4	25.4	25.4	6.5594	59	59;165;295;427	0.0032648	2.4039			By MS/MS	NaN	NaN	NaN	0	0	Median	NaN	NaN	NaN	0	0	Median	NaN	NaN	NaN	0	0
P43490;A0A0C4DFS8;C9JG65	P43490;A0A0C4DFS8	16;11;1	16;11;1	16;11;1	Nicotinamide phosphoribosyltransferase	NAMPT	sp|P43490|NAMPT_HUMAN Nicotinamide phosphoribosyltransferase OS=Homo sapiens OX=9606 GN=NAMPT PE=1 SV=1;tr|A0A0C4DFS8|A0A0C4DFS8_HUMAN Nicotinamide phosphoribosyltransferase OS=Homo sapiens OX=9606 GN=NAMPT PE=1 SV=1	TRUE	3	16	16	16	10	12	10	10	12	10	10	12	10	39.7	39.7	39.7	55.52	491	491;368;88	0	58.851	By MS/MS	By MS/MS	By MS/MS	0.57151	0.9926	25.335	29	11	Leave out requantified	1.1894	1.7804	22.606	29	11	Leave out requantified	1.8249	1.6486	23.883	29	11
D3DSM0;E5RIG7;E5RHE6;E5RK54	D3DSM0	25;2;1;1	1;0;0;0	1;0;0;0	Integrin beta	ITGB2	tr|D3DSM0|D3DSM0_HUMAN Integrin beta OS=Homo sapiens OX=9606 GN=ITGB2 PE=1 SV=1	TRUE	4	25	1	1	24	25	23	1	1	1	1	1	1	39.3	2.5	2.5	78.354	712	712;120;37;49	0	111.08	By MS/MS	By MS/MS	By MS/MS	0.70924	0.96609	14.112	6	0	Median	0.65135	0.77553	10.678	6	0	Median	0.88426	0.88265	13.804	6	0
P04792;F8WE04;C9J3N8	P04792	18;8;3	18;8;3	18;8;3	Heat shock protein beta-1	HSPB1	sp|P04792|HSPB1_HUMAN Heat shock protein beta-1 OS=Homo sapiens OX=9606 GN=HSPB1 PE=1 SV=2	TRUE	3	18	18	18	15	17	15	15	17	15	15	17	15	72.2	72.2	72.2	22.782	205	205;186;37	0	225.2	By MS/MS	By MS/MS	By MS/MS	0.439	0.75327	24.812	65	14	Leave out requantified	0.44333	0.69678	25.023	64	13	Leave out requantified	1.0349	1.0043	10.503	64	13
Q00534;F8VXD2;A0A087WZU2;A0A2R8Y4Z0;J3QSD7;A0A2R8Y7W5;A0A2R8YF61;F5H6Z0;A0A2R8YD28;A0A087X209;E9BTB9;E5RGN0;G3V5T9;A0A2R8YEB7;Q9BVE2;E7EUK8;K7ELV5;H0YAZ9;F8VYH9;A0A2R8Y644;E7ESI2;Q9NYV4;K7EJ83;F8VZ51;F8VTV8;F8VWX7;Q00526;Q00536;Q00537;F8VZZ0;O94921;Q07002;P11802;Q96Q40;P50750;P24941;Q14004	Q00534	8;1;1;1;1;1;1;1;1;1;1;1;1;1;1;1;1;1;1;1;1;1;1;1;1;1;1;1;1;1;1;1;1;1;1;1;1	8;1;1;1;1;1;1;1;1;1;1;1;1;1;1;1;1;1;1;1;1;1;1;1;1;1;1;1;1;1;1;1;1;1;1;1;1	7;0;0;0;0;0;0;0;0;0;0;0;0;0;0;0;0;0;0;0;0;0;0;0;0;0;0;0;0;0;0;0;0;0;0;0;0	Cyclin-dependent kinase 6	CDK6	sp|Q00534|CDK6_HUMAN Cyclin-dependent kinase 6 OS=Homo sapiens OX=9606 GN=CDK6 PE=1 SV=1	TRUE	37	8	8	7	7	7	7	7	7	7	6	7	7	31.6	31.6	29.1	36.938	326	326;132;448;1308;1201;1099;915;470;456;418;311;393;346;143;324;340;164;260;170;239;238;1490;213;208;201;203;305;496;523;186;469;474;303;435;372;298;1512	0	39.562	By MS/MS	By MS/MS	By MS/MS	0.60874	1.1629	14.571	21	2	Leave out requantified	0.56585	1.0878	10.032	21	2	Leave out requantified	1.0268	1.0071	17.339	21	2
Q9UHD8;K7EL40;K7EK18;K7EQD7;K7ER52;K7EIE4;K7ELJ9;K7ER14;K7EKN4;K7EN52;K7ENQ5;K7EJZ2;K7EIR4;K7EJL9;K7EQ08;K7ENL0;K7EJ51;K7EJV0;K7EPY1	Q9UHD8;K7EL40;K7EK18	14;8;7;6;6;6;5;5;4;4;4;4;4;4;2;2;2;2;2	14;8;7;6;6;6;5;5;4;4;4;4;4;4;2;2;2;2;2	14;8;7;6;6;6;5;5;4;4;4;4;4;4;2;2;2;2;2	Septin-9	SEPT9	sp|Q9UHD8|SEPT9_HUMAN Septin-9 OS=Homo sapiens OX=9606 GN=SEPT9 PE=1 SV=2;tr|K7EL40|K7EL40_HUMAN Septin-9 (Fragment) OS=Homo sapiens OX=9606 GN=SEPT9 PE=1 SV=1;tr|K7EK18|K7EK18_HUMAN Septin-9 (Fragment) OS=Homo sapiens OX=9606 GN=SEPT9 PE=1 SV=1	TRUE	19	14	14	14	10	12	10	10	12	10	10	12	10	33.4	33.4	33.4	65.401	586	586;209;195;165;151;157;144;159;107;115;127;135;104;189;57;152;134;125;151	0	85.494	By MS/MS	By MS/MS	By MS/MS	0.70568	1.1897	22.296	33	12	Leave out requantified	0.6813	1.0735	17.543	33	12	Leave out requantified	0.94387	0.87382	17.203	33	12
P05107;J3KNI6;E7EVZ9;E5RK25	P05107;J3KNI6	28;16;4;3	28;16;4;3	4;4;2;1	Integrin beta-2;Integrin beta	ITGB2	sp|P05107|ITB2_HUMAN Integrin beta-2 OS=Homo sapiens OX=9606 GN=ITGB2 PE=1 SV=2;tr|J3KNI6|J3KNI6_HUMAN Integrin beta (Fragment) OS=Homo sapiens OX=9606 GN=ITGB2 PE=1 SV=1	TRUE	4	28	28	4	27	28	26	27	28	26	4	4	4	37.5	37.5	5.2	84.781	769	769;322;166;160	0	259.05	By MS/MS	By MS/MS	By MS/MS	0.51846	0.90174	13.94	107	11	Leave out requantified	0.54671	0.83728	9.4252	107	11	Leave out requantified	0.94964	0.90466	10.474	106	11
D6R9Z6;H0YA82;Q4G0J3	D6R9Z6;H0YA82;Q4G0J3	2;2;2	2;2;2	2;2;2	La-related protein 7	LARP7	tr|D6R9Z6|D6R9Z6_HUMAN La-related protein 7 (Fragment) OS=Homo sapiens OX=9606 GN=LARP7 PE=1 SV=1;tr|H0YA82|H0YA82_HUMAN La-related protein 7 (Fragment) OS=Homo sapiens OX=9606 GN=LARP7 PE=1 SV=1;sp|Q4G0J3|LARP7_HUMAN La-related protein 7 OS=Homo sapiens O	TRUE	3	2	2	2	0	1	1	0	1	1	0	1	1	12.9	12.9	12.9	17.499	155	155;334;582	0.0019848	2.5384		By MS/MS	By MS/MS	NaN	NaN	NaN	1	1	Median	NaN	NaN	NaN	1	1	Median	NaN	NaN	NaN	1	1
D6RIZ4;D6RA47;D6RE79;Q14728	D6RIZ4;D6RA47;D6RE79;Q14728	1;1;1;1	1;1;1;1	1;1;1;1	Major facilitator superfamily domain-containing protein 10	MFSD10	tr|D6RIZ4|D6RIZ4_HUMAN Major facilitator superfamily domain-containing protein 10 OS=Homo sapiens OX=9606 GN=MFSD10 PE=1 SV=1;tr|D6RA47|D6RA47_HUMAN Major facilitator superfamily domain-containing protein 10 OS=Homo sapiens OX=9606 GN=MFSD10 PE=1 SV=1;tr|D	TRUE	4	1	1	1	1	1	1	1	1	1	1	1	1	3.7	3.7	3.7	38.247	356	356;366;480;455	0	10.98	By MS/MS	By MS/MS	By MS/MS	0.51926	1.0998	7.5548	3	0	Median	0.48364	1.0017	2.7651	3	0	Plateau	0.94819	0.89474	10.375	3	0
Q9BZK7;A0A0D9SF63;C9IYU9;F8W9D8;A0A1B0GUU2;A0A0D9SFS8;A0A1B0GVH3;A0A0D9SF25;C9J7E1;C9JCW4;C9JLJ1;C9J903;C9J3H2;C9JEC9;C9JBN1;C9JCK0;C9JY82;C9JTW8;A0A0D9SEW5	Q9BZK7;A0A0D9SF63;C9IYU9;F8W9D8;A0A1B0GUU2	3;3;2;2;2;1;1;1;1;1;1;1;1;1;1;1;1;1;1	3;3;2;2;2;1;1;1;1;1;1;1;1;1;1;1;1;1;1	3;3;2;2;2;1;1;1;1;1;1;1;1;1;1;1;1;1;1	F-box-like/WD repeat-containing protein TBL1XR1	TBL1XR1	sp|Q9BZK7|TBL1R_HUMAN F-box-like/WD repeat-containing protein TBL1XR1 OS=Homo sapiens OX=9606 GN=TBL1XR1 PE=1 SV=1;tr|A0A0D9SF63|A0A0D9SF63_HUMAN F-box-like/WD repeat-containing protein TBL1XR1 OS=Homo sapiens OX=9606 GN=TBL1XR1 PE=1 SV=1;tr|C9IYU9|C9IYU9_	TRUE	19	3	3	3	2	3	2	2	3	2	2	3	2	10.5	10.5	10.5	55.594	514	514;474;145;144;131;112;271;122;120;33;55;96;86;81;75;73;72;61;105	0	15.383	By MS/MS	By MS/MS	By MS/MS	0.47679	0.86711	12.32	5	4	Median	0.59219	0.82771	23.754	6	4	Plateau	0.95074	0.85156	27.837	6	4
Q7L591;D6RAM3;D6RC22	Q7L591;D6RAM3;D6RC22	2;2;1	2;2;1	2;2;1	Docking protein 3	DOK3	sp|Q7L591|DOK3_HUMAN Docking protein 3 OS=Homo sapiens OX=9606 GN=DOK3 PE=1 SV=2;tr|D6RAM3|D6RAM3_HUMAN Docking protein 3 OS=Homo sapiens OX=9606 GN=DOK3 PE=1 SV=1;tr|D6RC22|D6RC22_HUMAN Docking protein 3 (Fragment) OS=Homo sapiens OX=9606 GN=DOK3 PE=1 SV=	TRUE	3	2	2	2	2	1	2	2	1	2	2	1	2	7.1	7.1	7.1	53.288	496	496;440;213	0	6.1767	By MS/MS	By MS/MS	By MS/MS	0.66828	1.1296	33.647	5	5	Median	0.57158	1.0218	31.402	3	3	Median	1.3193	1.2213	59.191	3	3
Q92556;C9JIW2;C9IZR8	Q92556	6;1;1	6;1;1	5;1;1	Engulfment and cell motility protein 1	ELMO1	sp|Q92556|ELMO1_HUMAN Engulfment and cell motility protein 1 OS=Homo sapiens OX=9606 GN=ELMO1 PE=1 SV=2	TRUE	3	6	6	5	4	4	5	4	4	5	3	4	4	13.6	13.6	12.2	83.829	727	727;149;167	0	19.722	By MS/MS	By MS/MS	By MS/MS	0.62334	0.92723	3.1057	12	5	Leave out requantified	0.82668	1.0718	0.88651	12	5	Leave out requantified	1.2756	1.1656	16.118	12	5
D6RC25;D6RGX6;Q9C0F1	D6RC25;D6RGX6;Q9C0F1	1;1;1	1;1;1	1;1;1	Centrosomal protein of 44 kDa	CEP44	tr|D6RC25|D6RC25_HUMAN Centrosomal protein of 44 kDa (Fragment) OS=Homo sapiens OX=9606 GN=CEP44 PE=1 SV=1;tr|D6RGX6|D6RGX6_HUMAN Centrosomal protein of 44 kDa (Fragment) OS=Homo sapiens OX=9606 GN=CEP44 PE=1 SV=1;sp|Q9C0F1|CEP44_HUMAN Centrosomal protein	TRUE	3	1	1	1	0	1	1	0	1	1	0	1	1	10.1	10.1	10.1	16.017	139	139;198;390	0	4.0024		By MS/MS	By MS/MS	0.38356	0.6137	12.495	2	2	Median	0.37193	0.52307	9.7715	2	2	Median	0.96968	0.83245	22.086	2	2
J3QSY4;D6RC52;D6RCB9;Q9NX24	J3QSY4;D6RC52;D6RCB9;Q9NX24	1;1;1;1	1;1;1;1	1;1;1;1	H/ACA ribonucleoprotein complex subunit 2	NHP2	tr|J3QSY4|J3QSY4_HUMAN H/ACA ribonucleoprotein complex subunit 2 OS=Homo sapiens OX=9606 GN=NHP2 PE=1 SV=1;tr|D6RC52|D6RC52_HUMAN H/ACA ribonucleoprotein complex subunit 2 (Fragment) OS=Homo sapiens OX=9606 GN=NHP2 PE=1 SV=1;tr|D6RCB9|D6RCB9_HUMAN H/ACA ri	TRUE	4	1	1	1	1	1	1	1	1	1	1	1	1	21.1	21.1	21.1	10.071	90	90;132;135;153	0.0010417	3.0169	By MS/MS	By MS/MS	By MS/MS	0.46659	0.98365	28.036	3	3	Median	0.39912	0.76422	7.6615	3	3	Median	0.90192	0.81757	32.667	3	3
P09874;Q5VX84;Q5VX85	P09874	47;3;3	47;3;3	47;3;3	Poly [ADP-ribose] polymerase 1	PARP1	sp|P09874|PARP1_HUMAN Poly [ADP-ribose] polymerase 1 OS=Homo sapiens OX=9606 GN=PARP1 PE=1 SV=4	TRUE	3	47	47	47	40	44	43	40	44	43	40	44	43	53.6	53.6	53.6	113.08	1014	1014;108;155	0	323.31	By MS/MS	By MS/MS	By MS/MS	0.66084	1.0257	19.244	170	44	Leave out requantified	0.57638	0.79643	17.541	169	43	Leave out requantified	0.84144	0.78812	19.892	168	43
D6RCE2;Q6PGP7	D6RCE2;Q6PGP7	1;1	1;1	1;1	Tetratricopeptide repeat protein 37	TTC37	tr|D6RCE2|D6RCE2_HUMAN Tetratricopeptide repeat protein 37 (Fragment) OS=Homo sapiens OX=9606 GN=TTC37 PE=1 SV=1;sp|Q6PGP7|TTC37_HUMAN Tetratricopeptide repeat protein 37 OS=Homo sapiens OX=9606 GN=TTC37 PE=1 SV=1	TRUE	2	1	1	1	1	0	1	1	0	1	1	0	1	2.9	2.9	2.9	69.417	611	611;1564	0.0013596	2.7919	By MS/MS		By MS/MS	0.81064	1.2005	16.313	2	1	Median	0.75091	0.977	45.49	2	1	Median	0.85418	0.74785	72.867	2	1
Q02809;Q5JXB8;Q5JXB7	Q02809	14;2;2	14;2;2	14;2;2	Procollagen-lysine,2-oxoglutarate 5-dioxygenase 1	PLOD1	sp|Q02809|PLOD1_HUMAN Procollagen-lysine,2-oxoglutarate 5-dioxygenase 1 OS=Homo sapiens OX=9606 GN=PLOD1 PE=1 SV=2	TRUE	3	14	14	14	12	9	11	12	9	11	12	9	11	27.5	27.5	27.5	83.549	727	727;225;283	0	56.719	By MS/MS	By MS/MS	By MS/MS	0.58285	0.98256	39.002	34	21	Leave out requantified	0.78474	1.1845	29.828	34	21	Leave out requantified	1.3051	1.2257	30.742	34	21
D6RDG3;H0Y9Y1	D6RDG3;H0Y9Y1	4;3	1;0	1;0	Transcription factor BTF3	BTF3	tr|D6RDG3|D6RDG3_HUMAN Transcription factor BTF3 (Fragment) OS=Homo sapiens OX=9606 GN=BTF3 PE=1 SV=3;tr|H0Y9Y1|H0Y9Y1_HUMAN Transcription factor BTF3 (Fragment) OS=Homo sapiens OX=9606 GN=BTF3 PE=1 SV=2	TRUE	2	4	1	1	3	4	2	1	1	1	1	1	1	47.7	9.2	9.2	11.802	109	109;86	0.0091185	1.7713	By MS/MS	By MS/MS	By matching	0.42976	0.52946	16.741	3	0	Plateau	0.83241	0.8662	17.748	3	0	Median	1.2817	1.223	16.62	3	0
D6RDI2;J3KPP4;O95232;D6RHH0;U3KQT3;E7EN55;C9JL41	D6RDI2;J3KPP4;O95232;D6RHH0;U3KQT3;E7EN55;C9JL41	2;2;2;1;1;1;1	2;2;2;1;1;1;1	2;2;2;1;1;1;1	Luc7-like protein 3	LUC7L3	tr|D6RDI2|D6RDI2_HUMAN Luc7-like protein 3 (Fragment) OS=Homo sapiens OX=9606 GN=LUC7L3 PE=1 SV=1;tr|J3KPP4|J3KPP4_HUMAN Cisplatin resistance-associated overexpressed protein, isoform CRA_b OS=Homo sapiens OX=9606 GN=LUC7L3 PE=1 SV=1;sp|O95232|LC7L3_HUMAN	TRUE	7	2	2	2	1	2	1	1	2	1	1	2	1	14.1	14.1	14.1	20.677	184	184;489;432;36;46;54;79	0	9.5621	By MS/MS	By MS/MS	By MS/MS	0.5083	0.75036	39.701	4	1	Median	0.40895	0.61029	26.404	4	1	Median	0.64156	0.6267	58.261	4	1
D6REA1;Q9H173	D6REA1;Q9H173	2;2	2;2	2;2	Nucleotide exchange factor SIL1	SIL1	tr|D6REA1|D6REA1_HUMAN Nucleotide exchange factor SIL1 OS=Homo sapiens OX=9606 GN=SIL1 PE=1 SV=1;sp|Q9H173|SIL1_HUMAN Nucleotide exchange factor SIL1 OS=Homo sapiens OX=9606 GN=SIL1 PE=1 SV=1	TRUE	2	2	2	2	1	2	1	1	2	1	1	2	1	4.3	4.3	4.3	52.748	468	468;461	0	4.3621	By MS/MS	By MS/MS	By MS/MS	0.68312	0.96234	19.262	4	3	Median	0.79844	1.0786	27.249	4	3	Median	1.8619	1.6147	20.178	4	3
D6REE7;O75116;E9PF63	D6REE7;O75116	3;3;1	3;3;1	2;2;1	Rho-associated protein kinase 2	ROCK2	tr|D6REE7|D6REE7_HUMAN Rho-associated protein kinase 2 OS=Homo sapiens OX=9606 GN=ROCK2 PE=1 SV=1;sp|O75116|ROCK2_HUMAN Rho-associated protein kinase 2 OS=Homo sapiens OX=9606 GN=ROCK2 PE=1 SV=4	TRUE	3	3	3	2	1	2	1	1	2	1	1	1	1	9.6	9.6	7.4	50.727	446	446;1388;1145	0	5.526	By MS/MS	By MS/MS	By MS/MS	0.58122	1.1717	1.82	4	2	Median	1.2563	1.9	36.451	4	2	Linear	0.83475	0.87919	35.506	4	2
D6REM4;E7ETM0;P48729;U3KQ83;U3KPX3;H0Y9X2;U3KQK7;Q8N752	D6REM4;E7ETM0;P48729;U3KQ83;U3KPX3;H0Y9X2;U3KQK7;Q8N752	2;2;2;1;1;1;1;1	2;2;2;1;1;1;1;1	2;2;2;1;1;1;1;1	Casein kinase I isoform alpha;Casein kinase I isoform alpha-like	CSNK1A1;CSNK1A1L	tr|D6REM4|D6REM4_HUMAN Casein kinase I isoform alpha OS=Homo sapiens OX=9606 GN=CSNK1A1 PE=1 SV=1;tr|E7ETM0|E7ETM0_HUMAN Casein kinase I isoform alpha OS=Homo sapiens OX=9606 GN=CSNK1A1 PE=1 SV=1;sp|P48729|KC1A_HUMAN Casein kinase I isoform alpha OS=Homo s	TRUE	8	2	2	2	2	0	0	2	0	0	2	0	0	9.7	9.7	9.7	27.741	236	236;264;337;96;134;167;184;337	0	3.8615	By MS/MS			NaN	NaN	NaN	1	1	Median	NaN	NaN	NaN	1	1	Median	NaN	NaN	NaN	1	1
Q13724;A0A3B3IRW2;A0A3B3IRK6;C9J8D4;A0A3B3IS52;A0A3B3IRI7;A0A3B3ITU6;B8ZZE2;A0A3B3ITC1;C9JDQ1	Q13724;A0A3B3IRW2;A0A3B3IRK6;C9J8D4;A0A3B3IS52	14;12;12;9;7;2;2;2;2;1	14;12;12;9;7;2;2;2;2;1	14;12;12;9;7;2;2;2;2;1	Mannosyl-oligosaccharide glucosidase	MOGS	sp|Q13724|MOGS_HUMAN Mannosyl-oligosaccharide glucosidase OS=Homo sapiens OX=9606 GN=MOGS PE=1 SV=5;tr|A0A3B3IRW2|A0A3B3IRW2_HUMAN Mannosyl-oligosaccharide glucosidase OS=Homo sapiens OX=9606 GN=MOGS PE=1 SV=1;tr|A0A3B3IRK6|A0A3B3IRK6_HUMAN Mannosyl-oligos	TRUE	10	14	14	14	7	12	9	7	12	9	7	12	9	27.7	27.7	27.7	91.916	837	837;562;715;491;428;113;208;209;294;145	0	84.86	By MS/MS	By MS/MS	By MS/MS	0.56886	1.1689	49.388	33	12	Leave out requantified	0.60839	1.128	18.371	32	11	Leave out requantified	1.0155	0.96755	40.114	32	11
P05362;K7EKL8;E7ESS4	P05362;K7EKL8	4;3;1	4;3;1	4;3;1	Intercellular adhesion molecule 1	ICAM1	sp|P05362|ICAM1_HUMAN Intercellular adhesion molecule 1 OS=Homo sapiens OX=9606 GN=ICAM1 PE=1 SV=2;tr|K7EKL8|K7EKL8_HUMAN Intercellular adhesion molecule 1 (Fragment) OS=Homo sapiens OX=9606 GN=ICAM1 PE=1 SV=1	TRUE	3	4	4	4	2	4	3	2	4	3	2	4	3	10	10	10	57.825	532	532;180;310	0	9.246	By MS/MS	By MS/MS	By MS/MS	0.60576	1.159	29.215	9	1	Leave out requantified	1.4109	2.4199	9.7618	9	1	Leave out requantified	2.2295	2.0709	23.037	9	1
D6RF93;P19838	D6RF93;P19838	1;1	1;1	1;1	Nuclear factor NF-kappa-B p105 subunit;Nuclear factor NF-kappa-B p50 subunit	NFKB1	tr|D6RF93|D6RF93_HUMAN Nuclear factor NF-kappa-B p105 subunit (Fragment) OS=Homo sapiens OX=9606 GN=NFKB1 PE=1 SV=1;sp|P19838|NFKB1_HUMAN Nuclear factor NF-kappa-B p105 subunit OS=Homo sapiens OX=9606 GN=NFKB1 PE=1 SV=2	TRUE	2	1	1	1	1	1	0	1	1	0	1	1	0	8.2	8.2	8.2	21.399	196	196;968	0	6.4309	By MS/MS	By MS/MS		NaN	NaN	NaN	1	1	Median	NaN	NaN	NaN	1	1	Median	NaN	NaN	NaN	1	1
P29350;F5H0N8;F5GY79;F5H5H9;F5H1Z8;F5H1V7;F5H4Z1;F5GXD4;U3KQS1	P29350	23;7;5;4;4;2;2;2;2	23;7;5;4;4;2;2;2;2	23;7;5;4;4;2;2;2;2	Tyrosine-protein phosphatase non-receptor type 6	PTPN6	sp|P29350|PTN6_HUMAN Tyrosine-protein phosphatase non-receptor type 6 OS=Homo sapiens OX=9606 GN=PTPN6 PE=1 SV=1	TRUE	9	23	23	23	17	16	18	17	16	18	17	16	18	44	44	44	67.56	595	595;165;144;130;150;56;58;60;72	0	105.91	By MS/MS	By MS/MS	By MS/MS	0.73767	1.171	21.159	55	13	Leave out requantified	0.90906	1.2381	21.182	55	13	Leave out requantified	1.2063	1.0883	12.402	55	13
D6RFL4;P08571	D6RFL4;P08571	3;3	3;3	3;3	Monocyte differentiation antigen CD14;Monocyte differentiation antigen CD14, urinary form;Monocyte differentiation antigen CD14, membrane-bound form	CD14	tr|D6RFL4|D6RFL4_HUMAN Monocyte differentiation antigen CD14 (Fragment) OS=Homo sapiens OX=9606 GN=CD14 PE=1 SV=1;sp|P08571|CD14_HUMAN Monocyte differentiation antigen CD14 OS=Homo sapiens OX=9606 GN=CD14 PE=1 SV=2	TRUE	2	3	3	3	2	0	3	2	0	3	2	0	3	27.2	27.2	27.2	23.313	213	213;375	0	18.868	By MS/MS		By MS/MS	NaN	NaN	NaN	0	0	Median	NaN	NaN	NaN	0	0	Median	NaN	NaN	NaN	0	0
Q8WUM0	Q8WUM0	2	2	2	Nuclear pore complex protein Nup133	NUP133	sp|Q8WUM0|NU133_HUMAN Nuclear pore complex protein Nup133 OS=Homo sapiens OX=9606 GN=NUP133 PE=1 SV=2	TRUE	1	2	2	2	2	2	2	2	2	2	2	2	2	3	3	3	128.98	1156	1156	0	12.791	By MS/MS	By MS/MS	By MS/MS	0.76919	1.2362	33.056	7	5	Median	0.53911	0.81471	9.2234	7	5	Median	0.70088	0.69762	20.367	7	5
Q53GQ0;A0A1B0GVY6;A0A1B0GV93;E9PI21	Q53GQ0;A0A1B0GVY6;A0A1B0GV93	7;5;5;2	7;5;5;2	7;5;5;2	Very-long-chain 3-oxoacyl-CoA reductase	HSD17B12	sp|Q53GQ0|DHB12_HUMAN Very-long-chain 3-oxoacyl-CoA reductase OS=Homo sapiens OX=9606 GN=HSD17B12 PE=1 SV=2;tr|A0A1B0GVY6|A0A1B0GVY6_HUMAN Very-long-chain 3-oxoacyl-CoA reductase (Fragment) OS=Homo sapiens OX=9606 GN=HSD17B12 PE=1 SV=1;tr|A0A1B0GV93|A0A1B0	TRUE	4	7	7	7	6	7	5	6	7	5	6	7	5	32.4	32.4	32.4	34.324	312	312;178;276;164	0	37.229	By MS/MS	By MS/MS	By MS/MS	0.60332	0.93774	16.76	21	4	Leave out requantified	0.71362	0.94713	11.153	21	3	Leave out requantified	1.1041	1.0161	9.923	21	3
D6RIE3;D6RGV5;H0UI06;P14406;D6R9C3	D6RIE3;D6RGV5;H0UI06;P14406;D6R9C3	2;2;2;2;1	2;2;2;2;1	2;2;2;2;1	Cytochrome c oxidase subunit 7A2, mitochondrial	COX7A2	tr|D6RIE3|D6RIE3_HUMAN Cytochrome c oxidase subunit 7A2, mitochondrial OS=Homo sapiens OX=9606 GN=COX7A2 PE=1 SV=1;tr|D6RGV5|D6RGV5_HUMAN Cytochrome c oxidase subunit 7A2, mitochondrial (Fragment) OS=Homo sapiens OX=9606 GN=COX7A2 PE=1 SV=1;tr|H0UI06|H0UI0	TRUE	5	2	2	2	2	2	1	2	2	1	2	2	1	25.3	25.3	25.3	10.264	91	91;103;115;83;53	0	4.7336	By MS/MS	By MS/MS	By MS/MS	0.41768	0.69612	15.786	4	4	Median	0.48269	0.84727	10.923	4	4	Median	1.2373	1.088	15.086	4	4
D6RIY6;Q06265	D6RIY6;Q06265	1;1	1;1	1;1	Exosome complex component RRP45	EXOSC9	tr|D6RIY6|D6RIY6_HUMAN Exosome complex component RRP45 OS=Homo sapiens OX=9606 GN=EXOSC9 PE=1 SV=1;sp|Q06265|EXOS9_HUMAN Exosome complex component RRP45 OS=Homo sapiens OX=9606 GN=EXOSC9 PE=1 SV=3	TRUE	2	1	1	1	1	1	0	1	1	0	1	1	0	2.6	2.6	2.6	46.977	423	423;439	0.0029479	2.4235	By MS/MS	By MS/MS		0.68978	1.3926	0.89052	2	2	Median	0.51159	1.0456	7.3383	2	2	Median	0.74168	0.7473	9.5924	2	2
E2QRG8;Q00765	E2QRG8;Q00765	1;1	1;1	1;1	Receptor expression-enhancing protein;Receptor expression-enhancing protein 5	REEP5	tr|E2QRG8|E2QRG8_HUMAN Receptor expression-enhancing protein (Fragment) OS=Homo sapiens OX=9606 GN=REEP5 PE=1 SV=1;sp|Q00765|REEP5_HUMAN Receptor expression-enhancing protein 5 OS=Homo sapiens OX=9606 GN=REEP5 PE=1 SV=3	TRUE	2	1	1	1	1	1	1	1	1	1	1	1	1	6.1	6.1	6.1	18.121	165	165;189	0	4.7891	By MS/MS	By MS/MS	By MS/MS	0.58663	0.92775	11.553	3	0	Median	0.61022	0.89975	12.593	3	0	Plateau	1.2137	1.0374	15.643	3	0
E5RID7;H0YBX2;G5EA19;U3KQS5;E5RG17;Q6P1N9	E5RID7;H0YBX2;G5EA19;U3KQS5;E5RG17;Q6P1N9	1;1;1;1;1;1	1;1;1;1;1;1	1;1;1;1;1;1	Putative deoxyribonuclease TATDN1	TATDN1	tr|E5RID7|E5RID7_HUMAN Putative deoxyribonuclease TATDN1 OS=Homo sapiens OX=9606 GN=TATDN1 PE=1 SV=1;tr|H0YBX2|H0YBX2_HUMAN Putative deoxyribonuclease TATDN1 (Fragment) OS=Homo sapiens OX=9606 GN=TATDN1 PE=1 SV=1;tr|G5EA19|G5EA19_HUMAN Putative deoxyribonu	TRUE	6	1	1	1	1	1	1	1	1	1	1	1	1	17.7	17.7	17.7	6.9651	62	62;202;207;210;322;297	0	5.882	By MS/MS	By MS/MS	By MS/MS	0.5523	1.1637	18.011	3	0	Plateau	0.42823	0.96669	18.465	3	0	Median	0.91875	0.65741	23.373	3	0
E5RGX5;Q93045	E5RGX5;Q93045	5;5	1;1	1;1	Stathmin;Stathmin-2	STMN2	tr|E5RGX5|E5RGX5_HUMAN Stathmin OS=Homo sapiens OX=9606 GN=STMN2 PE=1 SV=1;sp|Q93045|STMN2_HUMAN Stathmin-2 OS=Homo sapiens OX=9606 GN=STMN2 PE=1 SV=3	TRUE	2	5	1	1	4	4	5	1	1	1	1	1	1	12.5	6	6	19.574	168	168;179	0	3.7009	By MS/MS	By MS/MS	By MS/MS	0.69559	1.0846	14.2	3	0	Median	0.35851	0.45819	8.802	3	0	Plateau	0.48858	0.42126	11.481	3	0
P11177;C9J634;F8WF02	P11177;C9J634;F8WF02	10;6;5	10;6;5	10;6;5	Pyruvate dehydrogenase E1 component subunit beta, mitochondrial	PDHB	sp|P11177|ODPB_HUMAN Pyruvate dehydrogenase E1 component subunit beta, mitochondrial OS=Homo sapiens OX=9606 GN=PDHB PE=1 SV=3;tr|C9J634|C9J634_HUMAN Pyruvate dehydrogenase E1 component subunit beta, mitochondrial OS=Homo sapiens OX=9606 GN=PDHB PE=1 SV=1;	TRUE	3	10	10	10	9	8	9	9	8	9	9	8	9	35.9	35.9	35.9	39.233	359	359;350;251	0	81.881	By MS/MS	By MS/MS	By MS/MS	0.64536	1.1916	21.104	28	13	Leave out requantified	0.67068	0.96207	20.668	28	13	Leave out requantified	1.0376	0.95476	24.638	28	13
E5RHH7;E5RHT6;F8W1U7;F8VWH9;Q8N6T3	E5RHH7;E5RHT6;F8W1U7;F8VWH9;Q8N6T3	1;1;1;1;1	1;1;1;1;1	1;1;1;1;1	ADP-ribosylation factor GTPase-activating protein 1	ARFGAP1	tr|E5RHH7|E5RHH7_HUMAN ADP-ribosylation factor GTPase-activating protein 1 (Fragment) OS=Homo sapiens OX=9606 GN=ARFGAP1 PE=1 SV=1;tr|E5RHT6|E5RHT6_HUMAN ADP-ribosylation factor GTPase-activating protein 1 (Fragment) OS=Homo sapiens OX=9606 GN=ARFGAP1 PE=1	TRUE	5	1	1	1	1	1	1	1	1	1	1	1	1	9.8	9.8	9.8	16.436	153	153;244;271;340;406	0.00035932	3.4517	By MS/MS	By MS/MS	By MS/MS	0.40504	0.63518	5.0995	2	1	Median	0.60155	0.8536	10.289	2	1	Median	1.4584	1.2961	12.386	2	1
P26196;Q8IV96	P26196	8;3	8;3	8;3	Probable ATP-dependent RNA helicase DDX6	DDX6	sp|P26196|DDX6_HUMAN Probable ATP-dependent RNA helicase DDX6 OS=Homo sapiens OX=9606 GN=DDX6 PE=1 SV=2	TRUE	2	8	8	8	7	7	7	7	7	7	7	7	7	26.3	26.3	26.3	54.416	483	483;187	0	63.353	By MS/MS	By MS/MS	By MS/MS	0.6099	1.1256	22.48	23	5	Leave out requantified	0.76351	1.1435	27.32	23	5	Leave out requantified	1.1912	1.0833	28.905	23	5
E5RJI3;E5RIU9;Q8WUX9	E5RJI3;E5RIU9;Q8WUX9	1;1;1	1;1;1	1;1;1	Charged multivesicular body protein 7	CHMP7	tr|E5RJI3|E5RJI3_HUMAN Charged multivesicular body protein 7 OS=Homo sapiens OX=9606 GN=CHMP7 PE=1 SV=1;tr|E5RIU9|E5RIU9_HUMAN Charged multivesicular body protein 7 (Fragment) OS=Homo sapiens OX=9606 GN=CHMP7 PE=1 SV=1;sp|Q8WUX9|CHMP7_HUMAN Charged multive	TRUE	3	1	1	1	1	1	1	1	1	1	1	1	1	10.8	10.8	10.8	17.812	157	157;209;453	0.0074051	1.8643	By MS/MS	By matching	By matching	0.49172	0.98027	46.167	3	0	Plateau	0.6667	1.043	13.548	3	0	Plateau	1.4404	1.3689	41.347	2	0
P50995;H0Y6E1;E5RIN3;P27216	P50995	17;6;1;1	17;6;1;1	17;6;1;1	Annexin A11	ANXA11	sp|P50995|ANX11_HUMAN Annexin A11 OS=Homo sapiens OX=9606 GN=ANXA11 PE=1 SV=1	TRUE	4	17	17	17	16	15	16	16	15	16	16	15	16	32.7	32.7	32.7	54.389	505	505;148;113;316	0	90.561	By MS/MS	By MS/MS	By MS/MS	0.66295	1.1606	25.851	60	17	Leave out requantified	0.7781	1.247	13.591	60	17	Leave out requantified	1.1335	1.0568	12.597	60	17
Q9BYD1;E5RJI7;H0YAX3	Q9BYD1;E5RJI7	3;3;1	3;3;1	3;3;1	39S ribosomal protein L13, mitochondrial	MRPL13	sp|Q9BYD1|RM13_HUMAN 39S ribosomal protein L13, mitochondrial OS=Homo sapiens OX=9606 GN=MRPL13 PE=1 SV=1;tr|E5RJI7|E5RJI7_HUMAN 39S ribosomal protein L13, mitochondrial (Fragment) OS=Homo sapiens OX=9606 GN=MRPL13 PE=1 SV=8	TRUE	3	3	3	3	3	1	0	3	1	0	3	1	0	24.2	24.2	24.2	20.692	178	178;147;47	0	5.4429	By MS/MS	By MS/MS		0.41236	0.6864	39.453	4	3	Median	0.47857	0.80085	43.82	3	2	Median	1.078	1.0188	9.4634	3	2
E5RJR5;P63208	E5RJR5;P63208	1;1	1;1	1;1	S-phase kinase-associated protein 1	SKP1	tr|E5RJR5|E5RJR5_HUMAN S-phase kinase-associated protein 1 OS=Homo sapiens OX=9606 GN=SKP1 PE=1 SV=1;sp|P63208|SKP1_HUMAN S-phase kinase-associated protein 1 OS=Homo sapiens OX=9606 GN=SKP1 PE=1 SV=2	TRUE	2	1	1	1	1	1	1	1	1	1	1	1	1	7.4	7.4	7.4	18.72	163	163;163	0	14.638	By MS/MS	By MS/MS	By MS/MS	0.46359	0.92081	6.2163	2	1	Median	0.57644	1.117	5.3609	2	1	Median	1.3094	1.2672	3.3423	2	1
E5RK69;H0YC77	E5RK69	26;3	1;0	1;0	Annexin	ANXA6	tr|E5RK69|E5RK69_HUMAN Annexin OS=Homo sapiens OX=9606 GN=ANXA6 PE=1 SV=1	TRUE	2	26	1	1	21	23	25	0	1	1	0	1	1	55.7	3	3	51.776	460	460;91	1	-2	By matching	By MS/MS	By MS/MS	0.52656	0.81988	20.302	2	2	Median	0.79578	1.0558	13.208	2	2	Median	1.5113	1.2733	6.6631	2	2
E7ESK6;E9PBI9;P34741;E5RJB8;E5RHU3	E7ESK6;E9PBI9;P34741;E5RJB8;E5RHU3	3;3;3;2;2	3;3;3;2;2	3;3;3;2;2	Syndecan;Syndecan-2	SDC2	tr|E7ESK6|E7ESK6_HUMAN Syndecan OS=Homo sapiens OX=9606 GN=SDC2 PE=1 SV=1;tr|E9PBI9|E9PBI9_HUMAN Syndecan OS=Homo sapiens OX=9606 GN=SDC2 PE=1 SV=1;sp|P34741|SDC2_HUMAN Syndecan-2 OS=Homo sapiens OX=9606 GN=SDC2 PE=1 SV=2;tr|E5RJB8|E5RJB8_HUMAN Syndecan-2	TRUE	5	3	3	3	3	3	2	3	3	2	3	3	2	15.2	15.2	15.2	18.388	165	165;172;201;137;145	0	18.53	By MS/MS	By MS/MS	By MS/MS	0.496	0.8133	24.087	8	5	Median	0.6685	0.98557	43.307	7	4	Median	1.2939	1.0799	35.576	7	4
P54577;A0A0C4DGZ5	P54577;A0A0C4DGZ5	30;22	30;22	30;22	Tyrosine--tRNA ligase, cytoplasmic;Tyrosine--tRNA ligase, cytoplasmic, N-terminally processed;Tyrosine--tRNA ligase	YARS	sp|P54577|SYYC_HUMAN Tyrosine--tRNA ligase, cytoplasmic OS=Homo sapiens OX=9606 GN=YARS PE=1 SV=4;tr|A0A0C4DGZ5|A0A0C4DGZ5_HUMAN Tyrosine--tRNA ligase OS=Homo sapiens OX=9606 GN=YARS PE=1 SV=1	TRUE	2	30	30	30	25	22	25	25	22	25	25	22	25	54.9	54.9	54.9	59.143	528	528;388	0	135.01	By MS/MS	By MS/MS	By MS/MS	0.61549	0.97941	26.825	87	29	Leave out requantified	0.82122	1.1988	17.134	87	29	Leave out requantified	1.2657	1.1739	25.573	86	29
Q14764;H3BQK6;H3BRL2;H3BUK7;H3BNF6;H3BP76;H3BPZ2;H3BNF2;H3BUP3;H3BQE7;I3L155	Q14764	31;7;6;4;4;3;2;2;2;2;1	31;7;6;4;4;3;2;2;2;2;1	31;7;6;4;4;3;2;2;2;2;1	Major vault protein	MVP	sp|Q14764|MVP_HUMAN Major vault protein OS=Homo sapiens OX=9606 GN=MVP PE=1 SV=4	TRUE	11	31	31	31	24	23	23	24	23	23	24	23	23	45.2	45.2	45.2	99.326	893	893;220;148;107;144;94;39;42;57;81;61	0	182.51	By MS/MS	By MS/MS	By MS/MS	0.57737	1.0539	16.159	75	32	Leave out requantified	0.82747	1.3906	15.62	76	32	Leave out requantified	1.3324	1.2778	14.384	76	32
E7EMK3;J3QLD9;Q14254	E7EMK3;J3QLD9;Q14254	1;1;1	1;1;1	1;1;1	Flotillin-2	FLOT2	tr|E7EMK3|E7EMK3_HUMAN Flotillin-2 OS=Homo sapiens OX=9606 GN=FLOT2 PE=1 SV=1;tr|J3QLD9|J3QLD9_HUMAN Flotillin-2 OS=Homo sapiens OX=9606 GN=FLOT2 PE=1 SV=1;sp|Q14254|FLOT2_HUMAN Flotillin-2 OS=Homo sapiens OX=9606 GN=FLOT2 PE=1 SV=2	TRUE	3	1	1	1	0	0	1	0	0	1	0	0	1	4.1	4.1	4.1	53.137	483	483;428;428	0.0019782	2.4933			By MS/MS	NaN	NaN	NaN	1	1	Median	NaN	NaN	NaN	0	0	Median	NaN	NaN	NaN	0	0
P46087;F5H5X6;F5GYR3	P46087	5;1;1	5;1;1	5;1;1	Probable 28S rRNA (cytosine(4447)-C(5))-methyltransferase	NOP2	sp|P46087|NOP2_HUMAN Probable 28S rRNA (cytosine(4447)-C(5))-methyltransferase OS=Homo sapiens OX=9606 GN=NOP2 PE=1 SV=2	TRUE	3	5	5	5	2	3	3	2	3	3	2	3	3	8.4	8.4	8.4	89.301	812	812;250;275	0	9.3132	By MS/MS	By MS/MS	By MS/MS	0.62853	0.93422	3.6432	7	3	Leave out requantified	0.6216	0.87603	25.266	7	3	Leave out requantified	1.3587	1.3505	0.8764	7	3
P38919;I3L3H2	P38919;I3L3H2	20;18	18;16	18;16	Eukaryotic initiation factor 4A-III;Eukaryotic initiation factor 4A-III, N-terminally processed	EIF4A3	sp|P38919|IF4A3_HUMAN Eukaryotic initiation factor 4A-III OS=Homo sapiens OX=9606 GN=EIF4A3 PE=1 SV=4;tr|I3L3H2|I3L3H2_HUMAN Eukaryotic initiation factor 4A-III OS=Homo sapiens OX=9606 GN=EIF4A3 PE=1 SV=2	TRUE	2	20	18	18	18	18	15	16	16	13	16	16	13	47.9	42.1	42.1	46.871	411	411;390	0	68.799	By MS/MS	By MS/MS	By MS/MS	0.52354	0.92351	16.707	50	11	Leave out requantified	0.63008	0.98267	13.616	50	11	Leave out requantified	1.1645	1.0695	18.277	50	11
Q9Y617	Q9Y617	8	8	8	Phosphoserine aminotransferase	PSAT1	sp|Q9Y617|SERC_HUMAN Phosphoserine aminotransferase OS=Homo sapiens OX=9606 GN=PSAT1 PE=1 SV=2	TRUE	1	8	8	8	8	6	7	8	6	7	8	6	7	24.6	24.6	24.6	40.422	370	370	0	24.555	By MS/MS	By MS/MS	By MS/MS	0.6325	1.0141	28.852	20	9	Leave out requantified	1.4473	1.9259	25.001	20	9	Leave out requantified	1.9542	1.8161	22.989	20	9
Q9BXP5;H7C3A1;A0A0A0MSP6	Q9BXP5;H7C3A1	10;8;1	10;8;1	10;8;1	Serrate RNA effector molecule homolog	SRRT	sp|Q9BXP5|SRRT_HUMAN Serrate RNA effector molecule homolog OS=Homo sapiens OX=9606 GN=SRRT PE=1 SV=1;tr|H7C3A1|H7C3A1_HUMAN Serrate RNA effector molecule homolog (Fragment) OS=Homo sapiens OX=9606 GN=SRRT PE=1 SV=1	TRUE	3	10	10	10	8	9	6	8	9	6	8	9	6	15.8	15.8	15.8	100.67	876	876;499;148	0	35.313	By MS/MS	By MS/MS	By MS/MS	0.4947	0.88433	11.806	25	15	Leave out requantified	0.58742	0.94923	22.596	25	15	Leave out requantified	1.0396	0.96524	7.2302	25	15
A0A087X271;B4DDF4;B4DUT8;Q99439;K7ES69;A0A087X1X5;H3BVI6;A0A087WV51;H3BQH0	A0A087X271;B4DDF4;B4DUT8;Q99439;K7ES69;A0A087X1X5;H3BVI6	6;6;6;6;4;3;3;1;1	6;6;6;6;4;3;3;1;1	6;6;6;6;4;3;3;1;1	Calponin;Calponin-2	CNN2	tr|A0A087X271|A0A087X271_HUMAN Calponin (Fragment) OS=Homo sapiens OX=9606 GN=CNN2 PE=1 SV=1;tr|B4DDF4|B4DDF4_HUMAN Calponin OS=Homo sapiens OX=9606 GN=CNN2 PE=1 SV=1;tr|B4DUT8|B4DUT8_HUMAN Calponin OS=Homo sapiens OX=9606 GN=CNN2 PE=1 SV=1;sp|Q99439|CNN2_	TRUE	9	6	6	6	6	5	6	6	5	6	6	5	6	44.7	44.7	44.7	19.757	179	179;298;330;309;148;191;218;66;154	0	212.3	By MS/MS	By MS/MS	By MS/MS	0.58243	0.87225	18.731	20	1	Leave out requantified	0.56235	0.77068	22.377	20	1	Leave out requantified	0.95913	0.87004	10.733	20	1
E7EPN9;Q9Y520;A0A0A0MS30;A0A2R8Y7F4;A0A2R8YET2;H7C5N8	E7EPN9;Q9Y520	4;4;1;1;1;1	4;4;1;1;1;1	4;4;1;1;1;1	Protein PRRC2C	PRRC2C	tr|E7EPN9|E7EPN9_HUMAN Protein PRRC2C OS=Homo sapiens OX=9606 GN=PRRC2C PE=1 SV=1;sp|Q9Y520|PRC2C_HUMAN Protein PRRC2C OS=Homo sapiens OX=9606 GN=PRRC2C PE=1 SV=4	TRUE	6	4	4	4	2	2	2	2	2	2	2	2	2	2.8	2.8	2.8	308.77	2819	2819;2896;299;910;1090;1300	0	7.0991	By MS/MS	By MS/MS	By MS/MS	0.74773	1.1445	27.469	4	3	Median	0.96217	1.2296	19.691	4	3	Median	1.1004	0.99331	26.482	4	3
E7EPT4;P19404	E7EPT4;P19404	1;1	1;1	1;1	NADH dehydrogenase [ubiquinone] flavoprotein 2, mitochondrial	NDUFV2	tr|E7EPT4|E7EPT4_HUMAN NADH dehydrogenase [ubiquinone] flavoprotein 2, mitochondrial OS=Homo sapiens OX=9606 GN=NDUFV2 PE=1 SV=1;sp|P19404|NDUV2_HUMAN NADH dehydrogenase [ubiquinone] flavoprotein 2, mitochondrial OS=Homo sapiens OX=9606 GN=NDUFV2 PE=1 SV=2	TRUE	2	1	1	1	1	1	1	1	1	1	1	1	1	4	4	4	27.907	252	252;249	0.0091047	1.764	By MS/MS	By MS/MS	By MS/MS	1.2984	1.8381	43.501	4	4	Median	0.99212	1.2329	19.958	4	4	Linear	0.74999	0.68131	27.884	4	4
Q8WWQ0;H7C409;H7BZR9;Q9NSI6	Q8WWQ0	4;1;1;1	4;1;1;1	4;1;1;1	PH-interacting protein	PHIP	sp|Q8WWQ0|PHIP_HUMAN PH-interacting protein OS=Homo sapiens OX=9606 GN=PHIP PE=1 SV=2	TRUE	4	4	4	4	3	2	0	3	2	0	3	2	0	3.8	3.8	3.8	206.69	1821	1821;452;640;2320	0	5.991	By MS/MS	By MS/MS		0.47752	0.87309	46.427	5	4	Median	0.29151	1.1996	60.024	4	3	Linear	1.1285	1.1323	98.4	4	3
Q9HCN8	Q9HCN8	3	3	3	Stromal cell-derived factor 2-like protein 1	SDF2L1	sp|Q9HCN8|SDF2L_HUMAN Stromal cell-derived factor 2-like protein 1 OS=Homo sapiens OX=9606 GN=SDF2L1 PE=1 SV=2	TRUE	1	3	3	3	2	3	2	2	3	2	2	3	2	28.1	28.1	28.1	23.598	221	221	0	11.785	By MS/MS	By MS/MS	By MS/MS	0.75281	1.1829	5.5541	6	0	Leave out requantified	0.84669	1.1641	1.958	6	0	Leave out requantified	1.1692	1.014	9.0231	6	0
O14828	O14828	8	8	8	Secretory carrier-associated membrane protein 3	SCAMP3	sp|O14828|SCAM3_HUMAN Secretory carrier-associated membrane protein 3 OS=Homo sapiens OX=9606 GN=SCAMP3 PE=1 SV=3	TRUE	1	8	8	8	6	6	4	6	6	4	6	6	4	28.2	28.2	28.2	38.287	347	347	0	61.974	By MS/MS	By MS/MS	By MS/MS	0.59555	0.92739	19.769	17	7	Leave out requantified	0.5943	0.82004	20.953	16	6	Leave out requantified	0.92901	0.92475	21.024	16	6
E7EQI7;Q12768	E7EQI7;Q12768	2;2	2;2	2;2	WASH complex subunit strumpellin	KIAA0196	tr|E7EQI7|E7EQI7_HUMAN WASH complex subunit 5 OS=Homo sapiens OX=9606 GN=WASHC5 PE=1 SV=1;sp|Q12768|WASC5_HUMAN WASH complex subunit 5 OS=Homo sapiens OX=9606 GN=WASHC5 PE=1 SV=1	TRUE	2	2	2	2	0	2	2	0	2	2	0	2	2	3.1	3.1	3.1	117.06	1011	1011;1159	0.00070472	3.1906		By MS/MS	By MS/MS	0.64904	1.1928	4.1076	3	3	Plateau	1.1187	1.7216	18.617	3	3	Plateau	1.7236	1.4458	24.492	3	3
E7EQU2;E7EV09;E7EQL5;E9PGG1;E7ETL8;E7ESD3;E7EMU4;E7EUM4;E7ERR6;E7ERH4;E7ET01;E7EU01	E7EQU2;E7EV09;E7EQL5;E9PGG1;E7ETL8;E7ESD3;E7EMU4;E7EUM4;E7ERR6;E7ERH4;E7ET01	5;5;5;4;4;4;4;3;3;3;3;2	1;1;1;1;1;0;0;0;0;0;0;0	1;1;1;1;1;0;0;0;0;0;0;0		DYNC1I2	tr|E7EQU2|E7EQU2_HUMAN Cytoplasmic dynein 1 intermediate chain 2 (Fragment) OS=Homo sapiens OX=9606 GN=DYNC1I2 PE=1 SV=1;tr|E7EV09|E7EV09_HUMAN Cytoplasmic dynein 1 intermediate chain 2 (Fragment) OS=Homo sapiens OX=9606 GN=DYNC1I2 PE=1 SV=8;tr|E7EQL5|E7EQ	TRUE	12	5	1	1	4	4	5	1	0	1	1	0	1	52.4	14.6	14.6	20.756	185	185;250;305;110;184;187;214;137;139;151;173;121	0	6.9413	By MS/MS	By matching	By MS/MS	0.67659	0.98791	9.7436	2	0	Median	0.46015	0.59502	48.654	2	0	Median	0.71357	0.63944	43.611	2	0
P43686	P43686	16	16	13	26S protease regulatory subunit 6B	PSMC4	sp|P43686|PRS6B_HUMAN 26S proteasome regulatory subunit 6B OS=Homo sapiens OX=9606 GN=PSMC4 PE=1 SV=2	TRUE	1	16	16	13	14	15	14	14	15	14	12	12	11	37.1	37.1	31.8	47.366	418	418	0	84.572	By MS/MS	By MS/MS	By MS/MS	0.56926	0.91146	18.237	53	11	Leave out requantified	0.68351	1.014	21.656	53	11	Leave out requantified	1.1702	1.0625	8.9337	53	11
Q9H1C4	Q9H1C4	2	2	2	Protein unc-93 homolog B1	UNC93B1	sp|Q9H1C4|UN93B_HUMAN Protein unc-93 homolog B1 OS=Homo sapiens OX=9606 GN=UNC93B1 PE=1 SV=2	TRUE	1	2	2	2	2	2	2	2	2	2	2	2	2	5	5	5	66.63	597	597	0	25.358	By MS/MS	By MS/MS	By MS/MS	0.53184	0.86549	15.653	6	0	Leave out requantified	0.65998	1.1172	9.4267	6	0	Leave out requantified	1.1425	1.0558	7.852	6	0
A0A0A0MTC1;A0A0A0MTR7;Q63HN8	A0A0A0MTC1;A0A0A0MTR7;Q63HN8	25;25;25	25;25;25	25;25;25	E3 ubiquitin-protein ligase RNF213	RNF213	tr|A0A0A0MTC1|A0A0A0MTC1_HUMAN E3 ubiquitin-protein ligase RNF213 OS=Homo sapiens OX=9606 GN=RNF213 PE=1 SV=1;tr|A0A0A0MTR7|A0A0A0MTR7_HUMAN E3 ubiquitin-protein ligase RNF213 OS=Homo sapiens OX=9606 GN=RNF213 PE=1 SV=1;sp|Q63HN8|RN213_HUMAN E3 ubiquitin-p	TRUE	3	25	25	25	15	16	18	15	16	18	15	16	18	6	6	6	596.48	5256	5256;5207;5207	0	74.666	By MS/MS	By MS/MS	By MS/MS	0.604	0.95695	27.043	43	15	Leave out requantified	0.80819	1.5128	12.306	43	15	Leave out requantified	1.4447	1.3359	25.751	43	15
O94973;A0A0G2JS82;A0A0G2JQM1;E9PR62;A0A0G2JRF9;A0A0G2JQA4;A0A0G2JRS3;E9PQP4;E9PNC4;A0A0G2JS17;A0A0G2JQT9;H0YDE9;H0YEG0;M0R2D9	O94973;A0A0G2JS82;A0A0G2JQM1	16;15;10;5;4;4;3;2;2;2;2;2;2;1	11;11;6;4;4;4;3;2;2;2;2;2;2;0	11;11;6;4;4;4;3;2;2;2;2;2;2;0	AP-2 complex subunit alpha-2	AP2A2	sp|O94973|AP2A2_HUMAN AP-2 complex subunit alpha-2 OS=Homo sapiens OX=9606 GN=AP2A2 PE=1 SV=2;tr|A0A0G2JS82|A0A0G2JS82_HUMAN AP-2 complex subunit alpha-2 (Fragment) OS=Homo sapiens OX=9606 GN=AP2A2 PE=1 SV=1;tr|A0A0G2JQM1|A0A0G2JQM1_HUMAN AP-2 complex subu	TRUE	14	16	11	11	13	10	11	8	5	6	8	5	6	24.1	17.8	17.8	103.96	939	939;917;634;378;356;356;140;90;125;156;173;184;185;57	0	58.517	By MS/MS	By MS/MS	By MS/MS	0.6399	0.95305	19.248	17	8	Leave out requantified	0.98978	1.3909	20.459	17	8	Leave out requantified	1.2126	1.0831	14.538	16	8
E7ERS3;Q86VM9	E7ERS3;Q86VM9	1;1	1;1	1;1	Zinc finger CCCH domain-containing protein 18	ZC3H18	tr|E7ERS3|E7ERS3_HUMAN Zinc finger CCCH domain-containing protein 18 OS=Homo sapiens OX=9606 GN=ZC3H18 PE=1 SV=1;sp|Q86VM9|ZCH18_HUMAN Zinc finger CCCH domain-containing protein 18 OS=Homo sapiens OX=9606 GN=ZC3H18 PE=1 SV=2	TRUE	2	1	1	1	1	0	0	1	0	0	1	0	0	1.3	1.3	1.3	108.94	977	977;953	0.0071141	1.8816	By MS/MS			NaN	NaN	NaN	1	1	Median	NaN	NaN	NaN	1	1	Median	NaN	NaN	NaN	1	1
P35270	P35270	3	3	3	Sepiapterin reductase	SPR	sp|P35270|SPRE_HUMAN Sepiapterin reductase OS=Homo sapiens OX=9606 GN=SPR PE=1 SV=1	TRUE	1	3	3	3	3	2	2	3	2	2	3	2	2	19.9	19.9	19.9	28.048	261	261	0	37.639	By MS/MS	By MS/MS	By MS/MS	0.49737	0.86031	13.014	10	3	Leave out requantified	0.47271	0.7579	22.286	10	3	Leave out requantified	0.96926	0.87191	3.9835	10	3
O75340;A0A024QZ42;H0Y9X3;A0A087WZ38	O75340;A0A024QZ42	4;3;1;1	4;3;1;1	4;3;1;1	Programmed cell death protein 6	PDCD6	sp|O75340|PDCD6_HUMAN Programmed cell death protein 6 OS=Homo sapiens OX=9606 GN=PDCD6 PE=1 SV=1;tr|A0A024QZ42|A0A024QZ42_HUMAN HCG1985580, isoform CRA_c OS=Homo sapiens OX=9606 GN=PDCD6 PE=1 SV=1	TRUE	4	4	4	4	4	4	4	4	4	4	4	4	4	23.6	23.6	23.6	21.868	191	191;121;104;123	0	12.941	By MS/MS	By MS/MS	By MS/MS	0.4198	0.83393	5.3916	13	5	Leave out requantified	0.49242	0.90449	35.762	13	5	Leave out requantified	1.1372	1.1153	16.472	13	5
E7ET49;Q8NCG7	E7ET49;Q8NCG7	1;1	1;1	1;1	Sn1-specific diacylglycerol lipase beta	DAGLB	tr|E7ET49|E7ET49_HUMAN Sn1-specific diacylglycerol lipase beta OS=Homo sapiens OX=9606 GN=DAGLB PE=1 SV=1;sp|Q8NCG7|DGLB_HUMAN Sn1-specific diacylglycerol lipase beta OS=Homo sapiens OX=9606 GN=DAGLB PE=1 SV=2	TRUE	2	1	1	1	1	1	0	1	1	0	1	1	0	2.9	2.9	2.9	68.951	631	631;672	0	7.7861	By MS/MS	By MS/MS		0.49111	0.89216	12.857	2	1	Median	0.44786	0.79	1.4164	2	1	Median	0.96763	0.96204	14.443	2	1
P26358;K7ENW7	P26358	5;1	5;1	5;1	DNA (cytosine-5)-methyltransferase 1	DNMT1	sp|P26358|DNMT1_HUMAN DNA (cytosine-5)-methyltransferase 1 OS=Homo sapiens OX=9606 GN=DNMT1 PE=1 SV=2	TRUE	2	5	5	5	2	4	2	2	4	2	2	4	2	4.5	4.5	4.5	183.16	1616	1616;389	0	7.6723	By MS/MS	By MS/MS	By MS/MS	0.58849	0.91855	31.581	7	7	Plateau	0.51178	0.86482	27.981	7	7	Median	1.039	0.9431	11.686	7	7
A0A1W2PNW1;P42226;G3V2X7;H0YJH6;Q5FBW6;G3V2L2;G3V2M3;G3V3E9;G3V2H4;G3V5I8;G3V568;G3V370;G3V5K5	A0A1W2PNW1;P42226;G3V2X7;H0YJH6	5;5;4;3;1;1;1;1;1;1;1;1;1	5;5;4;3;1;1;1;1;1;1;1;1;1	5;5;4;3;1;1;1;1;1;1;1;1;1	Signal transducer and activator of transcription 6	STAT6	tr|A0A1W2PNW1|A0A1W2PNW1_HUMAN Signal transducer and activator of transcription OS=Homo sapiens OX=9606 GN=STAT6 PE=1 SV=1;sp|P42226|STAT6_HUMAN Signal transducer and activator of transcription 6 OS=Homo sapiens OX=9606 GN=STAT6 PE=1 SV=1;tr|G3V2X7|G3V2X7_	TRUE	13	5	5	5	4	4	5	4	4	5	4	4	5	9.3	9.3	9.3	76.077	679	679;847;154;290;38;64;74;103;104;141;144;154;159	0	10.911	By MS/MS	By MS/MS	By MS/MS	0.55466	1.0793	29.067	13	6	Leave out requantified	0.66997	1.5129	16.225	13	6	Leave out requantified	1.4155	1.1819	21.878	13	6
P54578;A6NJA2	P54578;A6NJA2	10;9	10;9	10;9	Ubiquitin carboxyl-terminal hydrolase 14;Ubiquitin carboxyl-terminal hydrolase	USP14	sp|P54578|UBP14_HUMAN Ubiquitin carboxyl-terminal hydrolase 14 OS=Homo sapiens OX=9606 GN=USP14 PE=1 SV=3;tr|A6NJA2|A6NJA2_HUMAN Ubiquitin carboxyl-terminal hydrolase 14 OS=Homo sapiens OX=9606 GN=USP14 PE=1 SV=2	TRUE	2	10	10	10	7	6	7	7	6	7	7	6	7	26.5	26.5	26.5	56.068	494	494;448	0	48.72	By MS/MS	By MS/MS	By MS/MS	0.68971	1.14	30.055	21	7	Leave out requantified	0.65756	0.91167	13.313	20	6	Leave out requantified	1.0513	0.85985	26.303	20	6
P51610;A6NEM2;H7C1C4	P51610;A6NEM2	7;7;1	7;7;1	7;7;1	Host cell factor 1;HCF N-terminal chain 1;HCF N-terminal chain 2;HCF N-terminal chain 3;HCF N-terminal chain 4;HCF N-terminal chain 5;HCF N-terminal chain 6;HCF C-terminal chain 1;HCF C-terminal chain 2;HCF C-terminal chain 3;HCF C-terminal chain 4;HCF C-terminal chain 5;HCF C-terminal chain 6	HCFC1	sp|P51610|HCFC1_HUMAN Host cell factor 1 OS=Homo sapiens OX=9606 GN=HCFC1 PE=1 SV=2;tr|A6NEM2|A6NEM2_HUMAN Host cell factor 1 OS=Homo sapiens OX=9606 GN=HCFC1 PE=1 SV=2	TRUE	3	7	7	7	5	4	6	5	4	6	5	4	6	4.8	4.8	4.8	208.73	2035	2035;2080;611	0	38.207	By MS/MS	By MS/MS	By MS/MS	0.60583	1.0808	11.9	20	12	Leave out requantified	0.58472	0.9649	9.0896	20	12	Leave out requantified	0.95279	0.91296	26.061	20	12
P50454;E9PR70;E9PPV6;E9PKH2;E9PK86;E9PMI5;E9PNX1;E9PJH8;E9PIG2;E9PRS3;H0YEP8;E9PLA6;E9PQ34	P50454;E9PR70;E9PPV6;E9PKH2	17;13;13;10;8;8;6;4;4;4;2;2;2	17;13;13;10;8;8;6;4;4;4;2;2;2	17;13;13;10;8;8;6;4;4;4;2;2;2	Serpin H1	SERPINH1	sp|P50454|SERPH_HUMAN Serpin H1 OS=Homo sapiens OX=9606 GN=SERPINH1 PE=1 SV=2;tr|E9PR70|E9PR70_HUMAN Serpin H1 (Fragment) OS=Homo sapiens OX=9606 GN=SERPINH1 PE=1 SV=1;tr|E9PPV6|E9PPV6_HUMAN Serpin H1 OS=Homo sapiens OX=9606 GN=SERPINH1 PE=1 SV=1;tr|E9PKH2	TRUE	13	17	17	17	17	17	16	17	17	16	17	17	16	54.8	54.8	54.8	46.44	418	418;295;324;201;247;249;203;150;165;166;56;85;142	0	147.27	By MS/MS	By MS/MS	By MS/MS	0.45654	0.79205	14.17	71	25	Leave out requantified	0.64796	1.1655	18.595	71	25	Leave out requantified	1.5374	1.4557	13.66	71	25
E7EVJ5;H7C229;Q96F07;E7EW33;A0A087WVE1;A0A087WTQ3;A0A087WWZ1;H0YL50;A0A087WV63;A0A0G2JRF5;A0A087WWY5;A0A087WZL7	E7EVJ5;H7C229;Q96F07;E7EW33	11;9;9;8;4;4;4;2;1;1;1;1	1;0;1;0;1;1;1;0;0;0;0;0	1;0;1;0;1;1;1;0;0;0;0;0	Cytoplasmic FMR1-interacting protein 2	CYFIP2	tr|E7EVJ5|E7EVJ5_HUMAN Cytoplasmic FMR1-interacting protein OS=Homo sapiens OX=9606 GN=CYFIP2 PE=1 SV=1;tr|H7C229|H7C229_HUMAN Cytoplasmic FMR1-interacting protein 2 OS=Homo sapiens OX=9606 GN=CYFIP2 PE=1 SV=2;sp|Q96F07|CYFP2_HUMAN Cytoplasmic FMR1-interac	TRUE	12	11	1	1	9	11	5	1	1	0	1	1	0	9.5	1.1	1.1	142.58	1227	1227;1117;1278;1057;188;222;295;176;71;77;77;101	0.0010406	2.9963	By MS/MS	By MS/MS	By matching	0.65574	0.98933	48.021	2	2	Median	0.70909	0.97268	46.994	2	2	Median	1.0814	1.0254	2.0785	2	2
Q29RF7;H0Y9L6	Q29RF7	5;2	5;2	5;2	Sister chromatid cohesion protein PDS5 homolog A	PDS5A	sp|Q29RF7|PDS5A_HUMAN Sister chromatid cohesion protein PDS5 homolog A OS=Homo sapiens OX=9606 GN=PDS5A PE=1 SV=1	TRUE	2	5	5	5	2	4	4	2	4	4	2	4	4	7.2	7.2	7.2	150.83	1337	1337;126	0	18.427	By MS/MS	By MS/MS	By MS/MS	0.55835	1.327	17.018	9	9	Linear	0.59503	0.97106	37.114	9	9	Median	1.0832	1.1421	45.109	9	9
Q14444;E9PLA9;G3V153	Q14444;E9PLA9;G3V153	10;8;8	10;8;8	10;8;8	Caprin-1	CAPRIN1	sp|Q14444|CAPR1_HUMAN Caprin-1 OS=Homo sapiens OX=9606 GN=CAPRIN1 PE=1 SV=2;tr|E9PLA9|E9PLA9_HUMAN Caprin-1 (Fragment) OS=Homo sapiens OX=9606 GN=CAPRIN1 PE=1 SV=1;tr|G3V153|G3V153_HUMAN Caprin-1 OS=Homo sapiens OX=9606 GN=CAPRIN1 PE=1 SV=1	TRUE	3	10	10	10	6	8	8	6	8	8	6	8	8	17.9	17.9	17.9	78.365	709	709;186;628	0	47.778	By MS/MS	By MS/MS	By MS/MS	0.52032	0.88689	16.159	22	5	Leave out requantified	0.70261	0.99414	16.891	22	5	Leave out requantified	1.1381	1.0524	9.6838	22	5
E7EWP0;H0Y886;O43674	E7EWP0;H0Y886;O43674	1;1;1	1;1;1	1;1;1	NADH dehydrogenase [ubiquinone] 1 beta subcomplex subunit 5, mitochondrial	NDUFB5	tr|E7EWP0|E7EWP0_HUMAN NADH dehydrogenase [ubiquinone] 1 beta subcomplex subunit 5, mitochondrial OS=Homo sapiens OX=9606 GN=NDUFB5 PE=1 SV=1;tr|H0Y886|H0Y886_HUMAN NADH dehydrogenase [ubiquinone] 1 beta subcomplex subunit 5, mitochondrial (Fragment) OS=Ho	TRUE	3	1	1	1	1	1	1	1	1	1	1	1	1	8.5	8.5	8.5	20.038	177	177;206;189	0	4.6058	By MS/MS	By MS/MS	By MS/MS	0.58906	1.1539	19.597	3	0	Plateau	0.49168	0.88103	27.001	3	0	Plateau	0.85918	0.79367	30.832	3	0
A6NFX8;Q9UKK9;A6NJU6;A6NCQ0;C9JYY9;H0YEY4	A6NFX8;Q9UKK9;A6NJU6	5;5;4;2;1;1	5;5;4;2;1;1	5;5;4;2;1;1	ADP-sugar pyrophosphatase	NUDT5	tr|A6NFX8|A6NFX8_HUMAN ADP-sugar pyrophosphatase OS=Homo sapiens OX=9606 GN=NUDT5 PE=1 SV=1;sp|Q9UKK9|NUDT5_HUMAN ADP-sugar pyrophosphatase OS=Homo sapiens OX=9606 GN=NUDT5 PE=1 SV=1;tr|A6NJU6|A6NJU6_HUMAN ADP-sugar pyrophosphatase OS=Homo sapiens OX=9606	TRUE	6	5	5	5	5	4	3	5	4	3	5	4	3	25	25	25	25.895	232	232;219;186;180;97;137	0	15.48	By MS/MS	By MS/MS	By MS/MS	0.63474	0.99027	15.327	14	8	Leave out requantified	0.84385	1.1624	22.149	14	8	Leave out requantified	1.301	1.0539	6.3726	14	8
E7EWW9;P09488;B9ZVX7;H3BQT3	E7EWW9;P09488;B9ZVX7;H3BQT3	4;4;3;2	4;4;3;2	1;1;1;1	Glutathione S-transferase Mu 1	GSTM1	tr|E7EWW9|E7EWW9_HUMAN Glutathione S-transferase Mu 1 OS=Homo sapiens OX=9606 GN=GSTM1 PE=1 SV=1;sp|P09488|GSTM1_HUMAN Glutathione S-transferase Mu 1 OS=Homo sapiens OX=9606 GN=GSTM1 PE=1 SV=3;tr|B9ZVX7|B9ZVX7_HUMAN Glutathione S-transferase Mu 1 OS=Homo s	TRUE	4	4	4	1	3	4	3	3	4	3	1	1	1	16.9	16.9	4.2	27.617	237	237;218;149;85	0	9.8814	By MS/MS	By MS/MS	By MS/MS	0.9512	1.3698	37.633	13	8	Leave out requantified	0.28335	0.35109	67.033	13	8	Linear	0.87866	0.7772	34.349	13	8
F8VX11;E7EX17;P23588;F8W0K0;F8VRU1;F8VYE9;F8VSC7;F8VP89	F8VX11;E7EX17;P23588;F8W0K0;F8VRU1;F8VYE9;F8VSC7;F8VP89	2;2;2;1;1;1;1;1	2;2;2;1;1;1;1;1	2;2;2;1;1;1;1;1	Eukaryotic translation initiation factor 4B	EIF4B	tr|F8VX11|F8VX11_HUMAN Eukaryotic translation initiation factor 4B (Fragment) OS=Homo sapiens OX=9606 GN=EIF4B PE=1 SV=1;tr|E7EX17|E7EX17_HUMAN Eukaryotic translation initiation factor 4B OS=Homo sapiens OX=9606 GN=EIF4B PE=1 SV=1;sp|P23588|IF4B_HUMAN Euka	TRUE	8	2	2	2	1	1	2	1	1	2	1	1	2	6.7	6.7	6.7	41.454	360	360;616;611;169;175;185;227;275	0	5.1482	By MS/MS	By MS/MS	By MS/MS	0.44126	0.86788	7.5703	3	0	Median	0.55908	0.9103	8.6136	3	0	Median	1.3126	1.1789	5.7842	3	0
P20700;E9PBF6;A0A0D9SFE5;A0A0D9SFY5	P20700;E9PBF6;A0A0D9SFE5	44;35;27;12	42;33;27;12	39;32;26;11	Lamin-B1	LMNB1	sp|P20700|LMNB1_HUMAN Lamin-B1 OS=Homo sapiens OX=9606 GN=LMNB1 PE=1 SV=2;tr|E9PBF6|E9PBF6_HUMAN Lamin-B1 OS=Homo sapiens OX=9606 GN=LMNB1 PE=1 SV=1;tr|A0A0D9SFE5|A0A0D9SFE5_HUMAN Lamin B1, isoform CRA_a OS=Homo sapiens OX=9606 GN=LMNB1 PE=1 SV=1	TRUE	4	44	42	39	38	38	37	37	37	35	35	35	32	62.5	62.5	58.5	66.408	586	586;387;329;166	0	323.31	By MS/MS	By MS/MS	By MS/MS	0.58855	0.99511	16.517	147	51	Leave out requantified	0.50595	0.82137	19.542	143	47	Leave out requantified	0.85523	0.79843	10.249	141	47
P08311	P08311	7	7	7	Cathepsin G	CTSG	sp|P08311|CATG_HUMAN Cathepsin G OS=Homo sapiens OX=9606 GN=CTSG PE=1 SV=2	TRUE	1	7	7	7	5	6	6	5	6	6	5	6	6	32.2	32.2	32.2	28.837	255	255	0	31.654	By MS/MS	By MS/MS	By MS/MS	1.0763	2.2188	59.38	20	11	Leave out requantified	0.5433	0.71747	41.619	20	11	Leave out requantified	0.52888	0.53451	41.947	20	11
E9B7A8;E9B7A7	E9B7A8	6;2	6;2	6;2			tr|E9B7A8|E9B7A8_LEIDB Ribosomal protein S7, putative OS=Leishmania donovani (strain BPK282A1) GN=LDBPK_010440 PE=4 SV=1	non-human	2	6	6	6	3	5	4	3	5	4	3	5	4	30.5	30.5	30.5	23.816	200	200;97	0	26.762	By MS/MS	By MS/MS	By MS/MS	0.21979	0.38168	35.318	11	10	Median	0.17437	1.2842	82.418	9	8	Linear	0.87078	0.88251	72.85	9	8
E9B7B3	E9B7B3	1	1	1			tr|E9B7B3|E9B7B3_LEIDB Fatty acyl CoA syntetase 1, putative OS=Leishmania donovani (strain BPK282A1) GN=LDBPK_010490 PE=4 SV=1	non-human	1	1	1	1	0	0	1	0	0	1	0	0	1	1.7	1.7	1.7	77.58	696	696	0.0010235	2.8312			By MS/MS	0.48294	0.86529	12.145	2	2	Median	0.28419	0.4904	7.7475	2	2	Median	0.58845	0.56395	4.1143	2	2
E9B7E3	E9B7E3	12	12	12			tr|E9B7E3|E9B7E3_LEIDB Eukaryotic initiation factor 4a, putative OS=Leishmania donovani (strain BPK282A1) GN=LDBPK_010790 PE=3 SV=1	non-human	1	12	12	12	9	11	9	9	11	9	9	11	9	46.9	46.9	46.9	45.326	403	403	0	79.189	By MS/MS	By MS/MS	By MS/MS	0.28623	0.57034	52.417	28	9	Leave out requantified	0.23672	0.4214	39.762	27	8	Leave out requantified	0.84756	0.77406	31.626	27	8
E9B7I1	E9B7I1	3	3	3			tr|E9B7I1|E9B7I1_LEIDB Proteasome regulatory non-ATPase subunit 6, putative OS=Leishmania donovani (strain BPK282A1) GN=LDBPK_020340 PE=4 SV=1	non-human	1	3	3	3	0	0	3	0	0	3	0	0	3	6.8	6.8	6.8	59.002	529	529	0	11.914			By MS/MS	NaN	NaN	NaN	1	1	Median	NaN	NaN	NaN	1	1	Median	NaN	NaN	NaN	1	1
E9B7J0	E9B7J0	7	7	7			tr|E9B7J0|E9B7J0_LEIDB Uncharacterized protein OS=Leishmania donovani (strain BPK282A1) GN=LDBPK_020430 PE=4 SV=1	non-human	1	7	7	7	5	7	7	5	7	7	5	7	7	25.4	25.4	25.4	31.925	291	291	0	22.769	By MS/MS	By MS/MS	By MS/MS	0.21895	0.46381	31.654	12	9	Leave out requantified	0.20869	0.41255	40.465	11	8	Leave out requantified	0.92365	0.87281	14.567	11	8
E9B7J9	E9B7J9	1	1	1			tr|E9B7J9|E9B7J9_LEIDB Uncharacterized protein OS=Leishmania donovani (strain BPK282A1) GN=LDBPK_020520 PE=4 SV=1	non-human	1	1	1	1	0	0	1	0	0	1	0	0	1	5.5	5.5	5.5	17.633	163	163	0.0068557	1.9282			By MS/MS	NaN	NaN	NaN	1	1	Median	NaN	NaN	NaN	1	1	Median	NaN	NaN	NaN	1	1
E9B7L5	E9B7L5	4	4	3			tr|E9B7L5|E9B7L5_LEIDB ATP-dependent Clp protease subunit, heat shock protein 78 (HSP78), putative OS=Leishmania donovani (strain BPK282A1) GN=LDBPK_020680 PE=4 SV=1	non-human	1	4	4	3	1	0	4	1	0	4	1	0	3	7	7	5.4	90.824	817	817	0	10.011	By MS/MS		By MS/MS	0.31629	0.56019	30.048	4	4	Median	0.23342	0.68936	60.721	4	4	Linear	1.361	1.1574	50.079	4	4
E9B7L8	E9B7L8	3	3	3			tr|E9B7L8|E9B7L8_LEIDB Peptidyl-dipeptidase, putative OS=Leishmania donovani (strain BPK282A1) GN=LDBPK_020710 PE=3 SV=1	non-human	1	3	3	3	0	0	3	0	0	3	0	0	3	6.3	6.3	6.3	76.574	678	678	0	4.2969			By MS/MS	0.83815	1.7139	92.525	3	3	Median	0.51161	0.67719	9.8161	2	2	Median	0.52747	0.43795	123.09	2	2
E9B7N7	E9B7N7	10	10	10			tr|E9B7N7|E9B7N7_LEIDB Delta-1-pyrroline-5-carboxylate dehydrogenase, putative OS=Leishmania donovani (strain BPK282A1) GN=LDBPK_030190 PE=3 SV=1	non-human	1	10	10	10	2	7	9	2	7	9	2	7	9	22.9	22.9	22.9	61.94	560	560	0	18.675	By MS/MS	By MS/MS	By MS/MS	0.21019	0.36599	97.207	11	11	Plateau	0.36263	0.63186	118.43	10	10	Median	1.0369	0.91027	143.2	10	10
E9B7P0	E9B7P0	2	2	2			tr|E9B7P0|E9B7P0_LEIDB Long chain fatty Acyl CoA synthetase, putative OS=Leishmania donovani (strain BPK282A1) GN=LDBPK_030220 PE=4 SV=1	non-human	1	2	2	2	0	0	2	0	0	2	0	0	2	3.8	3.8	3.8	79.004	704	704	0.0029441	2.421			By MS/MS	NaN	NaN	NaN	1	1	Median	NaN	NaN	NaN	0	0	Median	NaN	NaN	NaN	0	0
E9B7R0	E9B7R0	2	2	2			tr|E9B7R0|E9B7R0_LEIDB 60S acidic ribosomal protein P2, putative OS=Leishmania donovani (strain BPK282A1) GN=LDBPK_030420 PE=3 SV=1	non-human	1	2	2	2	1	0	2	1	0	2	1	0	2	46.8	46.8	46.8	11.132	111	111	0	4.5853	By MS/MS		By MS/MS	NaN	NaN	NaN	0	0	Median	NaN	NaN	NaN	0	0	Median	NaN	NaN	NaN	0	0
E9B7S0	E9B7S0	2	1	1			tr|E9B7S0|E9B7S0_LEIDB 26S protease regulatory subunit, putative OS=Leishmania donovani (strain BPK282A1) GN=LDBPK_030520 PE=3 SV=1	non-human	1	2	1	1	1	1	2	0	0	1	0	0	1	6.8	3.8	3.8	44.454	396	396	0.0013601	2.7978	By matching	By matching	By MS/MS	NaN	NaN	NaN	1	0	Median	NaN	NaN	NaN	1	0	Median	NaN	NaN	NaN	1	0
E9B7T5	E9B7T5	1	1	1			tr|E9B7T5|E9B7T5_LEIDB Uncharacterized protein OS=Leishmania donovani (strain BPK282A1) GN=LDBPK_030670 PE=4 SV=1	non-human	1	1	1	1	0	0	1	0	0	1	0	0	1	0.8	0.8	0.8	246.69	2209	2209	0	10.435			By MS/MS	NaN	NaN	NaN	1	0	Median	NaN	NaN	NaN	1	0	Median	NaN	NaN	NaN	1	0
E9B7W6	E9B7W6	3	3	3			tr|E9B7W6|E9B7W6_LEIDB Elongation initiation factor 2 alpha subunit, putative OS=Leishmania donovani (strain BPK282A1) GN=LDBPK_030960 PE=4 SV=1	non-human	1	3	3	3	1	0	3	1	0	3	1	0	3	8	8	8	46.639	413	413	0	4.4011	By MS/MS		By MS/MS	0.90739	1.3614	38.087	2	2	Median	NaN	NaN	NaN	1	1	Median	NaN	NaN	NaN	1	1
E9B7X2	E9B7X2	2	2	2			tr|E9B7X2|E9B7X2_LEIDB Uncharacterized protein OS=Leishmania donovani (strain BPK282A1) GN=LDBPK_040060 PE=4 SV=1	non-human	1	2	2	2	0	1	1	0	1	1	0	1	1	3.8	3.8	3.8	58.941	529	529	0.0019802	2.5129		By MS/MS	By MS/MS	NaN	NaN	NaN	1	1	Median	NaN	NaN	NaN	1	1	Median	NaN	NaN	NaN	1	1
E9B7Y9	E9B7Y9	2	2	2			tr|E9B7Y9|E9B7Y9_LEIDB Uncharacterized protein OS=Leishmania donovani (strain BPK282A1) GN=LDBPK_040230 PE=4 SV=1	non-human	1	2	2	2	0	1	2	0	1	2	0	1	2	9	9	9	31.964	290	290	0	5.9144		By MS/MS	By MS/MS	0.41053	0.83257	36.756	2	2	Median	0.71554	1.404	16.958	2	2	Median	1.743	1.7038	46.352	2	2
E9B806	E9B806	2	2	2			tr|E9B806|E9B806_LEIDB Uncharacterized protein OS=Leishmania donovani (strain BPK282A1) GN=LDBPK_040400 PE=4 SV=1	non-human	1	2	2	2	0	0	2	0	0	2	0	0	2	6.1	6.1	6.1	39.159	361	361	0.0019809	2.5195			By MS/MS	NaN	NaN	NaN	1	1	Median	NaN	NaN	NaN	1	1	Median	NaN	NaN	NaN	1	1
E9B840	E9B840	5	3	3			tr|E9B840|E9B840_LEIDB 60S ribosomal protein L10, putative OS=Leishmania donovani (strain BPK282A1) GN=LDBPK_040750 PE=4 SV=1	non-human	1	5	3	3	2	4	4	1	2	3	1	2	3	22.1	15	15	24.557	213	213	0	7.716	By MS/MS	By MS/MS	By MS/MS	0.31979	0.64411	16.942	7	7	Median	0.22841	0.47343	23.9	7	7	Median	0.77994	0.76498	28.508	7	7
E9B861	E9B861	1	1	1			tr|E9B861|E9B861_LEIDB Adenylate kinase, putative OS=Leishmania donovani (strain BPK282A1) GN=LDBPK_040960 PE=3 SV=1	non-human	1	1	1	1	0	0	1	0	0	1	0	0	1	9.1	9.1	9.1	23.042	209	209	0	12.332			By MS/MS	NaN	NaN	NaN	1	0	Median	NaN	NaN	NaN	1	0	Median	NaN	NaN	NaN	1	0
E9B882	E9B882	2	2	2			tr|E9B882|E9B882_LEIDB Fructose-1,6-bisphosphatase, cytosolic, putative OS=Leishmania donovani (strain BPK282A1) GN=LDBPK_041170 PE=3 SV=1	non-human	1	2	2	2	1	0	1	1	0	1	1	0	1	8.5	8.5	8.5	38.856	351	351	0	4.9795	By MS/MS		By MS/MS	NaN	NaN	NaN	0	0	Median	NaN	NaN	NaN	0	0	Median	NaN	NaN	NaN	0	0
E9B884	E9B884	2	2	2			tr|E9B884|E9B884_LEIDB RNA-binding protein, putative OS=Leishmania donovani (strain BPK282A1) GN=LDBPK_041190 PE=4 SV=1	non-human	1	2	2	2	0	0	2	0	0	2	0	0	2	11.6	11.6	11.6	34.533	311	311	0.0023064	2.4868			By MS/MS	0.54335	0.96668	34.548	2	2	Median	0.46811	0.74448	2.5253	2	2	Median	0.86154	0.75787	38.583	2	2
E9B890	E9B890	14	12	12			tr|E9B890|E9B890_LEIDB Actin OS=Leishmania donovani (strain BPK282A1) GN=LDBPK_041250 PE=3 SV=1	non-human	1	14	12	12	10	12	13	8	10	11	8	10	11	49.2	42	42	42.049	376	376	0	127.5	By MS/MS	By MS/MS	By MS/MS	0.27667	0.47324	32.389	31	19	Leave out requantified	0.24717	0.35004	93.276	29	17	Leave out requantified	1.0939	1.0343	41.282	29	17
E9B893	E9B893	1	1	1			tr|E9B893|E9B893_LEIDB Ras-like small GTPases, putative OS=Leishmania donovani (strain BPK282A1) GN=LDBPK_050030 PE=3 SV=1	non-human	1	1	1	1	0	0	1	0	0	1	0	0	1	5.6	5.6	5.6	21.67	195	195	0.0035541	2.2706			By MS/MS	NaN	NaN	NaN	1	0	Median	NaN	NaN	NaN	1	0	Median	NaN	NaN	NaN	1	0
E9B8B2	E9B8B2	2	2	2			tr|E9B8B2|E9B8B2_LEIDB Dual specificity phosphatase-like protein OS=Leishmania donovani (strain BPK282A1) GN=LDBPK_050220 PE=4 SV=1	non-human	1	2	2	2	1	2	0	1	2	0	1	2	0	5.5	5.5	5.5	69.774	668	668	0.0099578	1.7216	By MS/MS	By MS/MS		0.5878	0.97231	17.538	3	0	Plateau	0.59144	0.89393	21.633	3	0	Plateau	1.0124	0.92398	4.2977	3	0
E9B8B8	E9B8B8	1	1	1			tr|E9B8B8|E9B8B8_LEIDB Protein tyrosine phosphatase, putative OS=Leishmania donovani (strain BPK282A1) GN=LDBPK_050280 PE=4 SV=1	non-human	1	1	1	1	0	0	1	0	0	1	0	0	1	5.8	5.8	5.8	25.054	224	224	0.0032584	2.3846			By MS/MS	NaN	NaN	NaN	0	0	Median	NaN	NaN	NaN	0	0	Median	NaN	NaN	NaN	0	0
E9B8C5	E9B8C5	4	4	4			tr|E9B8C5|E9B8C5_LEIDB Trypanothione reductase OS=Leishmania donovani (strain BPK282A1) GN=LDBPK_050350 PE=3 SV=1	non-human	1	4	4	4	1	2	4	1	2	4	1	2	4	9.4	9.4	9.4	52.993	491	491	0	21.455	By MS/MS	By MS/MS	By MS/MS	0.20631	0.43797	63.791	8	7	Median	0.26234	0.50152	59.549	7	6	Median	0.97449	0.93349	44.427	7	6
E9B8E1	E9B8E1	14	13	13			tr|E9B8E1|E9B8E1_LEIDB ATP synthase subunit alpha OS=Leishmania donovani (strain BPK282A1) GN=LDBPK_050510 PE=3 SV=1	non-human	1	14	13	13	9	10	11	8	9	10	8	9	10	29.6	27.4	27.4	62.548	574	574	0	72.188	By MS/MS	By MS/MS	By MS/MS	0.094686	0.14874	29.744	24	18	Leave out requantified	0.10928	0.15064	37.638	24	18	Leave out requantified	1.1305	1.0749	18.769	24	18
E9B8I6	E9B8I6	10	10	10			tr|E9B8I6|E9B8I6_LEIDB Dipeptidyl-peptidase III, putative OS=Leishmania donovani (strain BPK282A1) GN=LDBPK_050960 PE=4 SV=1	non-human	1	10	10	10	2	3	10	2	3	10	2	3	10	20.2	20.2	20.2	75.974	679	679	0	42.526	By MS/MS	By MS/MS	By MS/MS	0.36469	0.56718	115.57	9	8	Median	0.28021	0.39259	73.268	8	7	Median	0.87857	0.79947	125.41	8	7
E9B8J8	E9B8J8	1	1	1			tr|E9B8J8|E9B8J8_LEIDB Uncharacterized protein OS=Leishmania donovani (strain BPK282A1) GN=LDBPK_051080 PE=4 SV=1	non-human	1	1	1	1	0	0	1	0	0	1	0	0	1	3.4	3.4	3.4	80.274	726	726	0	5.9908			By MS/MS	NaN	NaN	NaN	0	0	Median	NaN	NaN	NaN	0	0	Median	NaN	NaN	NaN	0	0
E9B8K4	E9B8K4	2	2	2			tr|E9B8K4|E9B8K4_LEIDB Vacuolar ATPase subunit-like protein OS=Leishmania donovani (strain BPK282A1) GN=LDBPK_051140 PE=4 SV=1	non-human	1	2	2	2	0	1	1	0	1	1	0	1	1	7	7	7	41.554	357	357	0.0010285	2.8829		By MS/MS	By MS/MS	NaN	NaN	NaN	0	0	Median	NaN	NaN	NaN	0	0	Median	NaN	NaN	NaN	0	0
E9B8L2	E9B8L2	6	3	2			tr|E9B8L2|E9B8L2_LEIDB Histone H4 OS=Leishmania donovani (strain BPK282A1) GN=LDBPK_060010 PE=3 SV=1	non-human	1	6	3	2	3	5	5	2	3	3	1	2	2	50	27	19	11.424	100	100	0	5.6364	By MS/MS	By MS/MS	By MS/MS	0.17926	0.37918	38.326	3	1	Median	0.11379	0.22672	36.738	3	1	Plateau	0.97839	0.92927	35.194	3	1
E9B8L4	E9B8L4	8	8	8			tr|E9B8L4|E9B8L4_LEIDB Uncharacterized protein OS=Leishmania donovani (strain BPK282A1) GN=LDBPK_060030 PE=4 SV=1	non-human	1	8	8	8	3	3	8	3	3	8	3	3	8	14.2	14.2	14.2	75.447	675	675	0	54.795	By MS/MS	By MS/MS	By MS/MS	0.31842	0.53171	28.475	12	3	Leave out requantified	0.34691	0.45346	40.945	12	3	Leave out requantified	1.1594	1.0066	20.502	12	3
E9B8M3	E9B8M3	3	3	3			tr|E9B8M3|E9B8M3_LEIDB Peptidyl-prolyl cis-trans isomerase OS=Leishmania donovani (strain BPK282A1) GN=LDBPK_060120 PE=1 SV=1	non-human	1	3	3	3	1	0	3	1	0	3	1	0	3	15	15	15	20.412	187	187	0.00070522	3.1998	By MS/MS		By MS/MS	0.27187	0.48343	38.438	2	2	Median	0.30531	0.48703	76.084	2	2	Median	1.123	0.9797	38.142	2	2
E9B8M5	E9B8M5	1	1	1			tr|E9B8M5|E9B8M5_LEIDB Proteasome subunit beta type OS=Leishmania donovani (strain BPK282A1) GN=LDBPK_060140 PE=3 SV=1	non-human	1	1	1	1	0	0	1	0	0	1	0	0	1	5.3	5.3	5.3	28.002	247	247	0.0041231	2.1021			By MS/MS	NaN	NaN	NaN	1	1	Median	NaN	NaN	NaN	1	1	Median	NaN	NaN	NaN	1	1
E9B8P8	E9B8P8	1	1	1			tr|E9B8P8|E9B8P8_LEIDB Glutamine synthetase, putative OS=Leishmania donovani (strain BPK282A1) GN=LDBPK_060370 PE=3 SV=1	non-human	1	1	1	1	0	0	1	0	0	1	0	0	1	2.3	2.3	2.3	54.68	484	484	0.0073755	1.8428			By MS/MS	NaN	NaN	NaN	1	1	Median	NaN	NaN	NaN	1	1	Median	NaN	NaN	NaN	1	1
E9B8Q2	E9B8Q2	3	3	3			tr|E9B8Q2|E9B8Q2_LEIDB 60S ribosomal protein L19, putative OS=Leishmania donovani (strain BPK282A1) GN=LDBPK_060410 PE=3 SV=1	non-human	1	3	3	3	1	2	3	1	2	3	1	2	3	13.9	13.9	13.9	28.062	245	245	0	19.715	By MS/MS	By MS/MS	By MS/MS	0.18906	0.29498	28.5	4	4	Median	0.16654	0.24464	45.269	4	4	Median	0.91756	0.81459	19.399	4	4
E9B8R9	E9B8R9	1	1	1			tr|E9B8R9|E9B8R9_LEIDB 60S ribosomal protein L23a, putative OS=Leishmania donovani (strain BPK282A1) GN=LDBPK_060590 PE=3 SV=1	non-human	1	1	1	1	1	1	1	1	1	1	1	1	1	9	9	9	16.352	145	145	0	50.416	By MS/MS	By MS/MS	By MS/MS	0.30632	0.43325	71.923	3	2	Median	0.15397	0.196	40.027	3	2	Median	0.50264	0.47513	97.621	3	2
E9B8W9	E9B8W9	3	3	3			tr|E9B8W9|E9B8W9_LEIDB Protein disulfide isomerase OS=Leishmania donovani (strain BPK282A1) GN=LDBPK_061090 PE=4 SV=1	non-human	1	3	3	3	1	0	3	1	0	3	1	0	3	21.8	21.8	21.8	14.895	133	133	0	6.5768	By MS/MS		By MS/MS	0.30658	0.45627	1.4434	2	2	Median	0.31623	0.4077	48.722	2	2	Median	1.0315	0.90135	49.257	2	2
E9B8X1	E9B8X1	2	2	2			tr|E9B8X1|E9B8X1_LEIDB Deoxyribose-phosphate aldolase, putative OS=Leishmania donovani (strain BPK282A1) GN=LDBPK_061110 PE=3 SV=1	non-human	1	2	2	2	1	0	2	1	0	2	1	0	2	12.5	12.5	12.5	29.666	281	281	0	6.3545	By MS/MS		By MS/MS	0.22716	0.30133	24.4	2	2	Median	0.18864	0.22742	26.931	2	2	Median	0.83044	0.75822	5.7774	2	2
E9B8Z2	E9B8Z2	1	1	1			tr|E9B8Z2|E9B8Z2_LEIDB Coproporphyrinogen III oxidase OS=Leishmania donovani (strain BPK282A1) GN=LDBPK_061330 PE=3 SV=1	non-human	1	1	1	1	1	1	1	1	1	1	1	1	1	4.3	4.3	4.3	34.476	301	301	0	9.1942	By MS/MS	By MS/MS	By MS/MS	NaN	NaN	NaN	0	0	Median	NaN	NaN	NaN	0	0	Median	NaN	NaN	NaN	0	0
E9B909	E9B909	3	3	3			tr|E9B909|E9B909_LEIDB ATP-dependent DEAD/H RNA helicase, putative OS=Leishmania donovani (strain BPK282A1) GN=LDBPK_070130 PE=4 SV=1	non-human	1	3	3	3	1	2	3	1	2	3	1	2	3	5.5	5.5	5.5	59.625	544	544	0	5.6169	By MS/MS	By MS/MS	By MS/MS	0.21416	0.43565	25.99	4	4	Median	NaN	NaN	NaN	1	1	Median	NaN	NaN	NaN	1	1
E9B917	E9B917	3	3	3			tr|E9B917|E9B917_LEIDB Cytochrome c1, heme protein, mitochondrial, putative OS=Leishmania donovani (strain BPK282A1) GN=LDBPK_070210 PE=4 SV=1	non-human	1	3	3	3	3	2	1	3	2	1	3	2	1	14	14	14	29.891	258	258	0	4.0165	By MS/MS	By MS/MS	By MS/MS	0.14891	0.31555	17.7	3	3	Plateau	0.16168	0.3027	8.8018	3	3	Plateau	1.0091	0.92433	7.747	3	3
E9B949	E9B949	3	3	3			tr|E9B949|E9B949_LEIDB 60S ribosomal protein L7a, putative OS=Leishmania donovani (strain BPK282A1) GN=LDBPK_070550 PE=4 SV=1	non-human	1	3	3	3	2	1	2	2	1	2	2	1	2	12.9	12.9	12.9	39.102	348	348	0	24.667	By MS/MS	By MS/MS	By MS/MS	0.15254	0.3029	60.16	5	2	Median	0.13993	0.27475	42.515	5	2	Median	0.88155	0.8712	28.899	5	2
E9B964	E9B964	3	3	3			tr|E9B964|E9B964_LEIDB Uncharacterized protein OS=Leishmania donovani (strain BPK282A1) GN=LDBPK_070710 PE=4 SV=1	non-human	1	3	3	3	1	2	3	1	2	3	1	2	3	9	9	9	37.952	335	335	0	4.1131	By MS/MS	By MS/MS	By MS/MS	0.26618	0.51934	85.749	4	4	Median	0.43893	0.81832	68.594	4	4	Median	2.0136	2.0201	137.37	4	4
E9B993	E9B993	5	5	5			tr|E9B993|E9B993_LEIDB Splicing factor ptsr1-like protein OS=Leishmania donovani (strain BPK282A1) GN=LDBPK_071020 PE=4 SV=1	non-human	1	5	5	5	1	3	4	1	3	4	1	3	4	17.9	17.9	17.9	42.207	375	375	0	17.831	By MS/MS	By MS/MS	By MS/MS	0.2079	0.38568	73.053	4	4	Median	0.091433	0.14616	36.832	2	2	Median	0.76113	0.67964	45.386	2	2
E9B9D5	E9B9D5	3	3	3			tr|E9B9D5|E9B9D5_LEIDB Superoxide dismutase OS=Leishmania donovani (strain BPK282A1) GN=LDBPK_080300 PE=3 SV=1	non-human	1	3	3	3	1	1	3	1	1	3	1	1	3	17	17	17	26.211	230	230	0	12.483	By MS/MS	By MS/MS	By MS/MS	0.39156	0.60905	73.002	3	3	Median	0.28486	0.37178	67.441	3	3	Plateau	0.67749	0.57285	138.92	3	3
E9B9G2	E9B9G2	1	1	1			tr|E9B9G2|E9B9G2_LEIDB Translation initiation factor-like protein OS=Leishmania donovani (strain BPK282A1) GN=LDBPK_080570 PE=4 SV=1	non-human	1	1	1	1	0	0	1	0	0	1	0	0	1	3.5	3.5	3.5	37.925	345	345	0.0073801	1.8465			By MS/MS	NaN	NaN	NaN	1	1	Median	NaN	NaN	NaN	1	1	Median	NaN	NaN	NaN	1	1
E9B9K1	E9B9K1	5	5	5			tr|E9B9K1|E9B9K1_LEIDB Uncharacterized protein OS=Leishmania donovani (strain BPK282A1) GN=LDBPK_081010 PE=4 SV=1	non-human	1	5	5	5	1	0	4	1	0	4	1	0	4	16.4	16.4	16.4	42.06	365	365	0	7.0482	By MS/MS		By MS/MS	0.11698	0.23921	37.615	2	2	Median	0.30532	0.59527	55.679	2	2	Median	2.6101	2.4479	18.219	2	2
E9B9K2	E9B9K2	5	5	5			tr|E9B9K2|E9B9K2_LEIDB Stress-induced protein sti1 OS=Leishmania donovani (strain BPK282A1) GN=LDBPK_081020 PE=4 SV=1	non-human	1	5	5	5	1	1	5	1	1	5	1	1	5	10.6	10.6	10.6	62.239	546	546	0	13.232	By MS/MS	By MS/MS	By MS/MS	0.39936	0.62183	79.053	7	5	Median	0.51269	0.66523	87.703	7	5	Median	0.54891	0.51967	121.19	7	5
E9B9L9;E9BFK9	E9B9L9;E9BFK9	7;5	7;5	7;5			tr|E9B9L9|E9B9L9_LEIDB Beta tubulin (Fragment) OS=Leishmania donovani (strain BPK282A1) GN=LDBPK_081290 PE=3 SV=1;tr|E9BFK9|E9BFK9_LEIDB Beta tubulin (Fragment) OS=Leishmania donovani (strain BPK282A1) GN=LDBPK_212240 PE=4 SV=1	non-human	2	7	7	7	5	7	5	5	7	5	5	7	5	80.3	80.3	80.3	15.892	147	147;79	0	185.14	By MS/MS	By MS/MS	By MS/MS	0.16306	0.31352	36.54	27	14	Leave out requantified	0.12398	0.22979	46.653	24	11	Leave out requantified	0.8858	0.86432	25.487	24	11
E9B9M3	E9B9M3	1	1	1			tr|E9B9M3|E9B9M3_LEIDB Vesicle-associated membrane protein, putative OS=Leishmania donovani (strain BPK282A1) GN=LDBPK_080030 PE=4 SV=1	non-human	1	1	1	1	0	1	1	0	1	1	0	1	1	6.5	6.5	6.5	24.172	215	215	0	9.1054		By MS/MS	By MS/MS	0.37999	0.67965	18.539	2	0	Median	0.38891	0.67781	5.0486	2	0	Median	0.9942	0.99806	12.754	2	0
E9B9P8	E9B9P8	5	5	5			tr|E9B9P8|E9B9P8_LEIDB Uncharacterized protein OS=Leishmania donovani (strain BPK282A1) GN=LDBPK_090120 PE=4 SV=1	non-human	1	5	5	5	0	0	5	0	0	5	0	0	5	12.2	12.2	12.2	65.683	582	582	0	34.859			By MS/MS	0.29015	0.55404	14.664	4	4	Median	0.28982	0.56819	53.383	3	3	Median	1.0099	0.9086	54.946	3	3
E9B9W9	E9B9W9	7	7	7			tr|E9B9W9|E9B9W9_LEIDB Oligopeptidase b OS=Leishmania donovani (strain BPK282A1) GN=LDBPK_090820 PE=4 SV=1	non-human	1	7	7	7	1	1	7	1	1	7	1	1	7	15.6	15.6	15.6	83.102	731	731	0	16.996	By MS/MS	By MS/MS	By MS/MS	0.28695	0.44838	55.977	7	5	Median	0.39834	0.6666	32.596	5	3	Median	1.6133	1.3445	43.57	4	3
E9B9Y3	E9B9Y3	3	1	1			tr|E9B9Y3|E9B9Y3_LEIDB Calmodulin, putative OS=Leishmania donovani (strain BPK282A1) GN=LDBPK_090970 PE=4 SV=1	non-human	1	3	1	1	2	3	2	0	1	0	0	1	0	24.8	20.1	20.1	16.824	149	149	0	10.653	By matching	By MS/MS	By matching	NaN	NaN	NaN	1	1	Median	NaN	NaN	NaN	1	1	Median	NaN	NaN	NaN	1	1
E9B9Y8	E9B9Y8	8	7	7			tr|E9B9Y8|E9B9Y8_LEIDB Elongation factor-1 gamma OS=Leishmania donovani (strain BPK282A1) GN=LDBPK_091020 PE=4 SV=1	non-human	1	8	7	7	2	4	8	1	3	7	1	3	7	19.3	17.8	17.8	51.312	450	450	0	31.54	By MS/MS	By MS/MS	By MS/MS	0.18382	0.35724	52.715	13	10	Median	0.21749	0.3801	39.913	13	10	Median	1.1601	1.0315	54.913	13	10
E9B9Z3	E9B9Z3	2	2	2			tr|E9B9Z3|E9B9Z3_LEIDB Uncharacterized protein OS=Leishmania donovani (strain BPK282A1) GN=LDBPK_091070 PE=4 SV=1	non-human	1	2	2	2	1	1	2	1	1	2	1	1	2	4.9	4.9	4.9	67.251	615	615	0	5.7054	By MS/MS	By MS/MS	By MS/MS	0.30677	0.59672	9.5096	3	2	Median	0.2365	0.43536	71.27	3	2	Median	0.80041	0.7764	71.917	3	2
E9BA03	E9BA03	2	2	2			tr|E9BA03|E9BA03_LEIDB Mitochondrial RNA binding protein 2 OS=Leishmania donovani (strain BPK282A1) GN=LDBPK_091180 PE=4 SV=1	non-human	1	2	2	2	0	2	2	0	2	2	0	2	2	8.3	8.3	8.3	26.964	242	242	0.00070796	3.2727		By MS/MS	By MS/MS	0.18069	0.28689	41.35	2	2	Median	0.21123	0.29618	48.31	2	2	Median	1.169	1.0066	4.2407	2	2
E9BA15	E9BA15	2	2	2			tr|E9BA15|E9BA15_LEIDB Uncharacterized protein (Fragment) OS=Leishmania donovani (strain BPK282A1) GN=LDBPK_091300 PE=4 SV=1	non-human	1	2	2	2	2	2	1	2	2	1	2	2	1	0.5	0.5	0.5	218.14	2047	2047	0	3.9207	By MS/MS	By MS/MS	By MS/MS	0.26626	0.45056	13.476	5	5	Median	0.16695	0.35968	20.694	3	3	Median	0.8275	0.82388	19.057	3	3
E9BA68	E9BA68	1	1	1			tr|E9BA68|E9BA68_LEIDB Mitogen-activated protein kinase, putative OS=Leishmania donovani (strain BPK282A1) GN=LDBPK_100200 PE=4 SV=1	non-human	1	1	1	1	1	0	1	1	0	1	1	0	1	4.7	4.7	4.7	46.45	407	407	0.0041375	2.1402	By MS/MS		By MS/MS	NaN	NaN	NaN	0	0	Median	NaN	NaN	NaN	0	0	Median	NaN	NaN	NaN	0	0
E9BA69	E9BA69	3	3	3			tr|E9BA69|E9BA69_LEIDB Nucleolar protein, putative OS=Leishmania donovani (strain BPK282A1) GN=LDBPK_100210 PE=4 SV=1	non-human	1	3	3	3	1	0	3	1	0	3	1	0	3	7.4	7.4	7.4	52.612	473	473	0	10.547	By MS/MS		By MS/MS	0.11458	0.20609	27.55	2	2	Median	0.23309	0.3711	102.86	2	2	Median	2.0344	1.7726	127.34	2	2
E9BA79	E9BA79	19	17	17			tr|E9BA79|E9BA79_LEIDB Isocitrate dehydrogenase [NADP] OS=Leishmania donovani (strain BPK282A1) GN=LDBPK_100310 PE=3 SV=1	non-human	1	19	17	17	10	14	14	8	12	12	8	12	12	46.7	43.7	43.7	48.493	435	435	0	54.46	By MS/MS	By MS/MS	By MS/MS	0.17054	0.2791	35.877	23	19	Leave out requantified	0.15926	0.24339	32.002	19	15	Leave out requantified	1.2619	1.2086	17.084	19	15
E9BA87;E9BA89;E9BA88	E9BA87;E9BA89;E9BA88	1;1;1	1;1;1	1;1;1			tr|E9BA87|E9BA87_LEIDB Folate/biopterin transporter, putative (Fragment) OS=Leishmania donovani (strain BPK282A1) GN=LDBPK_100390 PE=4 SV=1;tr|E9BA89|E9BA89_LEIDB Folate/biopterin transporter, putative (Fragment) OS=Leishmania donovani (strain BPK282A1) GN	non-human	3	1	1	1	0	1	1	0	1	1	0	1	1	6.2	6.2	6.2	33.35	305	305;354;397	0	12.743		By MS/MS	By MS/MS	0.47907	0.75422	11.756	2	1	Median	0.32326	0.45208	23.53	2	1	Median	0.66061	0.56878	13.059	2	1
E9BAA0	E9BAA0	2	2	2			tr|E9BAA0|E9BAA0_LEIDB Uncharacterized protein OS=Leishmania donovani (strain BPK282A1) GN=LDBPK_100550 PE=4 SV=1	non-human	1	2	2	2	2	1	0	2	1	0	2	1	0	0.4	0.4	0.4	713.26	6798	6798	0.0010471	3.0779	By MS/MS	By MS/MS		NaN	NaN	NaN	1	1	Median	NaN	NaN	NaN	1	1	Median	NaN	NaN	NaN	1	1
E9BAC8	E9BAC8	1	1	1			tr|E9BAC8|E9BAC8_LEIDB Uncharacterized protein OS=Leishmania donovani (strain BPK282A1) GN=LDBPK_100830 PE=4 SV=1	non-human	1	1	1	1	0	0	1	0	0	1	0	0	1	4.5	4.5	4.5	46.194	419	419	0.0071229	1.8948			By MS/MS	NaN	NaN	NaN	1	1	Median	NaN	NaN	NaN	1	1	Median	NaN	NaN	NaN	1	1
E9BAD5	E9BAD5	1	1	1			tr|E9BAD5|E9BAD5_LEIDB Nuclear transport factor 2, putative OS=Leishmania donovani (strain BPK282A1) GN=LDBPK_100900 PE=4 SV=1	non-human	1	1	1	1	1	1	1	1	1	1	1	1	1	9.7	9.7	9.7	13.886	124	124	0.0016578	2.5539	By MS/MS	By MS/MS	By MS/MS	NaN	NaN	NaN	0	0	Median	NaN	NaN	NaN	0	0	Median	NaN	NaN	NaN	0	0
E9BCR4;E9BAD7	E9BCR4;E9BAD7	1;1	1;1	1;1			tr|E9BCR4|E9BCR4_LEIDB Histone H3, putative (Fragment) OS=Leishmania donovani (strain BPK282A1) GN=LDBPK_160610 PE=4 SV=1;tr|E9BAD7|E9BAD7_LEIDB Histone H3 OS=Leishmania donovani (strain BPK282A1) GN=LDBPK_100920 PE=4 SV=1	non-human	2	1	1	1	0	0	1	0	0	1	0	0	1	12	12	12	12.042	108	108;130	0.0044248	2.0654			By MS/MS	NaN	NaN	NaN	1	1	Median	NaN	NaN	NaN	1	1	Median	NaN	NaN	NaN	1	1
E9BAE1	E9BAE1	4	4	4			tr|E9BAE1|E9BAE1_LEIDB Small GTP-binding protein Rab11, putative OS=Leishmania donovani (strain BPK282A1) GN=LDBPK_100960 PE=3 SV=1	non-human	1	4	4	4	0	0	4	0	0	4	0	0	4	22.1	22.1	22.1	23.402	208	208	0	4.9478			By MS/MS	0.20521	0.32403	41.097	3	3	Median	0.43799	0.71564	76.068	2	2	Median	1.7464	1.5501	26.078	2	2
E9BAJ8	E9BAJ8	5	5	5			tr|E9BAJ8|E9BAJ8_LEIDB Seryl-tRNA synthetase, putative OS=Leishmania donovani (strain BPK282A1) GN=LDBPK_110100 PE=3 SV=1	non-human	1	5	5	5	1	0	5	1	0	5	1	0	5	15	15	15	53.041	474	474	0	10.031	By MS/MS		By MS/MS	0.56155	0.85738	59.627	6	6	Median	0.21289	0.32879	94.148	4	4	Median	0.70944	0.62487	128.15	4	4
E9BAM3	E9BAM3	2	2	2			tr|E9BAM3|E9BAM3_LEIDB 14-3-3 protein, putative OS=Leishmania donovani (strain BPK282A1) GN=LDBPK_110350 PE=4 SV=1	non-human	1	2	2	2	1	1	2	1	1	2	1	1	2	11.1	11.1	11.1	29.233	253	253	0	12.965	By MS/MS	By MS/MS	By MS/MS	0.26543	0.38782	140.31	4	2	Median	0.22458	0.32227	28.69	4	2	Median	0.84047	0.73846	153.12	4	2
E9BAQ1	E9BAQ1	5	5	4			tr|E9BAQ1|E9BAQ1_LEIDB Aminopeptidase, putative (Fragment) OS=Leishmania donovani (strain BPK282A1) GN=LDBPK_110630 PE=4 SV=1	non-human	1	5	5	4	2	2	5	2	2	5	2	2	4	26.7	26.7	23.2	30.29	285	285	0	47.342	By MS/MS	By MS/MS	By MS/MS	0.23186	0.44603	21.012	9	7	Median	0.22968	0.45579	27.48	9	7	Median	1.0417	0.98217	21.85	9	7
E9BAQ2	E9BAQ2	3	2	2			tr|E9BAQ2|E9BAQ2_LEIDB Aminopeptidase, putative (Fragment) OS=Leishmania donovani (strain BPK282A1) GN=LDBPK_110640 PE=4 SV=1	non-human	1	3	2	2	1	1	3	1	1	2	1	1	2	10.4	7.4	7.4	35.816	338	338	0	74.648	By MS/MS	By MS/MS	By MS/MS	0.25674	0.74984	33.329	4	1	Linear	0.25415	0.53089	87.714	4	1	Median	0.85953	0.81615	126.83	3	1
E9BAQ9	E9BAQ9	1	1	1			tr|E9BAQ9|E9BAQ9_LEIDB ATPase ASNA1 homolog OS=Leishmania donovani (strain BPK282A1) GN=LDBPK_110710 PE=3 SV=1	non-human	1	1	1	1	0	0	1	0	0	1	0	0	1	3.4	3.4	3.4	44.009	409	409	0.0010345	2.9286			By MS/MS	NaN	NaN	NaN	0	0	Median	NaN	NaN	NaN	0	0	Median	NaN	NaN	NaN	0	0
E9BAR6	E9BAR6	1	1	1			tr|E9BAR6|E9BAR6_LEIDB 40S ribosomal protein S21, putative (Fragment) OS=Leishmania donovani (strain BPK282A1) GN=LDBPK_110780 PE=4 SV=1	non-human	1	1	1	1	1	1	0	1	1	0	1	1	0	7.9	7.9	7.9	22.404	202	202	0	3.8212	By MS/MS	By MS/MS		0.19278	0.40065	10.532	3	2	Median	0.14083	0.26751	42.904	3	2	Plateau	0.72378	0.71764	35.645	3	2
E9BAS0	E9BAS0	3	3	3			tr|E9BAS0|E9BAS0_LEIDB Uncharacterized protein OS=Leishmania donovani (strain BPK282A1) GN=LDBPK_110820 PE=4 SV=1	non-human	1	3	3	3	0	0	3	0	0	3	0	0	3	12.8	12.8	12.8	37.409	337	337	0	8.8553			By MS/MS	NaN	NaN	NaN	1	0	Median	NaN	NaN	NaN	1	0	Median	NaN	NaN	NaN	1	0
E9BAT4;E9BAT5	E9BAT4;E9BAT5	2;1	2;1	2;1			tr|E9BAT4|E9BAT4_LEIDB 40S ribosomal protein S5 (Fragment) OS=Leishmania donovani (strain BPK282A1) GN=LDBPK_110960 PE=4 SV=1;tr|E9BAT5|E9BAT5_LEIDB 40S ribosomal protein S5 (Fragment) OS=Leishmania donovani (strain BPK282A1) GN=LDBPK_110970 PE=4 SV=1	non-human	2	2	2	2	2	1	2	2	1	2	2	1	2	26.7	26.7	26.7	10.408	90	90;47	0	4.3432	By MS/MS	By MS/MS	By MS/MS	0.1082	0.16687	78.94	3	3	Plateau	0.15919	0.21036	89.92	3	3	Median	0.81746	0.79012	57.235	3	3
E9BAT8	E9BAT8	20	20	20			tr|E9BAT8|E9BAT8_LEIDB Pyruvate phosphate dikinase, putative OS=Leishmania donovani (strain BPK282A1) GN=LDBPK_111000 PE=4 SV=1	non-human	1	20	20	20	9	11	16	9	11	16	9	11	16	30.9	30.9	30.9	100.95	914	914	0	80.973	By MS/MS	By MS/MS	By MS/MS	0.29771	0.59433	20.659	30	23	Leave out requantified	0.31587	0.56827	15.367	30	23	Leave out requantified	0.87415	0.81269	32.843	30	23
E9BAU1	E9BAU1	1	1	1			tr|E9BAU1|E9BAU1_LEIDB Uncharacterized protein OS=Leishmania donovani (strain BPK282A1) GN=LDBPK_111030 PE=4 SV=1	non-human	1	1	1	1	1	1	1	1	1	1	1	1	1	8.6	8.6	8.6	27.649	268	268	0	15.642	By MS/MS	By MS/MS	By MS/MS	0.1638	0.2233	6.8821	3	3	Plateau	0.13866	0.20317	39.723	3	3	Plateau	0.94894	0.92152	46.987	3	3
E9BAU3	E9BAU3	1	1	1			tr|E9BAU3|E9BAU3_LEIDB Pretranslocation protein, alpha subunit, putative OS=Leishmania donovani (strain BPK282A1) GN=LDBPK_111050 PE=3 SV=1	non-human	1	1	1	1	1	0	1	1	0	1	1	0	1	1.9	1.9	1.9	53.967	486	486	0.0053375	2.0164	By MS/MS		By MS/MS	0.40575	0.76415	47.119	2	2	Median	NaN	NaN	NaN	1	1	Median	NaN	NaN	NaN	1	1
E9BAU9;E9BAV1	E9BAU9	3;1	3;1	3;1			tr|E9BAU9|E9BAU9_LEIDB 60S ribosomal protein L28, putative OS=Leishmania donovani (strain BPK282A1) GN=LDBPK_111110 PE=4 SV=1	non-human	2	3	3	3	3	3	2	3	3	2	3	3	2	19	19	19	16.371	147	147;44	0	31.705	By MS/MS	By MS/MS	By MS/MS	0.28432	0.44082	77.159	5	5	Median	0.12805	0.19713	26.275	2	2	Median	0.67789	0.70675	80.56	2	2
E9BAV6	E9BAV6	4	2	2			tr|E9BAV6|E9BAV6_LEIDB 40S ribosomal protein S15A, putative OS=Leishmania donovani (strain BPK282A1) GN=LDBPK_111180 PE=3 SV=1	non-human	1	4	2	2	2	3	4	1	1	2	1	1	2	29.2	16.2	16.2	14.696	130	130	0	6.9304	By MS/MS	By MS/MS	By MS/MS	0.17705	0.36322	14.034	3	1	Plateau	0.10986	0.2419	26.4	3	1	Median	0.79907	0.75699	33.148	3	1
E9BAX6	E9BAX6	2	2	2			tr|E9BAX6|E9BAX6_LEIDB Proteasome subunit beta type OS=Leishmania donovani (strain BPK282A1) GN=LDBPK_120030 PE=3 SV=1	non-human	1	2	2	2	1	1	2	1	1	2	1	1	2	9.2	9.2	9.2	30.332	283	283	0	5.7244	By MS/MS	By MS/MS	By MS/MS	0.19758	0.17548	44.601	3	3	Median	0.1503	0.20647	20.265	3	3	Plateau	1.7027	1.7095	41.019	3	3
E9BAZ6;E9BS03;Q8NB90	E9BAZ6	5;1;1	1;0;0	1;0;0			tr|E9BAZ6|E9BAZ6_LEIDB Proteasome regulatory ATPase subunittcc1l8.3, putative OS=Leishmania donovani (strain BPK282A1) GN=LDBPK_120190 PE=3 SV=1	non-human	3	5	1	1	3	4	5	0	0	1	0	0	1	13.4	4.9	4.9	45.862	411	411;361;893	0	4.0943	By matching	By matching	By MS/MS	NaN	NaN	NaN	1	1	Median	NaN	NaN	NaN	0	0	Median	NaN	NaN	NaN	0	0
E9BB00	E9BB00	1	1	1			tr|E9BB00|E9BB00_LEIDB Uncharacterized protein OS=Leishmania donovani (strain BPK282A1) GN=LDBPK_120255 PE=3 SV=1	non-human	1	1	1	1	0	0	1	0	0	1	0	0	1	1.3	1.3	1.3	88.412	784	784	0.0074074	1.8657			By MS/MS	NaN	NaN	NaN	1	1	Median	NaN	NaN	NaN	1	1	Median	NaN	NaN	NaN	1	1
E9BB42	E9BB42	6	6	6			tr|E9BB42|E9BB42_LEIDB Cytochrome c oxidase subunit IV OS=Leishmania donovani (strain BPK282A1) GN=LDBPK_120620 PE=4 SV=1	non-human	1	6	6	6	2	4	5	2	4	5	2	4	5	25.7	25.7	25.7	39.596	343	343	0	17.167	By MS/MS	By MS/MS	By MS/MS	0.23758	0.42969	129.67	7	6	Median	0.25027	0.32928	79.598	7	6	Median	0.47543	0.42167	129.39	6	6
E9BB45	E9BB45	1	1	1			tr|E9BB45|E9BB45_LEIDB Uncharacterized protein OS=Leishmania donovani (strain BPK282A1) GN=LDBPK_120650 PE=4 SV=1	non-human	1	1	1	1	1	0	1	1	0	1	1	0	1	1.4	1.4	1.4	90.96	850	850	0.0073665	1.8357	By MS/MS		By MS/MS	0.4754	0.94784	0.4923	2	0	Median	0.54548	1.0571	19.571	2	0	Median	1.2063	1.138	15.802	2	0
E9BB84	E9BB84	7	7	7			tr|E9BB84|E9BB84_LEIDB Carboxypeptidase, putative OS=Leishmania donovani (strain BPK282A1) GN=LDBPK_130090 PE=4 SV=1	non-human	1	7	7	7	1	0	6	1	0	6	1	0	6	17.1	17.1	17.1	57.195	503	503	0	15.372	By MS/MS		By MS/MS	0.33905	0.52769	56.382	4	4	Median	0.29301	0.43862	40.952	4	4	Median	0.7497	0.6287	42.787	4	4
E9BB89	E9BB89	1	1	1			tr|E9BB89|E9BB89_LEIDB Uncharacterized protein OS=Leishmania donovani (strain BPK282A1) GN=LDBPK_130140 PE=4 SV=1	non-human	1	1	1	1	1	0	0	1	0	0	1	0	0	4.8	4.8	4.8	21.318	186	186	1	-2	By MS/MS			NaN	NaN	NaN	0	0	Median	NaN	NaN	NaN	0	0	Median	NaN	NaN	NaN	0	0
E9BBA2	E9BBA2	6	6	6			tr|E9BBA2|E9BBA2_LEIDB Uncharacterized protein OS=Leishmania donovani (strain BPK282A1) GN=LDBPK_130270 PE=4 SV=1	non-human	1	6	6	6	4	3	5	4	3	5	4	3	5	43	43	43	13.36	121	121	0	19.197	By MS/MS	By MS/MS	By MS/MS	0.62281	0.93738	63.065	12	10	Median	0.35044	0.50634	41.212	11	9	Median	0.52864	0.4986	50.604	11	9
E9BBA4	E9BBA4	1	1	1			tr|E9BBA4|E9BBA4_LEIDB Flagellar radial spoke protein, putative OS=Leishmania donovani (strain BPK282A1) GN=LDBPK_130290 PE=4 SV=1	non-human	1	1	1	1	1	0	1	1	0	1	1	0	1	3	3	3	66.88	600	600	0	16.929	By MS/MS		By MS/MS	NaN	NaN	NaN	0	0	Median	NaN	NaN	NaN	0	0	Median	NaN	NaN	NaN	0	0
E9BBA8	E9BBA8	33	21	19			tr|E9BBA8|E9BBA8_LEIDB Alpha tubulin OS=Leishmania donovani (strain BPK282A1) GN=LDBPK_130330 PE=3 SV=1	non-human	1	33	21	19	28	29	31	19	18	20	18	16	19	71	57.2	51	49.759	451	451	0	323.31	By MS/MS	By MS/MS	By MS/MS	0.12574	0.18367	39.325	72	41	Leave out requantified	0.08932	0.11915	43.187	72	41	Leave out requantified	0.82152	0.7845	41.508	71	41
E9BBB6	E9BBB6	1	1	1			tr|E9BBB6|E9BBB6_LEIDB Uncharacterized protein OS=Leishmania donovani (strain BPK282A1) GN=LDBPK_130410 PE=4 SV=1	non-human	1	1	1	1	0	0	1	0	0	1	0	0	1	4.7	4.7	4.7	31.675	278	278	0.0091491	1.7969			By MS/MS	NaN	NaN	NaN	1	1	Median	NaN	NaN	NaN	0	0	Median	NaN	NaN	NaN	0	0
E9BBC0	E9BBC0	4	4	4			tr|E9BBC0|E9BBC0_LEIDB 40S ribosomal protein S12 OS=Leishmania donovani (strain BPK282A1) GN=LDBPK_130460 PE=3 SV=1	non-human	1	4	4	4	2	3	4	2	3	4	2	3	4	23.4	23.4	23.4	15.592	141	141	0	9.639	By MS/MS	By MS/MS	By MS/MS	0.30965	0.57175	19.356	5	5	Median	0.20411	0.45733	229.84	5	5	Median	0.87357	0.81078	215.88	5	5
E9BBD6	E9BBD6	1	1	1			tr|E9BBD6|E9BBD6_LEIDB Ubiquitin-like protein OS=Leishmania donovani (strain BPK282A1) GN=LDBPK_130620 PE=4 SV=1	non-human	1	1	1	1	0	0	1	0	0	1	0	0	1	3.4	3.4	3.4	89.185	847	847	0	6.096			By MS/MS	NaN	NaN	NaN	1	1	Median	NaN	NaN	NaN	1	1	Median	NaN	NaN	NaN	1	1
E9BBF0	E9BBF0	8	8	8			tr|E9BBF0|E9BBF0_LEIDB Mitochondrial processing peptidase alpha subunit, putative OS=Leishmania donovani (strain BPK282A1) GN=LDBPK_130760 PE=4 SV=1	non-human	1	8	8	8	5	7	5	5	7	5	5	7	5	24.6	24.6	24.6	57.786	528	528	0	25.997	By MS/MS	By MS/MS	By MS/MS	0.32616	0.59502	110.58	8	8	Median	0.56481	0.98325	63.383	7	7	Median	0.99116	1.0617	60.513	7	7
E9BBH4	E9BBH4	3	3	3			tr|E9BBH4|E9BBH4_LEIDB Leucyl-tRNA synthetase, putative OS=Leishmania donovani (strain BPK282A1) GN=LDBPK_131000 PE=3 SV=1	non-human	1	3	3	3	2	1	2	2	1	2	2	1	2	2.9	2.9	2.9	122.15	1075	1075	0	6.0138	By MS/MS	By MS/MS	By MS/MS	0.70617	1.0477	11.688	2	0	Median	0.99373	1.2881	10.55	2	0	Median	1.4754	1.3077	22.188	2	0
E9BBI3	E9BBI3	2	2	2			tr|E9BBI3|E9BBI3_LEIDB Adenylosuccinate synthetase OS=Leishmania donovani (strain BPK282A1) GN=LDBPK_131090 PE=3 SV=1	non-human	1	2	2	2	0	0	2	0	0	2	0	0	2	3.8	3.8	3.8	78.475	710	710	0	3.7582			By MS/MS	NaN	NaN	NaN	1	1	Median	NaN	NaN	NaN	1	1	Median	NaN	NaN	NaN	1	1
E9BBI6	E9BBI6	11	10	10			tr|E9BBI6|E9BBI6_LEIDB 40S ribosomal protein S4 OS=Leishmania donovani (strain BPK282A1) GN=LDBPK_131120 PE=3 SV=1	non-human	1	11	10	10	6	8	9	5	7	8	5	7	8	44.7	41.8	41.8	30.65	273	273	0	26.847	By MS/MS	By MS/MS	By MS/MS	0.1527	0.27168	56.546	13	13	Median	0.14645	0.21635	188.24	12	12	Median	0.82031	0.77884	141.22	12	12
E9BBK0	E9BBK0	2	2	2			tr|E9BBK0|E9BBK0_LEIDB Uncharacterized protein OS=Leishmania donovani (strain BPK282A1) GN=LDBPK_131260 PE=4 SV=1	non-human	1	2	2	2	0	0	2	0	0	2	0	0	2	3.1	3.1	3.1	90.982	837	837	0.0010274	2.8738			By MS/MS	NaN	NaN	NaN	1	1	Median	NaN	NaN	NaN	1	1	Median	NaN	NaN	NaN	1	1
E9BBL4	E9BBL4	6	6	6			tr|E9BBL4|E9BBL4_LEIDB Chaperonin TCP20, putative OS=Leishmania donovani (strain BPK282A1) GN=LDBPK_131400 PE=3 SV=1	non-human	1	6	6	6	2	2	6	2	2	6	2	2	6	14.7	14.7	14.7	58.822	538	538	0	20.729	By MS/MS	By MS/MS	By MS/MS	0.22683	0.40562	78.458	8	8	Median	0.30297	0.4716	84.863	6	6	Median	0.99766	0.88697	64.821	6	6
E9BBL6	E9BBL6	1	1	1			tr|E9BBL6|E9BBL6_LEIDB Pyrroline-5-carboxylate reductase OS=Leishmania donovani (strain BPK282A1) GN=LDBPK_131420 PE=3 SV=1	non-human	1	1	1	1	1	1	1	1	1	1	1	1	1	2.9	2.9	2.9	28.653	272	272	0.0071473	1.9165	By MS/MS	By MS/MS	By MS/MS	0.24385	0.51909	27.765	2	2	Median	0.21416	0.45084	23.917	2	2	Median	0.87822	0.8684	0.29549	2	2
E9BBP8	E9BBP8	2	2	2			tr|E9BBP8|E9BBP8_LEIDB Nucleoside hydrolase-like protein OS=Leishmania donovani (strain BPK282A1) GN=LDBPK_140130 PE=4 SV=1	non-human	1	2	2	2	0	0	2	0	0	2	0	0	2	9.1	9.1	9.1	39.139	352	352	0	4.9066			By MS/MS	NaN	NaN	NaN	0	0	Median	NaN	NaN	NaN	0	0	Median	NaN	NaN	NaN	0	0
E9BBQ3;E9BV09	E9BBQ3;E9BV09	4;3	4;3	4;3			tr|E9BBQ3|E9BBQ3_LEIDB Carboxypeptidase, putative OS=Leishmania donovani (strain BPK282A1) GN=LDBPK_140180 PE=4 SV=1;tr|E9BV09|E9BV09_LEIDB Carboxypeptidase, putative OS=Leishmania donovani (strain BPK282A1) GN=LDBPK_366520 PE=4 SV=1	non-human	2	4	4	4	0	2	4	0	2	4	0	2	4	10.7	10.7	10.7	57.256	504	504;371	0	10.46		By MS/MS	By MS/MS	0.59792	1.0486	34.175	2	1	Median	0.53756	0.89287	28.102	2	1	Median	0.85349	0.78401	68.073	2	1
E9BBQ4	E9BBQ4	3	3	3			tr|E9BBQ4|E9BBQ4_LEIDB Uncharacterized protein OS=Leishmania donovani (strain BPK282A1) GN=LDBPK_140190 PE=4 SV=1	non-human	1	3	3	3	2	2	3	2	2	3	2	2	3	21.1	21.1	21.1	22.406	199	199	0	26.026	By MS/MS	By MS/MS	By MS/MS	0.23487	0.41796	36.691	6	3	Median	0.19265	0.32253	70.962	6	3	Median	0.72946	0.66383	54.842	6	3
E9BBQ9	E9BBQ9	1	1	1			tr|E9BBQ9|E9BBQ9_LEIDB Uncharacterized protein OS=Leishmania donovani (strain BPK282A1) GN=LDBPK_140240 PE=4 SV=1	non-human	1	1	1	1	0	0	1	0	0	1	0	0	1	8.5	8.5	8.5	15.27	142	142	0.0010256	2.8619			By MS/MS	NaN	NaN	NaN	1	1	Median	NaN	NaN	NaN	1	1	Median	NaN	NaN	NaN	1	1
E9BBT1	E9BBT1	2	2	2			tr|E9BBT1|E9BBT1_LEIDB Uncharacterized protein OS=Leishmania donovani (strain BPK282A1) GN=LDBPK_140460 PE=4 SV=1	non-human	1	2	2	2	0	0	2	0	0	2	0	0	2	9.9	9.9	9.9	36.335	322	322	0	14.865			By MS/MS	NaN	NaN	NaN	1	1	Median	NaN	NaN	NaN	1	1	Median	NaN	NaN	NaN	1	1
E9BBV2	E9BBV2	1	1	1			tr|E9BBV2|E9BBV2_LEIDB Elongation of fatty acids protein OS=Leishmania donovani (strain BPK282A1) GN=LDBPK_140670 PE=3 SV=1	non-human	1	1	1	1	0	1	1	0	1	1	0	1	1	3.2	3.2	3.2	32.368	285	285	0.0079681	1.8233		By MS/MS	By MS/MS	NaN	NaN	NaN	1	1	Median	NaN	NaN	NaN	1	1	Median	NaN	NaN	NaN	1	1
E9BBV3	E9BBV3	1	1	1			tr|E9BBV3|E9BBV3_LEIDB Elongation of fatty acids protein OS=Leishmania donovani (strain BPK282A1) GN=LDBPK_140680 PE=3 SV=1	non-human	1	1	1	1	0	0	1	0	0	1	0	0	1	6.7	6.7	6.7	32.346	284	284	1	-2			By MS/MS	NaN	NaN	NaN	0	0	Median	NaN	NaN	NaN	0	0	Median	NaN	NaN	NaN	0	0
E9BBV5	E9BBV5	2	2	2			tr|E9BBV5|E9BBV5_LEIDB Elongation of fatty acids protein OS=Leishmania donovani (strain BPK282A1) GN=LDBPK_140700 PE=3 SV=1	non-human	1	2	2	2	1	2	2	1	2	2	1	2	2	5.8	5.8	5.8	32.846	294	294	0	5.6179	By MS/MS	By MS/MS	By MS/MS	0.27608	0.56013	29.506	3	3	Median	0.32458	0.61353	9.9296	3	3	Plateau	1.2084	1.0967	27.912	3	3
E9BBW9	E9BBW9	1	1	1			tr|E9BBW9|E9BBW9_LEIDB Uncharacterized protein OS=Leishmania donovani (strain BPK282A1) GN=LDBPK_140860 PE=4 SV=1	non-human	1	1	1	1	0	0	1	0	0	1	0	0	1	4.7	4.7	4.7	42.427	429	429	0.00035448	3.3016			By MS/MS	NaN	NaN	NaN	1	1	Median	NaN	NaN	NaN	1	1	Median	NaN	NaN	NaN	1	1
E9BBX4	E9BBX4	7	7	7			tr|E9BBX4|E9BBX4_LEIDB Calpain-like cysteine peptidase, putative OS=Leishmania donovani (strain BPK282A1) GN=LDBPK_140910 PE=4 SV=1	non-human	1	7	7	7	2	4	7	2	4	7	2	4	7	59.1	59.1	59.1	12.931	115	115	0	31.071	By MS/MS	By MS/MS	By MS/MS	0.21329	0.33801	41.559	14	11	Median	0.23469	0.31065	33.524	14	11	Median	1.0716	0.88523	32.836	14	11
E9BBY1	E9BBY1	1	1	1			tr|E9BBY1|E9BBY1_LEIDB Immunodominant antigen, putative OS=Leishmania donovani (strain BPK282A1) GN=LDBPK_140990 PE=4 SV=1	non-human	1	1	1	1	0	0	1	0	0	1	0	0	1	1.7	1.7	1.7	91.472	861	861	0.004172	2.2054			By MS/MS	NaN	NaN	NaN	0	0	Median	NaN	NaN	NaN	0	0	Median	NaN	NaN	NaN	0	0
E9BBY5	E9BBY5	2	2	2			tr|E9BBY5|E9BBY5_LEIDB Uncharacterized protein OS=Leishmania donovani (strain BPK282A1) GN=LDBPK_141030 PE=4 SV=1	non-human	1	2	2	2	2	1	1	2	1	1	2	1	1	8.7	8.7	8.7	31.594	287	287	0	4.2782	By MS/MS	By MS/MS	By MS/MS	0.22174	0.33823	20.399	2	2	Median	0.17075	0.25342	9.7283	2	2	Median	0.77001	0.74932	9.5698	2	2
E9BC06	E9BC06	16	16	16			tr|E9BC06|E9BC06_LEIDB Enolase OS=Leishmania donovani (strain BPK282A1) GN=LDBPK_141240 PE=3 SV=1	non-human	1	16	16	16	11	12	16	11	12	16	11	12	16	42.4	42.4	42.4	46.036	429	429	0	159.82	By MS/MS	By MS/MS	By MS/MS	0.24695	0.3613	44.859	42	25	Leave out requantified	0.20652	0.27304	37.354	42	25	Leave out requantified	0.9514	0.8755	17.737	42	25
E9BC22	E9BC22	4	4	4			tr|E9BC22|E9BC22_LEIDB Serine hydroxymethyltransferase OS=Leishmania donovani (strain BPK282A1) GN=LDBPK_141400 PE=3 SV=1	non-human	1	4	4	4	0	0	4	0	0	4	0	0	4	10.8	10.8	10.8	50.59	465	465	0	6.8994			By MS/MS	NaN	NaN	NaN	0	0	Median	NaN	NaN	NaN	0	0	Median	NaN	NaN	NaN	0	0
E9BC36	E9BC36	5	5	5			tr|E9BC36|E9BC36_LEIDB Uncharacterized protein (Fragment) OS=Leishmania donovani (strain BPK282A1) GN=LDBPK_141540 PE=4 SV=1	non-human	1	5	5	5	3	4	4	3	4	4	3	4	4	8.4	8.4	8.4	82.233	730	730	0	10.434	By MS/MS	By MS/MS	By MS/MS	0.38222	0.60741	133.73	10	10	Plateau	0.25122	0.41768	48.871	10	10	Median	0.93288	0.88552	163.98	10	10
E9BC68;REV__Q9HBT6	E9BC68;REV__Q9HBT6	2;1	2;1	2;1			tr|E9BC68|E9BC68_LEIDB Lysine--tRNA ligase OS=Leishmania donovani (strain BPK282A1) GN=LDBPK_150270 PE=3 SV=1;sp|Q9HBT6|CAD20_HUMAN Cadherin-20 OS=Homo sapiens OX=9606 GN=CDH20 PE=2 SV=2	TRUE	2	2	2	2	0	0	2	0	0	2	0	0	2	2.9	2.9	2.9	67.188	586	586;801	0.0032626	2.4			By MS/MS	NaN	NaN	NaN	1	1	Median	NaN	NaN	NaN	1	1	Median	NaN	NaN	NaN	1	1
E9BC72	E9BC72	1	1	1			tr|E9BC72|E9BC72_LEIDB Replication Factor A 28 kDa subunit, putative OS=Leishmania donovani (strain BPK282A1) GN=LDBPK_150310 PE=4 SV=1	non-human	1	1	1	1	0	1	0	0	1	0	0	1	0	4.7	4.7	4.7	27.55	257	257	0.0029412	2.414		By MS/MS		NaN	NaN	NaN	1	0	Median	NaN	NaN	NaN	1	0	Median	NaN	NaN	NaN	1	0
E9BC74;E9BC73	E9BC74	7;1	7;1	7;1			tr|E9BC74|E9BC74_LEIDB Ribonucleoprotein p18, mitochondrial, putative OS=Leishmania donovani (strain BPK282A1) GN=LDBPK_150330 PE=4 SV=1	non-human	2	7	7	7	4	5	5	4	5	5	4	5	5	27.8	27.8	27.8	21.288	187	187;86	0	62.023	By MS/MS	By MS/MS	By MS/MS	0.11316	0.18218	31.322	6	6	Median	0.1512	0.22531	103.16	6	6	Median	1.5053	1.3375	113.63	6	6
E9BC93	E9BC93	1	1	1			tr|E9BC93|E9BC93_LEIDB Katanin-like protein OS=Leishmania donovani (strain BPK282A1) GN=LDBPK_150520 PE=3 SV=1	non-human	1	1	1	1	1	1	1	1	1	1	1	1	1	1.2	1.2	1.2	105.87	1002	1002	0.004127	2.1186	By MS/MS	By MS/MS	By MS/MS	0.75722	1.0748	16.304	5	5	Median	0.62151	0.80299	11.489	5	5	Median	0.84465	0.87562	7.8115	5	5
E9BCE5	E9BCE5	32	32	32			tr|E9BCE5|E9BCE5_LEIDB Glutamate dehydrogenase OS=Leishmania donovani (strain BPK282A1) GN=LDBPK_151070 PE=4 SV=1	non-human	1	32	32	32	10	15	27	10	15	27	10	15	27	41	41	41	115.12	1020	1020	0	128.17	By MS/MS	By MS/MS	By MS/MS	0.28628	0.49327	54.17	40	38	Median	0.2188	0.36011	72.017	37	35	Median	0.88032	0.79135	83.255	37	35
E9BCF2;E9BCF0	E9BCF2;E9BCF0	8;7	8;7	8;7			tr|E9BCF2|E9BCF2_LEIDB Tryparedoxin peroxidase OS=Leishmania donovani (strain BPK282A1) GN=LDBPK_151140 PE=4 SV=1;tr|E9BCF0|E9BCF0_LEIDB Tryparedoxin peroxidase OS=Leishmania donovani (strain BPK282A1) GN=LDBPK_151120 PE=4 SV=1	non-human	2	8	8	8	7	6	7	7	6	7	7	6	7	41.7	41.7	41.7	22.179	199	199;113	0	25.201	By MS/MS	By MS/MS	By MS/MS	0.22396	0.38695	63.758	24	8	Leave out requantified	0.20747	0.34819	86.624	24	7	Leave out requantified	0.97453	0.93122	79.543	22	7
E9BCF8;E9BCF7	E9BCF8;E9BCF7	3;2	3;2	3;2			tr|E9BCF8|E9BCF8_LEIDB 60S acidic ribosomal protein P2 OS=Leishmania donovani (strain BPK282A1) GN=LDBPK_151200 PE=3 SV=1;tr|E9BCF7|E9BCF7_LEIDB 60S acidic ribosomal protein P2 OS=Leishmania donovani (strain BPK282A1) GN=LDBPK_151190 PE=3 SV=1	non-human	2	3	3	3	2	2	3	2	2	3	2	2	3	49.5	49.5	49.5	10.954	111	111;111	0	8.8483	By MS/MS	By MS/MS	By MS/MS	0.1246	0.29427	70.57	4	3	Linear	0.19963	0.25966	2.906	2	1	Median	NaN	NaN	NaN	1	1
E9BCI2	E9BCI2	3	3	3			tr|E9BCI2|E9BCI2_LEIDB Nucleolar RNA binding protein, putative OS=Leishmania donovani (strain BPK282A1) GN=LDBPK_151430 PE=4 SV=1	non-human	1	3	3	3	0	0	3	0	0	3	0	0	3	9.9	9.9	9.9	48.906	445	445	0	15.401			By MS/MS	0.33532	0.52012	50.653	3	3	Median	NaN	NaN	NaN	1	1	Median	NaN	NaN	NaN	1	1
E9BCJ2	E9BCJ2	2	2	2			tr|E9BCJ2|E9BCJ2_LEIDB Ribosomal protein S6, putative OS=Leishmania donovani (strain BPK282A1) GN=LDBPK_151530 PE=4 SV=1	non-human	1	2	2	2	2	1	2	2	1	2	2	1	2	27	27	27	13.516	126	126	0	19.027	By MS/MS	By MS/MS	By MS/MS	0.11775	0.17457	24.972	2	2	Median	0.27585	0.35759	28.04	2	2	Median	2.3427	2.0478	54.901	2	2
E9BCM8	E9BCM8	1	1	1			tr|E9BCM8|E9BCM8_LEIDB Protein tyrosine phosphatase-like protein OS=Leishmania donovani (strain BPK282A1) GN=LDBPK_160240 PE=4 SV=1	non-human	1	1	1	1	0	1	0	0	1	0	0	1	0	12	12	12	19.431	175	175	0.0035576	2.2834		By MS/MS		NaN	NaN	NaN	1	1	Median	NaN	NaN	NaN	1	1	Median	NaN	NaN	NaN	1	1
E9BCQ6	E9BCQ6	1	1	1			tr|E9BCQ6|E9BCQ6_LEIDB Uncharacterized protein OS=Leishmania donovani (strain BPK282A1) GN=LDBPK_160530 PE=4 SV=1	non-human	1	1	1	1	0	1	0	0	1	0	0	1	0	7.3	7.3	7.3	36.773	328	328	0.0096794	1.7346		By MS/MS		NaN	NaN	NaN	0	0	Median	NaN	NaN	NaN	0	0	Median	NaN	NaN	NaN	0	0
E9BCQ9	E9BCQ9	2	2	2			tr|E9BCQ9|E9BCQ9_LEIDB Orotidine-5-phosphate decarboxylase/orotate phosphoribosyltransferase, putative OS=Leishmania donovani (strain BPK282A1) GN=LDBPK_160560 PE=1 SV=1	non-human	1	2	2	2	2	2	2	2	2	2	2	2	2	6.1	6.1	6.1	49.709	457	457	0	17.254	By MS/MS	By MS/MS	By MS/MS	0.25314	0.406	23.157	7	4	Median	0.24763	0.37332	22.511	7	4	Median	0.88827	0.81642	26.228	7	4
E9BCS9	E9BCS9	7	5	5			tr|E9BCS9|E9BCS9_LEIDB Transaldolase OS=Leishmania donovani (strain BPK282A1) GN=LDBPK_160760 PE=3 SV=1	non-human	1	7	5	5	3	3	7	1	1	5	1	1	5	28.8	23.9	23.9	36.953	330	330	0	10.251	By MS/MS	By MS/MS	By MS/MS	0.31136	0.64137	12.182	5	4	Median	0.46066	0.90167	69.143	4	3	Median	1.5625	1.4408	68.489	4	3
E9BCX7	E9BCX7	1	1	1			tr|E9BCX7|E9BCX7_LEIDB Coatomer delta subunit-like protein OS=Leishmania donovani (strain BPK282A1) GN=LDBPK_161230 PE=4 SV=1	non-human	1	1	1	1	0	0	1	0	0	1	0	0	1	2.8	2.8	2.8	57.782	536	536	0.0023049	2.4818			By MS/MS	NaN	NaN	NaN	0	0	Median	NaN	NaN	NaN	0	0	Median	NaN	NaN	NaN	0	0
E9BCZ1;E9BCZ0	E9BCZ1;E9BCZ0	1;1	1;1	1;1			tr|E9BCZ1|E9BCZ1_LEIDB Cytochrome c, putative OS=Leishmania donovani (strain BPK282A1) GN=LDBPK_161390 PE=3 SV=1;tr|E9BCZ0|E9BCZ0_LEIDB Cytochrome c, putative OS=Leishmania donovani (strain BPK282A1) GN=LDBPK_161380 PE=3 SV=1	non-human	2	1	1	1	1	1	1	1	1	1	1	1	1	9.7	9.7	9.7	12.151	113	113;220	0	3.5774	By MS/MS	By MS/MS	By MS/MS	NaN	NaN	NaN	1	1	Median	NaN	NaN	NaN	1	1	Median	NaN	NaN	NaN	1	1
E9BD03	E9BD03	10	10	10			tr|E9BD03|E9BD03_LEIDB Paraflagellar rod protein 2C OS=Leishmania donovani (strain BPK282A1) GN=LDBPK_161510 PE=4 SV=1	non-human	1	10	10	10	6	9	7	6	9	7	6	9	7	22.5	22.5	22.5	68.902	599	599	0	47.517	By MS/MS	By MS/MS	By MS/MS	0.33267	0.53614	88.121	16	16	Median	0.13404	0.19826	106.98	12	12	Median	0.42561	0.37076	156.34	12	12
E9BD22	E9BD22	4	4	4			tr|E9BD22|E9BD22_LEIDB Prohibitin OS=Leishmania donovani (strain BPK282A1) GN=LDBPK_161710 PE=4 SV=1	non-human	1	4	4	4	0	2	3	0	2	3	0	2	3	13.1	13.1	13.1	30.23	268	268	0	4.659		By MS/MS	By MS/MS	1.4303	2.7453	231.48	2	2	Median	0.37233	0.684	6.0661	2	2	Median	0.26032	0.24713	226.12	2	2
E9BD28	E9BD28	6	6	6			tr|E9BD28|E9BD28_LEIDB Uncharacterized protein OS=Leishmania donovani (strain BPK282A1) GN=LDBPK_170010 PE=4 SV=1	non-human	1	6	6	6	1	2	6	1	2	6	1	2	6	9.6	9.6	9.6	87.604	774	774	0	38.217	By MS/MS	By MS/MS	By MS/MS	0.2769	0.50853	20.089	8	7	Median	0.26124	0.53006	43.216	8	7	Median	1.0809	1.0257	28.992	8	7
E9BD51	E9BD51	3	3	3			tr|E9BD51|E9BD51_LEIDB Cystathionine beta-synthase OS=Leishmania donovani (strain BPK282A1) GN=LDBPK_170300 PE=4 SV=1	non-human	1	3	3	3	1	0	3	1	0	3	1	0	3	12.3	12.3	12.3	39.128	359	359	0	9.6984	By MS/MS		By MS/MS	NaN	NaN	NaN	1	1	Median	NaN	NaN	NaN	1	1	Median	NaN	NaN	NaN	1	1
E9BD91;E9BD89	E9BD91;E9BD89	2;2	2;2	2;2			tr|E9BD91|E9BD91_LEIDB Uncharacterized protein OS=Leishmania donovani (strain BPK282A1) GN=LDBPK_170700 PE=4 SV=1;tr|E9BD89|E9BD89_LEIDB Uncharacterized protein OS=Leishmania donovani (strain BPK282A1) GN=LDBPK_170680 PE=4 SV=1	non-human	2	2	2	2	1	2	1	1	2	1	1	2	1	21.9	21.9	21.9	10.63	96	96;103	0	15.5	By MS/MS	By MS/MS	By MS/MS	0.49332	0.90105	17.785	2	1	Median	0.40059	0.68307	27.818	2	1	Median	0.8326	0.75792	10.52	2	1
E9BDB8	E9BDB8	1	1	1			tr|E9BDB8|E9BDB8_LEIDB Uncharacterized protein OS=Leishmania donovani (strain BPK282A1) GN=LDBPK_170970 PE=4 SV=1	non-human	1	1	1	1	0	0	1	0	0	1	0	0	1	4.3	4.3	4.3	48.383	444	444	0	11.892			By MS/MS	NaN	NaN	NaN	1	0	Median	NaN	NaN	NaN	1	0	Median	NaN	NaN	NaN	1	0
E9BDC0	E9BDC0	1	1	1			tr|E9BDC0|E9BDC0_LEIDB Uncharacterized protein OS=Leishmania donovani (strain BPK282A1) GN=LDBPK_170990 PE=4 SV=1	non-human	1	1	1	1	1	1	1	1	1	1	1	1	1	8.9	8.9	8.9	12.076	112	112	0.0041481	2.1543	By MS/MS	By MS/MS	By MS/MS	1.1791	2.3915	13.846	3	1	Plateau	0.48259	0.90026	38.892	3	1	Plateau	0.50482	0.4031	27.128	3	1
E9BDG0	E9BDG0	2	2	2			tr|E9BDG0|E9BDG0_LEIDB Uncharacterized protein OS=Leishmania donovani (strain BPK282A1) GN=LDBPK_171380 PE=4 SV=1	non-human	1	2	2	2	2	2	1	2	2	1	2	2	1	40.3	40.3	40.3	7.954	67	67	0	18.245	By MS/MS	By MS/MS	By MS/MS	0.13676	0.21953	91.685	5	3	Median	0.1449	0.21416	103.72	5	3	Median	1.0595	0.92118	40.149	5	3
E9BDG1	E9BDG1	3	3	3			tr|E9BDG1|E9BDG1_LEIDB Translation initiation factor, putative OS=Leishmania donovani (strain BPK282A1) GN=LDBPK_171390 PE=4 SV=1	non-human	1	3	3	3	0	0	3	0	0	3	0	0	3	5.4	5.4	5.4	80.81	709	709	0	5.624			By MS/MS	NaN	NaN	NaN	1	1	Median	NaN	NaN	NaN	0	0	Median	NaN	NaN	NaN	0	0
E9BDK2	E9BDK2	4	4	4			tr|E9BDK2|E9BDK2_LEIDB Uncharacterized protein OS=Leishmania donovani (strain BPK282A1) GN=LDBPK_180210 PE=4 SV=1	non-human	1	4	4	4	1	1	4	1	1	4	1	1	4	13.4	13.4	13.4	38.448	351	351	0	10.031	By MS/MS	By MS/MS	By MS/MS	0.31271	0.45837	9.892	5	3	Median	0.29398	0.3898	17.469	3	1	Median	0.9411	0.79097	19.686	3	1
E9BDK3	E9BDK3	1	1	1			tr|E9BDK3|E9BDK3_LEIDB RNA-binding protein, putative OS=Leishmania donovani (strain BPK282A1) GN=LDBPK_180220 PE=4 SV=1	non-human	1	1	1	1	1	1	1	1	1	1	1	1	1	2.4	2.4	2.4	43.476	409	409	0.00036062	3.4793	By MS/MS	By MS/MS	By MS/MS	0.20661	0.30952	19.559	2	1	Median	0.3925	0.5231	55.306	2	1	Median	1.7331	1.5199	85.021	2	1
E9BDK8	E9BDK8	2	2	2			tr|E9BDK8|E9BDK8_LEIDB Protein kinase, putative OS=Leishmania donovani (strain BPK282A1) GN=LDBPK_180270 PE=4 SV=1	non-human	1	2	2	2	0	0	2	0	0	2	0	0	2	5.4	5.4	5.4	40.736	355	355	0.0029431	2.4169			By MS/MS	NaN	NaN	NaN	1	0	Median	NaN	NaN	NaN	1	0	Median	NaN	NaN	NaN	1	0
E9BDN2	E9BDN2	19	19	19			tr|E9BDN2|E9BDN2_LEIDB Aconitate hydratase OS=Leishmania donovani (strain BPK282A1) GN=LDBPK_180510 PE=3 SV=1	non-human	1	19	19	19	6	8	19	6	8	19	6	8	19	30.6	30.6	30.6	97.452	896	896	0	90.742	By MS/MS	By MS/MS	By MS/MS	0.36249	0.56371	59.634	29	26	Leave out requantified	0.21683	0.38297	20.517	27	24	Leave out requantified	1.0523	0.88697	47.472	27	24
E9BDP7	E9BDP7	2	2	2			tr|E9BDP7|E9BDP7_LEIDB Uncharacterized protein OS=Leishmania donovani (strain BPK282A1) GN=LDBPK_180670 PE=4 SV=1	non-human	1	2	2	2	0	0	2	0	0	2	0	0	2	4.9	4.9	4.9	77.233	711	711	0	16.782			By MS/MS	NaN	NaN	NaN	1	0	Median	NaN	NaN	NaN	1	0	Median	NaN	NaN	NaN	1	0
E9BDQ0	E9BDQ0	6	6	6			tr|E9BDQ0|E9BDQ0_LEIDB Citrate synthase (Fragment) OS=Leishmania donovani (strain BPK282A1) GN=LDBPK_180700 PE=3 SV=1	non-human	1	6	6	6	2	3	6	2	3	6	2	3	6	30.5	30.5	30.5	33.749	308	308	0	53.351	By MS/MS	By MS/MS	By MS/MS	0.22671	0.35889	33.618	8	7	Median	0.21936	0.3616	22.829	7	6	Median	1.2177	1.0188	47.292	7	6
E9BDQ4	E9BDQ4	5	5	5			tr|E9BDQ4|E9BDQ4_LEIDB Elongation factor Tu, putative OS=Leishmania donovani (strain BPK282A1) GN=LDBPK_180740 PE=4 SV=1	non-human	1	5	5	5	2	1	5	2	1	5	2	1	5	15.5	15.5	15.5	51.523	466	466	0	25.506	By MS/MS	By MS/MS	By MS/MS	0.2109	0.31402	49.901	4	4	Median	0.14649	0.18992	89.388	3	3	Plateau	1.0407	0.8763	33.578	3	3
E9BDR2	E9BDR2	2	2	2			tr|E9BDR2|E9BDR2_LEIDB Uncharacterized protein OS=Leishmania donovani (strain BPK282A1) GN=LDBPK_180820 PE=4 SV=1	non-human	1	2	2	2	0	0	2	0	0	2	0	0	2	1.2	1.2	1.2	289.96	2661	2661	0	3.8967			By MS/MS	NaN	NaN	NaN	1	1	Median	NaN	NaN	NaN	1	1	Median	NaN	NaN	NaN	1	1
E9BDS9	E9BDS9	1	1	1			tr|E9BDS9|E9BDS9_LEIDB UDP-glucose pyrophosphorylase OS=Leishmania donovani (strain BPK282A1) GN=LDBPK_180990 PE=4 SV=1	non-human	1	1	1	1	0	0	1	0	0	1	0	0	1	3.2	3.2	3.2	54.378	494	494	0	4.3981			By MS/MS	NaN	NaN	NaN	0	0	Median	NaN	NaN	NaN	0	0	Median	NaN	NaN	NaN	0	0
E9BDV2	E9BDV2	1	1	1			tr|E9BDV2|E9BDV2_LEIDB Prolyl-tRNA synthetase, putative (Fragment) OS=Leishmania donovani (strain BPK282A1) GN=LDBPK_181220 PE=4 SV=1	non-human	1	1	1	1	0	0	1	0	0	1	0	0	1	3.3	3.3	3.3	39.181	361	361	0.0016706	2.603			By MS/MS	NaN	NaN	NaN	0	0	Median	NaN	NaN	NaN	0	0	Median	NaN	NaN	NaN	0	0
E9BDV8;E9BDV7	E9BDV8;E9BDV7	4;3	4;3	4;3			tr|E9BDV8|E9BDV8_LEIDB Uncharacterized protein OS=Leishmania donovani (strain BPK282A1) GN=LDBPK_081680 PE=3 SV=1;tr|E9BDV7|E9BDV7_LEIDB Uncharacterized protein (Fragment) OS=Leishmania donovani (strain BPK282A1) GN=LDBPK_181270 PE=3 SV=1	non-human	2	4	4	4	0	1	4	0	1	4	0	1	4	16.9	16.9	16.9	33.259	308	308;248	0	5.4734		By MS/MS	By MS/MS	0.2577	0.51921	26.791	4	4	Median	0.3831	0.73622	53.732	4	4	Median	1.4918	1.3808	69.599	4	4
E9BDW6	E9BDW6	12	12	12			tr|E9BDW6|E9BDW6_LEIDB Heat shock protein, putative OS=Leishmania donovani (strain BPK282A1) GN=LDBPK_181350 PE=3 SV=1	non-human	1	12	12	12	7	5	12	7	5	12	7	5	12	20.4	20.4	20.4	91.74	822	822	0	61.074	By MS/MS	By MS/MS	By MS/MS	0.31948	0.68011	39.466	20	10	Leave out requantified	0.35989	0.5894	35.557	20	10	Leave out requantified	0.90685	0.88715	6.0407	20	10
E9BDW7	E9BDW7	6	6	6			tr|E9BDW7|E9BDW7_LEIDB Pyruvate dehydrogenase E1 component alpha subunit, putative OS=Leishmania donovani (strain BPK282A1) GN=LDBPK_181360 PE=4 SV=1	non-human	1	6	6	6	5	5	5	5	5	5	5	5	5	22.5	22.5	22.5	42.719	378	378	0	15.546	By MS/MS	By MS/MS	By MS/MS	0.24966	0.51787	61.663	12	12	Median	0.17869	0.33862	74.297	10	10	Median	0.74239	0.70081	44.613	10	10
E9BDY2	E9BDY2	2	2	2			tr|E9BDY2|E9BDY2_LEIDB Plasma membrane ATPase OS=Leishmania donovani (strain BPK282A1) GN=LDBPK_181510 PE=3 SV=1	non-human	1	2	2	2	0	0	2	0	0	2	0	0	2	2.5	2.5	2.5	107.34	974	974	0	4.774			By MS/MS	NaN	NaN	NaN	1	1	Median	NaN	NaN	NaN	1	1	Median	NaN	NaN	NaN	1	1
E9BDY8	E9BDY8	4	4	4			tr|E9BDY8|E9BDY8_LEIDB Nonspecific nucleoside hydrolasewith=GeneDB:LmjF18.1580 OS=Leishmania donovani (strain BPK282A1) GN=LDBPK_181570 PE=4 SV=1	non-human	1	4	4	4	1	1	3	1	1	3	1	1	3	17.5	17.5	17.5	34.238	314	314	0	19.096	By MS/MS	By MS/MS	By MS/MS	0.3657	0.5283	47.979	2	2	Median	NaN	NaN	NaN	0	0	Median	NaN	NaN	NaN	0	0
E9BE00	E9BE00	2	2	2			tr|E9BE00|E9BE00_LEIDB Uncharacterized protein OS=Leishmania donovani (strain BPK282A1) GN=LDBPK_190020 PE=4 SV=1	non-human	1	2	2	2	0	0	2	0	0	2	0	0	2	21.4	21.4	21.4	27.91	257	257	0	22.097			By MS/MS	0.27115	0.58089	5.519	2	1	Median	0.29449	0.56849	23.607	2	1	Median	1.1092	1.0254	8.026	2	1
E9BE05	E9BE05	1	1	1			tr|E9BE05|E9BE05_LEIDB Fibrillarin, putative OS=Leishmania donovani (strain BPK282A1) GN=LDBPK_190090 PE=3 SV=1	non-human	1	1	1	1	1	1	1	1	1	1	1	1	1	3.7	3.7	3.7	31.343	299	299	0.0016767	2.6555	By MS/MS	By MS/MS	By MS/MS	0.23032	0.36819	23.635	3	3	Median	0.17336	0.21829	17.992	3	3	Median	0.64575	0.59436	40.434	3	3
E9BE11	E9BE11	3	3	3			tr|E9BE11|E9BE11_LEIDB Aminopeptidase, putative OS=Leishmania donovani (strain BPK282A1) GN=LDBPK_190150 PE=4 SV=1	non-human	1	3	3	3	1	0	3	1	0	3	1	0	3	12.6	12.6	12.6	42.529	380	380	0	18.744	By MS/MS		By MS/MS	0.29926	0.58912	16.162	2	2	Median	0.1817	0.31579	42.293	2	2	Median	0.60717	0.53948	58.424	2	2
E9BE14	E9BE14	1	1	1			tr|E9BE14|E9BE14_LEIDB Uncharacterized protein OS=Leishmania donovani (strain BPK282A1) GN=LDBPK_190180 PE=4 SV=1	non-human	1	1	1	1	0	1	0	0	1	0	0	1	0	8	8	8	18.389	163	163	0.0071406	1.9103		By MS/MS		NaN	NaN	NaN	1	1	Median	NaN	NaN	NaN	1	1	Median	NaN	NaN	NaN	1	1
E9BE16;E9BE15	E9BE16	9;4	8;4	8;4			tr|E9BE16|E9BE16_LEIDB ADP,ATP carrier protein 1, mitochondrial, putative OS=Leishmania donovani (strain BPK282A1) GN=LDBPK_190200 PE=3 SV=1	non-human	2	9	8	8	7	9	8	6	8	7	6	8	7	29.3	29.3	29.3	35.154	317	317;103	0	40.212	By MS/MS	By MS/MS	By MS/MS	0.13608	0.23932	53.985	24	14	Leave out requantified	0.14422	0.23472	48.229	24	14	Leave out requantified	1.0518	1.0278	22.219	24	14
E9BE21	E9BE21	3	3	3			tr|E9BE21|E9BE21_LEIDB Kinesin-like protein OS=Leishmania donovani (strain BPK282A1) GN=LDBPK_190250 PE=3 SV=1	non-human	1	3	3	3	0	0	3	0	0	3	0	0	3	5.8	5.8	5.8	93.724	841	841	0	11.707			By MS/MS	0.38806	0.69055	32.019	2	2	Median	NaN	NaN	NaN	1	1	Median	NaN	NaN	NaN	1	1
E9BE66	E9BE66	2	2	2			tr|E9BE66|E9BE66_LEIDB Glycosomal malate dehydrogenase OS=Leishmania donovani (strain BPK282A1) GN=LDBPK_190710 PE=3 SV=1	non-human	1	2	2	2	1	2	1	1	2	1	1	2	1	15.2	15.2	15.2	33.592	322	322	0	6.626	By MS/MS	By MS/MS	By MS/MS	0.36838	0.74531	14.171	4	1	Median	0.32846	0.70379	44.135	4	1	Median	1.0193	0.99191	42.343	4	1
E9BE87	E9BE87	2	2	2			tr|E9BE87|E9BE87_LEIDB 4-coumarate:coa ligase-like protein OS=Leishmania donovani (strain BPK282A1) GN=LDBPK_190940 PE=4 SV=1	non-human	1	2	2	2	1	2	2	1	2	2	1	2	2	5.2	5.2	5.2	66.45	612	612	0	7.9447	By MS/MS	By MS/MS	By MS/MS	0.29849	0.4774	25.415	5	4	Median	0.42475	0.84479	48.011	4	3	Linear	1.3728	1.2681	26.034	4	3
E9BE90	E9BE90	2	2	2			tr|E9BE90|E9BE90_LEIDB 4-coumarate:coa ligase-like protein OS=Leishmania donovani (strain BPK282A1) GN=LDBPK_190970 PE=4 SV=1	non-human	1	2	2	2	0	0	2	0	0	2	0	0	2	5.5	5.5	5.5	66.105	603	603	0	9.1289			By MS/MS	0.31385	0.49319	39.808	2	1	Median	NaN	NaN	NaN	1	0	Median	NaN	NaN	NaN	1	0
E9BEA2	E9BEA2	2	2	2			tr|E9BEA2|E9BEA2_LEIDB Proteasome regulatory non-ATP-ase subunit, putative OS=Leishmania donovani (strain BPK282A1) GN=LDBPK_191100 PE=4 SV=1	non-human	1	2	2	2	0	0	2	0	0	2	0	0	2	4.6	4.6	4.6	46.62	412	412	0	3.6955			By MS/MS	NaN	NaN	NaN	1	1	Median	NaN	NaN	NaN	1	1	Median	NaN	NaN	NaN	1	1
E9BEA7	E9BEA7	5	5	5			tr|E9BEA7|E9BEA7_LEIDB Uncharacterized protein OS=Leishmania donovani (strain BPK282A1) GN=LDBPK_191150 PE=4 SV=1	non-human	1	5	5	5	2	3	5	2	3	5	2	3	5	19.1	19.1	19.1	41.392	371	371	0	29.298	By MS/MS	By MS/MS	By MS/MS	0.15617	0.31692	81.757	8	5	Leave out requantified	0.17484	0.33577	43.785	6	3	Leave out requantified	1.3453	1.1234	47.005	6	3
E9BED5	E9BED5	2	2	2			tr|E9BED5|E9BED5_LEIDB Cysteine peptidase A (CBA) OS=Leishmania donovani (strain BPK282A1) GN=LDBPK_191460 PE=3 SV=1	non-human	1	2	2	2	1	2	2	1	2	2	1	2	2	8.5	8.5	8.5	38.902	354	354	0	7.1415	By MS/MS	By MS/MS	By MS/MS	0.28911	0.42436	22.657	4	4	Median	0.32212	0.45557	45.953	2	2	Median	1.2878	1.1583	74.516	2	2
E9BEE5	E9BEE5	5	5	5			tr|E9BEE5|E9BEE5_LEIDB Peptidylprolyl isomerase-like protein OS=Leishmania donovani (strain BPK282A1) GN=LDBPK_191560 PE=4 SV=1	non-human	1	5	5	5	2	4	5	2	4	5	2	4	5	13.9	13.9	13.9	47.823	432	432	0	13.154	By MS/MS	By MS/MS	By MS/MS	0.41865	0.66293	38.479	10	7	Median	0.3581	0.51474	35.998	10	7	Median	0.99078	0.8598	24.821	10	7
E9BEE9	E9BEE9	1	1	1			tr|E9BEE9|E9BEE9_LEIDB Inosine-5-monophosphate dehydrogenase OS=Leishmania donovani (strain BPK282A1) GN=LDBPK_191590 PE=3 SV=1	non-human	1	1	1	1	0	0	1	0	0	1	0	0	1	2.1	2.1	2.1	55.551	514	514	0.0041667	2.1863			By MS/MS	NaN	NaN	NaN	1	0	Median	NaN	NaN	NaN	1	0	Median	NaN	NaN	NaN	1	0
E9BEP5	E9BEP5	2	2	2			tr|E9BEP5|E9BEP5_LEIDB Uncharacterized protein OS=Leishmania donovani (strain BPK282A1) GN=LDBPK_200980 PE=3 SV=1	non-human	1	2	2	2	0	0	2	0	0	2	0	0	2	8.7	8.7	8.7	39.068	344	344	0	5.7203			By MS/MS	0.3458	0.62196	62.923	2	1	Median	0.29063	0.46502	72.271	2	1	Median	0.92882	0.81333	19.1	2	1
E9BEP7	E9BEP7	1	1	1			tr|E9BEP7|E9BEP7_LEIDB Uncharacterized protein OS=Leishmania donovani (strain BPK282A1) GN=LDBPK_351820 PE=4 SV=1	non-human	1	1	1	1	0	0	1	0	0	1	0	0	1	1.9	1.9	1.9	81.868	739	739	0.0041401	2.1444			By MS/MS	NaN	NaN	NaN	1	1	Median	NaN	NaN	NaN	0	0	Median	NaN	NaN	NaN	0	0
E9BET1	E9BET1	1	1	1			tr|E9BET1|E9BET1_LEIDB Calpain-like cysteine peptidase, putative OS=Leishmania donovani (strain BPK282A1) GN=LDBPK_201320 PE=4 SV=1	non-human	1	1	1	1	1	1	1	1	1	1	1	1	1	13.9	13.9	13.9	17.036	151	151	0	40.994	By MS/MS	By MS/MS	By MS/MS	0.53023	0.77927	36.685	2	1	Median	NaN	NaN	NaN	1	0	Median	NaN	NaN	NaN	0	0
E9BET4;E9BET3	E9BET4	4;1	4;1	4;1			tr|E9BET4|E9BET4_LEIDB Calpain-like cysteine peptidase, putative OS=Leishmania donovani (strain BPK282A1) GN=LDBPK_201350 PE=4 SV=1	non-human	2	4	4	4	2	2	3	2	2	3	2	2	3	18.3	18.3	18.3	15.026	131	131;136	0	10.925	By MS/MS	By MS/MS	By MS/MS	0.41691	0.88137	6.0491	8	4	Leave out requantified	0.45293	0.78579	15.905	8	4	Leave out requantified	1.0951	1.0218	14.191	8	4
E9BEU4	E9BEU4	1	1	1			tr|E9BEU4|E9BEU4_LEIDB Axoneme central apparatus protein, putative OS=Leishmania donovani (strain BPK282A1) GN=LDBPK_201450 PE=4 SV=1	non-human	1	1	1	1	0	0	1	0	0	1	0	0	1	5.5	5.5	5.5	55.177	510	510	0	10.571			By MS/MS	NaN	NaN	NaN	0	0	Median	NaN	NaN	NaN	0	0	Median	NaN	NaN	NaN	0	0
E9BEW0	E9BEW0	2	2	2			tr|E9BEW0|E9BEW0_LEIDB Phosphatase-like protein OS=Leishmania donovani (strain BPK282A1) GN=LDBPK_201610 PE=4 SV=1	non-human	1	2	2	2	0	0	2	0	0	2	0	0	2	16	16	16	23.503	213	213	0	7.9241			By MS/MS	0.43051	0.6639	31.469	3	2	Plateau	0.5277	0.63574	25.077	3	2	Plateau	1.1921	0.98673	10.509	3	2
E9BEY7;E9BEG0	E9BEY7	9;1	9;1	9;1			tr|E9BEY7|E9BEY7_LEIDB Phosphoglycerate kinase OS=Leishmania donovani (strain BPK282A1) GN=LDBPK_200110 PE=3 SV=1	non-human	2	9	9	9	3	3	7	3	3	7	3	3	7	26.3	26.3	26.3	51.327	479	479;107	0	43.23	By MS/MS	By MS/MS	By MS/MS	0.27085	0.42703	50.31	9	8	Median	0.37352	0.44982	70.738	8	7	Median	1.3672	1.2758	75.274	8	7
E9BF15;E9BF16	E9BF15	24;3	24;3	24;3			tr|E9BF15|E9BF15_LEIDB Hexokinase OS=Leishmania donovani (strain BPK282A1) GN=LDBPK_210300 PE=3 SV=1	non-human	2	24	24	24	15	23	18	15	23	18	15	23	18	60.7	60.7	60.7	51.734	471	471;321	0	174.11	By MS/MS	By MS/MS	By MS/MS	0.081358	0.12909	58.111	41	34	Leave out requantified	0.085568	0.13498	28.441	34	27	Leave out requantified	1.2334	1.0821	46.416	34	27
E9BF25	E9BF25	8	8	8			tr|E9BF25|E9BF25_LEIDB Mitochondrial processing peptidase alpha subunit, putative OS=Leishmania donovani (strain BPK282A1) GN=LDBPK_210400 PE=4 SV=1	non-human	1	8	8	8	2	4	5	2	4	5	2	4	5	29.1	29.1	29.1	51.266	467	467	0	27.796	By MS/MS	By MS/MS	By MS/MS	0.31094	0.61893	58.03	9	9	Median	0.35154	0.64685	17.66	5	5	Median	0.96767	0.89324	75.869	5	5
E9BF34	E9BF34	5	5	5			tr|E9BF34|E9BF34_LEIDB Uncharacterized protein OS=Leishmania donovani (strain BPK282A1) GN=LDBPK_210490 PE=4 SV=1	non-human	1	5	5	5	4	3	5	4	3	5	4	3	5	14.3	14.3	14.3	46.581	413	413	0	16.795	By MS/MS	By MS/MS	By MS/MS	0.37098	0.76149	36.975	8	8	Median	0.48617	0.82359	38.262	8	8	Median	1.5577	1.3386	32.978	8	8
E9BF46	E9BF46	2	2	2			tr|E9BF46|E9BF46_LEIDB Dihydrolipoamide acetyltransferaselike protein OS=Leishmania donovani (strain BPK282A1) GN=LDBPK_210610 PE=4 SV=1	non-human	1	2	2	2	0	1	2	0	1	2	0	1	2	9.1	9.1	9.1	40.172	394	394	0	13.062		By MS/MS	By MS/MS	NaN	NaN	NaN	1	1	Median	NaN	NaN	NaN	1	1	Median	NaN	NaN	NaN	1	1
E9BS63;E9BF65	E9BS63;E9BF65	2;2	2;2	2;2			tr|E9BS63|E9BS63_LEIDB 60S Ribosomal protein L36, putative OS=Leishmania donovani (strain BPK282A1) GN=LDBPK_351900 PE=4 SV=1;tr|E9BF65|E9BF65_LEIDB 60S Ribosomal protein L36, putative OS=Leishmania donovani (strain BPK282A1) GN=LDBPK_210800 PE=4 SV=1	non-human	2	2	2	2	2	2	2	2	2	2	2	2	2	14.3	14.3	14.3	11.926	105	105;105	0	11.448	By MS/MS	By MS/MS	By MS/MS	0.13401	0.21961	26.783	5	4	Linear	0.10396	0.13099	61.115	5	4	Median	0.66564	0.60402	53.402	5	4
E9BF69	E9BF69	4	4	4			tr|E9BF69|E9BF69_LEIDB Proteasome regulatory non-ATP-ase subunit 5, putative OS=Leishmania donovani (strain BPK282A1) GN=LDBPK_210840 PE=4 SV=1	non-human	1	4	4	4	1	0	3	1	0	3	1	0	3	11.4	11.4	11.4	54.243	474	474	0	7.1668	By MS/MS		By MS/MS	0.47793	0.79763	54.807	2	2	Median	0.39026	0.60781	66.375	2	2	Median	0.81656	0.7754	6.323	2	2
E9BF75	E9BF75	3	3	3			tr|E9BF75|E9BF75_LEIDB Methionyl-tRNA synthetase, putative OS=Leishmania donovani (strain BPK282A1) GN=LDBPK_210890 PE=3 SV=1	non-human	1	3	3	3	1	1	3	1	1	3	1	1	3	6	6	6	84.166	747	747	0	11.618	By MS/MS	By MS/MS	By MS/MS	NaN	NaN	NaN	1	1	Median	NaN	NaN	NaN	1	1	Median	NaN	NaN	NaN	1	1
E9BFA8	E9BFA8	3	3	3			tr|E9BFA8|E9BFA8_LEIDB Uncharacterized protein OS=Leishmania donovani (strain BPK282A1) GN=LDBPK_211220 PE=4 SV=1	non-human	1	3	3	3	2	1	2	2	1	2	2	1	2	2.9	2.9	2.9	199.9	1800	1800	0	5.0842	By MS/MS	By MS/MS	By MS/MS	0.44085	0.7076	37.123	3	3	Plateau	0.38238	0.56185	24.854	3	3	Plateau	0.85989	0.80012	57.961	3	3
E9BFB5;E9BM82	E9BFB5;E9BM82	3;2	3;2	3;2			tr|E9BFB5|E9BFB5_LEIDB 60S ribosomal protein L9, putative OS=Leishmania donovani (strain BPK282A1) GN=LDBPK_211290 PE=4 SV=1;tr|E9BM82|E9BM82_LEIDB 60S ribosomal protein L9, putative (Fragment) OS=Leishmania donovani (strain BPK282A1) GN=LDBPK_303390 PE=4	non-human	2	3	3	3	2	3	3	2	3	3	2	3	3	16.8	16.8	16.8	21.529	190	190;92	0	5.8845	By MS/MS	By MS/MS	By MS/MS	0.18844	0.33133	39.49	6	6	Median	0.2079	0.32923	24.247	6	6	Median	0.878	0.83946	43.549	6	6
E9BFB6	E9BFB6	1	1	1			tr|E9BFB6|E9BFB6_LEIDB 40S ribosomal protein S23, putative OS=Leishmania donovani (strain BPK282A1) GN=LDBPK_211300 PE=3 SV=1	non-human	1	1	1	1	0	1	1	0	1	1	0	1	1	7.7	7.7	7.7	15.935	143	143	0.0038685	2.2582		By MS/MS	By MS/MS	NaN	NaN	NaN	1	1	Median	NaN	NaN	NaN	1	1	Median	NaN	NaN	NaN	1	1
E9BFB9	E9BFB9	3	3	3			tr|E9BFB9|E9BFB9_LEIDB T-complex protein 1 subunit delta OS=Leishmania donovani (strain BPK282A1) GN=LDBPK_211330 PE=3 SV=1	non-human	1	3	3	3	3	2	2	3	2	2	3	2	2	6.9	6.9	6.9	59.636	551	551	0	5.1774	By MS/MS	By MS/MS	By MS/MS	0.52866	1.1068	56.12	4	1	Median	0.68709	1.3968	37.839	4	1	Linear	1.0752	1.0435	25.859	4	1
E9BFD5	E9BFD5	1	1	1			tr|E9BFD5|E9BFD5_LEIDB Adenylate kinase, putative OS=Leishmania donovani (strain BPK282A1) GN=LDBPK_211490 PE=3 SV=1	non-human	1	1	1	1	0	0	1	0	0	1	0	0	1	5.6	5.6	5.6	30.031	269	269	0.0010373	2.9673			By MS/MS	NaN	NaN	NaN	1	1	Median	NaN	NaN	NaN	1	1	Median	NaN	NaN	NaN	1	1
E9BFE7	E9BFE7	1	1	1			tr|E9BFE7|E9BFE7_LEIDB Uncharacterized protein OS=Leishmania donovani (strain BPK282A1) GN=LDBPK_211610 PE=4 SV=1	non-human	1	1	1	1	0	0	1	0	0	1	0	0	1	4.2	4.2	4.2	38.406	356	356	0.0059394	1.9622			By MS/MS	NaN	NaN	NaN	1	1	Median	NaN	NaN	NaN	1	1	Median	NaN	NaN	NaN	1	1
E9BFG5	E9BFG5	1	1	1			tr|E9BFG5|E9BFG5_LEIDB 40S ribosomal protein S11, putative (Fragment) OS=Leishmania donovani (strain BPK282A1) GN=LDBPK_211790 PE=4 SV=1	non-human	1	1	1	1	1	1	1	1	1	1	1	1	1	58.8	58.8	58.8	3.9503	34	34	0	4.2254	By MS/MS	By MS/MS	By MS/MS	0.15751	0.24454	15.687	3	0	Median	0.10622	0.1408	24.801	3	0	Median	0.71007	0.61772	21.996	3	0
E9BFG8	E9BFG8	7	7	7			tr|E9BFG8|E9BFG8_LEIDB RNA helicase, putative OS=Leishmania donovani (strain BPK282A1) GN=LDBPK_211820 PE=4 SV=1	non-human	1	7	7	7	3	3	7	3	3	7	3	3	7	18.6	18.6	18.6	58.798	517	517	0	27.228	By MS/MS	By MS/MS	By MS/MS	0.30423	0.53855	89.011	10	9	Median	0.22692	0.36738	56.145	8	7	Median	0.85748	0.80712	93.958	8	7
E9BFG9	E9BFG9	5	5	5			tr|E9BFG9|E9BFG9_LEIDB Uncharacterized protein OS=Leishmania donovani (strain BPK282A1) GN=LDBPK_211830 PE=4 SV=1	non-human	1	5	5	5	4	5	4	4	5	4	4	5	4	16.2	16.2	16.2	46.512	395	395	0	13.563	By MS/MS	By MS/MS	By MS/MS	0.18306	0.3043	39.88	12	12	Median	0.15068	0.22335	34.266	10	10	Median	0.91638	0.82654	33.036	10	10
E9BFJ3	E9BFJ3	4	4	4			tr|E9BFJ3|E9BFJ3_LEIDB Proteasome subunit alpha type OS=Leishmania donovani (strain BPK282A1) GN=LDBPK_212070 PE=3 SV=1	non-human	1	4	4	4	1	0	4	1	0	4	1	0	4	25.5	25.5	25.5	25.073	231	231	0	18.33	By MS/MS		By MS/MS	0.39946	0.56581	26.871	3	3	Median	NaN	NaN	NaN	1	1	Median	NaN	NaN	NaN	1	1
E9BFJ9	E9BFJ9	2	2	2			tr|E9BFJ9|E9BFJ9_LEIDB Centromere/microtubule binding protein cbf5, putative OS=Leishmania donovani (strain BPK282A1) GN=LDBPK_212130 PE=4 SV=1	non-human	1	2	2	2	0	1	1	0	1	1	0	1	1	9.3	9.3	9.3	48.508	430	430	0	5.1749		By MS/MS	By MS/MS	NaN	NaN	NaN	0	0	Median	NaN	NaN	NaN	0	0	Median	NaN	NaN	NaN	0	0
E9BFK0	E9BFK0	4	4	4			tr|E9BFK0|E9BFK0_LEIDB ATP synthase F1 subunit gamma protein, putative OS=Leishmania donovani (strain BPK282A1) GN=LDBPK_212140 PE=4 SV=1	non-human	1	4	4	4	2	4	3	2	4	3	2	4	3	16.8	16.8	16.8	34.395	303	303	0	31.572	By MS/MS	By MS/MS	By MS/MS	0.24496	0.42887	44.077	6	6	Median	0.20348	0.41015	44.735	6	6	Median	1.1974	1.1386	66.989	6	6
E9BFK2;E9BFK1	E9BFK2;E9BFK1	1;1	1;1	1;1			tr|E9BFK2|E9BFK2_LEIDB Vacuolar ATP synthase, putative (Fragment) OS=Leishmania donovani (strain BPK282A1) GN=LDBPK_212170 PE=3 SV=1;tr|E9BFK1|E9BFK1_LEIDB Vacuolar ATP synthase, putative OS=Leishmania donovani (strain BPK282A1) GN=LDBPK_212160 PE=3 SV=1	non-human	2	1	1	1	1	1	1	1	1	1	1	1	1	14.3	14.3	14.3	10.606	105	105;187	0	3.9866	By MS/MS	By MS/MS	By MS/MS	0.10278	0.19878	59.042	3	1	Median	0.070893	0.13501	52.725	3	1	Plateau	0.72419	0.71321	37.163	3	1
E9BFK4	E9BFK4	1	1	1			tr|E9BFK4|E9BFK4_LEIDB 60S ribosomal protein L37a OS=Leishmania donovani (strain BPK282A1) GN=LDBPK_212190 PE=3 SV=1	non-human	1	1	1	1	1	1	1	1	1	1	1	1	1	19.6	19.6	19.6	10.313	92	92	0	43.32	By MS/MS	By MS/MS	By MS/MS	0.21786	0.46156	46.878	3	3	Plateau	0.18368	0.363	31.332	3	3	Plateau	0.84313	0.79216	21.497	3	3
E9BFK5	E9BFK5	5	3	3			tr|E9BFK5|E9BFK5_LEIDB Proteasome subunit alpha type OS=Leishmania donovani (strain BPK282A1) GN=LDBPK_212200 PE=3 SV=1	non-human	1	5	3	3	2	2	5	1	0	3	1	0	3	23.8	17.6	17.6	26.815	244	244	0	24.896	By MS/MS	By matching	By MS/MS	0.28252	0.54359	52.464	3	3	Median	0.3495	0.56998	51.603	2	2	Median	0.94532	0.8214	22.472	2	2
E9BFL1	E9BFL1	2	2	2			tr|E9BFL1|E9BFL1_LEIDB 60S ribosomal protein L11 (L5, L16) OS=Leishmania donovani (strain BPK282A1) GN=LDBPK_220004 PE=3 SV=1	non-human	1	2	2	2	2	2	2	2	2	2	2	2	2	9	9	9	21.661	188	188	0.0010366	2.9535	By MS/MS	By MS/MS	By MS/MS	0.57897	0.82288	46.457	5	2	Median	0.79235	1.0272	50.278	4	1	Linear	1.3606	1.2453	9.8988	4	1
E9BFL9	E9BFL9	1	1	1			tr|E9BFL9|E9BFL9_LEIDB GMP synthase, putative OS=Leishmania donovani (strain BPK282A1) GN=LDBPK_220013 PE=4 SV=1	non-human	1	1	1	1	1	0	1	1	0	1	1	0	1	2.4	2.4	2.4	71.437	656	656	0.0013477	2.7038	By MS/MS		By MS/MS	NaN	NaN	NaN	1	1	Median	NaN	NaN	NaN	0	0	Median	NaN	NaN	NaN	0	0
E9BFM5	E9BFM5	1	1	1			tr|E9BFM5|E9BFM5_LEIDB Uncharacterized protein OS=Leishmania donovani (strain BPK282A1) GN=LDBPK_220060 PE=4 SV=1	non-human	1	1	1	1	0	0	1	0	0	1	0	0	1	6.9	6.9	6.9	28.272	260	260	0.0099638	1.724			By MS/MS	NaN	NaN	NaN	1	1	Median	NaN	NaN	NaN	1	1	Median	NaN	NaN	NaN	1	1
E9BFN7	E9BFN7	7	7	7			tr|E9BFN7|E9BFN7_LEIDB Uncharacterized protein OS=Leishmania donovani (strain BPK282A1) GN=LDBPK_220180 PE=4 SV=1	non-human	1	7	7	7	0	1	7	0	1	7	0	1	7	13.2	13.2	13.2	60.721	561	561	0	12.78		By MS/MS	By MS/MS	0.32533	0.51917	35.13	7	7	Median	0.26483	0.44281	46.571	5	5	Median	0.81838	0.74532	12.507	5	5
E9BFQ3	E9BFQ3	2	2	2			tr|E9BFQ3|E9BFQ3_LEIDB 40S ribosomal protein S15, putative (Fragment) OS=Leishmania donovani (strain BPK282A1) GN=LDBPK_220340 PE=4 SV=1	non-human	1	2	2	2	2	2	2	2	2	2	2	2	2	46.8	46.8	46.8	7.4655	62	62	0	55.392	By MS/MS	By MS/MS	By MS/MS	0.16881	0.34017	13.882	6	3	Median	0.32074	0.6057	91.086	6	3	Median	1.9415	1.8634	96.121	6	3
E9BFQ4	E9BFQ4	2	2	2			tr|E9BFQ4|E9BFQ4_LEIDB Uncharacterized protein OS=Leishmania donovani (strain BPK282A1) GN=LDBPK_220350 PE=4 SV=1	non-human	1	2	2	2	0	0	2	0	0	2	0	0	2	7.5	7.5	7.5	44.006	415	415	0	9.4141			By MS/MS	NaN	NaN	NaN	1	1	Median	NaN	NaN	NaN	1	1	Median	NaN	NaN	NaN	1	1
E9BFZ6	E9BFZ6	4	4	4			tr|E9BFZ6|E9BFZ6_LEIDB I/6 autoantigen-like protein OS=Leishmania donovani (strain BPK282A1) GN=LDBPK_221310 PE=4 SV=1	non-human	1	4	4	4	0	1	3	0	1	3	0	1	3	26.1	26.1	26.1	23.01	207	207	0	8.9192		By MS/MS	By MS/MS	0.26294	0.55884	53.653	3	2	Plateau	0.17599	0.31083	112.11	2	1	Median	0.93264	0.93406	40.723	2	1
E9BG02	E9BG02	2	2	2			tr|E9BG02|E9BG02_LEIDB 40S ribosomal protein L14, putative OS=Leishmania donovani (strain BPK282A1) GN=LDBPK_221370 PE=4 SV=1	non-human	1	2	2	2	1	2	2	1	2	2	1	2	2	7.3	7.3	7.3	26	233	233	0.0013629	2.8179	By MS/MS	By MS/MS	By MS/MS	0.13649	0.18833	54.217	5	5	Median	0.2234	0.18932	49.82	5	5	Linear	1.7723	1.6153	41.704	5	5
E9BG04	E9BG04	4	4	4			tr|E9BG04|E9BG04_LEIDB Alanyl-tRNA synthetase, putative OS=Leishmania donovani (strain BPK282A1) GN=LDBPK_221390 PE=3 SV=1	non-human	1	4	4	4	0	1	4	0	1	4	0	1	4	5.6	5.6	5.6	105.98	962	962	0	7.6633		By MS/MS	By MS/MS	0.33818	0.53021	43.64	4	4	Median	0.24382	0.35525	42.032	4	4	Median	0.72597	0.63528	40.32	4	4
E9BG25	E9BG25	9	9	9			tr|E9BG25|E9BG25_LEIDB Peroxidoxin OS=Leishmania donovani (strain BPK282A1) GN=LDBPK_230050 PE=4 SV=1	non-human	1	9	9	9	6	6	9	6	6	9	6	6	9	50.9	50.9	50.9	25.384	226	226	0	47.517	By MS/MS	By MS/MS	By MS/MS	0.21657	0.3362	32.685	24	20	Leave out requantified	0.16841	0.2636	29.167	24	20	Leave out requantified	0.80806	0.75392	22.109	24	20
E9BG29	E9BG29	1	1	1			tr|E9BG29|E9BG29_LEIDB Uncharacterized protein OS=Leishmania donovani (strain BPK282A1) GN=LDBPK_230090 PE=4 SV=1	non-human	1	1	1	1	0	0	1	0	0	1	0	0	1	4.1	4.1	4.1	48.61	419	419	0	4.5935			By MS/MS	NaN	NaN	NaN	0	0	Median	NaN	NaN	NaN	0	0	Median	NaN	NaN	NaN	0	0
E9BG32	E9BG32	2	2	2			tr|E9BG32|E9BG32_LEIDB GDP-mannose pyrophosphorylase OS=Leishmania donovani (strain BPK282A1) GN=LDBPK_230120 PE=4 SV=1	non-human	1	2	2	2	0	1	2	0	1	2	0	1	2	6.9	6.9	6.9	41.733	379	379	0	3.9805		By MS/MS	By MS/MS	0.4082	0.86996	31.442	3	3	Plateau	0.40164	0.81733	14.167	3	3	Plateau	0.98392	0.91426	23.109	3	3
E9BG42	E9BG42	2	2	2			tr|E9BG42|E9BG42_LEIDB Endoribonuclease L-PSP (Pb5), putative OS=Leishmania donovani (strain BPK282A1) GN=LDBPK_230220 PE=4 SV=1	non-human	1	2	2	2	2	1	2	2	1	2	2	1	2	16	16	16	16.976	163	163	0	19.639	By MS/MS	By MS/MS	By MS/MS	0.2955	0.43654	36.193	6	5	Median	0.23506	0.31146	24.176	6	5	Median	0.76834	0.67026	36.873	6	5
E9BG61	E9BG61	12	12	12			tr|E9BG61|E9BG61_LEIDB NADP-dependent alcohol dehydrogenase, putative OS=Leishmania donovani (strain BPK282A1) GN=LDBPK_230410 PE=3 SV=1	non-human	1	12	12	12	7	8	11	7	8	11	7	8	11	41.8	41.8	41.8	38.457	352	352	0	40.812	By MS/MS	By MS/MS	By MS/MS	0.28528	0.56465	48.577	32	21	Leave out requantified	0.2067	0.45227	44.229	30	19	Leave out requantified	0.98297	0.9042	16.757	30	19
E9BG63	E9BG63	1	1	1			tr|E9BG63|E9BG63_LEIDB ATP-binding cassette protein subfamily G, member 5, putative OS=Leishmania donovani (strain BPK282A1) GN=LDBPK_230430 PE=3 SV=1	non-human	1	1	1	1	0	0	1	0	0	1	0	0	1	0.8	0.8	0.8	135.13	1246	1246	0.00070721	3.256			By MS/MS	NaN	NaN	NaN	1	0	Median	NaN	NaN	NaN	1	0	Median	NaN	NaN	NaN	1	0
E9BG78	E9BG78	9	9	9			tr|E9BG78|E9BG78_LEIDB Acetyl-coenzyme A synthetase (Fragment) OS=Leishmania donovani (strain BPK282A1) GN=LDBPK_230580 PE=3 SV=1	non-human	1	9	9	9	5	7	9	5	7	9	5	7	9	18	18	18	78.17	705	705	0	45.921	By MS/MS	By MS/MS	By MS/MS	0.23717	0.36368	20.487	15	12	Leave out requantified	0.29757	0.43995	21.851	14	11	Leave out requantified	1.1482	1.0087	11.841	14	11
E9BG91	E9BG91	2	2	2			tr|E9BG91|E9BG91_LEIDB Ubiquitin-activating enzyme e1, putative OS=Leishmania donovani (strain BPK282A1) GN=LDBPK_230710 PE=3 SV=1	non-human	1	2	2	2	1	0	2	1	0	2	1	0	2	2.6	2.6	2.6	115.06	1044	1044	0	5.0541	By MS/MS		By MS/MS	NaN	NaN	NaN	1	0	Median	NaN	NaN	NaN	1	0	Median	NaN	NaN	NaN	1	0
E9BG92	E9BG92	4	4	4			tr|E9BG92|E9BG92_LEIDB Kinesin-like protein OS=Leishmania donovani (strain BPK282A1) GN=LDBPK_230720 PE=3 SV=1	non-human	1	4	4	4	1	1	4	1	1	4	1	1	4	5.8	5.8	5.8	75.244	656	656	0	4.8696	By MS/MS	By MS/MS	By MS/MS	0.49022	0.96392	5.1497	4	1	Median	0.41457	0.84912	29.774	4	1	Median	0.90228	0.89623	30.27	4	1
E9BGA0	E9BGA0	2	2	2			tr|E9BGA0|E9BGA0_LEIDB Uncharacterized protein OS=Leishmania donovani (strain BPK282A1) GN=LDBPK_230810 PE=4 SV=1	non-human	1	2	2	2	0	1	2	0	1	2	0	1	2	3.9	3.9	3.9	56.804	511	511	0	3.5412		By MS/MS	By MS/MS	0.45566	0.93722	9.4252	2	2	Median	0.4083	0.811	37.075	2	2	Median	0.89607	0.87343	35.199	2	2
E9BGA5	E9BGA5	10	10	10			tr|E9BGA5|E9BGA5_LEIDB 3-ketoacyl-CoA thiolase-like protein OS=Leishmania donovani (strain BPK282A1) GN=LDBPK_230860 PE=3 SV=1	non-human	1	10	10	10	6	9	9	6	9	9	6	9	9	34.5	34.5	34.5	47.351	441	441	0	102.42	By MS/MS	By MS/MS	By MS/MS	0.19857	0.36339	32.682	16	9	Leave out requantified	0.13029	0.2297	27.918	16	9	Leave out requantified	0.72117	0.66413	28.905	16	9
E9BGG0	E9BGG0	4	4	4			tr|E9BGG0|E9BGG0_LEIDB T-complex protein 1 subunit gamma OS=Leishmania donovani (strain BPK282A1) GN=LDBPK_231460 PE=3 SV=1	non-human	1	4	4	4	1	1	3	1	1	3	1	1	3	12	12	12	60.201	551	551	0	10.777	By MS/MS	By MS/MS	By MS/MS	0.34607	0.70364	47.965	3	3	Median	0.27231	0.52182	76.288	3	3	Median	0.78687	0.71335	32.698	3	3
E9BGI2	E9BGI2	3	3	3			tr|E9BGI2|E9BGI2_LEIDB Uncharacterized protein OS=Leishmania donovani (strain BPK282A1) GN=LDBPK_231680 PE=4 SV=1	non-human	1	3	3	3	1	1	3	1	1	3	1	1	3	19	19	19	27.383	247	247	0	14.071	By MS/MS	By MS/MS	By MS/MS	NaN	NaN	NaN	1	1	Median	NaN	NaN	NaN	1	1	Median	NaN	NaN	NaN	1	1
E9BGL2	E9BGL2	3	3	3			tr|E9BGL2|E9BGL2_LEIDB Uncharacterized protein OS=Leishmania donovani (strain BPK282A1) GN=LDBPK_231980 PE=4 SV=1	non-human	1	3	3	3	2	1	3	2	1	3	2	1	3	28.4	28.4	28.4	16.852	155	155	0	15.182	By MS/MS	By MS/MS	By MS/MS	0.58216	1.1755	2.771	6	2	Leave out requantified	0.52057	1.0545	25.703	4	0	Leave out requantified	0.95376	0.91386	0.084844	4	0
E9BGL6	E9BGL6	3	3	3			tr|E9BGL6|E9BGL6_LEIDB 60S ribosomal protein L17, putative OS=Leishmania donovani (strain BPK282A1) GN=LDBPK_240040 PE=3 SV=1	non-human	1	3	3	3	0	1	3	0	1	3	0	1	3	15.7	15.7	15.7	19.113	166	166	0	10.056		By MS/MS	By MS/MS	0.26982	0.45166	44.39	2	2	Median	0.28254	0.39847	17.799	2	2	Median	1.0471	0.88289	25.711	2	2
E9BGM5	E9BGM5	2	2	2			tr|E9BGM5|E9BGM5_LEIDB Ankyrin/TPR repeat protein OS=Leishmania donovani (strain BPK282A1) GN=LDBPK_240130 PE=4 SV=1	non-human	1	2	2	2	0	0	2	0	0	2	0	0	2	5.6	5.6	5.6	42.99	394	394	0.0038697	2.2625			By MS/MS	NaN	NaN	NaN	1	1	Median	NaN	NaN	NaN	1	1	Median	NaN	NaN	NaN	1	1
E9BGM6	E9BGM6	3	3	3			tr|E9BGM6|E9BGM6_LEIDB Glycosomal membrane like protein OS=Leishmania donovani (strain BPK282A1) GN=LDBPK_240140 PE=4 SV=1	non-human	1	3	3	3	0	0	3	0	0	3	0	0	3	21.8	21.8	21.8	23.588	220	220	0	15.73			By MS/MS	0.25377	0.44433	115.25	2	2	Median	0.38301	0.60906	80.284	2	2	Median	1.5093	1.339	35.236	2	2
E9BGP3	E9BGP3	2	2	2			tr|E9BGP3|E9BGP3_LEIDB Fumarate hydratase, putative OS=Leishmania donovani (strain BPK282A1) GN=LDBPK_240310 PE=4 SV=1	non-human	1	2	2	2	0	0	2	0	0	2	0	0	2	5.1	5.1	5.1	60.809	549	549	0.001026	2.8626			By MS/MS	NaN	NaN	NaN	1	0	Median	NaN	NaN	NaN	1	0	Median	NaN	NaN	NaN	1	0
E9BGP9	E9BGP9	1	1	1			tr|E9BGP9|E9BGP9_LEIDB Aspartate aminotransferase, putative OS=Leishmania donovani (strain BPK282A1) GN=LDBPK_240370 PE=4 SV=1	non-human	1	1	1	1	0	0	1	0	0	1	0	0	1	5.3	5.3	5.3	47.591	431	431	0	7.5286			By MS/MS	NaN	NaN	NaN	1	1	Median	NaN	NaN	NaN	1	1	Median	NaN	NaN	NaN	1	1
E9BGU0	E9BGU0	9	9	9			tr|E9BGU0|E9BGU0_LEIDB Malic enzyme OS=Leishmania donovani (strain BPK282A1) GN=LDBPK_240780 PE=3 SV=1	non-human	1	9	9	9	0	0	9	0	0	9	0	0	9	19.3	19.3	19.3	62.837	571	571	0	17.122			By MS/MS	0.24359	0.43426	31.334	6	6	Median	0.26928	0.37918	78.606	4	4	Median	1.281	1.1607	65.869	4	4
E9BGU9	E9BGU9	8	8	8			tr|E9BGU9|E9BGU9_LEIDB Triosephosphate isomerase OS=Leishmania donovani (strain BPK282A1) GN=LDBPK_240870 PE=3 SV=1	non-human	1	8	8	8	4	8	8	4	8	8	4	8	8	45.4	45.4	45.4	27.193	251	251	0	41.814	By MS/MS	By MS/MS	By MS/MS	0.22287	0.34982	64.176	16	14	Median	0.24575	0.33644	49.567	13	11	Median	0.8242	0.76102	47.531	13	11
E9BH19	E9BH19	6	6	6			tr|E9BH19|E9BH19_LEIDB IgE-dependent histamine-releasing factor, putative OS=Leishmania donovani (strain BPK282A1) GN=LDBPK_241560 PE=4 SV=1	non-human	1	6	6	6	2	4	5	2	4	5	2	4	5	34.1	34.1	34.1	19.447	170	170	0	13.408	By MS/MS	By MS/MS	By MS/MS	0.27663	0.52627	24.811	8	5	Median	0.163	0.25951	69.559	8	5	Median	0.53922	0.49773	71.936	8	5
E9BH32	E9BH32	5	5	5			tr|E9BH32|E9BH32_LEIDB Succinate dehydrogenase [ubiquinone] flavoprotein subunit, mitochondrial OS=Leishmania donovani (strain BPK282A1) GN=LDBPK_241700 PE=3 SV=1	non-human	1	5	5	5	0	1	4	0	1	4	0	1	4	13.2	13.2	13.2	66.74	607	607	0	12.828		By MS/MS	By MS/MS	0.24314	0.40733	38.196	4	4	Median	0.23261	0.30777	55.01	3	3	Median	1.214	1.0293	64.117	3	3
E9BH53	E9BH53	2	2	2			tr|E9BH53|E9BH53_LEIDB Lysophospholipase, putative OS=Leishmania donovani (strain BPK282A1) GN=LDBPK_241910 PE=4 SV=1	non-human	1	2	2	2	0	0	2	0	0	2	0	0	2	9.7	9.7	9.7	30.178	278	278	0.00035499	3.3207			By MS/MS	NaN	NaN	NaN	1	1	Median	NaN	NaN	NaN	1	1	Median	NaN	NaN	NaN	1	1
E9BH68	E9BH68	1	1	1			tr|E9BH68|E9BH68_LEIDB Uncharacterized protein OS=Leishmania donovani (strain BPK282A1) GN=LDBPK_242060 PE=4 SV=1	non-human	1	1	1	1	0	0	1	0	0	1	0	0	1	6	6	6	29.871	266	266	0.0091269	1.7754			By MS/MS	NaN	NaN	NaN	1	1	Median	NaN	NaN	NaN	1	1	Median	NaN	NaN	NaN	1	1
E9BH76	E9BH76	2	2	2			tr|E9BH76|E9BH76_LEIDB 60S ribosomal protein L26, putative (Fragment) OS=Leishmania donovani (strain BPK282A1) GN=LDBPK_242140 PE=4 SV=1	non-human	1	2	2	2	1	0	2	1	0	2	1	0	2	8.7	8.7	8.7	13.084	115	115	0.0013624	2.8121	By MS/MS		By MS/MS	0.1317	0.19333	0.83209	2	2	Median	0.086923	0.1128	10.544	2	2	Median	0.66001	0.57264	7.8966	2	2
E9BH77	E9BH77	9	9	9			tr|E9BH77|E9BH77_LEIDB Transketolase OS=Leishmania donovani (strain BPK282A1) GN=LDBPK_242150 PE=3 SV=1	non-human	1	9	9	9	5	7	8	5	7	8	5	7	8	24.6	24.6	24.6	71.879	671	671	0	82.775	By MS/MS	By MS/MS	By MS/MS	0.1985	0.31354	38.007	19	13	Leave out requantified	0.19631	0.27481	25.613	19	13	Leave out requantified	1.0777	0.93348	26.484	19	13
E9BH78;E9BH79	E9BH78	3;1	3;1	3;1			tr|E9BH78|E9BH78_LEIDB 40S ribosomal protein S8 OS=Leishmania donovani (strain BPK282A1) GN=LDBPK_242160 PE=3 SV=1	non-human	2	3	3	3	3	2	2	3	2	2	3	2	2	16.8	16.8	16.8	24.976	220	220;66	0	9.8074	By MS/MS	By MS/MS	By MS/MS	0.16471	0.25537	35.04	7	7	Median	0.18399	0.36815	37.793	7	7	Median	1.1716	1.0671	44.578	7	7
E9BH82	E9BH82	17	17	17			tr|E9BH82|E9BH82_LEIDB Uncharacterized protein OS=Leishmania donovani (strain BPK282A1) GN=LDBPK_242200 PE=4 SV=1	non-human	1	17	17	17	9	9	16	9	9	16	9	9	16	34.5	34.5	34.5	55.376	501	501	0	191.76	By MS/MS	By MS/MS	By MS/MS	0.19505	0.30271	26.979	37	24	Leave out requantified	0.15727	0.27823	25.899	34	21	Leave out requantified	0.8711	0.79112	20.437	34	21
[truncated: 2,564 more rows]
[truncated: 110 more columns]

## Sheet: (B) Ldmod_all331
Protein IDs	Protein names	Gene names	Fasta headers	human	Number of proteins	Peptides	Razor + unique peptides	Unique peptides	Peptides 1	Peptides 2	Peptides 3	Razor + unique peptides 1	Razor + unique peptides 2	Razor + unique peptides 3	Unique peptides 1	Unique peptides 2	Unique peptides 3	Sequence coverage [%]	Unique + razor sequence coverage [%]	Unique sequence coverage [%]	Mol. weight [kDa]	Sequence length	Sequence lengths	Q-value	Score	Identification type 1	Identification type 2	Identification type 3	Ratio M/L	Ratio M/L normalized	Ratio M/L variability [%]	Ratio M/L count	Ratio M/L iso-count	Ratio M/L type	Ratio H/L	Ratio H/L normalized	Ratio H/L variability [%]	Ratio H/L count	Ratio H/L iso-count	Ratio H/L type	Ratio H/M	Ratio H/M normalized	Ratio H/M variability [%]	Ratio H/M count	Ratio H/M iso-count	Ratio H/M type	Ratio M/L 1	Ratio M/L 2	Ratio M/L 3
[truncated: 331 more rows]
[truncated: 63 more columns]

[truncated: 5 more sheets: (C) Ldmod_top30, (D) Ago1KDaffected_417, (E) Ago1KDaffected_top30, (F) Ld upreg Ago1dep_21, (G) Ld downreg Ago1dep_50]
