# Supplementary material for: Leishmania infection upregulates and engages host macrophage Argonaute 1, and system-wide proteomics reveals Argonaute 1-dependent host response
Source: Frontiers journal article supplement (doi:10.3389/fimmu.2023.1287539), 2023-11-30
Supplement: Table_2.pdf [file Table_2.pdf]

**Table S2. Ago1-dependent *Leishmania*-modulated host proteins**

| Protein names                                                                       | Gene names | Uniprot ID | Avg<br>log <sub>2</sub> (M/L) | P-value<br>log <sub>2</sub> (M/L) | Avg<br>log <sub>2</sub> (H/M) | P-value<br>log <sub>2</sub> (H/M) | M/L + H/M<br>Manhattan<br>distance | Function*                                                                                                                                                                                                                       |
|-------------------------------------------------------------------------------------|------------|------------|-------------------------------|-----------------------------------|-------------------------------|-----------------------------------|------------------------------------|---------------------------------------------------------------------------------------------------------------------------------------------------------------------------------------------------------------------------------|
| <b><i>L. donovani</i> infection-upregulated Ago1-knockdown affected</b>             |            |            |                               |                                   |                               |                                   |                                    |                                                                                                                                                                                                                                 |
| <b>cAMP-dependent protein kinase type II-<math>\alpha</math> regulatory subunit</b> | PRKAR2A    | P13861     | 0.373                         | 0.008                             | -0.531                        | 0.004                             | 5.449                              | Regulatory subunit of the cAMP-dependent protein kinases involved in cAMP signaling. Type II regulatory chains mediate membrane association by binding to anchoring proteins, including the MAP2 kinase.                        |
| <b>Dihydropyrimidinase-related protein 2</b>                                        | DPYSL2     | Q16555     | 0.612                         | 0.039                             | -0.996                        | 0.005                             | 5.317                              | Plays a role in neuronal development and polarity, as well as in axon growth and guidance, neuronal growth cone collapse and cell migration. May play a role in endocytosis.                                                    |
| <b>Cathepsin G</b>                                                                  | CTSG       | P08311     | 1.211                         | 0.048                             | -1.248                        | 0.035                             | 5.238                              | Serine protease with trypsin- and chymotrypsin-like specificity                                                                                                                                                                 |
| <b>ATP-dependent 6-phosphofructokinase, liver type</b>                              | PFKL       | P17858     | 0.142                         | 0.004                             | -0.334                        | 0.006                             | 5.064                              | Catalyzes the phosphorylation of D-fructose 6-phosphate to fructose 1,6-bisphosphate by ATP, the first committing step of glycolysis. Negatively regulates the phagocyte oxidative burst in response to bacterial infection.    |
| <b>Septin-9</b>                                                                     | SEPT9      | Q9UHD8     | 0.242                         | 0.034                             | -0.204                        | 0.002                             | 4.536                              | Filament-forming cytoskeletal GTPase (By similarity). May play a role in cytokinesis. May play a role in the internalization of 2 intracellular microbial pathogens, <i>Listeria monocytogenes</i> and <i>Shigella flexneri</i> |
| <b>Glyoxylate reductase/hydroxypyruvate reductase</b>                               | GRHPR      | Q9UBQ7     | 0.174                         | 0.007                             | -0.448                        | 0.018                             | 4.494                              | Enzyme with hydroxy-pyruvate reductase, glyoxylate reductase and D-glycerate dehydrogenase enzymatic activities.                                                                                                                |
| <b>Prostaglandin G/H synthase 1</b>                                                 | PTGS1      | P23219     | 0.625                         | 0.049                             | -0.554                        | 0.013                             | 4.373                              | Dual cyclooxygenase and peroxidase in the biosynthesis pathway of prostanoids, with a particular role in the inflammatory response.                                                                                             |
| <b>Glia maturation factor gamma</b>                                                 | GMFG       | O60234     | 0.209                         | 0.028                             | -0.381                        | 0.007                             | 4.305                              | N/A                                                                                                                                                                                                                             |
| <b>Exosome complex component RRP41</b>                                              | EXOSC4     | Q9NPD3     | 0.297                         | 0.043                             | -0.699                        | 0.013                             | 4.241                              | Non-catalytic component of the RNA exosome complex which has 3'->5' exoribonuclease activity and participates in a multitude of cellular RNA processing and degradation events.                                                 |
| <b>Cytoplasmic aconitate hydratase</b>                                              | ACO1       | P21399     | 0.358                         | 0.028                             | -0.621                        | 0.022                             | 4.188                              | Bifunctional iron sensor that switches between 2 activities depending on iron availability.                                                                                                                                     |
| <b>Gamma-glutamylcyclotransferase</b>                                               | GGCT       | O75223     | 0.206                         | 0.037                             | -0.616                        | 0.013                             | 4.138                              | Catalyzes the formation of 5-oxoproline from gamma-glutamyl dipeptides and may play a significant role in glutathione homeostasis. Induces release of cytochrome c from mitochondria with resultant induction of apoptosis.     |
| <b>Aconitate hydratase, mitochondrial</b>                                           | ACO2       | Q99798     | 0.158                         | 0.022                             | -0.265                        | 0.014                             | 3.938                              | Catalyzes the isomerization of citrate to isocitrate via cis-aconitate.                                                                                                                                                         |
| <b>Phosphatidylinositol-binding clathrin assembly protein</b>                       | PICALM     | Q13492     | 0.045                         | 0.010                             | -0.065                        | 0.016                             | 3.890                              | Cytoplasmic adapter protein that plays a critical role in clathrin-mediated endocytosis which is important in processes such as internalization of cell receptors, synaptic transmission or removal of apoptotic cells.         |
| <b>Golgi-associated plant pathogenesis-related protein 1</b>                        | GLIPR2     | Q9H4G4     | 0.475                         | 0.027                             | -0.431                        | 0.047                             | 3.801                              | N/A                                                                                                                                                                                                                             |
| <b>Histidine triad nucleotide-binding protein 2, mitochondrial</b>                  | HINT2      | Q9BX68     | 0.212                         | 0.017                             | -0.247                        | 0.038                             | 3.655                              | Exhibits adenosine 5'-monophosphoramidase activity.                                                                                                                                                                             |

| Protein names                                                                        | Gene names | Uniprot ID | Avg<br>log <sub>2</sub> (M/L) | P-value<br>log <sub>2</sub> (M/L) | Avg<br>log <sub>2</sub> (H/M) | P-value<br>log <sub>2</sub> (H/M) | M/L + H/M<br>Manhattan<br>distance | Function*                                                                                                                                                                                                                       |
|--------------------------------------------------------------------------------------|------------|------------|-------------------------------|-----------------------------------|-------------------------------|-----------------------------------|------------------------------------|---------------------------------------------------------------------------------------------------------------------------------------------------------------------------------------------------------------------------------|
| <b>Reticulon-1;Reticulon</b>                                                         | RTN1       | Q16799     | 0.176                         | 0.046                             | -0.254                        | 0.018                             | 3.512                              | Inhibits amyloid precursor protein processing, probably by blocking BACE1 activity.                                                                                                                                             |
| <b>NAD(P) transhydrogenase, mitochondrial</b>                                        | NNT        | Q13423     | 0.098                         | 0.031                             | -0.327                        | 0.031                             | 3.444                              | Performs transhydrogenation between NADH and NADP, which is coupled to respiration and ATP hydrolysis, and functions as a proton pump across the membrane.                                                                      |
| <b>Peptidyl-prolyl cis-trans isomerase FKBP8;Peptidyl-prolyl cis-trans isomerase</b> | FKBP8      | Q14318     | 0.297                         | 0.022                             | -0.078                        | 0.049                             | 3.351                              | Constitutively inactive PPIase, which becomes active when bound to calmodulin and calcium. Seems to act as a chaperone for BCL2.                                                                                                |
| <b>Rho GTPase-activating protein 1</b>                                               | ARHGAP1    | Q07960     | 0.132                         | 0.028                             | -0.124                        | 0.031                             | 3.311                              | GTPase activator for the Rho, Rac and Cdc42 proteins, converting them to the putatively inactive GDP-bound state.                                                                                                               |
| <b>Hematopoietic lineage cell-specific protein</b>                                   | HCLS1      | P14317     | 0.044                         | 0.040                             | -0.210                        | 0.031                             | 3.157                              | Substrate of the antigen receptor-coupled tyrosine kinase. Plays a role in antigen receptor signaling for both clonal expansion and deletion in lymphoid cells.                                                                 |
| <b>Very long-chain specific acyl-CoA dehydrogenase, mitochondrial</b>                | ACADVL     | P49748     | 0.150                         | 0.046                             | -0.147                        | 0.036                             | 3.080                              | One of the acyl-CoA dehydrogenases that catalyze the first step of mitochondrial fatty acid beta-oxidation, an aerobic process allowing the production of energy from fats                                                      |
| <b><i>L. donovani</i> infection-downregulated Ago1-knockdown affected</b>            |            |            |                               |                                   |                               |                                   |                                    |                                                                                                                                                                                                                                 |
| <b>Thymidine phosphorylase</b>                                                       | TYMP       | P19971     | -0.834                        | 0.003                             | 1.848                         | 0.000                             | 8.671                              | Catalyzes the reversible phosphorolysis of thymidine. The produced molecules are then utilized as carbon and energy sources or in the rescue of pyrimidine bases for nucleotide synthesis.                                      |
| <b>Protein PML (TRIM19)</b>                                                          | PML        | P29590     | -0.205                        | 0.001                             | 0.913                         | 0.002                             | 7.074                              | Functions via its association with PML-nuclear bodies in a wide range of cellular processes, including tumor suppression, transcriptional regulation, apoptosis, senescence, DNA damage response, and viral defense mechanisms. |
| <b>Cytosol aminopeptidase</b>                                                        | LAP3       | P28838     | -0.131                        | 0.012                             | 0.731                         | 0.000                             | 6.540                              | Cytosolic metallopeptidase that catalyzes the removal of unsubstituted N-terminal hydrophobic amino acids from various peptides.                                                                                                |
| <b>Cathepsin L1;Cathepsin L1 heavy chain;Cathepsin L1 light chain</b>                | CTSL       | P07711     | -0.559                        | 0.004                             | 0.903                         | 0.010                             | 5.887                              | Thiol protease important for the overall degradation of proteins in lysosomes (Probable). Plays a critical for normal cellular functions such as general protein turnover, antigen processing and bone remodeling.              |
| <b>Serpin H1</b>                                                                     | SERPINH1   | P50454     | -0.394                        | 0.004                             | 0.570                         | 0.007                             | 5.500                              | Binds specifically to collagen. Could be involved as a chaperone in the biosynthetic pathway of collagen.                                                                                                                       |
| <b>Protein disulfide-isomerase A6</b>                                                | PDIA6      | Q15084     | -0.188                        | 0.026                             | 0.214                         | 0.000                             | 5.389                              | May function as a chaperone that inhibits aggregation of misfolded proteins; Negatively regulates the unfolded protein response (UPR) through binding to UPR sensors such as ERN1.                                              |
| <b>Syntenin-1</b>                                                                    | SDCBP      | O00560     | -0.481                        | 0.005                             | 0.567                         | 0.011                             | 5.319                              | Multifunctional adapter protein involved in diverse array of functions including trafficking of transmembrane proteins, neuro and immunomodulation, exosome biogenesis, and tumorigenesis                                       |
| <b>Calreticulin</b>                                                                  | CALR       | P27797     | -0.212                        | 0.001                             | 0.181                         | 0.012                             | 5.261                              | Calcium-binding chaperone that promotes folding, oligomeric assembly and quality control in the endoplasmic reticulum (ER) via the calreticulin/calnexin cycle.                                                                 |
| <b>Protein disulfide-isomerase A4</b>                                                | PDIA4      | P13667     | -0.129                        | 0.001                             | 0.259                         | 0.016                             | 5.171                              | Catalyzes the rearrangement of -S-S- bonds in proteins.                                                                                                                                                                         |

| Protein names                                                                                          | Gene names          | Uniprot ID | Avg log <sub>2</sub> (M/L) | P-value log <sub>2</sub> (M/L) | Avg log <sub>2</sub> (H/M) | P-value log <sub>2</sub> (H/M) | M/L + H/M Manhattan distance | Function*                                                                                                                                                                                                                                                     |
|--------------------------------------------------------------------------------------------------------|---------------------|------------|----------------------------|--------------------------------|----------------------------|--------------------------------|------------------------------|---------------------------------------------------------------------------------------------------------------------------------------------------------------------------------------------------------------------------------------------------------------|
| <b>Eukaryotic translation initiation factor 3 subunit A</b>                                            | EIF3A               | Q14152     | -0.101                     | 0.016                          | 0.305                      | 0.001                          | 5.159                        | RNA-binding component of the eukaryotic translation initiation factor 3 (eIF-3) complex, which is required for several steps in the initiation of protein synthesis.                                                                                          |
| <b>Fructose-bisphosphate aldolase A;Fructose-bisphosphate aldolase</b>                                 | ALDOA               | P04075     | -0.160                     | 0.008                          | 0.088                      | 0.002                          | 5.109                        | Catalyzes the reversible conversion of beta-D-fructose 1,6-bisphosphate (FBP) into two triose phosphate and plays a key role in glycolysis and gluconeogenesis.                                                                                               |
| <b>40S ribosomal protein S4, X isoform</b>                                                             | RPS4X               | P62701     | -0.223                     | 0.025                          | 0.114                      | 0.001                          | 5.104                        | Component of the ribosome.                                                                                                                                                                                                                                    |
| <b>NAD(P)H dehydrogenase [quinone] 1</b>                                                               | NQO1                | P15559     | -0.429                     | 0.029                          | 0.437                      | 0.003                          | 4.988                        | Flavin-containing quinone reductase that catalyzes two-electron reduction of quinones to hydroquinones using either NADH or NADPH as electron donors.                                                                                                         |
| <b>40S ribosomal protein S3</b>                                                                        | RPS3                | P23396     | -0.156                     | 0.007                          | 0.089                      | 0.003                          | 4.916                        | Involved in translation as a component of the 40S small ribosomal subunit.                                                                                                                                                                                    |
| <b>6-phosphogluconate dehydrogenase, decarboxylating</b>                                               | PGD                 | P52209     | -0.284                     | 0.044                          | 0.357                      | 0.002                          | 4.776                        | Catalyzes the oxidative decarboxylation of 6-phosphogluconate to ribulose 5-phosphate and CO <sub>2</sub> , with concomitant reduction of NADP to NADPH.                                                                                                      |
| <b>40S ribosomal protein S13</b>                                                                       | RPS13               | P62277     | -0.192                     | 0.004                          | 0.124                      | 0.009                          | 4.738                        | Component of the ribosome.                                                                                                                                                                                                                                    |
| <b>Annexin A6;Annexin</b>                                                                              | ANXA6               | P08133     | -0.324                     | 0.002                          | 0.218                      | 0.032                          | 4.732                        | May associate with CD21. May regulate the release of Ca <sup>2+</sup> from intracellular stores.                                                                                                                                                              |
| <b>Glutamine--fructose-6-phosphate aminotransferase [isomerizing] 1</b>                                | GFPT1               | Q06210     | -0.144                     | 0.014                          | 0.719                      | 0.011                          | 4.664                        | Controls the flux of glucose into the hexosamine pathway. Most likely involved in regulating the availability of precursors for N- and O-linked glycosylation of proteins.                                                                                    |
| <b>Annexin A2;Annexin;Putative annexin A2-like protein</b>                                             | ANXA2;<br>ANXA2P2   | P07355     | -0.128                     | 0.004                          | 0.240                      | 0.015                          | 4.609                        | Calcium-regulated membrane-binding protein whose affinity for calcium is greatly enhanced by anionic phospholipids. May be involved in heat-stress response.                                                                                                  |
| <b>Protein disulfide-isomerase</b>                                                                     | P4HB                | P07237     | -0.160                     | 0.005                          | 0.170                      | 0.011                          | 4.569                        | This multifunctional protein catalyzes the formation, breakage and rearrangement of disulfide bonds.                                                                                                                                                          |
| <b>HLA class I histocompatibility antigen, A-2 alpha chain</b>                                         | HLA-A               | P01892     | -0.582                     | 0.018                          | 0.607                      | 0.028                          | 4.496                        | Antigen-presenting major histocompatibility complex class I (MHC I) molecule.                                                                                                                                                                                 |
| <b>Proteasome activator complex subunit 2</b>                                                          | PSME2               | Q9UL46     | -0.247                     | 0.005                          | 0.445                      | 0.035                          | 4.411                        | Implicated in immunoproteasome assembly and required for efficient antigen processing. The PA28 activator complex enhances the generation of class I binding peptides by altering the cleavage pattern of the proteasome.                                     |
| <b>26S proteasome non-ATPase regulatory subunit 7</b>                                                  | PSMD7               | P51665     | -0.154                     | 0.007                          | 0.285                      | 0.016                          | 4.381                        | Component of the 26S proteasome, a multiprotein complex involved in the ATP-dependent degradation of ubiquitinated proteins.                                                                                                                                  |
| <b>Elongation factor 1-alpha 1;Putative elongation factor 1-alpha-like 3;Elongation factor 1-alpha</b> | EEF1A1;<br>EEF1A1P5 | P68104     | -0.381                     | 0.005                          | 0.175                      | 0.032                          | 4.331                        | Promotes the GTP-dependent binding of aminoacyl-tRNA to the A-site of ribosomes during protein biosynthesis. Plays a role in the positive regulation of IFNG transcription in T-helper 1 cells as part of an IFNG promoter-binding complex with TXK and PARP1 |
| <b>Protein disulfide-isomerase A3</b>                                                                  | PDIA3               | P30101     | -0.229                     | 0.034                          | 0.200                      | 0.004                          | 4.327                        | Disulfide isomerase which catalyzes the formation, isomerization, and reduction or oxidation of disulfide bonds.                                                                                                                                              |
| <b>Peptidyl-prolyl cis-trans isomerase B</b>                                                           | PPIB                | P23284     | -0.226                     | 0.010                          | 0.267                      | 0.017                          | 4.287                        | PPIase that catalyzes the cis-trans isomerization of proline imidic peptide bonds in oligopeptides and may therefore assist protein folding.                                                                                                                  |

| Protein names                                                 | Gene names            | Uniprot ID | Avg log <sub>2</sub> (M/L) | P-value log <sub>2</sub> (M/L) | Avg log <sub>2</sub> (H/M) | P-value log <sub>2</sub> (H/M) | M/L + H/M Manhattan distance | Function*                                                                                                                                                                                                                                                                                                                                                                                                  |
|---------------------------------------------------------------|-----------------------|------------|----------------------------|--------------------------------|----------------------------|--------------------------------|------------------------------|------------------------------------------------------------------------------------------------------------------------------------------------------------------------------------------------------------------------------------------------------------------------------------------------------------------------------------------------------------------------------------------------------------|
| Heat shock protein HSP 90-beta                                | HSP90AB1              | P08238     | -0.315                     | 0.006                          | 0.280                      | 0.033                          | 4.277                        | Molecular chaperone that promotes the maturation, structural maintenance and proper regulation of specific target proteins involved for instance in cell cycle control and signal transduction.                                                                                                                                                                                                            |
| Peroxiredoxin-1                                               | PRDX1                 | Q06830     | -0.328                     | 0.013                          | 0.400                      | 0.029                          | 4.146                        | Thiol-specific peroxidase that catalyzes the reduction of hydrogen peroxide and organic hydroperoxides to water and alcohols, respectively. Plays a role in cell protection against oxidative stress by detoxifying peroxides and as sensor of hydrogen peroxide-mediated signaling events.                                                                                                                |
| Myeloid-derived growth factor                                 | MYDGF                 | Q969H8     | -0.144                     | 0.027                          | 0.402                      | 0.011                          | 4.074                        | Bone marrow-derived monocyte and paracrine-acting protein that promotes cardiac myocyte survival and adaptive angiogenesis for cardiac protection and/or repair after myocardial infarction (MI). Stimulates endothelial cell proliferation through a MAPK1/3-, STAT3- and CCND1-mediated signaling pathway. Inhibits cardiac myocyte apoptosis in a PI3K/AKT-dependent signaling pathway (By similarity). |
| 60S ribosomal protein L17                                     | RPL17; RPL17-C18orf32 | P18621     | -0.091                     | 0.028                          | 0.117                      | 0.005                          | 4.052                        | Component of the large ribosomal subunit.                                                                                                                                                                                                                                                                                                                                                                  |
| Long-chain-fatty-acid--CoA ligase 3                           | ACSL3                 | O95573     | -0.425                     | 0.033                          | 0.381                      | 0.018                          | 4.022                        | Acyl-CoA synthetases (ACSL) activate long-chain fatty acids for both synthesis of cellular lipids, and degradation via beta-oxidation                                                                                                                                                                                                                                                                      |
| Pyruvate kinase PKM;Pyruvate kinase                           | PKM                   | P14618     | -0.190                     | 0.005                          | 0.122                      | 0.045                          | 3.974                        | Controls the rate of glycolysis. Catalyzes the final rate-limiting step of glycolysis by mediating the transfer of a phosphoryl group from phosphoenolpyruvate (PEP) to ADP, generating ATP                                                                                                                                                                                                                |
| Heat shock protein 105 kDa                                    | HSPH1                 | Q92598     | -0.239                     | 0.017                          | 0.387                      | 0.028                          | 3.960                        | Acts as a nucleotide-exchange factor (NEF) for chaperone proteins HSPA1A and HSPA1B, promoting the release of ADP from HSPA1A/B thereby triggering client/substrate protein release                                                                                                                                                                                                                        |
| Translation initiation factor eIF-2B subunit alpha            | EIF2B1                | Q14232     | -0.345                     | 0.038                          | 0.379                      | 0.016                          | 3.945                        | Catalyzes the exchange of eukaryotic initiation factor 2-bound GDP for GTP.                                                                                                                                                                                                                                                                                                                                |
| Elongation factor 2                                           | EEF2                  | P13639     | -0.122                     | 0.040                          | 0.211                      | 0.008                          | 3.857                        | Catalyzes the GTP-dependent ribosomal translocation step during translation elongation.                                                                                                                                                                                                                                                                                                                    |
| Prelamin-A/C;Lamin-A/C                                        | LMNA                  | P02545     | -0.083                     | 0.046                          | 0.503                      | 0.012                          | 3.857                        | Components of the nuclear lamina.                                                                                                                                                                                                                                                                                                                                                                          |
| 40S ribosomal protein S20                                     | RPS20                 | P60866     | -0.199                     | 0.022                          | 0.124                      | 0.015                          | 3.798                        | Component of the ribosome                                                                                                                                                                                                                                                                                                                                                                                  |
| ATP synthase subunit O, mitochondrial                         | ATP5O                 | P48047     | -0.097                     | 0.028                          | 0.045                      | 0.010                          | 3.683                        | Mitochondrial membrane ATP synthase (F1F0 ATP synthase or Complex V) produces ATP from ADP in the presence of a proton gradient across the membrane which is generated by electron transport complexes of the respiratory chain.                                                                                                                                                                           |
| Staphylococcal nuclease domain-containing protein 1           | SND1                  | Q7KZF4     | -0.032                     | 0.008                          | 0.127                      | 0.040                          | 3.645                        | Endonuclease that mediates miRNA decay of both protein-free and AGO2-loaded miRNAs                                                                                                                                                                                                                                                                                                                         |
| 78 kDa glucose-regulated protein                              | HSPA5                 | P11021     | -0.210                     | 0.033                          | 0.272                      | 0.021                          | 3.635                        | Endoplasmic reticulum chaperone that plays a key role in protein folding and quality control in the endoplasmic reticulum lumen                                                                                                                                                                                                                                                                            |
| Nucleoside diphosphate kinase;Nucleoside diphosphate kinase B | NME1-NME2; NME2; NME1 | P22392     | -0.165                     | 0.042                          | 0.140                      | 0.012                          | 3.605                        | Major role in the synthesis of nucleoside triphosphates other than ATP. Acts as a transcriptional activator of the MYC gene                                                                                                                                                                                                                                                                                |
| Ribonuclease inhibitor                                        | RNH1                  | P13489     | -0.234                     | 0.037                          | 0.160                      | 0.017                          | 3.583                        | Ribonuclease inhibitor which inhibits RNASE1, RNASE2 and ANG. May play a role in redox homeostasis.                                                                                                                                                                                                                                                                                                        |
| Aldose reductase                                              | AKR1B1                | P15121     | -0.274                     | 0.034                          | 0.068                      | 0.018                          | 3.549                        | Catalyzes the NADPH-dependent reduction of a wide variety of carbonyl-containing compounds to their corresponding alcohols.                                                                                                                                                                                                                                                                                |

| Protein names                            | Gene names       | Uniprot ID | Avg<br>log <sub>2</sub> (M/L) | P-value<br>log <sub>2</sub> (M/L) | Avg<br>log <sub>2</sub> (H/M) | P-value<br>log <sub>2</sub> (H/M) | M/L + H/M<br>Manhattan<br>distance | Function*                                                                                                                                       |
|------------------------------------------|------------------|------------|-------------------------------|-----------------------------------|-------------------------------|-----------------------------------|------------------------------------|-------------------------------------------------------------------------------------------------------------------------------------------------|
| <b>60S ribosomal protein L13</b>         | RPL13            | P26373     | -0.164                        | 0.027                             | 0.175                         | 0.024                             | 3.534                              | Component of the ribosome, a large ribonucleoprotein complex responsible for the synthesis of proteins in the cell                              |
| <b>60S ribosomal protein L5</b>          | RPL5             | P46777     | -0.108                        | 0.036                             | 0.221                         | 0.023                             | 3.406                              | Component of the ribosome, a large ribonucleoprotein complex responsible for the synthesis of proteins in the cell.                             |
| <b>60S ribosomal protein L10a</b>        | RPL10A           | P62906     | -0.163                        | 0.034                             | 0.163                         | 0.028                             | 3.357                              | Component of the large ribosomal subunit.                                                                                                       |
| <b>T-complex protein 1 subunit theta</b> | CCT8             | P50990     | -0.071                        | 0.022                             | 0.095                         | 0.043                             | 3.183                              | Component of the chaperonin-containing T-complex (TRiC), a molecular chaperone complex that assists the folding of proteins upon ATP hydrolysis |
| <b>Heat shock 70 kDa protein 4</b>       | HSPA4<br>(HSP70) | P34932     | -0.084                        | 0.039                             | 0.200                         | 0.044                             | 3.056                              | Chaperone-mediated protein complex assembly                                                                                                     |
| <b>Elongation factor 1-gamma</b>         | EEF1G            | P26641     | -0.172                        | 0.043                             | 0.153                         | 0.046                             | 3.027                              | Probably plays a role in anchoring the complex to other cellular components.                                                                    |
| <b>60S ribosomal protein L6</b>          | RPL6             | Q02878     | -0.062                        | 0.031                             | 0.150                         | 0.049                             | 3.026                              | Component of the large ribosomal subunit.                                                                                                       |

\*from Uniprot (uniprot.org)
